# Supplementary material for: Comparative Phosphoproteomic Analysis Reveals the Response of Starch Metabolism to High-Temperature Stress in Rice Endosperm
Source: Int J Mol Sci. 2021 Sep 29;22(19):10546. doi: 10.3390/ijms221910546 (PMC8508931; doi:10.3390/ijms221910546)
Supplement: Supplementary file 1 [file ijms-22-10546-s001.zip › Supplementary Tables-20210926.xlsx]

## Sheet: Table S1
Table S1. Thermal parameters of 9311 and GLA4 a
Group	To(℃)	Tp(℃)	Tc(℃)	ΔH (J/g)	ΔT1/2 (℃)
9311-C0	64.9±0.1E	71.6±0.0F	77.3±0.1D	4.69±0.5BC	7.75±0.06C
9311-H1	65.6±0.0D	71.0±0.0E	76.8±0.4D	6.24±0.9A	6.75±0.11D
9311-H5	67.2±0.0C	73.6±0.0D	80.0±0.2C	5.45±0.1B	7.80±0.04C
9311-H9	67.3±0.3C	77.1±0.3B	84.1±0.0B	4.98±0.0B	11.75±0.06A
GLA4-C0	70.1±0.0B	75.9±0.0C	80.4±0.0C	4.83±0.0BC	6.12±0.02D
GLA4-H1	69.7±0.0B	76.0±0.0C	80.6±0.3C	4.97±0.1B	6.52±0.00D
GLA4-H5	69.8±0.4B	77.2±0.1B	83.9±0.1B	3.99±0.0D	8.41±0.27C
GLA4-H9	75.5±0.6A	84.6±0.3A	90.9±0.6A	4.98±0.2B	9.55±0.68B
a The results (means ± SD) are presented , three replicates were performed per sample and values in each column with diﬀerent capital letters are signiﬁcantly diﬀerent (P < 0.05).

## Sheet: Table S2
Table S2. List of phosphosites identified in rice endosperm
Protein	Mol weight [kDa]	Sequence length	Proteins	Positions within proteins	Fasta headers	Leading proteins	Positions within Leading proteins	Position	Amino acid	Sequence window	Score	Score for localization	Phospho (STY) Probabilities	Phospho (STY) Score diffs	Position in peptide	Charge	Mass error [ppm]	Intensity of 9311-C-1	Intensity of 9311-C-2	Intensity of 9311-C-3	Intensity of 9311-H-1	Intensity of 9311-H-2	Intensity of 9311-H-3	Intensity of GLA4-C-1	Intensity of GLA4-C-2	Intensity of GLA4-C-3	Intensity of GLA4-H-1	Intensity of GLA4-H-2	Intensity of GLA4-H-3
BGIOSGA000002-PA	196.56	1754	BGIOSGA000002-PA	747	pep chromosome:ASM465v1:1:47247293:47259724:-1 gene:BGIOSGA000002 transcript:BGIOSGA000002-TA gene-biotype:protein-coding transcript-biotype:protein-coding	BGIOSGA000002-PA	747	747	S	ERIAGGKLRNLQKNGSLPEHWRHDLLDSAAE	54.486	49.189	NGS(1)LPEHWR	NGS(49.19)LPEHWR	3	2	0.80179			2637800							27234000	15017000	12322000
BGIOSGA000009-PA	192.58	1736	BGIOSGA000009-PA	614	pep chromosome:ASM465v1:1:47164811:47178554:-1 gene:BGIOSGA000009 transcript:BGIOSGA000009-TA gene-biotype:protein-coding transcript-biotype:protein-coding	BGIOSGA000009-PA	614	614	S	EPSSFQIERDSSASHSFQESSSPNMSKSPSL	48.907	48.907	DS(0.007)S(0.007)AS(0.004)HS(0.874)FQES(0.033)S(0.033)S(0.041)PNMSK	DS(-21.07)S(-21.07)AS(-23.32)HS(13.27)FQES(-14.19)S(-14.19)S(-13.27)PNMS(-32.96)K	7	2	-0.055855
BGIOSGA000009-PA	192.58	1736	BGIOSGA000009-PA	619	pep chromosome:ASM465v1:1:47164811:47178554:-1 gene:BGIOSGA000009 transcript:BGIOSGA000009-TA gene-biotype:protein-coding transcript-biotype:protein-coding	BGIOSGA000009-PA	619	619	S	QIERDSSASHSFQESSSPNMSKSPSLQKTHG	46.069	46.069	DS(0.001)S(0.001)AS(0.001)HS(0.002)FQES(0.107)S(0.443)S(0.443)PNMS(0.002)K	DS(-27.06)S(-27.06)AS(-27.06)HS(-22.73)FQES(-6.19)S(0)S(0)PNMS(-24.01)K	12	2	-0.14471
BGIOSGA000009-PA	192.58	1736	BGIOSGA000009-PA	620	pep chromosome:ASM465v1:1:47164811:47178554:-1 gene:BGIOSGA000009 transcript:BGIOSGA000009-TA gene-biotype:protein-coding transcript-biotype:protein-coding	BGIOSGA000009-PA	620	620	S	IERDSSASHSFQESSSPNMSKSPSLQKTHGF	46.069	46.069	DS(0.001)S(0.001)AS(0.001)HS(0.002)FQES(0.107)S(0.443)S(0.443)PNMS(0.002)K	DS(-27.06)S(-27.06)AS(-27.06)HS(-22.73)FQES(-6.19)S(0)S(0)PNMS(-24.01)K	13	2	-0.14471
BGIOSGA000009-PA	192.58	1736	BGIOSGA000009-PA	1080	pep chromosome:ASM465v1:1:47164811:47178554:-1 gene:BGIOSGA000009 transcript:BGIOSGA000009-TA gene-biotype:protein-coding transcript-biotype:protein-coding	BGIOSGA000009-PA	1080	1080	S	FEIIDRAPKIDPDDASGLKPPNVYGSIEFRN	59.372	59.372	IDPDDAS(1)GLKPPNVYGSIEFR	IDPDDAS(50.09)GLKPPNVY(-50.09)GS(-50.71)IEFR	7	2	1.1798				32846000		19419000
BGIOSGA000009-PA	192.58	1736	BGIOSGA000009-PA	655	pep chromosome:ASM465v1:1:47164811:47178554:-1 gene:BGIOSGA000009 transcript:BGIOSGA000009-TA gene-biotype:protein-coding transcript-biotype:protein-coding	BGIOSGA000009-PA	655	655	S	NSDANHNSHESPNIQSPPSEQMAETRLPTVA	117.77	117.77	NSDANHNSHESPNIQS(0.999)PPS(0.001)EQMAETR	NS(-85.6)DANHNS(-67.57)HES(-65.14)PNIQS(32.58)PPS(-32.58)EQMAET(-59.39)R	16	3	-0.92964	20911000	27179000	21384000	21555000	14213000	19819000			4985600	8744200	7402700
BGIOSGA000009-PA	192.58	1736	BGIOSGA000009-PA	601	pep chromosome:ASM465v1:1:47164811:47178554:-1 gene:BGIOSGA000009 transcript:BGIOSGA000009-TA gene-biotype:protein-coding transcript-biotype:protein-coding	BGIOSGA000009-PA	601	601	S	AKLPKRTPIRNYKEPSSFQIERDSSASHSFQ	121.04	93.011	NYKEPS(0.736)S(0.264)FQIER	NY(-74.74)KEPS(4.46)S(-4.46)FQIER	6	2	-0.96188					4597200			4179700	5780300	14886000	7323700	15182000
BGIOSGA000009-PA	192.58	1736	BGIOSGA000009-PA	602	pep chromosome:ASM465v1:1:47164811:47178554:-1 gene:BGIOSGA000009 transcript:BGIOSGA000009-TA gene-biotype:protein-coding transcript-biotype:protein-coding	BGIOSGA000009-PA	602	602	S	KLPKRTPIRNYKEPSSFQIERDSSASHSFQE	111.79	111.79	NYKEPS(0.15)S(0.85)FQIER	NY(-85.01)KEPS(-7.55)S(7.55)FQIER	7	2	-3.5773								4179700	5780300
BGIOSGA000009-PA	192.58	1736	BGIOSGA000009-PA;BGIOSGA010981-PA	682;749	pep chromosome:ASM465v1:1:47164811:47178554:-1 gene:BGIOSGA000009 transcript:BGIOSGA000009-TA gene-biotype:protein-coding transcript-biotype:protein-coding;pep chromosome:ASM465v1:3:10402959:10411811:-1 gene:BGIOSGA010981 transcript:BGIOSGA010981-TA gene-b	BGIOSGA000009-PA;BGIOSGA010981-PA	682;749	682	S	PLVATERVPSIKRQDSFEMKLPDLPKVDIHP;PTVASERAPSIKRQDSFEMKLPDLPKIDVPL	147.3	136.5	RQDS(1)FEMK	RQDS(136.5)FEMK	4	2	-0.11064	83847000	138400000	160490000	97646000	78819000	44050000	108030000	64217000	52244000	118390000	84142000	96666000
BGIOSGA000009-PA	192.58	1736	BGIOSGA000009-PA	730	pep chromosome:ASM465v1:1:47164811:47178554:-1 gene:BGIOSGA000009 transcript:BGIOSGA000009-TA gene-biotype:protein-coding transcript-biotype:protein-coding	BGIOSGA000009-PA	730	730	S	LTSDPKNERSHSKTFSRPLDMFDNFHAEESK	61.039	61.039	T(0.182)FS(0.818)RPLDMFDNFHAEESK	T(-6.52)FS(6.52)RPLDMFDNFHAEES(-58.24)K	3	3	0.33926				10921000
BGIOSGA000014-PA	132.03	1188	BGIOSGA000014-PA	995	pep chromosome:ASM465v1:1:47072627:47081160:-1 gene:BGIOSGA000014 transcript:BGIOSGA000014-TA gene-biotype:protein-coding transcript-biotype:protein-coding	BGIOSGA000014-PA	995	995	S	GCTTKNIESHLETLASHQNVGNKNFCRSETL	136.34	136.34	NIESHLETLAS(1)HQNVGNK	NIES(-86.68)HLET(-37.26)LAS(37.26)HQNVGNK	11	3	0.25021											23280000	52329000
BGIOSGA000014-PA	132.03	1188	BGIOSGA000014-PA	143	pep chromosome:ASM465v1:1:47072627:47081160:-1 gene:BGIOSGA000014 transcript:BGIOSGA000014-TA gene-biotype:protein-coding transcript-biotype:protein-coding	BGIOSGA000014-PA	143	143	S	EPLGTQRSSSASPHSSVAAPPITNFASPSLV	58.168	58.168	S(0.158)S(0.158)S(0.141)AS(0.159)PHS(0.18)S(0.204)VAAPPITNFASPSLVK	S(-1.1)S(-1.1)S(-1.6)AS(-1.07)PHS(-0.54)S(0.54)VAAPPIT(-40.67)NFAS(-55.94)PS(-57.87)LVK	9	3	-0.17604
BGIOSGA000028-PA	64.094	573	BGIOSGA000028-PA	152	pep chromosome:ASM465v1:1:46875739:46877460:-1 gene:BGIOSGA000028 transcript:BGIOSGA000028-TA gene-biotype:protein-coding transcript-biotype:protein-coding	BGIOSGA000028-PA	152	152	S	PTSAAADAVRALEDGSDSDASAELDEKLEGV	88.992	64.537	ALEDGS(0.923)DS(0.071)DAS(0.006)AELDEK	ALEDGS(11.14)DS(-11.14)DAS(-21.72)AELDEK	6	2	1.3215						9086200
BGIOSGA000028-PA	64.094	573	BGIOSGA000028-PA	154	pep chromosome:ASM465v1:1:46875739:46877460:-1 gene:BGIOSGA000028 transcript:BGIOSGA000028-TA gene-biotype:protein-coding transcript-biotype:protein-coding	BGIOSGA000028-PA	154	154	S	SAAADAVRALEDGSDSDASAELDEKLEGVDL	84.14	84.14	ALEDGS(0.119)DS(0.878)DAS(0.003)AELDEK	ALEDGS(-8.68)DS(8.68)DAS(-24.88)AELDEK	8	2	1.3136		4190600	8612200
BGIOSGA000035-PA	45.203	407	BGIOSGA000035-PA	2	pep chromosome:ASM465v1:1:46774714:46777498:-1 gene:BGIOSGA000035 transcript:BGIOSGA000035-TA gene-biotype:protein-coding transcript-biotype:protein-coding	BGIOSGA000035-PA	2	2	S	--------------MSSSSSPPAASAAARLD	82.069	82.069	S(0.359)S(0.359)S(0.043)S(0.133)S(0.106)PPAASAAAR	S(0)S(0)S(-9.18)S(-4.29)S(-5.31)PPAAS(-45.78)AAAR	1	2	-0.036411
BGIOSGA000035-PA	45.203	407	BGIOSGA000035-PA	3	pep chromosome:ASM465v1:1:46774714:46777498:-1 gene:BGIOSGA000035 transcript:BGIOSGA000035-TA gene-biotype:protein-coding transcript-biotype:protein-coding	BGIOSGA000035-PA	3	3	S	-------------MSSSSSPPAASAAARLDL	82.069	82.069	S(0.359)S(0.359)S(0.043)S(0.133)S(0.106)PPAASAAAR	S(0)S(0)S(-9.18)S(-4.29)S(-5.31)PPAAS(-45.78)AAAR	2	2	-0.036411
BGIOSGA000035-PA	45.203	407	BGIOSGA000035-PA	5	pep chromosome:ASM465v1:1:46774714:46777498:-1 gene:BGIOSGA000035 transcript:BGIOSGA000035-TA gene-biotype:protein-coding transcript-biotype:protein-coding	BGIOSGA000035-PA	5	5	S	-----------MSSSSSPPAASAAARLDLDG	92.611	92.611	S(0.027)S(0.027)S(0.004)S(0.791)S(0.152)PPAASAAAR	S(-14.72)S(-14.72)S(-22.94)S(7.16)S(-7.16)PPAAS(-50.29)AAAR	4	2	0.36245	64109000	86879000	74687000				82754000		1388300	6326200	2131400	36660000
BGIOSGA000035-PA	45.203	407	BGIOSGA000035-PA	6	pep chromosome:ASM465v1:1:46774714:46777498:-1 gene:BGIOSGA000035 transcript:BGIOSGA000035-TA gene-biotype:protein-coding transcript-biotype:protein-coding	BGIOSGA000035-PA	6	6	S	----------MSSSSSPPAASAAARLDLDGN	98.592	63.727	S(0.002)S(0.002)S(0.001)S(0.039)S(0.956)PPAAS(0.001)AAAR	S(-27.34)S(-27.34)S(-30.57)S(-13.95)S(13.95)PPAAS(-29.4)AAAR	5	2	0.32555						68641000			19241000		26328000	13751000
BGIOSGA000036-PA	11.77	106	BGIOSGA000036-PA	101	pep chromosome:ASM465v1:1:46771771:46773321:-1 gene:BGIOSGA000036 transcript:BGIOSGA000036-TA gene-biotype:protein-coding transcript-biotype:protein-coding	BGIOSGA000036-PA	101	101	S	KWKESKDRDDSPDGRSPDGSS----------	83.768	66.485	DDSPDGRS(0.984)PDGS(0.013)S(0.004)	DDS(-45.52)PDGRS(18.95)PDGS(-18.95)S(-24.25)	8	2	0.7871							40515000	44453000	49726000	76826000	36272000	51025000
BGIOSGA000041-PA	64.556	602	BGIOSGA000041-PA	8	pep chromosome:ASM465v1:1:46725131:46728478:-1 gene:BGIOSGA000041 transcript:BGIOSGA000041-TA gene-biotype:protein-coding transcript-biotype:protein-coding	BGIOSGA000041-PA	8	8	S	--------MATAAGASSPARRRPRRGSKGPN	126.76	114.72	ATAAGAS(0.789)S(0.211)PAR	AT(-84.79)AAGAS(5.72)S(-5.72)PAR	7	2	0.36054	124920000	156110000				67612000	79084000			170350000
BGIOSGA000041-PA	64.556	602	BGIOSGA000041-PA	9	pep chromosome:ASM465v1:1:46725131:46728478:-1 gene:BGIOSGA000041 transcript:BGIOSGA000041-TA gene-biotype:protein-coding transcript-biotype:protein-coding	BGIOSGA000041-PA	9	9	S	-------MATAAGASSPARRRPRRGSKGPNS	162.38	160.86	ATAAGAS(0.077)S(0.923)PAR	AT(-117.25)AAGAS(-10.77)S(10.77)PAR	8	2	-0.45813		156110000	217900000	67062000				52689000	15657000		79914000
BGIOSGA000045-PA	50.413	463	BGIOSGA000045-PA	280	pep chromosome:ASM465v1:1:46670664:46673499:-1 gene:BGIOSGA000045 transcript:BGIOSGA000045-TA gene-biotype:protein-coding transcript-biotype:protein-coding	BGIOSGA000045-PA	280	280	T	SKNSREENLPINDADTPDDGPTDIYTKKKGK	83.423	83.423	EENLPINDADT(0.998)PDDGPT(0.002)DIYTK	EENLPINDADT(27.34)PDDGPT(-27.34)DIY(-59.59)T(-39.04)K	11	2	0.030694	10710000		14934000	7936800
BGIOSGA000045-PA	50.413	463	BGIOSGA000045-PA	305	pep chromosome:ASM465v1:1:46670664:46673499:-1 gene:BGIOSGA000045 transcript:BGIOSGA000045-TA gene-biotype:protein-coding transcript-biotype:protein-coding	BGIOSGA000045-PA	305	305	S	TKKKGKGKHSKQQIKSPEEPAGQSTRPDVTI	91.1	86.261	QQIKS(1)PEEPAGQSTRPDVTIAAPAK	QQIKS(42.45)PEEPAGQS(-43.35)T(-43.35)RPDVT(-42.45)IAAPAK	5	3	-0.70157		31379000	55346000	31100000	26346000	28466000			3906700	23690000		20776000
BGIOSGA000055-PA	23.98	214	BGIOSGA000055-PA	178	pep chromosome:ASM465v1:1:46557347:46560582:-1 gene:BGIOSGA000055 transcript:BGIOSGA000055-TA gene-biotype:protein-coding transcript-biotype:protein-coding	BGIOSGA000055-PA	178	178	S	DETKIILHKTIDSVLSRGERLDSLVEKSSDL	140.17	140.17	TIDSVLS(1)R	T(-127.18)IDS(-62.06)VLS(62.06)R	7	2	0.3846	11153000	11530000	14705000	32844000	13678000	14811000	3120100			19067000	11361000	12145000
BGIOSGA000055-PA	23.98	214	BGIOSGA000055-PA;BGIOSGA004860-PA;BGIOSGA004864-PA	185;48;187	pep chromosome:ASM465v1:1:46557347:46560582:-1 gene:BGIOSGA000055 transcript:BGIOSGA000055-TA gene-biotype:protein-coding transcript-biotype:protein-coding;pep chromosome:ASM465v1:1:41028630:41030698:1 gene:BGIOSGA004860 transcript:BGIOSGA004860-TA gene-bi	BGIOSGA000055-PA	185	185	S	HKTIDSVLSRGERLDSLVEKSSDLSAASQMF	115.71	81.525	LDS(1)LVEK	LDS(81.53)LVEK	3	2	-0.55477	21158000	30824000	23678000	35088000	14446000	18072000	17926000	12330000	9432300	30161000	22542000	27216000
BGIOSGA000094-PA	42.989	396	BGIOSGA000094-PA	316	pep chromosome:ASM465v1:1:46035212:46036402:-1 gene:BGIOSGA000094 transcript:BGIOSGA000094-TA gene-biotype:protein-coding transcript-biotype:protein-coding	BGIOSGA000094-PA	316	316	S	SSSDKEKGAAEDVFDSPPLRDIDMEAEQSAM	57.008	54.951	GAAEDVFDS(1)PPLR	GAAEDVFDS(54.95)PPLR	9	2	-1.2236
BGIOSGA000096-PA	31.753	295	BGIOSGA000096-PA	214	pep chromosome:ASM465v1:1:46009604:46010491:-1 gene:BGIOSGA000096 transcript:BGIOSGA000096-TA gene-biotype:protein-coding transcript-biotype:protein-coding	BGIOSGA000096-PA	214	214	S	SSSDKEKGAAEDVFDSPPALRDIDMEAEQSA	77.633	77.633	GAAEDVFDS(1)PPALR	GAAEDVFDS(77.63)PPALR	9	2	0.7277
BGIOSGA000096-PA	31.753	295	BGIOSGA000096-PA	136	pep chromosome:ASM465v1:1:46009604:46010491:-1 gene:BGIOSGA000096 transcript:BGIOSGA000096-TA gene-biotype:protein-coding transcript-biotype:protein-coding	BGIOSGA000096-PA	136	136	S	GDARAMDDDDCEMATSPREEKPASSDDGSKN	59.248	59.248	AMDDDDCEMAT(0.064)S(0.936)PR	AMDDDDCEMAT(-11.63)S(11.63)PR	12	2	0.81622
BGIOSGA000098-PA	118.37	1093	BGIOSGA000098-PA	150	pep chromosome:ASM465v1:1:45955353:45961968:-1 gene:BGIOSGA000098 transcript:BGIOSGA000098-TA gene-biotype:protein-coding transcript-biotype:protein-coding	BGIOSGA000098-PA	150	150	T	KWRTESRSDIISSGATSPRTYTRRSSPLSSP	75.102	75.102	SDIIS(0.014)S(0.038)GAT(0.603)S(0.345)PR	S(-47.77)DIIS(-16.43)S(-12.01)GAT(2.42)S(-2.42)PR	9	2	0.47292	9795700	7044000	14035000		10725000		7009400		1713600	8288800	6994500
BGIOSGA000098-PA	118.37	1093	BGIOSGA000098-PA	151	pep chromosome:ASM465v1:1:45955353:45961968:-1 gene:BGIOSGA000098 transcript:BGIOSGA000098-TA gene-biotype:protein-coding transcript-biotype:protein-coding	BGIOSGA000098-PA	151	151	S	WRTESRSDIISSGATSPRTYTRRSSPLSSPF	66.004	55.196	SDIIS(0.074)S(0.046)GAT(0.44)S(0.44)PR	S(-43.48)DIIS(-7.77)S(-9.84)GAT(0)S(0)PR	10	2	-1.166
BGIOSGA000109-PA	19.549	185	BGIOSGA000109-PA	18	pep chromosome:ASM465v1:1:45828792:45829349:-1 gene:BGIOSGA000109 transcript:BGIOSGA000109-TA gene-biotype:protein-coding transcript-biotype:protein-coding	BGIOSGA000109-PA	18	18	S	KIKMPALFRRRSGSKSPPLPQADPASGGGSP	44.674	44.674	S(0.324)GS(0.324)KS(0.35)PPLPQADPAS(0.002)GGGSPAPTPEEEMER	S(-0.33)GS(-0.33)KS(0.33)PPLPQADPAS(-23.5)GGGS(-29.74)PAPT(-40.63)PEEEMER	5	3	0.49081
BGIOSGA000161-PA	33.515	301	BGIOSGA000161-PA	160	pep chromosome:ASM465v1:1:45061515:45063282:-1 gene:BGIOSGA000161 transcript:BGIOSGA000161-TA gene-biotype:protein-coding transcript-biotype:protein-coding	BGIOSGA000161-PA	160	160	T	LREVPTPLKETPVILTESPPPPTDTSSITVE	70.264	70.264	ETPVILT(0.76)ES(0.233)PPPPT(0.004)DT(0.001)SSITVESLHPFEQNLASLK	ET(-35.28)PVILT(5.13)ES(-5.13)PPPPT(-22.95)DT(-27.11)S(-31.94)S(-33.29)IT(-38.9)VES(-49.52)LHPFEQNLAS(-57.4)LK	7	4	-0.12785				48141000
BGIOSGA000161-PA	33.515	301	BGIOSGA000161-PA	121	pep chromosome:ASM465v1:1:45061515:45063282:-1 gene:BGIOSGA000161 transcript:BGIOSGA000161-TA gene-biotype:protein-coding transcript-biotype:protein-coding	BGIOSGA000161-PA	121	121	S	PVKEAPILREVPVHISPVRETSFLREVPAPV	150.09	69.795	EVPVHIS(1)PVR	EVPVHIS(69.8)PVR	7	3	-0.22683	720030000	714130000	8224500	575450000	357310000	424990000	267650000	139570000	168500000	259310000	202550000	207750000
BGIOSGA000161-PA	33.515	301	BGIOSGA000161-PA	137	pep chromosome:ASM465v1:1:45061515:45063282:-1 gene:BGIOSGA000161 transcript:BGIOSGA000161-TA gene-biotype:protein-coding transcript-biotype:protein-coding	BGIOSGA000161-PA	137	137	S	PVRETSFLREVPAPVSPVKETPILREVPTPL	211.13	99.752	EVPAPVS(1)PVK	EVPAPVS(99.75)PVK	7	2	0.31482	215990000	267820000	239870000	568690000	156050000	172560000	169570000	93920000	91023000	172980000	126250000	124200000
BGIOSGA000161-PA	33.515	301	BGIOSGA000161-PA	91	pep chromosome:ASM465v1:1:45061515:45063282:-1 gene:BGIOSGA000161 transcript:BGIOSGA000161-TA gene-biotype:protein-coding transcript-biotype:protein-coding	BGIOSGA000161-PA	91	91	S	LNIKNEIPVAEKEVHSPLEEDPVVIPAPPYP	264	93.381	EVHS(1)PLEEDPVVIPAPPYPVK	EVHS(91.72)PLEEDPVVIPAPPY(-91.72)PVK	4	3	-0.13915	78400000	87413000	52418000	123260000	79036000	96911000			23460000	57866000	49384000
BGIOSGA000161-PA	33.515	301	BGIOSGA000161-PA	162	pep chromosome:ASM465v1:1:45061515:45063282:-1 gene:BGIOSGA000161 transcript:BGIOSGA000161-TA gene-biotype:protein-coding transcript-biotype:protein-coding	BGIOSGA000161-PA	162	162	S	EVPTPLKETPVILTESPPPPTDTSSITVESL	87.96	87.96	ETPVILT(0.047)ES(0.938)PPPPT(0.003)DT(0.003)S(0.003)S(0.003)IT(0.003)VES(0.001)LHPFEQNLASLK	ET(-45.5)PVILT(-13.01)ES(13.01)PPPPT(-25.16)DT(-25.16)S(-25.16)S(-25.16)IT(-25.16)VES(-29.87)LHPFEQNLAS(-51.72)LK	9	3	0.3818	67523000			111180000
BGIOSGA000185-PA	50.997	473	BGIOSGA000185-PA	196	pep chromosome:ASM465v1:1:44827637:44835278:-1 gene:BGIOSGA000185 transcript:BGIOSGA000185-TA gene-biotype:protein-coding transcript-biotype:protein-coding	BGIOSGA000185-PA	196	196	S	ENKASSDHVGDGDVASPNKGKKATPTRRKTP	62.813	62.813	ASSDHVGDGDVAS(1)PNK	AS(-51.55)S(-51.55)DHVGDGDVAS(51.55)PNK	13	2	0.16003	5705200	12376000	9516800		5924300	5182800	3318000			15632000	7155200
BGIOSGA000195-PA	43.127	406	BGIOSGA000195-PA;BGIOSGA000194-PA	28;28	pep chromosome:ASM465v1:1:44715576:44717859:-1 gene:BGIOSGA000195 transcript:BGIOSGA000195-TA gene-biotype:protein-coding transcript-biotype:protein-coding;pep chromosome:ASM465v1:1:44734640:44737564:-1 gene:BGIOSGA000194 transcript:BGIOSGA000194-TA gene-b	BGIOSGA000195-PA	28	28	S	GAVAEEDPDRRRGDRSGKEGDDDGVDVDEKA	95.067	95.067	S(1)GKEGDDDGVDVDEK	S(95.07)GKEGDDDGVDVDEK	1	2	-0.48745										7966300	5348100
BGIOSGA000199-PA	40.043	364	BGIOSGA000199-PA	40	pep chromosome:ASM465v1:1:44656349:44658262:-1 gene:BGIOSGA000199 transcript:BGIOSGA000199-TA gene-biotype:protein-coding transcript-biotype:protein-coding	BGIOSGA000199-PA	40	40	S	LIVLFLRHRRRASDSSESSSSSPAQPELQGA	62.765	62.765	AS(0.324)DS(0.324)S(0.324)ES(0.013)S(0.013)S(0.002)SSPAQPELQGAR	AS(0)DS(0)S(0)ES(-14.06)S(-14.06)S(-22.21)S(-30.03)S(-37.44)PAQPELQGAR	5	2	3.5851
BGIOSGA000199-PA	40.043	364	BGIOSGA000199-PA	39	pep chromosome:ASM465v1:1:44656349:44658262:-1 gene:BGIOSGA000199 transcript:BGIOSGA000199-TA gene-biotype:protein-coding transcript-biotype:protein-coding	BGIOSGA000199-PA	39	39	S	FLIVLFLRHRRRASDSSESSSSSPAQPELQG	62.765	62.765	AS(0.324)DS(0.324)S(0.324)ES(0.013)S(0.013)S(0.002)SSPAQPELQGAR	AS(0)DS(0)S(0)ES(-14.06)S(-14.06)S(-22.21)S(-30.03)S(-37.44)PAQPELQGAR	4	2	3.5851
BGIOSGA000199-PA	40.043	364	BGIOSGA000199-PA	37	pep chromosome:ASM465v1:1:44656349:44658262:-1 gene:BGIOSGA000199 transcript:BGIOSGA000199-TA gene-biotype:protein-coding transcript-biotype:protein-coding	BGIOSGA000199-PA	37	37	S	AIFLIVLFLRHRRRASDSSESSSSSPAQPEL	62.765	62.765	AS(0.324)DS(0.324)S(0.324)ES(0.013)S(0.013)S(0.002)SSPAQPELQGAR	AS(0)DS(0)S(0)ES(-14.06)S(-14.06)S(-22.21)S(-30.03)S(-37.44)PAQPELQGAR	2	2	3.5851
BGIOSGA000205-PA	49.113	444	BGIOSGA000205-PA	24	pep chromosome:ASM465v1:1:44585325:44591880:-1 gene:BGIOSGA000205 transcript:BGIOSGA000205-TA gene-biotype:protein-coding transcript-biotype:protein-coding	BGIOSGA000205-PA	24	24	S	PVYGRQRSGSSTGSSSPGGVSPSHHRSSSTS	48.883	48.883	S(0.004)GS(0.004)S(0.004)T(0.004)GS(0.023)S(0.119)S(0.532)PGGVS(0.25)PS(0.06)HHR	S(-21.02)GS(-21.47)S(-21.47)T(-21.47)GS(-13.68)S(-6.5)S(3.28)PGGVS(-3.28)PS(-9.5)HHR	9	2	-1.3011					6838200
BGIOSGA000205-PA	49.113	444	BGIOSGA000205-PA	438	pep chromosome:ASM465v1:1:44585325:44591880:-1 gene:BGIOSGA000205 transcript:BGIOSGA000205-TA gene-biotype:protein-coding transcript-biotype:protein-coding	BGIOSGA000205-PA	438	438	S	EQQLWEGSRADIDEDSSAIENH---------	71.933	71.933	ADIDEDS(0.639)S(0.361)AIENH	ADIDEDS(2.48)S(-2.48)AIENH	7	2	-0.53342					6990200
BGIOSGA000205-PA	49.113	444	BGIOSGA000205-PA	18	pep chromosome:ASM465v1:1:44585325:44591880:-1 gene:BGIOSGA000205 transcript:BGIOSGA000205-TA gene-biotype:protein-coding transcript-biotype:protein-coding	BGIOSGA000205-PA	18	18	S	RLRAGSPVYGRQRSGSSTGSSSPGGVSPSHH	57.578	57.578	S(0.461)GS(0.509)S(0.022)T(0.005)GS(0.001)S(0.001)S(0.001)PGGVSPSHHR	S(-0.43)GS(0.43)S(-13.62)T(-20.35)GS(-27.48)S(-27.48)S(-27.48)PGGVS(-49.49)PS(-56.25)HHR	3	3	0.19503				10661000
BGIOSGA000205-PA	49.113	444	BGIOSGA000205-PA	29	pep chromosome:ASM465v1:1:44585325:44591880:-1 gene:BGIOSGA000205 transcript:BGIOSGA000205-TA gene-biotype:protein-coding transcript-biotype:protein-coding	BGIOSGA000205-PA	29	29	S	QRSGSSTGSSSPGGVSPSHHRSSSTSSAASA	77.675	50.055	SGSST(0.001)GS(0.017)S(0.017)S(0.017)PGGVS(0.758)PS(0.19)HHR	S(-44.17)GS(-40.88)S(-37.18)T(-27.65)GS(-16.6)S(-16.6)S(-16.6)PGGVS(6)PS(-6)HHR	14	3	0.66912							24629000			23379000	14317000	20725000
BGIOSGA000205-PA	49.113	444	BGIOSGA000205-PA	19	pep chromosome:ASM465v1:1:44585325:44591880:-1 gene:BGIOSGA000205 transcript:BGIOSGA000205-TA gene-biotype:protein-coding transcript-biotype:protein-coding	BGIOSGA000205-PA	19	19	S	LRAGSPVYGRQRSGSSTGSSSPGGVSPSHHR	53.255	53.255	S(0.303)GS(0.303)S(0.303)T(0.089)GS(0.003)SSPGGVSPSHHR	S(0)GS(0)S(0)T(-5.34)GS(-20.4)S(-28.33)S(-34.43)PGGVS(-40.63)PS(-45.88)HHR	4	2	0.20385
BGIOSGA000205-PA	49.113	444	BGIOSGA000205-PA	31	pep chromosome:ASM465v1:1:44585325:44591880:-1 gene:BGIOSGA000205 transcript:BGIOSGA000205-TA gene-biotype:protein-coding transcript-biotype:protein-coding	BGIOSGA000205-PA	31	31	S	SGSSTGSSSPGGVSPSHHRSSSTSSAASAAA	77.675	76.417	SGSSTGSSSPGGVS(0.429)PS(0.57)HHR	S(-65.07)GS(-57.72)S(-50.4)T(-44.65)GS(-43.34)S(-37.75)S(-31.92)PGGVS(-1.23)PS(1.23)HHR	16	3	0.94174	5497500		19174000
BGIOSGA000205-PA	49.113	444	BGIOSGA000205-PA	142	pep chromosome:ASM465v1:1:44585325:44591880:-1 gene:BGIOSGA000205 transcript:BGIOSGA000205-TA gene-biotype:protein-coding transcript-biotype:protein-coding	BGIOSGA000205-PA	142	142	S	VDRSRQKRFDTGHLNSRESTPKREASALQDE	80.706	80.706	FDTGHLNS(1)R	FDT(-42.14)GHLNS(42.14)R	8	2	-0.20193					9002500		11203000	4530400	4754700	16461000	8724300
BGIOSGA000205-PA	49.113	444	BGIOSGA000205-PA	16	pep chromosome:ASM465v1:1:44585325:44591880:-1 gene:BGIOSGA000205 transcript:BGIOSGA000205-TA gene-biotype:protein-coding transcript-biotype:protein-coding	BGIOSGA000205-PA	16	16	S	MDRLRAGSPVYGRQRSGSSTGSSSPGGVSPS	53.255	53.255	S(0.303)GS(0.303)S(0.303)T(0.089)GS(0.003)SSPGGVSPSHHR	S(0)GS(0)S(0)T(-5.34)GS(-20.4)S(-28.33)S(-34.43)PGGVS(-40.63)PS(-45.88)HHR	1	2	0.20385
BGIOSGA000205-PA	49.113	444	BGIOSGA000205-PA	439	pep chromosome:ASM465v1:1:44585325:44591880:-1 gene:BGIOSGA000205 transcript:BGIOSGA000205-TA gene-biotype:protein-coding transcript-biotype:protein-coding	BGIOSGA000205-PA	439	439	S	QQLWEGSRADIDEDSSAIENH----------	101.61	89.507	ADIDEDS(0.05)S(0.95)AIENH	ADIDEDS(-12.78)S(12.78)AIENH	8	2	0.15852						11632000
BGIOSGA000206-PA	39.776	381	BGIOSGA000206-PA	290	pep chromosome:ASM465v1:1:44570757:44573340:-1 gene:BGIOSGA000206 transcript:BGIOSGA000206-TA gene-biotype:protein-coding transcript-biotype:protein-coding	BGIOSGA000206-PA	290	290	S	FPGRVKEELCPTSFPSPSGQQATVEVRMREG	160.05	134.66	VKEELCPTSFPS(1)PSGQQATVEVR	VKEELCPT(-42.4)S(-42.11)FPS(34.42)PS(-34.42)GQQAT(-74.55)VEVR	12	3	0.30656	56648000	66635000	75965000	106840000	143490000	111240000	94808000	103430000	61090000	328650000	185670000	311870000
BGIOSGA000220-PA	45.572	412	BGIOSGA000220-PA	378	pep chromosome:ASM465v1:1:44372258:44374720:-1 gene:BGIOSGA000220 transcript:BGIOSGA000220-TA gene-biotype:protein-coding transcript-biotype:protein-coding description:S-acyltransferase [Source:UniProtKB/TrEMBL;Acc:B8ABQ7]	BGIOSGA000220-PA	378	378	S	LGNLLEDKDSRFRNASPDLSRDALAIGGLDD	77.533	72.365	NAS(1)PDLSR	NAS(48.53)PDLS(-48.53)R	3	2	-0.56779					6263400	6820400
BGIOSGA000225-PA	170.56	1539	BGIOSGA000225-PA	1165	pep chromosome:ASM465v1:1:44279739:44286823:-1 gene:BGIOSGA000225 transcript:BGIOSGA000225-TA gene-biotype:protein-coding transcript-biotype:protein-coding	BGIOSGA000225-PA	1165	1165	S	PSGVHPQQHRLQEQLSGNLARLDRHWSDANG	140	138.63	LQEQLS(1)GNLAR	LQEQLS(138.63)GNLAR	6	2	0.43071								13103000	12249000	35348000	15526000	23602000
BGIOSGA000225-PA	170.56	1539	BGIOSGA000225-PA	1326	pep chromosome:ASM465v1:1:44279739:44286823:-1 gene:BGIOSGA000225 transcript:BGIOSGA000225-TA gene-biotype:protein-coding transcript-biotype:protein-coding	BGIOSGA000225-PA	1326	1326	S	SLTSSIENSGKLGLRSSSGSMLDMQRGDFSG	51.841	51.841	S(0.371)S(0.371)S(0.255)GS(0.002)MLDMQR	S(0)S(0)S(-1.63)GS(-22.1)MLDMQR	1	2	-1.0099
BGIOSGA000225-PA	170.56	1539	BGIOSGA000225-PA	1327	pep chromosome:ASM465v1:1:44279739:44286823:-1 gene:BGIOSGA000225 transcript:BGIOSGA000225-TA gene-biotype:protein-coding transcript-biotype:protein-coding	BGIOSGA000225-PA	1327	1327	S	LTSSIENSGKLGLRSSSGSMLDMQRGDFSGI	51.841	51.841	S(0.371)S(0.371)S(0.255)GS(0.002)MLDMQR	S(0)S(0)S(-1.63)GS(-22.1)MLDMQR	2	2	-1.0099
BGIOSGA000225-PA	170.56	1539	BGIOSGA000225-PA	1474	pep chromosome:ASM465v1:1:44279739:44286823:-1 gene:BGIOSGA000225 transcript:BGIOSGA000225-TA gene-biotype:protein-coding transcript-biotype:protein-coding	BGIOSGA000225-PA	1474	1474	S	AGSFISPSGTSVDGPSFREMVKSTKKPALQQ	59.585	59.585	EAGS(0.003)FIS(0.148)PS(0.232)GT(0.049)S(0.165)VDGPS(0.404)FR	EAGS(-21.94)FIS(-4.35)PS(-2.41)GT(-9.19)S(-3.9)VDGPS(2.41)FR	17	2	-2.3543
BGIOSGA000225-PA	170.56	1539	BGIOSGA000225-PA	555	pep chromosome:ASM465v1:1:44279739:44286823:-1 gene:BGIOSGA000225 transcript:BGIOSGA000225-TA gene-biotype:protein-coding transcript-biotype:protein-coding	BGIOSGA000225-PA	555	555	S	EDGYFGLELPVRLANSPDDSPFRPLFEVMPH	77.124	77.124	LANS(0.996)PDDS(0.004)PFR	LANS(24.11)PDDS(-24.11)PFR	4	2	0.31023				7433100	3409900
BGIOSGA000225-PA	170.56	1539	BGIOSGA000225-PA	1461	pep chromosome:ASM465v1:1:44279739:44286823:-1 gene:BGIOSGA000225 transcript:BGIOSGA000225-TA gene-biotype:protein-coding transcript-biotype:protein-coding	BGIOSGA000225-PA	1461	1461	S	AQPVDIPVSTNKEAGSFISPSGTSVDGPSFR	41.813	41.813	EAGS(0.952)FIS(0.026)PS(0.013)GT(0.007)S(0.002)VDGPSFR	EAGS(15.69)FIS(-15.69)PS(-18.51)GT(-21.22)S(-27.08)VDGPS(-39.58)FR	4	3	-0.0035223	34764000			47119000
BGIOSGA000225-PA	170.56	1539	BGIOSGA000225-PA	1278	pep chromosome:ASM465v1:1:44279739:44286823:-1 gene:BGIOSGA000225 transcript:BGIOSGA000225-TA gene-biotype:protein-coding transcript-biotype:protein-coding	BGIOSGA000225-PA	1278	1278	S	PSSLFAQPAADNPLRSPADRLSFDDPLAERS	155.56	129.27	DPSSLFAQPAADNPLRS(1)PADR	DPS(-94.25)S(-88.51)LFAQPAADNPLRS(88.51)PADR	17	3	0.45014		33911000		50565000		36465000			5404500	32939000	31982000	29071000
BGIOSGA000225-PA	170.56	1539	BGIOSGA000225-PA	1107	pep chromosome:ASM465v1:1:44279739:44286823:-1 gene:BGIOSGA000225 transcript:BGIOSGA000225-TA gene-biotype:protein-coding transcript-biotype:protein-coding	BGIOSGA000225-PA	1107	1107	S	ERLHRGGQGIHSLERSGSLPGGAPLPNLDVV	148.19	148.19	S(0.586)GS(0.414)LPGGAPLPNLDVVNSLAR	S(1.51)GS(-1.51)LPGGAPLPNLDVVNS(-143.72)LAR	1	2	0.33904	35674000	55376000									119950000	121940000
BGIOSGA000225-PA	170.56	1539	BGIOSGA000225-PA	1077	pep chromosome:ASM465v1:1:44279739:44286823:-1 gene:BGIOSGA000225 transcript:BGIOSGA000225-TA gene-biotype:protein-coding transcript-biotype:protein-coding	BGIOSGA000225-PA	1077	1077	S	RLGHFDLLQSLQRSSSVEQHEHLERSLSLHE	214.48	214.48	SSS(1)VEQHEHLER	S(-57.14)S(-41.9)S(41.9)VEQHEHLER	3	2	0.073304	10625000	21790000		7755200	28686000	8065800	67076000	41106000	87354000	66786000	39629000	56288000
BGIOSGA000225-PA	170.56	1539	BGIOSGA000225-PA	1330	pep chromosome:ASM465v1:1:44279739:44286823:-1 gene:BGIOSGA000225 transcript:BGIOSGA000225-TA gene-biotype:protein-coding transcript-biotype:protein-coding	BGIOSGA000225-PA	1330	1330	S	SIENSGKLGLRSSSGSMLDMQRGDFSGIMGG	137.4	109.72	SSS(0.056)GS(0.944)MLDMQR	S(-49.88)S(-44.48)S(-12.27)GS(12.27)MLDMQR	5	2	0.1701		9490300		10249000	2583500		47152000	16697000	13623000	37240000	31585000
BGIOSGA000225-PA	170.56	1539	BGIOSGA000225-PA	1466	pep chromosome:ASM465v1:1:44279739:44286823:-1 gene:BGIOSGA000225 transcript:BGIOSGA000225-TA gene-biotype:protein-coding transcript-biotype:protein-coding	BGIOSGA000225-PA	1466	1466	S	IPVSTNKEAGSFISPSGTSVDGPSFREMVKS	41.084	41.084	EAGS(0.038)FIS(0.01)PS(0.425)GT(0.425)S(0.1)VDGPSFR	EAGS(-10.5)FIS(-16.16)PS(0)GT(0)S(-6.27)VDGPS(-29.66)FR	9	3	-0.087012
BGIOSGA000225-PA	170.56	1539	BGIOSGA000225-PA	61	pep chromosome:ASM465v1:1:44279739:44286823:-1 gene:BGIOSGA000225 transcript:BGIOSGA000225-TA gene-biotype:protein-coding transcript-biotype:protein-coding	BGIOSGA000225-PA	61	61	S	DESKDQQHLDNSIPLSPQWLYAKPTDAKILG	146.13	84.156	DQQHLDNS(0.001)IPLS(0.999)PQWLYAK	DQQHLDNS(-31.5)IPLS(31.5)PQWLY(-33.27)AK	12	3	0.15565				90966000
BGIOSGA000225-PA	170.56	1539	BGIOSGA000225-PA	239	pep chromosome:ASM465v1:1:44279739:44286823:-1 gene:BGIOSGA000225 transcript:BGIOSGA000225-TA gene-biotype:protein-coding transcript-biotype:protein-coding	BGIOSGA000225-PA	239	239	S	DSRDKWRPRHRQESHSAGTATYRAAPGFGLE	65.173	61.212	QES(0.058)HS(0.889)AGT(0.042)AT(0.011)YR	QES(-11.86)HS(11.86)AGT(-13.3)AT(-19.12)Y(-33.88)R	5	2	-0.89381		7837500					2124500	2298500	2238400	11398000	4251200	10387000
BGIOSGA000225-PA	170.56	1539	BGIOSGA000225-PA	1464	pep chromosome:ASM465v1:1:44279739:44286823:-1 gene:BGIOSGA000225 transcript:BGIOSGA000225-TA gene-biotype:protein-coding transcript-biotype:protein-coding	BGIOSGA000225-PA	1464	1464	S	VDIPVSTNKEAGSFISPSGTSVDGPSFREMV	289.1	289.1	EAGSFIS(1)PSGTSVDGPSFR	EAGS(-65.95)FIS(58.41)PS(-58.41)GT(-112.67)S(-128.3)VDGPS(-178.1)FR	7	2	0.41116	223710000	400990000		540650000	159960000	428440000	69603000	53886000	126610000	95334000	131920000	107370000
BGIOSGA000225-PA	170.56	1539	BGIOSGA000225-PA	1109	pep chromosome:ASM465v1:1:44279739:44286823:-1 gene:BGIOSGA000225 transcript:BGIOSGA000225-TA gene-biotype:protein-coding transcript-biotype:protein-coding	BGIOSGA000225-PA	1109	1109	S	LHRGGQGIHSLERSGSLPGGAPLPNLDVVNS	140.97	135.81	S(0.208)GS(0.792)LPGGAPLPNLDVVNSLAR	S(-5.8)GS(5.8)LPGGAPLPNLDVVNS(-123.68)LAR	3	2	0.31383				45418000			62154000	74775000	35662000	150460000
BGIOSGA000225-PA	170.56	1539	BGIOSGA000225-PA	1469	pep chromosome:ASM465v1:1:44279739:44286823:-1 gene:BGIOSGA000225 transcript:BGIOSGA000225-TA gene-biotype:protein-coding transcript-biotype:protein-coding	BGIOSGA000225-PA	1469	1469	S	STNKEAGSFISPSGTSVDGPSFREMVKSTKK	144.74	136.66	EAGS(0.02)FIS(0.98)PS(0.046)GT(0.082)S(0.869)VDGPS(0.003)FR	EAGS(-16.91)FIS(16.91)PS(-12.74)GT(-10.24)S(10.24)VDGPS(-25.03)FR	12	2	-0.51681		49700000		31457000		30742000
BGIOSGA000225-PA	170.56	1539	BGIOSGA000225-PA	1089	pep chromosome:ASM465v1:1:44279739:44286823:-1 gene:BGIOSGA000225 transcript:BGIOSGA000225-TA gene-biotype:protein-coding transcript-biotype:protein-coding	BGIOSGA000225-PA	1089	1089	S	RSSSVEQHEHLERSLSLHERLHRGGQGIHSL	91.085	85.862	SLS(1)LHER	S(-37.9)LS(37.9)LHER	3	2	-0.10103	35396000	49777000		53024000	79403000	59747000	301020000	148410000	162530000	354150000	171130000	280810000
BGIOSGA000225-PA	170.56	1539	BGIOSGA000225-PA	1054	pep chromosome:ASM465v1:1:44279739:44286823:-1 gene:BGIOSGA000225 transcript:BGIOSGA000225-TA gene-biotype:protein-coding transcript-biotype:protein-coding	BGIOSGA000225-PA	1054	1054	S	GWPMDESGHFIRSGTSPNQGHASRLGHFDLL	126.1	96.745	S(0.003)GT(0.07)S(0.927)PNQGHASR	S(-25.57)GT(-11.22)S(11.22)PNQGHAS(-80.99)R	4	2	-0.013948	28320000		22407000	78984000	38325000	55870000	42069000	26286000	34201000	64017000	40293000	42118000
BGIOSGA000225-PA	170.56	1539	BGIOSGA000225-PA	679	pep chromosome:ASM465v1:1:44279739:44286823:-1 gene:BGIOSGA000225 transcript:BGIOSGA000225-TA gene-biotype:protein-coding transcript-biotype:protein-coding	BGIOSGA000225-PA	679	679	S	VSLDAEEILYTARPNSSTGQSLRDLENDRSD	82.85	82.85	PNS(0.988)S(0.011)TGQSLR	PNS(19.38)S(-19.38)T(-33.69)GQS(-44.29)LR	3	2	-0.77082	19768000						6976900	5692300	5993300	10905000	9612300	12714000
BGIOSGA000225-PA	170.56	1539	BGIOSGA000225-PA	1328	pep chromosome:ASM465v1:1:44279739:44286823:-1 gene:BGIOSGA000225 transcript:BGIOSGA000225-TA gene-biotype:protein-coding transcript-biotype:protein-coding	BGIOSGA000225-PA	1328	1328	S	TSSIENSGKLGLRSSSGSMLDMQRGDFSGIM	163.12	160.88	SSS(1)GSMLDMQR	S(-62.24)S(-49.54)S(49.54)GS(-64.27)MLDMQR	3	2	-1.0693		23952000	19657000	51852000	62271000	42523000	56291000	29094000		49783000	37798000	33102000
BGIOSGA000225-PA	170.56	1539	BGIOSGA000225-PA	1053	pep chromosome:ASM465v1:1:44279739:44286823:-1 gene:BGIOSGA000225 transcript:BGIOSGA000225-TA gene-biotype:protein-coding transcript-biotype:protein-coding	BGIOSGA000225-PA	1053	1053	T	GGWPMDESGHFIRSGTSPNQGHASRLGHFDL	126.1	120.53	S(0.003)GT(0.755)S(0.241)PNQGHASR	S(-23.71)GT(4.95)S(-4.95)PNQGHAS(-94.01)R	3	2	-0.12621		458630000				430500000		186560000	198140000
BGIOSGA000225-PA	170.56	1539	BGIOSGA000225-PA	1468	pep chromosome:ASM465v1:1:44279739:44286823:-1 gene:BGIOSGA000225 transcript:BGIOSGA000225-TA gene-biotype:protein-coding transcript-biotype:protein-coding	BGIOSGA000225-PA	1468	1468	T	VSTNKEAGSFISPSGTSVDGPSFREMVKSTK	41.084	41.084	EAGS(0.038)FIS(0.01)PS(0.425)GT(0.425)S(0.1)VDGPSFR	EAGS(-10.5)FIS(-16.16)PS(0)GT(0)S(-6.27)VDGPS(-29.66)FR	11	3	-0.087012
BGIOSGA000233-PA	94.534	857	BGIOSGA000233-PA	643	pep chromosome:ASM465v1:1:43990344:43998195:-1 gene:BGIOSGA000233 transcript:BGIOSGA000233-TA gene-biotype:protein-coding transcript-biotype:protein-coding	BGIOSGA000233-PA	643	643	S	NKSYTASTSHLEHSLSTIQLREPPVVLKPSE	189.51	159.98	SYTASTSHLEHS(0.007)LS(0.824)T(0.169)IQLR	S(-151.13)Y(-151.32)T(-130.54)AS(-88.84)T(-76.59)S(-70.32)HLEHS(-20.52)LS(6.89)T(-6.89)IQLR	14	3	0.18178	100810000	90109000	195610000	78914000	82413000	111000000		43595000		168460000	30729000	160350000
BGIOSGA000233-PA	94.534	857	BGIOSGA000233-PA	644	pep chromosome:ASM465v1:1:43990344:43998195:-1 gene:BGIOSGA000233 transcript:BGIOSGA000233-TA gene-biotype:protein-coding transcript-biotype:protein-coding	BGIOSGA000233-PA	644	644	T	KSYTASTSHLEHSLSTIQLREPPVVLKPSES	76.21	76.21	SYTASTSHLEHS(0.168)LS(0.353)T(0.479)IQLR	S(-73.11)Y(-73.16)T(-59.42)AS(-36.55)T(-36.55)S(-31.36)HLEHS(-4.56)LS(-1.33)T(1.33)IQLR	15	3	0.17273
BGIOSGA000233-PA	94.534	857	BGIOSGA000233-PA	641	pep chromosome:ASM465v1:1:43990344:43998195:-1 gene:BGIOSGA000233 transcript:BGIOSGA000233-TA gene-biotype:protein-coding transcript-biotype:protein-coding	BGIOSGA000233-PA	641	641	S	SSNKSYTASTSHLEHSLSTIQLREPPVVLKP	77.445	77.445	SYTAST(0.001)S(0.003)HLEHS(0.548)LS(0.353)T(0.095)IQLR	S(-69.26)Y(-69.45)T(-53.58)AS(-33.6)T(-28.32)S(-22.89)HLEHS(1.92)LS(-1.92)T(-7.6)IQLR	12	3	0.38782											109330000
BGIOSGA000233-PA	94.534	857	BGIOSGA000233-PA	636	pep chromosome:ASM465v1:1:43990344:43998195:-1 gene:BGIOSGA000233 transcript:BGIOSGA000233-TA gene-biotype:protein-coding transcript-biotype:protein-coding	BGIOSGA000233-PA	636	636	S	SAKDNSSNKSYTASTSHLEHSLSTIQLREPP	65.168	65.168	SYTAS(0.011)T(0.099)S(0.866)HLEHS(0.084)LS(0.514)T(0.426)IQLR	S(-44)Y(-41.43)T(-34.96)AS(-19.05)T(-9.49)S(9.49)HLEHS(-9.18)LS(0.82)T(-0.82)IQLR	7	3	0.91011										46427000
BGIOSGA000235-PA	18.205	162	BGIOSGA000235-PA	35	pep chromosome:ASM465v1:1:43975395:43977442:-1 gene:BGIOSGA000235 transcript:BGIOSGA000235-TA gene-biotype:protein-coding transcript-biotype:protein-coding description:Transcription and mRNA export factor SUS1 [Source:UniProtKB/TrEMBL;Acc:B8A8E7]	BGIOSGA000235-PA	35	35	T	GESNPIMRASINRPPTPNREEDPQKELSLRE	87.654	87.654	AS(0.001)INRPPT(0.999)PNREEDPQK	AS(-32.45)INRPPT(32.45)PNREEDPQK	8	3	-0.4713	32041000	54834000	48620000	33180000	24395000	27825000	26288000	11488000	10647000	38685000	28277000	34873000
BGIOSGA000236-PA	42.908	404	BGIOSGA000236-PA	154	pep chromosome:ASM465v1:1:43957611:43961294:-1 gene:BGIOSGA000236 transcript:BGIOSGA000236-TA gene-biotype:protein-coding transcript-biotype:protein-coding	BGIOSGA000236-PA	154	154	S	SVLYNGKWLKNMEATSPTSASSSRELSSSTS	122.33	122.33	NMEAT(0.03)S(0.94)PT(0.024)S(0.005)ASSSR	NMEAT(-14.98)S(14.98)PT(-15.9)S(-22.4)AS(-34.46)S(-35.24)S(-35.24)R	6	2	1.1841							24105000	16971000	15361000		15090000	20886000
BGIOSGA000239-PA	137.7	1240	BGIOSGA000239-PA	57	pep chromosome:ASM465v1:1:43903743:43910575:-1 gene:BGIOSGA000239 transcript:BGIOSGA000239-TA gene-biotype:protein-coding transcript-biotype:protein-coding	BGIOSGA000239-PA	57	57	S	GGGGVDPRSPAAGAASPRGPHMNFNPTHYFV	100.19	94.122	SPAAGAAS(1)PR	S(-66.3)PAAGAAS(66.3)PR	8	2	0.37823	16410000				13086000	14972000	14540000				13023000	16748000
BGIOSGA000239-PA	137.7	1240	BGIOSGA000239-PA	755	pep chromosome:ASM465v1:1:43903743:43910575:-1 gene:BGIOSGA000239 transcript:BGIOSGA000239-TA gene-biotype:protein-coding transcript-biotype:protein-coding	BGIOSGA000239-PA	755	755	S	VQDLSLRLSIDGERGSSMNDAPSSDPQDSVQ	52.891	52.891	GS(0.5)S(0.5)MNDAPSSDPQDSVQR	GS(0)S(0)MNDAPS(-33.4)S(-33.05)DPQDS(-47.74)VQR	2	2	1.4082
BGIOSGA000239-PA	137.7	1240	BGIOSGA000239-PA	756	pep chromosome:ASM465v1:1:43903743:43910575:-1 gene:BGIOSGA000239 transcript:BGIOSGA000239-TA gene-biotype:protein-coding transcript-biotype:protein-coding	BGIOSGA000239-PA	756	756	S	QDLSLRLSIDGERGSSMNDAPSSDPQDSVQR	52.891	52.891	GS(0.5)S(0.5)MNDAPSSDPQDSVQR	GS(0)S(0)MNDAPS(-33.4)S(-33.05)DPQDS(-47.74)VQR	3	2	1.4082
BGIOSGA000243-PA	10.928	100	BGIOSGA000243-PA	2	pep chromosome:ASM465v1:1:43873705:43875333:-1 gene:BGIOSGA000243 transcript:BGIOSGA000243-TA gene-biotype:protein-coding transcript-biotype:protein-coding description:Small ubiquitin-related modifier [Source:UniProtKB/TrEMBL;Acc:A2WYE1]	BGIOSGA000243-PA	2	2	S	--------------MSAAGEEDKKPAGGEGG	123.35	40.454	S(1)AAGEEDKKPAGGEGGGAHINLK	S(40.45)AAGEEDKKPAGGEGGGAHINLK	1	3	0.48386				13219000	16461000	11023000	31404000	4411400	12332000	62252000	46599000	54023000
BGIOSGA000244-PA	11.008	101	BGIOSGA000244-PA	3	pep chromosome:ASM465v1:1:43871248:43872582:-1 gene:BGIOSGA000244 transcript:BGIOSGA000244-TA gene-biotype:protein-coding transcript-biotype:protein-coding description:Small ubiquitin-related modifier [Source:UniProtKB/TrEMBL;Acc:A2WYE0]	BGIOSGA000244-PA	3	3	S	-------------MSSPAGEDEKKPAGGEGG	103.14	96.466	S(0.097)S(0.903)PAGEDEKKPAGGEGGGAHINLK	S(-9.71)S(9.71)PAGEDEKKPAGGEGGGAHINLK	2	3	0.76389	16828000	55549000	31663000		80786000	44461000				287620000	254860000	307820000
BGIOSGA000244-PA	11.008	101	BGIOSGA000244-PA	2	pep chromosome:ASM465v1:1:43871248:43872582:-1 gene:BGIOSGA000244 transcript:BGIOSGA000244-TA gene-biotype:protein-coding transcript-biotype:protein-coding description:Small ubiquitin-related modifier [Source:UniProtKB/TrEMBL;Acc:A2WYE0]	BGIOSGA000244-PA	2	2	S	--------------MSSPAGEDEKKPAGGEG	81.534	76.162	S(0.551)S(0.449)PAGEDEKKPAGGEGGGAHINLK	S(0.89)S(-0.89)PAGEDEKKPAGGEGGGAHINLK	1	4	0.12171					6624000		62930000	26414000	31092000	43179000	3211400	54984000
BGIOSGA000249-PA	47.923	440	BGIOSGA000249-PA	243	pep chromosome:ASM465v1:1:43812049:43816140:-1 gene:BGIOSGA000249 transcript:BGIOSGA000249-TA gene-biotype:protein-coding transcript-biotype:protein-coding	BGIOSGA000249-PA	243	243	S	GTMASWAFPRGSFIPSPRWQNPSNYAPMIVP	90.149	90.149	GSFIPS(1)PR	GS(-63.71)FIPS(63.71)PR	6	2	0.015457		2219800	5712400				6866400	3668800	6301200		5499500	14704000
BGIOSGA000255-PA	203.87	1792	BGIOSGA000255-PA	1680	pep chromosome:ASM465v1:1:43689214:43703957:-1 gene:BGIOSGA000255 transcript:BGIOSGA000255-TA gene-biotype:protein-coding transcript-biotype:protein-coding	BGIOSGA000255-PA	1680	1680	S	DRDKSSIVKDESDPNSASKRRKIKRDQSGLE	67.605	67.605	SSIVKDES(0.013)DPNS(0.565)AS(0.422)KR	S(-61.4)S(-61.4)IVKDES(-16.46)DPNS(1.27)AS(-1.27)KR	12	2	0.037787										6346700	2269600
BGIOSGA000255-PA	203.87	1792	BGIOSGA000255-PA	1477	pep chromosome:ASM465v1:1:43689214:43703957:-1 gene:BGIOSGA000255 transcript:BGIOSGA000255-TA gene-biotype:protein-coding transcript-biotype:protein-coding	BGIOSGA000255-PA	1477	1477	S	RLVDKFRPMDHDKSASEEQILSRPEKSKEKA	64.842	64.842	S(0.115)AS(0.885)EEQILSRPEK	S(-8.86)AS(8.86)EEQILS(-53.37)RPEK	3	2	2.0077				13853000		6775300			6368900
BGIOSGA000255-PA	203.87	1792	BGIOSGA000255-PA	1676	pep chromosome:ASM465v1:1:43689214:43703957:-1 gene:BGIOSGA000255 transcript:BGIOSGA000255-TA gene-biotype:protein-coding transcript-biotype:protein-coding	BGIOSGA000255-PA	1676	1676	S	VDDRDRDKSSIVKDESDPNSASKRRKIKRDQ	106.38	89.484	SSIVKDES(0.999)DPNSASK	S(-54.66)S(-54.66)IVKDES(33.15)DPNS(-33.15)AS(-45.44)K	8	2	0.30061	12061000	18478000	23622000	8439300	6130400		10568000	6175500	7040000	10221000	6894700
BGIOSGA000257-PA	103.77	950	BGIOSGA000257-PA	773	pep chromosome:ASM465v1:1:43659749:43665920:-1 gene:BGIOSGA000257 transcript:BGIOSGA000257-TA gene-biotype:protein-coding transcript-biotype:protein-coding	BGIOSGA000257-PA	773	773	S	VGGSTSSQARESTYGSKRQQATEVSAEKQRL	74.533	74.533	EST(0.028)YGS(0.972)KR	ES(-49.32)T(-15.38)Y(-41.92)GS(15.38)KR	6	2	0.99477					4429500				2137800	12337000
BGIOSGA000257-PA	103.77	950	BGIOSGA000257-PA	190	pep chromosome:ASM465v1:1:43659749:43665920:-1 gene:BGIOSGA000257 transcript:BGIOSGA000257-TA gene-biotype:protein-coding transcript-biotype:protein-coding	BGIOSGA000257-PA	190	190	S	KKAVMALHRFYQRSPSSVSHLVSNFRKRLCD	55.841	55.841	S(0.16)PS(0.821)S(0.018)VS(0.001)HLVSNFR	S(-7.1)PS(7.1)S(-16.58)VS(-28.81)HLVS(-51.21)NFR	3	2	-0.22952				4170200								44332000
BGIOSGA000257-PA	103.77	950	BGIOSGA000257-PA	661	pep chromosome:ASM465v1:1:43659749:43665920:-1 gene:BGIOSGA000257 transcript:BGIOSGA000257-TA gene-biotype:protein-coding transcript-biotype:protein-coding	BGIOSGA000257-PA	661	661	S	VVSVGNYKAQDQQETSAHALRFKAYELPPAA	75.89	75.89	AQDQQET(0.226)S(0.774)AHALR	AQDQQET(-5.35)S(5.35)AHALR	8	2	0.98634
BGIOSGA000257-PA	103.77	950	BGIOSGA000257-PA	660	pep chromosome:ASM465v1:1:43659749:43665920:-1 gene:BGIOSGA000257 transcript:BGIOSGA000257-TA gene-biotype:protein-coding transcript-biotype:protein-coding	BGIOSGA000257-PA	660	660	T	GVVSVGNYKAQDQQETSAHALRFKAYELPPA	82.069	81.278	AQDQQET(0.653)S(0.347)AHALR	AQDQQET(2.75)S(-2.75)AHALR	7	2	0.30451					2184900					6791600	3934300
BGIOSGA000260-PA	28.253	280	BGIOSGA000260-PA	27	pep chromosome:ASM465v1:1:43647465:43648307:-1 gene:BGIOSGA000260 transcript:BGIOSGA000260-TA gene-biotype:protein-coding transcript-biotype:protein-coding	BGIOSGA000260-PA	27	27	S	PPYGAGSGGGGNRRSSSPPRGAGDKKETKTK	102.62	102.62	RS(0.08)S(0.915)S(0.005)PPR	RS(-10.57)S(10.57)S(-22.4)PPR	3	2	-0.17452		158980000	113190000		27922000
BGIOSGA000279-PA	61.9	571	BGIOSGA000279-PA	366	pep chromosome:ASM465v1:1:43377917:43381648:-1 gene:BGIOSGA000279 transcript:BGIOSGA000279-TA gene-biotype:protein-coding transcript-biotype:protein-coding description:P-loop containing nucleoside triphosphate hydrolases superfamily protein [Source:Project	BGIOSGA000279-PA	366	366	S	LARQFLQNPYKVIIGSPDLKANHSIQQIIEV	58.37	58.37	VIIGS(1)PDLK	VIIGS(58.37)PDLK	5	2	0.96429
BGIOSGA000280-PA	37.763	335	BGIOSGA000280-PA	8	pep chromosome:ASM465v1:1:43374248:43376332:-1 gene:BGIOSGA000280 transcript:BGIOSGA000280-TA gene-biotype:protein-coding transcript-biotype:protein-coding description:Sas10/Utp3/C1D family [Source:Projected from Arabidopsis thaliana (AT1G07840) TAIR;Acc:A	BGIOSGA000280-PA	8	8	S	--------MDSGGTASPAGVAGDGAGGRGSV	86.8	86.8	MDS(0.001)GGT(0.012)AS(0.987)PAGVAGDGAGGR	MDS(-29.12)GGT(-19.15)AS(19.15)PAGVAGDGAGGR	8	2	0.38835
BGIOSGA000281-PA	11.136	96	BGIOSGA000281-PA	18	pep chromosome:ASM465v1:1:43372430:43372720:-1 gene:BGIOSGA000281 transcript:BGIOSGA000281-TA gene-biotype:protein-coding transcript-biotype:protein-coding	BGIOSGA000281-PA	18	18	T	HYQEVDYCSEEVRSVTPTGGFLGRGGVQQHV	110.66	110.66	SVT(1)PTGGFLGR	S(-43.97)VT(40.17)PT(-40.17)GGFLGR	3	2	0.15893				6631000						54801000	27297000	39123000
BGIOSGA000287-PA	206.01	1858	BGIOSGA000287-PA	1520	pep chromosome:ASM465v1:1:43286830:43299873:-1 gene:BGIOSGA000287 transcript:BGIOSGA000287-TA gene-biotype:protein-coding transcript-biotype:protein-coding	BGIOSGA000287-PA	1520	1520	S	MESEKVQPSFSSVCSSPGGSSQKATPQAFAF	157.84	126.25	VQPSFSSVCS(0.314)S(0.643)PGGS(0.017)S(0.026)QK	VQPS(-92.28)FS(-72.85)S(-62.63)VCS(-3.11)S(3.11)PGGS(-15.88)S(-13.95)QK	11	2	0.86457		16499000	23713000
BGIOSGA000290-PA	50.293	466	BGIOSGA000290-PA	239	pep chromosome:ASM465v1:1:43258301:43262080:-1 gene:BGIOSGA000290 transcript:BGIOSGA000290-TA gene-biotype:protein-coding transcript-biotype:protein-coding	BGIOSGA000290-PA	239	239	S	LIIADGQVTRSVDTASGQLSSQEQKTVDAIV	168.5	168.5	SVDTAS(1)GQLSSQEQK	S(-92.73)VDT(-35.03)AS(35.03)GQLS(-51.29)S(-58.66)QEQK	6	2	0.22123		5386700	11082000
BGIOSGA000291-PA	48.355	444	BGIOSGA000291-PA	169	pep chromosome:ASM465v1:1:43244149:43247399:-1 gene:BGIOSGA000291 transcript:BGIOSGA000291-TA gene-biotype:protein-coding transcript-biotype:protein-coding gene-symbol:MRS2-F description:Magnesium transporter MRS2-F [Source:UniProtKB/Swiss-Prot;Acc:A2WY50]	BGIOSGA000291-PA	169	169	S	EMTNKNSNVVGGMTHSNSMPTLTAAKDGNTK	68.168	59.342	NSNVVGGMT(0.067)HS(0.455)NS(0.455)MPT(0.02)LT(0.002)AAK	NS(-35.41)NVVGGMT(-8.33)HS(0)NS(0)MPT(-13.52)LT(-23.13)AAK	11	2	0.58858
BGIOSGA000291-PA	48.355	444	BGIOSGA000291-PA	280	pep chromosome:ASM465v1:1:43244149:43247399:-1 gene:BGIOSGA000291 transcript:BGIOSGA000291-TA gene-biotype:protein-coding transcript-biotype:protein-coding gene-symbol:MRS2-F description:Magnesium transporter MRS2-F [Source:UniProtKB/Swiss-Prot;Acc:A2WY50]	BGIOSGA000291-PA	280	280	S	MAEMYLTEKLTRQEISETSSRVEVDDPSQLE	84.31	84.31	QEIS(0.926)ET(0.038)S(0.012)S(0.025)R	QEIS(13.9)ET(-13.9)S(-19.03)S(-15.68)R	4	2	2.454				9751300				9240700	11999000		1570400
BGIOSGA000291-PA	48.355	444	BGIOSGA000291-PA	171	pep chromosome:ASM465v1:1:43244149:43247399:-1 gene:BGIOSGA000291 transcript:BGIOSGA000291-TA gene-biotype:protein-coding transcript-biotype:protein-coding gene-symbol:MRS2-F description:Magnesium transporter MRS2-F [Source:UniProtKB/Swiss-Prot;Acc:A2WY50]	BGIOSGA000291-PA	171	171	S	TNKNSNVVGGMTHSNSMPTLTAAKDGNTKVL	71.882	59.574	NSNVVGGMT(0.047)HS(0.098)NS(0.839)MPT(0.012)LT(0.005)AAK	NS(-44.09)NVVGGMT(-12.56)HS(-9.34)NS(9.34)MPT(-18.28)LT(-22.58)AAK	13	2	0.80689			24312000	20166000					21031000		10614000
BGIOSGA000298-PA	93.082	834	BGIOSGA000298-PA	333	pep chromosome:ASM465v1:1:43150844:43159040:-1 gene:BGIOSGA000298 transcript:BGIOSGA000298-TA gene-biotype:protein-coding transcript-biotype:protein-coding	BGIOSGA000298-PA	333	333	S	AEKFSGGVTTTRNKESASDDENEDTGRNKIV	66.595	66.595	ES(0.676)AS(0.324)DDENEDTGR	ES(3.19)AS(-3.19)DDENEDT(-45.86)GR	2	2	0.8137				11447000
BGIOSGA000298-PA	93.082	834	BGIOSGA000298-PA	335	pep chromosome:ASM465v1:1:43150844:43159040:-1 gene:BGIOSGA000298 transcript:BGIOSGA000298-TA gene-biotype:protein-coding transcript-biotype:protein-coding	BGIOSGA000298-PA	335	335	S	KFSGGVTTTRNKESASDDENEDTGRNKIVSD	216.77	158.45	NKESAS(1)DDENEDTGR	NKES(-41.28)AS(41.28)DDENEDT(-58.34)GR	6	2	0.43164		17978000	7628400				45614000	30019000	57558000	47862000	30373000	43042000
BGIOSGA000301-PA	21.973	203	BGIOSGA000301-PA;BGIOSGA016558-PA;BGIOSGA019844-PA;BGIOSGA027739-PA	21;21;21;21	pep chromosome:ASM465v1:1:43124780:43126850:-1 gene:BGIOSGA000301 transcript:BGIOSGA000301-TA gene-biotype:protein-coding transcript-biotype:protein-coding;pep chromosome:ASM465v1:4:21367185:21369876:1 gene:BGIOSGA016558 transcript:BGIOSGA016558-TA gene-bi	BGIOSGA000301-PA;BGIOSGA016558-PA;BGIOSGA019844-PA;BGIOSGA027739-PA	21;21;21;21	21	T	GKYKDELIKNAAYIGTPGKGILAADESTGTI;GKYKDELIRNAAYIGTPGKGILAADESTGTI	101.89	101.89	NAAYIGT(1)PGK	NAAY(-80.42)IGT(80.42)PGK	7	1	0.15143	123540000			56646000	83338000	87785000	57165000	30937000		72208000	1594000	51639000
BGIOSGA000301-PA	21.973	203	BGIOSGA000301-PA;BGIOSGA023247-PA;BGIOSGA016558-PA;BGIOSGA019844-PA;BGIOSGA027739-PA	32;32;32;32;32	pep chromosome:ASM465v1:1:43124780:43126850:-1 gene:BGIOSGA000301 transcript:BGIOSGA000301-TA gene-biotype:protein-coding transcript-biotype:protein-coding;pep chromosome:ASM465v1:6:25292970:25294527:1 gene:BGIOSGA023247 transcript:BGIOSGA023247-TA gene-bi	BGIOSGA000301-PA;BGIOSGA016558-PA;BGIOSGA019844-PA;BGIOSGA027739-PA	32;32;32;32	32	S	AYIGTPGKGILAADESTGTIGKRFASINVEN;AYIGTPGKGILAADESTGTIGKRLASIGVEN	146.96	136.33	GILAADES(0.908)T(0.084)GT(0.008)IGK	GILAADES(10.35)T(-10.35)GT(-20.5)IGK	8	2	0.12138	14577000	13477000	9148500	65065000	20435000	29287000			5129400	21238000	17422000
BGIOSGA000301-PA	21.973	203	BGIOSGA000301-PA;BGIOSGA023247-PA;BGIOSGA016558-PA;BGIOSGA019844-PA;BGIOSGA027739-PA	35;35;35;35;35	pep chromosome:ASM465v1:1:43124780:43126850:-1 gene:BGIOSGA000301 transcript:BGIOSGA000301-TA gene-biotype:protein-coding transcript-biotype:protein-coding;pep chromosome:ASM465v1:6:25292970:25294527:1 gene:BGIOSGA023247 transcript:BGIOSGA023247-TA gene-bi	BGIOSGA000301-PA;BGIOSGA016558-PA;BGIOSGA019844-PA;BGIOSGA027739-PA	35;35;35;35	35	T	GTPGKGILAADESTGTIGKRFASINVENVED;GTPGKGILAADESTGTIGKRFASINVENVEE;GTPGKGILAADESTGTIGKRLASIGVENVEE	204.82	204.82	GILAADEST(0.004)GT(0.995)IGKR	GILAADES(-34.56)T(-23.56)GT(23.56)IGKR	11	2	0.13339	13471000	10241000		10060000	21559000	5287900	16767000		9131700	25850000		22894000
BGIOSGA000301-PA	21.973	203	BGIOSGA000301-PA;BGIOSGA019844-PA	42;42	pep chromosome:ASM465v1:1:43124780:43126850:-1 gene:BGIOSGA000301 transcript:BGIOSGA000301-TA gene-biotype:protein-coding transcript-biotype:protein-coding;pep chromosome:ASM465v1:5:20836415:20838289:1 gene:BGIOSGA019844 transcript:BGIOSGA019844-TA gene-bi	BGIOSGA000301-PA;BGIOSGA019844-PA	42;42	42	S	LAADESTGTIGKRFASINVENVEENRRSLRE	114.7	43.512	RFAS(1)INVENVEENR	RFAS(43.51)INVENVEENR	4	2	-0.47969						13098000	36049000	18138000	21762000	24733000	14407000
BGIOSGA000301-PA	21.973	203	BGIOSGA000301-PA;BGIOSGA023247-PA;BGIOSGA016558-PA;BGIOSGA019844-PA;BGIOSGA027739-PA	33;33;33;33;33	pep chromosome:ASM465v1:1:43124780:43126850:-1 gene:BGIOSGA000301 transcript:BGIOSGA000301-TA gene-biotype:protein-coding transcript-biotype:protein-coding;pep chromosome:ASM465v1:6:25292970:25294527:1 gene:BGIOSGA023247 transcript:BGIOSGA023247-TA gene-bi	BGIOSGA000301-PA;BGIOSGA016558-PA;BGIOSGA019844-PA;BGIOSGA027739-PA	33;33;33;33	33	T	YIGTPGKGILAADESTGTIGKRFASINVENV;YIGTPGKGILAADESTGTIGKRLASIGVENV	110.97	110.97	GILAADES(0.172)T(0.523)GT(0.305)IGKR	GILAADES(-4.83)T(2.34)GT(-2.34)IGKR	9	2	0.10528											14526000
BGIOSGA000322-PA	106.71	957	BGIOSGA000322-PA	931	pep chromosome:ASM465v1:1:42715107:42720870:-1 gene:BGIOSGA000322 transcript:BGIOSGA000322-TA gene-biotype:protein-coding transcript-biotype:protein-coding description:ARM repeat superfamily protein [Source:Projected from Arabidopsis thaliana (AT1G05960) T	BGIOSGA000322-PA	931	931	S	PETQSTRKERMRRSDSASSESDRSFRLPPAS	105.2	105.2	S(0.001)DS(0.999)ASSESDR	S(-31.25)DS(31.25)AS(-41.26)S(-54.19)ES(-64.59)DR	3	2	0.564							14577000	6810300	5335000		3946400
BGIOSGA000325-PA	115.33	1055	BGIOSGA000325-PA	316	pep chromosome:ASM465v1:1:42682925:42691757:-1 gene:BGIOSGA000325 transcript:BGIOSGA000325-TA gene-biotype:protein-coding transcript-biotype:protein-coding description:Cohesin-like protein [Source:UniProtKB/TrEMBL;Acc:Q7XYH6]	BGIOSGA000325-PA	316	316	S	TPGLMEETVPSRVHESPVLSPQRKASPSSND	168.18	77.894	VHES(1)PVLS(1)PQRK	VHES(77.89)PVLS(77.89)PQRK	4	2	0.81178	82873000	76666000	89697000	130500000	100130000	97395000	34359000	15167000	15908000	51039000	30179000	28721000
BGIOSGA000325-PA	115.33	1055	BGIOSGA000325-PA	320	pep chromosome:ASM465v1:1:42682925:42691757:-1 gene:BGIOSGA000325 transcript:BGIOSGA000325-TA gene-biotype:protein-coding transcript-biotype:protein-coding description:Cohesin-like protein [Source:UniProtKB/TrEMBL;Acc:Q7XYH6]	BGIOSGA000325-PA	320	320	S	MEETVPSRVHESPVLSPQRKASPSSNDETAK	190.68	77.894	VHES(1)PVLS(1)PQRK	VHES(77.89)PVLS(77.89)PQRK	8	2	0.81178	149840000	147090000	179990000	164590000	63727000	131820000	68142000	32115000	31955000	95449000	52023000	60760000
BGIOSGA000325-PA	115.33	1055	BGIOSGA000325-PA	326	pep chromosome:ASM465v1:1:42682925:42691757:-1 gene:BGIOSGA000325 transcript:BGIOSGA000325-TA gene-biotype:protein-coding transcript-biotype:protein-coding description:Cohesin-like protein [Source:UniProtKB/TrEMBL;Acc:Q7XYH6]	BGIOSGA000325-PA	326	326	S	SRVHESPVLSPQRKASPSSNDETAKTAENAN	138.09	134.81	KAS(1)PSSNDETAK	KAS(44.88)PS(-44.88)S(-49.07)NDET(-84.17)AK	3	2	0.79979	9784700		7214800				56822000	48047000	59604000	118530000	69918000	99275000
BGIOSGA000358-PA	55.26	491	BGIOSGA000358-PA	384	pep chromosome:ASM465v1:1:42272768:42276005:-1 gene:BGIOSGA000358 transcript:BGIOSGA000358-TA gene-biotype:protein-coding transcript-biotype:protein-coding	BGIOSGA000358-PA	384	384	S	DSAEVPDCTLASKDSSEPETFAKENETSTSC	92.866	92.866	DS(0.001)S(0.999)EPETFAK	DS(-32.22)S(32.22)EPET(-48.25)FAK	3	2	1.196	2704500	6275300	13795000	11217000	7560900
BGIOSGA000358-PA	55.26	491	BGIOSGA000358-PA	288	pep chromosome:ASM465v1:1:42272768:42276005:-1 gene:BGIOSGA000358 transcript:BGIOSGA000358-TA gene-biotype:protein-coding transcript-biotype:protein-coding	BGIOSGA000358-PA	288	288	S	KRFHLSSEKCEEQDGSDIDDDENSRPSFLSI	107.2	107.2	CEEQDGS(1)DIDDDENSRPSFLSIQK	CEEQDGS(59.11)DIDDDENS(-59.77)RPS(-59.11)FLS(-64.85)IQK	7	3	0.50306	47660000	77535000	66353000	50150000	26030000	28063000			10614000
BGIOSGA000373-PA	100.14	892	BGIOSGA000373-PA	751	pep chromosome:ASM465v1:1:42034294:42045166:-1 gene:BGIOSGA000373 transcript:BGIOSGA000373-TA gene-biotype:protein-coding transcript-biotype:protein-coding	BGIOSGA000373-PA	751	751	S	TSRRLNDRKSVIVIDSDSDEDEDPHPEQHEP	103.21	103.21	SVIVIDS(0.957)DS(0.043)DEDEDPHPEQHEPER	S(-68.39)VIVIDS(13.44)DS(-13.44)DEDEDPHPEQHEPER	7	3	-0.52884			24231000
BGIOSGA000373-PA	100.14	892	BGIOSGA000373-PA	123	pep chromosome:ASM465v1:1:42034294:42045166:-1 gene:BGIOSGA000373 transcript:BGIOSGA000373-TA gene-biotype:protein-coding transcript-biotype:protein-coding	BGIOSGA000373-PA	123	123	S	CLKLALFVEKNSEANSDGETVEFRYTENYLV	87.824	87.824	NSEANS(0.995)DGET(0.005)VEFR	NS(-44.74)EANS(22.98)DGET(-22.98)VEFR	6	2	-0.18197
BGIOSGA000383-PA	38.427	349	BGIOSGA000383-PA	101	pep chromosome:ASM465v1:1:41893882:41894931:-1 gene:BGIOSGA000383 transcript:BGIOSGA000383-TA gene-biotype:protein-coding transcript-biotype:protein-coding	BGIOSGA000383-PA	101	101	S	NDEWADPMKNVILPNSPKESESSISCAGSNN	138.25	138.25	NVILPNS(1)PK	NVILPNS(138.25)PK	7	2	0.088813	22763000	20700000	15193000	46688000	53554000	60558000	15297000	8451500	8848900	36838000	23110000	40202000
BGIOSGA000406-PA	73.822	663	BGIOSGA000406-PA	14	pep chromosome:ASM465v1:1:41500597:41507320:-1 gene:BGIOSGA000406 transcript:BGIOSGA000406-TA gene-biotype:protein-coding transcript-biotype:protein-coding	BGIOSGA000406-PA	14	14	S	--MGGLCSKGSAVDKSPSDTTLGPDRVVRGH	95.409	88.992	GSAVDKS(0.991)PS(0.006)DT(0.002)T(0.002)LGPDR	GS(-51.41)AVDKS(22.32)PS(-22.32)DT(-28.07)T(-28.07)LGPDR	7	2	0.15077	13505000	11537000	13940000		17374000	12649000	12066000		7865100	20711000	11786000	15984000
BGIOSGA000406-PA	73.822	663	BGIOSGA000406-PA	597	pep chromosome:ASM465v1:1:41500597:41507320:-1 gene:BGIOSGA000406 transcript:BGIOSGA000406-TA gene-biotype:protein-coding transcript-biotype:protein-coding	BGIOSGA000406-PA	597	597	S	LRDVKYRKFIPGISKSQEFETKSRHSKQSRL	167.89	88.136	S(1)QEFETK	S(67.27)QEFET(-67.27)K	1	2	0.51351	3496100	1674900	2120200				16304000	12721000	12639000	30963000	19963000	25227000
BGIOSGA000406-PA	73.822	663	BGIOSGA000406-PA	617	pep chromosome:ASM465v1:1:41500597:41507320:-1 gene:BGIOSGA000406 transcript:BGIOSGA000406-TA gene-biotype:protein-coding transcript-biotype:protein-coding	BGIOSGA000406-PA	617	617	S	TKSRHSKQSRLSKSNSHSPSSGNMKELLSIR	92.636	92.636	S(0.055)NS(0.939)HS(0.007)PSSGNMK	S(-12.35)NS(12.35)HS(-21.43)PS(-44.05)S(-58.3)GNMK	3	2	-0.32146	22830000	29808000	49627000	14812000	20583000	10752000			6230600		8847900
BGIOSGA000406-PA	73.822	663	BGIOSGA000406-PA	571	pep chromosome:ASM465v1:1:41500597:41507320:-1 gene:BGIOSGA000406 transcript:BGIOSGA000406-TA gene-biotype:protein-coding transcript-biotype:protein-coding	BGIOSGA000406-PA	571	571	S	GHTITLSPNKASSNSSPLLTQEDQDMLRDVK	97.579	97.579	AS(0.032)S(0.024)NS(0.234)S(0.709)PLLTQEDQDMLR	AS(-13.41)S(-14.73)NS(-4.81)S(4.81)PLLT(-34.43)QEDQDMLR	6	2	-2.3149	18268000		20297000	22219000
BGIOSGA000406-PA	73.822	663	BGIOSGA000406-PA	551	pep chromosome:ASM465v1:1:41500597:41507320:-1 gene:BGIOSGA000406 transcript:BGIOSGA000406-TA gene-biotype:protein-coding transcript-biotype:protein-coding	BGIOSGA000406-PA	551	551	S	KSANGERSPIKSPVRSPTQRGHTITLSPNKA	70.837	65.808	S(0.985)PIKS(0.029)PVRS(0.973)PT(0.013)QR	S(18.08)PIKS(-18.08)PVRS(18.58)PT(-18.72)QR	9	3	0.25705	25732000	31123000	32341000	12602000	15118000	14733000	17206000	7053400	10405000	14577000	9474400	17272000
BGIOSGA000406-PA	73.822	663	BGIOSGA000406-PA	619	pep chromosome:ASM465v1:1:41500597:41507320:-1 gene:BGIOSGA000406 transcript:BGIOSGA000406-TA gene-biotype:protein-coding transcript-biotype:protein-coding	BGIOSGA000406-PA	619	619	S	SRHSKQSRLSKSNSHSPSSGNMKELLSIRRM	102.05	102.05	S(0.001)NS(0.007)HS(0.985)PS(0.005)S(0.002)GNMK	S(-28.78)NS(-21.58)HS(21.58)PS(-23.16)S(-27.32)GNMK	5	2	0.42123	11491000	21282000	52579000	16679000	20705000			8315200	7606900	16841000	10151000
BGIOSGA000406-PA	73.822	663	BGIOSGA000406-PA	16	pep chromosome:ASM465v1:1:41500597:41507320:-1 gene:BGIOSGA000406 transcript:BGIOSGA000406-TA gene-biotype:protein-coding transcript-biotype:protein-coding	BGIOSGA000406-PA	16	16	S	MGGLCSKGSAVDKSPSDTTLGPDRVVRGHER	83.751	83.751	GSAVDKS(0.173)PS(0.615)DT(0.08)T(0.132)LGPDR	GS(-56.86)AVDKS(-5.51)PS(5.51)DT(-8.86)T(-6.68)LGPDR	9	2	-0.17718	3606800									10061000	2876800
BGIOSGA000406-PA	73.822	663	BGIOSGA000406-PA	562	pep chromosome:ASM465v1:1:41500597:41507320:-1 gene:BGIOSGA000406 transcript:BGIOSGA000406-TA gene-biotype:protein-coding transcript-biotype:protein-coding	BGIOSGA000406-PA	562	562	S	SPVRSPTQRGHTITLSPNKASSNSSPLLTQE	248.6	221.95	GHTITLS(1)PNK	GHT(-123.22)IT(-46.61)LS(46.61)PNK	7	2	0.22299	42226000	52878000	49090000		26734000	20800000	34175000	14147000	20393000	29487000	19803000	26691000
BGIOSGA000406-PA	73.822	663	BGIOSGA000406-PA	567	pep chromosome:ASM465v1:1:41500597:41507320:-1 gene:BGIOSGA000406 transcript:BGIOSGA000406-TA gene-biotype:protein-coding transcript-biotype:protein-coding	BGIOSGA000406-PA	567	567	S	PTQRGHTITLSPNKASSNSSPLLTQEDQDML	59.898	59.898	AS(0.276)S(0.241)NS(0.241)S(0.241)PLLT(0.001)QEDQDMLR	AS(0.59)S(-0.59)NS(-0.59)S(-0.59)PLLT(-25.72)QEDQDMLR	2	2	-3.5091
BGIOSGA000406-PA	73.822	663	BGIOSGA000406-PA	547	pep chromosome:ASM465v1:1:41500597:41507320:-1 gene:BGIOSGA000406 transcript:BGIOSGA000406-TA gene-biotype:protein-coding transcript-biotype:protein-coding	BGIOSGA000406-PA	547	547	S	ISRSKSANGERSPIKSPVRSPTQRGHTITLS	93.839	78.548	SPIKS(1)PVR	S(-50.37)PIKS(50.37)PVR	5	2	-0.47222	75408000	45572000	83703000		40673000	23888000	26852000	13549000	19264000	33663000	15494000	25106000
BGIOSGA000406-PA	73.822	663	BGIOSGA000406-PA	615	pep chromosome:ASM465v1:1:41500597:41507320:-1 gene:BGIOSGA000406 transcript:BGIOSGA000406-TA gene-biotype:protein-coding transcript-biotype:protein-coding	BGIOSGA000406-PA	615	615	S	FETKSRHSKQSRLSKSNSHSPSSGNMKELLS	98.253	72.615	S(0.85)NS(0.151)HS(0.929)PS(0.031)S(0.039)GNMK	S(7.58)NS(-7.58)HS(13.89)PS(-14.83)S(-13.89)GNMK	1	2	-0.38666	11491000		28130000	16679000
BGIOSGA000406-PA	73.822	663	BGIOSGA000406-PA	315	pep chromosome:ASM465v1:1:41500597:41507320:-1 gene:BGIOSGA000406 transcript:BGIOSGA000406-TA gene-biotype:protein-coding transcript-biotype:protein-coding	BGIOSGA000406-PA	315	315	S	RFEQDYQRKQQEEDGSSVHQRGENLNILKQE	69.864	69.864	QQEEDGS(0.632)S(0.368)VHQR	QQEEDGS(2.34)S(-2.34)VHQR	7	2	0.50892												8113900
BGIOSGA000406-PA	73.822	663	BGIOSGA000406-PA	543	pep chromosome:ASM465v1:1:41500597:41507320:-1 gene:BGIOSGA000406 transcript:BGIOSGA000406-TA gene-biotype:protein-coding transcript-biotype:protein-coding	BGIOSGA000406-PA	543	543	S	LHHLISRSKSANGERSPIKSPVRSPTQRGHT	70.837	70.837	S(0.993)PIKS(0.017)PVRS(0.957)PT(0.033)QR	S(22.22)PIKS(-19.71)PVRS(14.76)PT(-14.76)QR	1	3	-0.18282		31123000		12602000			17206000	7053400	10405000	14577000	9474400	17272000
BGIOSGA000412-PA	55.388	498	BGIOSGA000412-PA	386	pep chromosome:ASM465v1:1:41448461:41451819:-1 gene:BGIOSGA000412 transcript:BGIOSGA000412-TA gene-biotype:protein-coding transcript-biotype:protein-coding	BGIOSGA000412-PA	386	386	S	ASSSSEVRSHISRLASIDSFDSRWQDFLEPG	68.44	68.44	LAS(0.999)IDS(0.001)FDSR	LAS(32.02)IDS(-32.02)FDS(-42.97)R	3	2	0.10641
BGIOSGA000426-PA	169.61	1532	BGIOSGA000426-PA	108	pep chromosome:ASM465v1:1:41189308:41199116:-1 gene:BGIOSGA000426 transcript:BGIOSGA000426-TA gene-biotype:protein-coding transcript-biotype:protein-coding description:DNA polymerase [Source:UniProtKB/TrEMBL;Acc:B8A6Y4]	BGIOSGA000426-PA	108	108	S	EDWTHRTIHSSSDEGSDGEDGAPRKRKQPRP	102.08	102.08	TIHSSSDEGS(0.999)DGEDGAPR	T(-78.03)IHS(-49.22)S(-33.51)S(-34.4)DEGS(33.51)DGEDGAPR	10	2	0.31397	3154100	8266300	32480000	3678700						11540000	4990500	10527000
BGIOSGA000426-PA	169.61	1532	BGIOSGA000426-PA	104	pep chromosome:ASM465v1:1:41189308:41199116:-1 gene:BGIOSGA000426 transcript:BGIOSGA000426-TA gene-biotype:protein-coding transcript-biotype:protein-coding description:DNA polymerase [Source:UniProtKB/TrEMBL;Acc:B8A6Y4]	BGIOSGA000426-PA	104	104	S	DGREEDWTHRTIHSSSDEGSDGEDGAPRKRK	87.388	87.388	TIHS(0.001)S(0.195)S(0.784)DEGS(0.02)DGEDGAPR	T(-68.66)IHS(-27.66)S(-6.04)S(6.04)DEGS(-16.03)DGEDGAPR	6	2	-0.024264
BGIOSGA000429-PA	28.904	259	BGIOSGA000429-PA	35	pep chromosome:ASM465v1:1:41134035:41136685:-1 gene:BGIOSGA000429 transcript:BGIOSGA000429-TA gene-biotype:protein-coding transcript-biotype:protein-coding	BGIOSGA000429-PA	35	35	T	DPEDPAKSPPRPSSPTTSTRKACCAVLQSWV	84.365	84.365	SPPRPS(0.31)S(0.31)PT(0.31)T(0.059)S(0.012)TR	S(-45.36)PPRPS(0)S(0)PT(0)T(-7.18)S(-14.28)T(-30.02)R	9	2	0.072668
BGIOSGA000429-PA	28.904	259	BGIOSGA000429-PA	33	pep chromosome:ASM465v1:1:41134035:41136685:-1 gene:BGIOSGA000429 transcript:BGIOSGA000429-TA gene-biotype:protein-coding transcript-biotype:protein-coding	BGIOSGA000429-PA	33	33	S	AVDPEDPAKSPPRPSSPTTSTRKACCAVLQS	113.54	79.875	SPPRPS(0.158)S(0.731)PT(0.092)T(0.016)S(0.003)T(0.001)R	S(-33.81)PPRPS(-6.66)S(6.66)PT(-8.99)T(-16.71)S(-24.15)T(-30.58)R	7	2	-0.11226							26409000	18801000		38878000	17248000
BGIOSGA000429-PA	28.904	259	BGIOSGA000429-PA	32	pep chromosome:ASM465v1:1:41134035:41136685:-1 gene:BGIOSGA000429 transcript:BGIOSGA000429-TA gene-biotype:protein-coding transcript-biotype:protein-coding	BGIOSGA000429-PA	32	32	S	EAVDPEDPAKSPPRPSSPTTSTRKACCAVLQ	102.73	102.73	SPPRPS(0.608)S(0.32)PT(0.07)T(0.002)STR	S(-56.66)PPRPS(2.79)S(-2.79)PT(-9.38)T(-24.84)S(-39.55)T(-45.62)R	6	2	0.24157						30569000
BGIOSGA000453-PA	52.623	494	BGIOSGA000453-PA	493	pep chromosome:ASM465v1:1:40607106:40612539:-1 gene:BGIOSGA000453 transcript:BGIOSGA000453-TA gene-biotype:protein-coding transcript-biotype:protein-coding	BGIOSGA000453-PA	493	493	S	AANQKNQTPKPPATGSP--------------	179.67	159.99	NQTPKPPAT(0.005)GS(0.995)P	NQT(-120.29)PKPPAT(-23.29)GS(23.29)P	11	2	0.63341		3399000	17451000	26321000	11543000	10465000	9146100	4456400	3807300	9884500	6203400	7881300
BGIOSGA000479-PA	37.272	346	BGIOSGA000479-PA	312	pep chromosome:ASM465v1:1:40175367:40179472:-1 gene:BGIOSGA000479 transcript:BGIOSGA000479-TA gene-biotype:protein-coding transcript-biotype:protein-coding	BGIOSGA000479-PA	312	312	S	EMSKDGNLEEQGANKSETSEPNSDNIESASG	63.724	63.724	DGNLEEQGANKS(0.661)ET(0.661)S(0.661)EPNS(0.017)DNIESASGSNPK	DGNLEEQGANKS(0)ET(0)S(0)EPNS(-17.68)DNIES(-46.2)AS(-53.2)GS(-55.92)NPK	12	3	1.8499
BGIOSGA000479-PA	37.272	346	BGIOSGA000479-PA	315	pep chromosome:ASM465v1:1:40175367:40179472:-1 gene:BGIOSGA000479 transcript:BGIOSGA000479-TA gene-biotype:protein-coding transcript-biotype:protein-coding	BGIOSGA000479-PA	315	315	S	KDGNLEEQGANKSETSEPNSDNIESASGSNP	101.86	63.724	DGNLEEQGANKS(0.661)ET(0.661)S(0.661)EPNS(0.017)DNIESASGSNPK	DGNLEEQGANKS(0)ET(0)S(0)EPNS(-17.68)DNIES(-46.2)AS(-53.2)GS(-55.92)NPK	15	3	1.8499
BGIOSGA000479-PA	37.272	346	BGIOSGA000479-PA	314	pep chromosome:ASM465v1:1:40175367:40179472:-1 gene:BGIOSGA000479 transcript:BGIOSGA000479-TA gene-biotype:protein-coding transcript-biotype:protein-coding	BGIOSGA000479-PA	314	314	T	SKDGNLEEQGANKSETSEPNSDNIESASGSN	101.86	63.724	DGNLEEQGANKS(0.661)ET(0.661)S(0.661)EPNS(0.017)DNIESASGSNPK	DGNLEEQGANKS(0)ET(0)S(0)EPNS(-17.68)DNIES(-46.2)AS(-53.2)GS(-55.92)NPK	14	3	1.8499
BGIOSGA000479-PA	37.272	346	BGIOSGA000479-PA	342	pep chromosome:ASM465v1:1:40175367:40179472:-1 gene:BGIOSGA000479 transcript:BGIOSGA000479-TA gene-biotype:protein-coding transcript-biotype:protein-coding	BGIOSGA000479-PA	342	342	S	GSNPKQNTPSLEGKESIKED-----------	73.156	73.156	QNTPS(0.003)LEGKES(0.997)IKED	QNT(-49.31)PS(-25.62)LEGKES(25.62)IKED	11	2	-0.68918
BGIOSGA000479-PA	37.272	346	BGIOSGA000479-PA	336	pep chromosome:ASM465v1:1:40175367:40179472:-1 gene:BGIOSGA000479 transcript:BGIOSGA000479-TA gene-biotype:protein-coding transcript-biotype:protein-coding	BGIOSGA000479-PA	336	336	S	NIESASGSNPKQNTPSLEGKESIKED-----	66.758	66.758	QNTPS(1)LEGK	QNT(-35.65)PS(35.65)LEGK	5	2	-0.55032					4120700				8137200
BGIOSGA000486-PA	28.411	272	BGIOSGA000486-PA	82	pep chromosome:ASM465v1:1:40069239:40072998:-1 gene:BGIOSGA000486 transcript:BGIOSGA000486-TA gene-biotype:protein-coding transcript-biotype:protein-coding	BGIOSGA000486-PA	82	82	S	SVALEDFISTCASVRSGAGASAGDADADGGG	96.096	96.096	S(1)GAGASAGDADADGGGR	S(48.46)GAGAS(-48.46)AGDADADGGGR	1	2	0.11487				4621800	9283600	8850000
BGIOSGA000486-PA	28.411	272	BGIOSGA000486-PA	58	pep chromosome:ASM465v1:1:40069239:40072998:-1 gene:BGIOSGA000486 transcript:BGIOSGA000486-TA gene-biotype:protein-coding transcript-biotype:protein-coding	BGIOSGA000486-PA	58	58	S	DEDKGSQRFSDAEDHSWRSHSRQGSVALEDF	93.623	84.352	FSDAEDHS(1)WR	FS(-61.13)DAEDHS(61.13)WR	8	2	-0.45648				10617000	27228000	3553800	11089000	5272900	6610700		2825000
BGIOSGA000537-PA	93.554	824	BGIOSGA000537-PA	62	pep chromosome:ASM465v1:1:39218094:39226729:-1 gene:BGIOSGA000537 transcript:BGIOSGA000537-TA gene-biotype:protein-coding transcript-biotype:protein-coding	BGIOSGA000537-PA	62	62	S	RWKNFLDSQAEYDESSGEDQDAKVSPSAEDE	112.82	112.82	NFLDSQAEYDES(0.169)S(0.831)GEDQDAK	NFLDS(-67.82)QAEY(-64.29)DES(-6.92)S(6.92)GEDQDAK	13	2	0.020701	11187000		11641000
BGIOSGA000537-PA	93.554	824	BGIOSGA000537-PA	155	pep chromosome:ASM465v1:1:39218094:39226729:-1 gene:BGIOSGA000537 transcript:BGIOSGA000537-TA gene-biotype:protein-coding transcript-biotype:protein-coding	BGIOSGA000537-PA	155	155	S	ELQSANNEEIKPSEDSDDEFYDVEKVDPNQE	57.841	57.841	QSSADKENAANELQS(0.009)ANNEEIKPS(0.297)EDS(0.693)DDEFY(0.002)DVEK	QS(-45.87)S(-43.03)ADKENAANELQS(-18.96)ANNEEIKPS(-3.69)EDS(3.69)DDEFY(-26.55)DVEK	27	4	-0.61501		15962000
BGIOSGA000537-PA	93.554	824	BGIOSGA000537-PA	710	pep chromosome:ASM465v1:1:39218094:39226729:-1 gene:BGIOSGA000537 transcript:BGIOSGA000537-TA gene-biotype:protein-coding transcript-biotype:protein-coding	BGIOSGA000537-PA	710	710	S	YQSSQQKAQLPSPSPSPRTPTRDASPGQVNQ	51.135	51.135	AQLPS(0.88)PS(0.217)PS(0.902)PR	AQLPS(8.16)PS(-8.16)PS(9.04)PR	9	2	1.0738										6124700	2187700
BGIOSGA000537-PA	93.554	824	BGIOSGA000537-PA	249	pep chromosome:ASM465v1:1:39218094:39226729:-1 gene:BGIOSGA000537 transcript:BGIOSGA000537-TA gene-biotype:protein-coding transcript-biotype:protein-coding	BGIOSGA000537-PA	249	249	S	LLAADDERENSKGSDSPTMEGKPKGSPFSSE	218.4	218.4	GSDS(1)PTMEGKPK	GS(-47.72)DS(47.72)PT(-66.09)MEGKPK	4	2	-0.30099	46623000	52391000	94760000	39153000	56926000	71867000	33906000	24643000	23930000	45344000	29607000
BGIOSGA000537-PA	93.554	824	BGIOSGA000537-PA	708	pep chromosome:ASM465v1:1:39218094:39226729:-1 gene:BGIOSGA000537 transcript:BGIOSGA000537-TA gene-biotype:protein-coding transcript-biotype:protein-coding	BGIOSGA000537-PA	708	708	S	LQYQSSQQKAQLPSPSPSPRTPTRDASPGQV	54.7	54.7	AQLPS(0.991)PS(0.66)PS(0.349)PR	AQLPS(18.42)PS(2.82)PS(-2.82)PR	7	2	-0.090729
BGIOSGA000537-PA	93.554	824	BGIOSGA000537-PA	61	pep chromosome:ASM465v1:1:39218094:39226729:-1 gene:BGIOSGA000537 transcript:BGIOSGA000537-TA gene-biotype:protein-coding transcript-biotype:protein-coding	BGIOSGA000537-PA	61	61	S	ERWKNFLDSQAEYDESSGEDQDAKVSPSAED	90.453	90.453	NFLDSQAEYDES(0.5)S(0.5)GEDQDAK	NFLDS(-41.12)QAEY(-37.95)DES(0)S(0)GEDQDAK	12	2	-0.87151
BGIOSGA000537-PA	93.554	824	BGIOSGA000537-PA	706	pep chromosome:ASM465v1:1:39218094:39226729:-1 gene:BGIOSGA000537 transcript:BGIOSGA000537-TA gene-biotype:protein-coding transcript-biotype:protein-coding	BGIOSGA000537-PA	706	706	S	ATLQYQSSQQKAQLPSPSPSPRTPTRDASPG	68.515	54.7	AQLPS(0.991)PS(0.66)PS(0.349)PR	AQLPS(18.42)PS(2.82)PS(-2.82)PR	5	2	-0.090729				9649900	9605300	5020800	3868500			6124700	10058000	9061200
BGIOSGA000540-PA	17.497	162	BGIOSGA000540-PA	11	pep chromosome:ASM465v1:1:39192989:39194409:-1 gene:BGIOSGA000540 transcript:BGIOSGA000540-TA gene-biotype:protein-coding transcript-biotype:protein-coding	BGIOSGA000540-PA	11	11	S	-----MADAGHDESGSPPRSGGVREQDRFLP	246.63	54.094	ADAGHDES(1)GS(1)PPR	ADAGHDES(54.09)GS(54.09)PPR	10	2	0.46059	395800000	438360000	558700000	385540000	338910000	401590000	312450000	140600000	174690000	298500000	192270000	242000000
BGIOSGA000540-PA	17.497	162	BGIOSGA000540-PA	9	pep chromosome:ASM465v1:1:39192989:39194409:-1 gene:BGIOSGA000540 transcript:BGIOSGA000540-TA gene-biotype:protein-coding transcript-biotype:protein-coding	BGIOSGA000540-PA	9	9	S	-------MADAGHDESGSPPRSGGVREQDRF	80.96	54.094	ADAGHDES(1)GS(1)PPR	ADAGHDES(54.09)GS(54.09)PPR	8	2	0.46059		6468100		7737300		1982800		4043700	1111500	8622200	2006200
BGIOSGA000543-PA	56.09	500	BGIOSGA000543-PA	461	pep chromosome:ASM465v1:1:39111719:39114237:-1 gene:BGIOSGA000543 transcript:BGIOSGA000543-TA gene-biotype:protein-coding transcript-biotype:protein-coding	BGIOSGA000543-PA	461	461	S	PERVPLVHSSIKKRLSFPVADKPNGEHADKL	46.818	46.818	RLS(1)FPVADKPNGEHADK	RLS(46.82)FPVADKPNGEHADK	3	3	0.46212
BGIOSGA000543-PA	56.09	500	BGIOSGA000543-PA	337	pep chromosome:ASM465v1:1:39111719:39114237:-1 gene:BGIOSGA000543 transcript:BGIOSGA000543-TA gene-biotype:protein-coding transcript-biotype:protein-coding	BGIOSGA000543-PA	337	337	S	NPSTSASRTYVPRAISIQRPATPNKSSRPPS	78.964	78.964	AIS(1)IQRPATPNK	AIS(42.52)IQRPAT(-42.52)PNK	3	2	-0.57419							5291800		6075200
BGIOSGA000543-PA	56.09	500	BGIOSGA000543-PA	130	pep chromosome:ASM465v1:1:39111719:39114237:-1 gene:BGIOSGA000543 transcript:BGIOSGA000543-TA gene-biotype:protein-coding transcript-biotype:protein-coding	BGIOSGA000543-PA	130	130	T	AAQAAAEVVRLTTATTAVPKSPVSSKDELAA	128.06	128.06	LTT(0.003)AT(0.184)T(0.79)AVPKS(0.023)PVS(0.001)SKDELAAIK	LT(-45.46)T(-24.94)AT(-6.33)T(6.33)AVPKS(-15.46)PVS(-31.94)S(-37.76)KDELAAIK	6	3	0.38078	75497000						53551000
BGIOSGA000543-PA	56.09	500	BGIOSGA000543-PA	343	pep chromosome:ASM465v1:1:39111719:39114237:-1 gene:BGIOSGA000543 transcript:BGIOSGA000543-TA gene-biotype:protein-coding transcript-biotype:protein-coding	BGIOSGA000543-PA	343	343	T	SRTYVPRAISIQRPATPNKSSRPPSRQSPST	147.26	126.5	AISIQRPAT(1)PNK	AIS(-76.02)IQRPAT(76.02)PNK	9	2	-0.2244						5483200	13688000	7798300	5572500	16492000	7353500	10166000
BGIOSGA000543-PA	56.09	500	BGIOSGA000543-PA	135	pep chromosome:ASM465v1:1:39111719:39114237:-1 gene:BGIOSGA000543 transcript:BGIOSGA000543-TA gene-biotype:protein-coding transcript-biotype:protein-coding	BGIOSGA000543-PA	135	135	S	AEVVRLTTATTAVPKSPVSSKDELAAIKIQT	181.86	127.3	S(1)PVSSKDELAAIK	S(42.36)PVS(-42.36)S(-52.72)KDELAAIK	1	2	0.42305	50097000	59938000	46954000	17257000	57200000	84376000		18977000	21038000	53703000	50144000	32442000
BGIOSGA000543-PA	56.09	500	BGIOSGA000543-PA	172	pep chromosome:ASM465v1:1:39111719:39114237:-1 gene:BGIOSGA000543 transcript:BGIOSGA000543-TA gene-biotype:protein-coding transcript-biotype:protein-coding	BGIOSGA000543-PA	172	172	S	ARRALRALRGLVRLKSLVDGNAVKRQTAHTL	100.31	51.162	S(1)LVDGNAVK	S(51.16)LVDGNAVK	1	2	0.46333	31686000	3604000		36823000	66571000	86346000	113650000	56831000	73765000	87356000	45618000	67377000
BGIOSGA000567-PA	60.569	559	BGIOSGA000567-PA	134	pep chromosome:ASM465v1:1:38732447:38736379:-1 gene:BGIOSGA000567 transcript:BGIOSGA000567-TA gene-biotype:protein-coding transcript-biotype:protein-coding	BGIOSGA000567-PA	134	134	T	RPIDAPPIFTPPATHTSQSYGSPRYEAGSLN	75.275	75.275	RPIDAPPIFTPPAT(0.121)HT(0.35)S(0.235)QS(0.16)Y(0.001)GS(0.133)PR	RPIDAPPIFT(-35.54)PPAT(-4.63)HT(1.73)S(-1.73)QS(-3.39)Y(-28.44)GS(-4.21)PR	16	3	-0.011852
BGIOSGA000567-PA	60.569	559	BGIOSGA000567-PA	140	pep chromosome:ASM465v1:1:38732447:38736379:-1 gene:BGIOSGA000567 transcript:BGIOSGA000567-TA gene-biotype:protein-coding transcript-biotype:protein-coding	BGIOSGA000567-PA	140	140	S	PIFTPPATHTSQSYGSPRYEAGSLNEIMSSD	62.487	62.487	RPIDAPPIFTPPAT(0.071)HT(0.17)S(0.105)QS(0.182)Y(0.009)GS(0.463)PR	RPIDAPPIFT(-31.01)PPAT(-8.16)HT(-4.35)S(-6.45)QS(-4.05)Y(-17.22)GS(4.05)PR	22	3	2.0269
BGIOSGA000587-PA	89.654	825	BGIOSGA000587-PA	744	pep chromosome:ASM465v1:1:38402336:38412116:-1 gene:BGIOSGA000587 transcript:BGIOSGA000587-TA gene-biotype:protein-coding transcript-biotype:protein-coding	BGIOSGA000587-PA	744	744	S	APAPKNASKSSDIKPSTSHNDDDDLWGSIAA	66.201	66.201	S(0.006)S(0.006)DIKPS(0.329)T(0.329)S(0.329)HNDDDDLWGSIAAPPPK	S(-17.5)S(-17.5)DIKPS(0)T(0)S(0)HNDDDDLWGS(-45.75)IAAPPPK	7	3	-0.098783
BGIOSGA000587-PA	89.654	825	BGIOSGA000587-PA	644	pep chromosome:ASM465v1:1:38402336:38412116:-1 gene:BGIOSGA000587 transcript:BGIOSGA000587-TA gene-biotype:protein-coding transcript-biotype:protein-coding	BGIOSGA000587-PA	644	644	S	YAPSTSSSLDQTAPASARSSVDGWGEIENDN	80.236	80.236	SSTVAYAPSTSSSLDQT(0.004)APAS(0.996)AR	S(-52.15)S(-52.15)T(-52.15)VAY(-69.45)APS(-55.83)T(-55.83)S(-46.06)S(-46.06)S(-46.06)LDQT(-24.16)APAS(24.16)AR	21	2	0.077407					6012900			7352300	11533000	9796300	8738500
BGIOSGA000587-PA	89.654	825	BGIOSGA000587-PA	640	pep chromosome:ASM465v1:1:38402336:38412116:-1 gene:BGIOSGA000587 transcript:BGIOSGA000587-TA gene-biotype:protein-coding transcript-biotype:protein-coding	BGIOSGA000587-PA	640	640	T	STVAYAPSTSSSLDQTAPASARSSVDGWGEI	54.103	54.103	SSTVAY(0.001)APS(0.037)T(0.037)S(0.037)S(0.037)S(0.037)LDQT(0.522)APAS(0.291)AR	S(-33.85)S(-33.85)T(-33.85)VAY(-30.17)APS(-11.47)T(-11.47)S(-11.47)S(-11.47)S(-11.47)LDQT(2.54)APAS(-2.54)AR	17	2	-0.21254											8403700
BGIOSGA000587-PA	89.654	825	BGIOSGA000587-PA	746	pep chromosome:ASM465v1:1:38402336:38412116:-1 gene:BGIOSGA000587 transcript:BGIOSGA000587-TA gene-biotype:protein-coding transcript-biotype:protein-coding	BGIOSGA000587-PA	746	746	S	APKNASKSSDIKPSTSHNDDDDLWGSIAAPP	66.201	66.201	S(0.006)S(0.006)DIKPS(0.329)T(0.329)S(0.329)HNDDDDLWGSIAAPPPK	S(-17.5)S(-17.5)DIKPS(0)T(0)S(0)HNDDDDLWGS(-45.75)IAAPPPK	9	3	-0.098783
BGIOSGA000587-PA	89.654	825	BGIOSGA000587-PA	269	pep chromosome:ASM465v1:1:38402336:38412116:-1 gene:BGIOSGA000587 transcript:BGIOSGA000587-TA gene-biotype:protein-coding transcript-biotype:protein-coding	BGIOSGA000587-PA	269	269	S	KSLLPDYQRLLSSAPSRRMNPSKLIDNSEFF	57.149	57.149	LLS(0.01)S(0.091)APS(0.898)RR	LLS(-19.45)S(-9.92)APS(9.92)RR	7	2	-1.1041					3843500					6885700	1928200	5373700
BGIOSGA000587-PA	89.654	825	BGIOSGA000587-PA	265	pep chromosome:ASM465v1:1:38402336:38412116:-1 gene:BGIOSGA000587 transcript:BGIOSGA000587-TA gene-biotype:protein-coding transcript-biotype:protein-coding	BGIOSGA000587-PA	265	265	S	ASIPKSLLPDYQRLLSSAPSRRMNPSKLIDN	70.028	70.028	LLS(0.885)S(0.115)APS(0.001)R	LLS(8.87)S(-8.87)APS(-32.44)R	3	2	-0.2617							2940800			6888500		8807400
BGIOSGA000587-PA	89.654	825	BGIOSGA000587-PA	745	pep chromosome:ASM465v1:1:38402336:38412116:-1 gene:BGIOSGA000587 transcript:BGIOSGA000587-TA gene-biotype:protein-coding transcript-biotype:protein-coding	BGIOSGA000587-PA	745	745	T	PAPKNASKSSDIKPSTSHNDDDDLWGSIAAP	66.201	66.201	S(0.006)S(0.006)DIKPS(0.329)T(0.329)S(0.329)HNDDDDLWGSIAAPPPK	S(-17.5)S(-17.5)DIKPS(0)T(0)S(0)HNDDDDLWGS(-45.75)IAAPPPK	8	3	-0.098783
BGIOSGA000597-PA	214.87	1941	BGIOSGA000597-PA	1798	pep chromosome:ASM465v1:1:38176473:38192930:-1 gene:BGIOSGA000597 transcript:BGIOSGA000597-TA gene-biotype:protein-coding transcript-biotype:protein-coding	BGIOSGA000597-PA	1798	1798	T	KNAAAGRTPSSLPLSTPPPIAPIPSPKFAPS	176.21	176.21	TPSSLPLS(0.03)T(0.969)PPPIAPIPSPK	T(-83.77)PS(-75.44)S(-72.55)LPLS(-15.02)T(15.02)PPPIAPIPS(-44.91)PK	9	2	-0.18577	26557000	33743000	16263000	75066000		44915000			26061000	56384000	32624000
BGIOSGA000597-PA	214.87	1941	BGIOSGA000597-PA	1797	pep chromosome:ASM465v1:1:38176473:38192930:-1 gene:BGIOSGA000597 transcript:BGIOSGA000597-TA gene-biotype:protein-coding transcript-biotype:protein-coding	BGIOSGA000597-PA	1797	1797	S	EKNAAAGRTPSSLPLSTPPPIAPIPSPKFAP	114.58	114.58	TPS(0.001)S(0.001)LPLS(0.806)T(0.192)PPPIAPIPSPK	T(-36.08)PS(-30.61)S(-29.4)LPLS(6.24)T(-6.24)PPPIAPIPS(-56.87)PK	8	2	-0.56914
BGIOSGA000597-PA	214.87	1941	BGIOSGA000597-PA	1813	pep chromosome:ASM465v1:1:38176473:38192930:-1 gene:BGIOSGA000597 transcript:BGIOSGA000597-TA gene-biotype:protein-coding transcript-biotype:protein-coding	BGIOSGA000597-PA	1813	1813	S	TPPPIAPIPSPKFAPSPVHTKSINNKTDCNE	99.568	99.568	FAPS(0.999)PVHT(0.001)K	FAPS(32.81)PVHT(-32.81)K	4	2	0.35199	82471000	100170000		79937000	83172000	61166000	93424000	35939000	46337000		63909000	63288000
BGIOSGA000603-PA	31.024	279	BGIOSGA000603-PA	136	pep chromosome:ASM465v1:1:38119189:38122103:-1 gene:BGIOSGA000603 transcript:BGIOSGA000603-TA gene-biotype:protein-coding transcript-biotype:protein-coding description:NADH-cytochrome b5 reductase [Source:UniProtKB/TrEMBL;Acc:A2WWB5]	BGIOSGA000603-PA	136	136	S	RMSHHFREMKVGDYMSVKGPKGRFRYQVGQV	55.084	55.084	VGDY(0.001)MS(0.999)VK	VGDY(-30.88)MS(30.88)VK	6	2	-0.70308
BGIOSGA000612-PA	48.586	447	BGIOSGA000612-PA	42	pep chromosome:ASM465v1:1:38005837:38008653:-1 gene:BGIOSGA000612 transcript:BGIOSGA000612-TA gene-biotype:protein-coding transcript-biotype:protein-coding	BGIOSGA000612-PA	42	42	S	VERHLVAQGDVEPEESPRLGPLRARLLVLTS	70.451	70.451	HLVAQGDVEPEES(1)PR	HLVAQGDVEPEES(70.45)PR	13	2	-0.0039415										6687100		7281900
BGIOSGA000653-PA	8.7998	89	BGIOSGA000653-PA	16	pep chromosome:ASM465v1:1:37156547:37156944:-1 gene:BGIOSGA000653 transcript:BGIOSGA000653-TA gene-biotype:protein-coding transcript-biotype:protein-coding	BGIOSGA000653-PA	16	16	S	MPAQKRPLQPADSDDSDGHVPVGRAASSRGG	91.238	87.748	RPLQPADS(0.005)DDS(0.995)DGHVPVGR	RPLQPADS(-23)DDS(23)DGHVPVGR	11	3	0.39512			36290000				11011000	3732300	7985900		5550300	7741300
BGIOSGA000653-PA	8.7998	89	BGIOSGA000653-PA	13	pep chromosome:ASM465v1:1:37156547:37156944:-1 gene:BGIOSGA000653 transcript:BGIOSGA000653-TA gene-biotype:protein-coding transcript-biotype:protein-coding	BGIOSGA000653-PA	13	13	S	---MPAQKRPLQPADSDDSDGHVPVGRAASS	151.23	130.16	RPLQPADS(1)DDSDGHVPVGR	RPLQPADS(44.28)DDS(-44.28)DGHVPVGR	8	3	0.099455	33337000	24065000	38401000		15101000	19094000	22850000	10507000		15803000	11856000
BGIOSGA000653-PA	8.7998	89	BGIOSGA000653-PA	39	pep chromosome:ASM465v1:1:37156547:37156944:-1 gene:BGIOSGA000653 transcript:BGIOSGA000653-TA gene-biotype:protein-coding transcript-biotype:protein-coding	BGIOSGA000653-PA	39	39	S	RAASSRGGGGGVSHESDGEDAARRAREPPRD	101.04	101.04	GGGGGVSHES(1)DGEDAAR	GGGGGVS(-44.17)HES(44.17)DGEDAAR	10	2	0.96823							11649000	7213700	8428500	14364000	8054900	14033000
BGIOSGA000654-PA	53.582	491	BGIOSGA000654-PA	326	pep chromosome:ASM465v1:1:37149529:37154218:-1 gene:BGIOSGA000654 transcript:BGIOSGA000654-TA gene-biotype:protein-coding transcript-biotype:protein-coding	BGIOSGA000654-PA	326	326	S	EENDELIGGKESFTTSPLRGEMLAWGKNGTR	108.31	108.31	ESFT(0.001)T(0.001)S(0.998)PLR	ES(-51.05)FT(-32.66)T(-29.24)S(29.24)PLR	6	2	-0.77235	2628600	39158000	49082000	43704000	20286000	24118000	17874000		10978000			19169000
BGIOSGA000654-PA	53.582	491	BGIOSGA000654-PA	257	pep chromosome:ASM465v1:1:37149529:37154218:-1 gene:BGIOSGA000654 transcript:BGIOSGA000654-TA gene-biotype:protein-coding transcript-biotype:protein-coding	BGIOSGA000654-PA	257	257	S	RGRGKTIAPDIAPTGSDNEDREEGNAIDTTK	54.703	54.703	TIAPDIAPT(0.18)GS(0.77)DNEDREEGNAIDT(0.023)T(0.027)K	T(-49.05)IAPDIAPT(-6.32)GS(6.32)DNEDREEGNAIDT(-15.23)T(-14.57)K	11	3	-0.45967	13782000	24019000	26459000			29103000				8361900
BGIOSGA000654-PA	53.582	491	BGIOSGA000654-PA	325	pep chromosome:ASM465v1:1:37149529:37154218:-1 gene:BGIOSGA000654 transcript:BGIOSGA000654-TA gene-biotype:protein-coding transcript-biotype:protein-coding	BGIOSGA000654-PA	325	325	T	FEENDELIGGKESFTTSPLRGEMLAWGKNGT	120.06	120.06	ESFT(0.139)T(0.57)S(0.291)PLR	ES(-53.14)FT(-6.14)T(2.93)S(-2.93)PLR	5	2	-0.16318	32258000						15434000			31943000	27376000	16724000
BGIOSGA000657-PA	12.756	115	BGIOSGA000657-PA;BGIOSGA020115-PA	57;155	pep chromosome:ASM465v1:1:37056640:37057465:-1 gene:BGIOSGA000657 transcript:BGIOSGA000657-TA gene-biotype:protein-coding transcript-biotype:protein-coding;pep chromosome:ASM465v1:5:26001582:26004629:1 gene:BGIOSGA020115 transcript:BGIOSGA020115-TA gene-bi	BGIOSGA000657-PA	57	57	S	GRKSLTTVQGLKKEYSYNKILKDLKKEFCCN	117.01	112.01	KEYS(1)YNK	KEY(-66.13)S(66.13)Y(-71.81)NK	4	2	0.014504				23379000	41345000	25740000	11693000	6444100	7684700	55893000	29897000	36463000
BGIOSGA000679-PA	93.913	870	BGIOSGA000679-PA	23	pep chromosome:ASM465v1:1:36824602:36829173:-1 gene:BGIOSGA000679 transcript:BGIOSGA000679-TA gene-biotype:protein-coding transcript-biotype:protein-coding	BGIOSGA000679-PA	23	23	S	PRGGGGGGAFSKRTLSGYMRIMSSGASTAAS	81.296	81.296	TLS(0.999)GYMR	T(-33.12)LS(33.12)GY(-38.3)MR	3	2	-0.38097							8355300	7745700	7944700
BGIOSGA000690-PA	35.22	329	BGIOSGA000690-PA	57	pep chromosome:ASM465v1:1:36581877:36584616:-1 gene:BGIOSGA000690 transcript:BGIOSGA000690-TA gene-biotype:protein-coding transcript-biotype:protein-coding	BGIOSGA000690-PA	57	57	S	TSPRYFFSSLAGTNASPHRRIAIAVDLSDES	79.62	79.62	YFFSSLAGT(0.002)NAS(0.998)PHR	Y(-68.34)FFS(-52.28)S(-52.89)LAGT(-26.76)NAS(26.76)PHR	12	3	-0.13829											20058000	40916000
BGIOSGA000690-PA	35.22	329	BGIOSGA000690-PA	43	pep chromosome:ASM465v1:1:36581877:36584616:-1 gene:BGIOSGA000690 transcript:BGIOSGA000690-TA gene-biotype:protein-coding transcript-biotype:protein-coding	BGIOSGA000690-PA	43	43	S	LAAAQAASAAAIHPTSPRYFFSSLAGTNASP	280.49	280.49	LAAAQAASAAAIHPT(0.161)S(0.839)PR	LAAAQAAS(-98.26)AAAIHPT(-7.17)S(7.17)PR	16	2	0.16567	503450000	383390000	374390000	535030000	390920000	30071000	1010500000	544580000	3292600	311930000	201510000	325370000
BGIOSGA000690-PA	35.22	329	BGIOSGA000690-PA	42	pep chromosome:ASM465v1:1:36581877:36584616:-1 gene:BGIOSGA000690 transcript:BGIOSGA000690-TA gene-biotype:protein-coding transcript-biotype:protein-coding	BGIOSGA000690-PA	42	42	T	RLAAAQAASAAAIHPTSPRYFFSSLAGTNAS	277.64	103.58	LAAAQAASAAAIHPT(0.895)S(0.105)PR	LAAAQAAS(-56.08)AAAIHPT(9.32)S(-9.32)PR	15	3	0.52038	24654000	21112000	160860000	235060000	178820000	271370000	426320000	257490000	21849000	163090000	7156000	180090000
BGIOSGA000704-PA	29.522	279	BGIOSGA000704-PA	185	pep chromosome:ASM465v1:1:36428698:36429537:-1 gene:BGIOSGA000704 transcript:BGIOSGA000704-TA gene-biotype:protein-coding transcript-biotype:protein-coding	BGIOSGA000704-PA	185	185	S	PPRREQRDRSVRRSPSPAAKRTPEQRRAASP	93.448	93.448	RS(0.001)PS(0.999)PAAK	RS(-28.76)PS(28.76)PAAK	4	2	0.58534			155740000	6874900	9490200	9267700	58126000	54869000		46115000	178020000	24448000
BGIOSGA000713-PA	8.9733	79	BGIOSGA000713-PA	28	pep chromosome:ASM465v1:1:36325320:36325559:-1 gene:BGIOSGA000713 transcript:BGIOSGA000713-TA gene-biotype:protein-coding transcript-biotype:protein-coding	BGIOSGA000713-PA	28	28	S	CEVKRRRAPPVARVGSPPPVPRREQPHQAQP	72.643	60.298	VGS(1)PPPVPR	VGS(60.3)PPPVPR	3	2	-0.021557			10812000	4833300	5557600	9474500					3940400
BGIOSGA000730-PA	62.079	550	BGIOSGA000730-PA	158	pep chromosome:ASM465v1:1:35970984:35975864:-1 gene:BGIOSGA000730 transcript:BGIOSGA000730-TA gene-biotype:protein-coding transcript-biotype:protein-coding	BGIOSGA000730-PA	158	158	S	NSCKSYLRCPNASSDSPKAQEILKEPASSEE	140.01	140.01	CPNAS(0.022)S(0.327)DS(0.652)PK	CPNAS(-14.78)S(-3)DS(3)PK	8	2	-0.10589										10189000		7895400
BGIOSGA000730-PA	62.079	550	BGIOSGA000730-PA	156	pep chromosome:ASM465v1:1:35970984:35975864:-1 gene:BGIOSGA000730 transcript:BGIOSGA000730-TA gene-biotype:protein-coding transcript-biotype:protein-coding	BGIOSGA000730-PA	156	156	S	FMNSCKSYLRCPNASSDSPKAQEILKEPASS	111.52	111.52	CPNAS(0.047)S(0.868)DS(0.084)PK	CPNAS(-12.63)S(10.14)DS(-10.14)PK	6	2	-0.049963											6356000
BGIOSGA000738-PA	125.23	1075	BGIOSGA000738-PA	1066	pep chromosome:ASM465v1:1:35857067:35873206:-1 gene:BGIOSGA000738 transcript:BGIOSGA000738-TA gene-biotype:protein-coding transcript-biotype:protein-coding	BGIOSGA000738-PA	1066	1066	S	DVTPKRSCLSNQNRNSFDKAVKIFN------	185.27	185.27	SCLSNQNRNS(1)FDK	S(-153.74)CLS(-100.97)NQNRNS(100.97)FDK	10	2	-0.34413	38993000	26323000	3874100	2297500			47193000	24840000	46960000	36364000	19533000	25197000
BGIOSGA000751-PA	113.62	987	BGIOSGA000751-PA	767	pep chromosome:ASM465v1:1:35653030:35657620:-1 gene:BGIOSGA000751 transcript:BGIOSGA000751-TA gene-biotype:protein-coding transcript-biotype:protein-coding	BGIOSGA000751-PA	767	767	S	SDINVKDNHHDNSHSSPKQRFGRKLDLSPVS	70.089	70.089	DNHHDNSHS(0.5)S(0.5)PK	DNHHDNS(-31.71)HS(0)S(0)PK	10	3	-0.22275
BGIOSGA000751-PA	113.62	987	BGIOSGA000751-PA	650	pep chromosome:ASM465v1:1:35653030:35657620:-1 gene:BGIOSGA000751 transcript:BGIOSGA000751-TA gene-biotype:protein-coding transcript-biotype:protein-coding	BGIOSGA000751-PA	650	650	S	EEFEQKKTKELEHINSQKEMINTKLEHVAVE	141.91	122.74	ELEHINS(1)QK	ELEHINS(122.74)QK	7	2	0.13303					2596700	5440600				30037000	15451000	32337000
BGIOSGA000751-PA	113.62	987	BGIOSGA000751-PA	848	pep chromosome:ASM465v1:1:35653030:35657620:-1 gene:BGIOSGA000751 transcript:BGIOSGA000751-TA gene-biotype:protein-coding transcript-biotype:protein-coding	BGIOSGA000751-PA	848	848	T	KVGQKRLNHLVSCDQTEVLEPKRKHRRSTIQ	71.354	53.169	LNHLVS(0.376)CDQT(0.624)EVLEPK	LNHLVS(-2.2)CDQT(2.2)EVLEPK	10	2	4.3369
BGIOSGA000751-PA	113.62	987	BGIOSGA000751-PA	895	pep chromosome:ASM465v1:1:35653030:35657620:-1 gene:BGIOSGA000751 transcript:BGIOSGA000751-TA gene-biotype:protein-coding transcript-biotype:protein-coding	BGIOSGA000751-PA	895	895	S	EKCSKNEHDEAPLGLSNTCKEHEYGDKGPEN	54.09	54.09	NEHDEAPLGLS(0.679)NT(0.321)CK	NEHDEAPLGLS(3.25)NT(-3.25)CK	11	2	0.15227
BGIOSGA000751-PA	113.62	987	BGIOSGA000751-PA	748	pep chromosome:ASM465v1:1:35653030:35657620:-1 gene:BGIOSGA000751 transcript:BGIOSGA000751-TA gene-biotype:protein-coding transcript-biotype:protein-coding	BGIOSGA000751-PA	748	748	S	IDSENKQLSLLQHDKSKLGSDINVKDNHHDN	132.79	132.79	QLSLLQHDKS(1)K	QLS(-67.56)LLQHDKS(67.56)K	10	2	0.76503										13705000	7249400
BGIOSGA000751-PA	113.62	987	BGIOSGA000751-PA	766	pep chromosome:ASM465v1:1:35653030:35657620:-1 gene:BGIOSGA000751 transcript:BGIOSGA000751-TA gene-biotype:protein-coding transcript-biotype:protein-coding	BGIOSGA000751-PA	766	766	S	GSDINVKDNHHDNSHSSPKQRFGRKLDLSPV	70.089	70.089	DNHHDNSHS(0.5)S(0.5)PK	DNHHDNS(-31.71)HS(0)S(0)PK	9	3	-0.22275
BGIOSGA000751-PA	113.62	987	BGIOSGA000751-PA	844	pep chromosome:ASM465v1:1:35653030:35657620:-1 gene:BGIOSGA000751 transcript:BGIOSGA000751-TA gene-biotype:protein-coding transcript-biotype:protein-coding	BGIOSGA000751-PA	844	844	S	LDFAKVGQKRLNHLVSCDQTEVLEPKRKHRR	170.5	164.2	LNHLVS(1)CDQTEVLEPK	LNHLVS(36.91)CDQT(-36.91)EVLEPK	6	2	0.4323	3908300	18702000		11949000				14237000	17632000	22683000	15504000	15176000
BGIOSGA000751-PA	113.62	987	BGIOSGA000751-PA	779	pep chromosome:ASM465v1:1:35653030:35657620:-1 gene:BGIOSGA000751 transcript:BGIOSGA000751-TA gene-biotype:protein-coding transcript-biotype:protein-coding	BGIOSGA000751-PA	779	779	S	SHSSPKQRFGRKLDLSPVSTPISWVRKCAQV	110.26	110.26	KLDLS(1)PVSTPISWVR	KLDLS(46.89)PVS(-46.89)T(-56.19)PIS(-73.79)WVR	5	2	-0.46044				41166000					20417000
BGIOSGA000752-PA	70.291	629	BGIOSGA000752-PA	554	pep chromosome:ASM465v1:1:35643922:35648210:-1 gene:BGIOSGA000752 transcript:BGIOSGA000752-TA gene-biotype:protein-coding transcript-biotype:protein-coding	BGIOSGA000752-PA	554	554	S	LVSLVEKQPKQQRVGSAPNLDSLAKESHPKK	98.582	77.185	VGS(1)APNLDSLAK	VGS(60.83)APNLDS(-60.83)LAK	3	2	-0.24287		8083300		18213000	38505000	21592000	10203000		3338700	34601000	19934000	5644400
BGIOSGA000752-PA	70.291	629	BGIOSGA000752-PA	534	pep chromosome:ASM465v1:1:35643922:35648210:-1 gene:BGIOSGA000752 transcript:BGIOSGA000752-TA gene-biotype:protein-coding transcript-biotype:protein-coding	BGIOSGA000752-PA	534	534	S	LGSAYEWVVTKKSGRSSEGDLVSLVEKQPKQ	66.004	66.004	S(0.608)S(0.392)EGDLVSLVEK	S(1.9)S(-1.9)EGDLVS(-44.63)LVEK	1	2	0.12296		13712000		5725900	7112400	26634000					14604000
BGIOSGA000752-PA	70.291	629	BGIOSGA000752-PA	535	pep chromosome:ASM465v1:1:35643922:35648210:-1 gene:BGIOSGA000752 transcript:BGIOSGA000752-TA gene-biotype:protein-coding transcript-biotype:protein-coding	BGIOSGA000752-PA	535	535	S	GSAYEWVVTKKSGRSSEGDLVSLVEKQPKQQ	48.467	48.467	S(0.5)S(0.5)EGDLVSLVEK	S(0)S(0)EGDLVS(-36.3)LVEK	2	2	1.0857						26634000
BGIOSGA000756-PA	23.551	225	BGIOSGA000756-PA	44	pep chromosome:ASM465v1:1:35573117:35573794:-1 gene:BGIOSGA000756 transcript:BGIOSGA000756-TA gene-biotype:protein-coding transcript-biotype:protein-coding	BGIOSGA000756-PA	44	44	T	CGQCKATAVSPPESPTGVGARSFSSSASSSA	74.786	74.786	AT(0.003)AVS(0.997)PPES(0.5)PT(0.5)GVGAR	AT(-24.73)AVS(24.73)PPES(0)PT(0)GVGAR	11	2	-0.77655				13697000							4266900
BGIOSGA000756-PA	23.551	225	BGIOSGA000756-PA	42	pep chromosome:ASM465v1:1:35573117:35573794:-1 gene:BGIOSGA000756 transcript:BGIOSGA000756-TA gene-biotype:protein-coding transcript-biotype:protein-coding	BGIOSGA000756-PA	42	42	S	LACGQCKATAVSPPESPTGVGARSFSSSASS	172.91	172.91	ATAVS(1)PPES(0.955)PT(0.045)GVGAR	AT(-57.6)AVS(57.6)PPES(13.22)PT(-13.22)GVGAR	9	2	0.24963	25189000	45989000	55175000	16852000		5925400					12665000
BGIOSGA000756-PA	23.551	225	BGIOSGA000756-PA	38	pep chromosome:ASM465v1:1:35573117:35573794:-1 gene:BGIOSGA000756 transcript:BGIOSGA000756-TA gene-biotype:protein-coding transcript-biotype:protein-coding	BGIOSGA000756-PA	38	38	S	LPSLLACGQCKATAVSPPESPTGVGARSFSS	192.32	192.32	ATAVS(1)PPESPTGVGAR	AT(-60.36)AVS(60.36)PPES(-82.76)PT(-116.16)GVGAR	5	2	-0.43338	45910000	73404000	95543000	16852000		5925400					12665000
BGIOSGA000766-PA	23.977	215	BGIOSGA000766-PA	12	pep chromosome:ASM465v1:1:35455088:35458564:-1 gene:BGIOSGA000766 transcript:BGIOSGA000766-TA gene-biotype:protein-coding transcript-biotype:protein-coding	BGIOSGA000766-PA	12	12	S	----MAPMKLYGSTLSWNVTRCVAVLEEAGA	154.1	154.1	LYGST(0.006)LS(0.994)WNVTR	LY(-117.42)GS(-39.38)T(-22.41)LS(22.41)WNVT(-35.34)R	7	2	0.23791				10439000						52285000	50278000	25287000
BGIOSGA000779-PA	62.326	574	BGIOSGA000779-PA	307	pep chromosome:ASM465v1:1:35315945:35318120:-1 gene:BGIOSGA000779 transcript:BGIOSGA000779-TA gene-biotype:protein-coding transcript-biotype:protein-coding	BGIOSGA000779-PA	307	307	S	NKACMIRNTKEDKSGSGGADGISDRGRLCTV	53.136	53.136	S(0.117)GS(0.883)GGADGISDR	S(-8.77)GS(8.77)GGADGIS(-44.09)DR	3	2	-2.255							5340500
BGIOSGA000780-PA	62.742	576	BGIOSGA000780-PA	175	pep chromosome:ASM465v1:1:35299367:35304568:-1 gene:BGIOSGA000780 transcript:BGIOSGA000780-TA gene-biotype:protein-coding transcript-biotype:protein-coding	BGIOSGA000780-PA	175	175	S	TLERNPDAFRPKIGSSPHANRNNMEAAGDLP	97.277	97.277	IGS(0.012)S(0.988)PHANR	IGS(-19.18)S(19.18)PHANR	4	2	-0.4871										14654000	5235700
BGIOSGA000783-PA	44.507	407	BGIOSGA000783-PA	66	pep chromosome:ASM465v1:1:35280740:35284886:-1 gene:BGIOSGA000783 transcript:BGIOSGA000783-TA gene-biotype:protein-coding transcript-biotype:protein-coding description:Aspartate aminotransferase [Source:UniProtKB/TrEMBL;Acc:A2WVA6]	BGIOSGA000783-PA	66	66	S	LNVVRRAEQMLINNPSRVKEYLPITGLADFN	119.32	46.704	RAEQMLINNPS(1)R	RAEQMLINNPS(46.7)R	11	2	1.1875	8932500	7424600		5217900	8467000	12708000				21328000	8288300	20513000
BGIOSGA000783-PA	44.507	407	BGIOSGA000783-PA	93	pep chromosome:ASM465v1:1:35280740:35284886:-1 gene:BGIOSGA000783 transcript:BGIOSGA000783-TA gene-biotype:protein-coding transcript-biotype:protein-coding description:Aspartate aminotransferase [Source:UniProtKB/TrEMBL;Acc:A2WVA6]	BGIOSGA000783-PA	93	93	S	ADFNKLSAKLIFGADSPAIQENRVATVQCLS	86.641	86.641	LIFGADS(1)PAIQENR	LIFGADS(86.64)PAIQENR	7	2	1.5009	10906000	15652000		10759000		12707000
BGIOSGA000791-PA	55.705	490	BGIOSGA000791-PA	71	pep chromosome:ASM465v1:1:35128407:35137331:-1 gene:BGIOSGA000791 transcript:BGIOSGA000791-TA gene-biotype:protein-coding transcript-biotype:protein-coding description:Phosphatidate cytidylyltransferase [Source:UniProtKB/TrEMBL;Acc:B8A9S4]	BGIOSGA000791-PA	71	71	S	ASAELDQIAAMERDTSSSDVSASHVGRARQR	106.58	106.58	DT(0.025)S(0.972)S(0.003)SDVSASHVGR	DT(-15.89)S(15.89)S(-25.83)S(-36.6)DVS(-62.76)AS(-75.67)HVGR	3	2	0.52554		9567400	10089000		8569000	2982900		8201800		9003600	5049700
BGIOSGA000791-PA	55.705	490	BGIOSGA000791-PA	76	pep chromosome:ASM465v1:1:35128407:35137331:-1 gene:BGIOSGA000791 transcript:BGIOSGA000791-TA gene-biotype:protein-coding transcript-biotype:protein-coding description:Phosphatidate cytidylyltransferase [Source:UniProtKB/TrEMBL;Acc:B8A9S4]	BGIOSGA000791-PA	76	76	S	DQIAAMERDTSSSDVSASHVGRARQRRRPTE	127.32	73.91	DT(0.001)S(0.004)S(0.003)S(0.003)DVS(0.836)AS(0.153)HVGR	DT(-31.7)S(-23.35)S(-23.98)S(-24.6)DVS(7.38)AS(-7.38)HVGR	8	2	0.3933		6011000	5805600							9824200		8102700
BGIOSGA000792-PA	85.026	748	BGIOSGA000792-PA	697	pep chromosome:ASM465v1:1:35107085:35111174:-1 gene:BGIOSGA000792 transcript:BGIOSGA000792-TA gene-biotype:protein-coding transcript-biotype:protein-coding	BGIOSGA000792-PA	697	697	S	QACTLKRIRDPGFHVSPRAHLSKDIMDSGKP	167.59	59.864	IRDPGFHVS(1)PR	IRDPGFHVS(59.86)PR	9	3	-0.046994	197060000	197560000	164360000	297470000	141540000	203320000	24391000	16943000	16759000	34650000	29173000	33780000
BGIOSGA000798-PA	44.029	413	BGIOSGA000798-PA	201	pep chromosome:ASM465v1:1:35061610:35063536:-1 gene:BGIOSGA000798 transcript:BGIOSGA000798-TA gene-biotype:protein-coding transcript-biotype:protein-coding	BGIOSGA000798-PA	201	201	S	KRVGTKGSPASAAAASPRSPSPSAAGAEDGE	127.3	127.3	GSPASAAAAS(1)PR	GS(-106.87)PAS(-45.66)AAAAS(45.66)PR	10	2	-0.4807	14474000	26103000	13978000	40109000	25901000	33153000	12671000	6959700	6371100		27213000	49526000
BGIOSGA000798-PA	44.029	413	BGIOSGA000798-PA	193	pep chromosome:ASM465v1:1:35061610:35063536:-1 gene:BGIOSGA000798 transcript:BGIOSGA000798-TA gene-biotype:protein-coding transcript-biotype:protein-coding	BGIOSGA000798-PA	193	193	S	QVALEEAKKRVGTKGSPASAAAASPRSPSPS	92.906	92.906	GS(0.999)PAS(0.001)AAAASPR	GS(31.86)PAS(-31.86)AAAAS(-85.26)PR	2	2	-0.086806		3890700		19905000	6823800	5957000				11274000	8304100
BGIOSGA000798-PA	44.029	413	BGIOSGA000798-PA	134	pep chromosome:ASM465v1:1:35061610:35063536:-1 gene:BGIOSGA000798 transcript:BGIOSGA000798-TA gene-biotype:protein-coding transcript-biotype:protein-coding	BGIOSGA000798-PA	134	134	S	VDRSSPKLADRHSPRSPLHEKKRAGTRVAEL	72.705	72.705	HS(0.027)PRS(0.973)PLHEK	HS(-15.6)PRS(15.6)PLHEK	5	3	-0.10921								2299500	3144600	12543000	5142600	8633000
BGIOSGA000798-PA	44.029	413	BGIOSGA000798-PA	123	pep chromosome:ASM465v1:1:35061610:35063536:-1 gene:BGIOSGA000798 transcript:BGIOSGA000798-TA gene-biotype:protein-coding transcript-biotype:protein-coding	BGIOSGA000798-PA	123	123	S	SDANGAHHRTVVDRSSPKLADRHSPRSPLHE	55.806	55.806	TVVDRS(0.5)S(0.5)PK	T(-44.45)VVDRS(0)S(0)PK	7	2	0.4429							13725000	9517800	9526100	21294000	10946000	27622000
BGIOSGA000798-PA	44.029	413	BGIOSGA000798-PA	122	pep chromosome:ASM465v1:1:35061610:35063536:-1 gene:BGIOSGA000798 transcript:BGIOSGA000798-TA gene-biotype:protein-coding transcript-biotype:protein-coding	BGIOSGA000798-PA	122	122	S	CSDANGAHHRTVVDRSSPKLADRHSPRSPLH	55.806	55.806	TVVDRS(0.5)S(0.5)PK	T(-44.45)VVDRS(0)S(0)PK	6	2	0.4429							13725000	9517800	9526100	21294000	10946000	27622000
BGIOSGA000798-PA	44.029	413	BGIOSGA000798-PA	131	pep chromosome:ASM465v1:1:35061610:35063536:-1 gene:BGIOSGA000798 transcript:BGIOSGA000798-TA gene-biotype:protein-coding transcript-biotype:protein-coding	BGIOSGA000798-PA	131	131	S	RTVVDRSSPKLADRHSPRSPLHEKKRAGTRV	91.658	57.149	LADRHS(1)PR	LADRHS(57.15)PR	6	3	-0.59592							6148000	6481700	5664600	26496000	8991800	16395000
BGIOSGA000809-PA	65.909	595	BGIOSGA000809-PA	228	pep chromosome:ASM465v1:1:34854793:34859267:-1 gene:BGIOSGA000809 transcript:BGIOSGA000809-TA gene-biotype:protein-coding transcript-biotype:protein-coding	BGIOSGA000809-PA	228	228	S	VQQYKDQTVQQPPSSSVPQQDRYVLSQAIVY	77.746	77.746	DQTVQQPPS(0.333)S(0.333)S(0.333)VPQQDR	DQT(-52.43)VQQPPS(0)S(0)S(0)VPQQDR	11	2	0.266
BGIOSGA000809-PA	65.909	595	BGIOSGA000809-PA	165	pep chromosome:ASM465v1:1:34854793:34859267:-1 gene:BGIOSGA000809 transcript:BGIOSGA000809-TA gene-biotype:protein-coding transcript-biotype:protein-coding	BGIOSGA000809-PA	165	165	S	ETQKELAKFQLTHDTSKKKEDMPTPSFPEQK	65.278	65.278	FQLT(0.007)HDT(0.234)S(0.759)K	FQLT(-20.26)HDT(-5.11)S(5.11)K	8	2	0.052983							7422700	765570	3811600	15401000	7751200	10352000
BGIOSGA000809-PA	65.909	595	BGIOSGA000809-PA	227	pep chromosome:ASM465v1:1:34854793:34859267:-1 gene:BGIOSGA000809 transcript:BGIOSGA000809-TA gene-biotype:protein-coding transcript-biotype:protein-coding	BGIOSGA000809-PA	227	227	S	PVQQYKDQTVQQPPSSSVPQQDRYVLSQAIV	77.746	77.746	DQTVQQPPS(0.333)S(0.333)S(0.333)VPQQDR	DQT(-52.43)VQQPPS(0)S(0)S(0)VPQQDR	10	2	0.266
BGIOSGA000809-PA	65.909	595	BGIOSGA000809-PA	226	pep chromosome:ASM465v1:1:34854793:34859267:-1 gene:BGIOSGA000809 transcript:BGIOSGA000809-TA gene-biotype:protein-coding transcript-biotype:protein-coding	BGIOSGA000809-PA	226	226	S	QPVQQYKDQTVQQPPSSSVPQQDRYVLSQAI	77.746	77.746	DQTVQQPPS(0.333)S(0.333)S(0.333)VPQQDR	DQT(-52.43)VQQPPS(0)S(0)S(0)VPQQDR	9	2	0.266
BGIOSGA000810-PA	140.26	1207	BGIOSGA000810-PA	1067	pep chromosome:ASM465v1:1:34845031:34851275:-1 gene:BGIOSGA000810 transcript:BGIOSGA000810-TA gene-biotype:protein-coding transcript-biotype:protein-coding	BGIOSGA000810-PA	1067	1067	S	GGLSQRPRRRLERGTSTVSQLFKGQEDGAAI	125.74	125.74	GTS(0.998)T(0.002)VSQLFK	GT(-53.42)S(26.17)T(-26.17)VS(-56.84)QLFK	3	2	0.10742	45488000	61407000	21976000	36494000	20251000	19836000			40787000		7380900
BGIOSGA000816-PA	19.161	166	BGIOSGA000816-PA	57	pep chromosome:ASM465v1:1:34761092:34764136:-1 gene:BGIOSGA000816 transcript:BGIOSGA000816-TA gene-biotype:protein-coding transcript-biotype:protein-coding	BGIOSGA000816-PA	57	57	S	KEEEEDDIEESEEEESEDESEGKAKHKGTEG	85.998	85.998	NLAEEEKEEEEDDIEES(0.006)EEEES(0.988)EDES(0.007)EGK	NLAEEEKEEEEDDIEES(-22.37)EEEES(21.78)EDES(-21.78)EGK	22	3	-0.14232
BGIOSGA000828-PA	44.484	386	BGIOSGA000828-PA	241	pep chromosome:ASM465v1:1:34516715:34519886:-1 gene:BGIOSGA000828 transcript:BGIOSGA000828-TA gene-biotype:protein-coding transcript-biotype:protein-coding	BGIOSGA000828-PA	241	241	S	MLKWRRKVREEKAVTSPGNACRYVAPEVLRN	108.43	108.43	AVT(0.01)S(0.99)PGNACR	AVT(-19.94)S(19.94)PGNACR	4	2	0.5118	65811000	65322000	71200000	253060000	219410000	212620000		52109000	44181000	272330000	167190000
BGIOSGA000828-PA	44.484	386	BGIOSGA000828-PA	240	pep chromosome:ASM465v1:1:34516715:34519886:-1 gene:BGIOSGA000828 transcript:BGIOSGA000828-TA gene-biotype:protein-coding transcript-biotype:protein-coding	BGIOSGA000828-PA	240	240	T	KMLKWRRKVREEKAVTSPGNACRYVAPEVLR	100.48	100.48	AVT(0.736)S(0.264)PGNACR	AVT(4.46)S(-4.46)PGNACR	3	2	-0.66404							75585000	5275200	3152900	8452800		256620000
BGIOSGA000836-PA	70.657	637	BGIOSGA000836-PA	276	pep chromosome:ASM465v1:1:34457764:34460770:-1 gene:BGIOSGA000836 transcript:BGIOSGA000836-TA gene-biotype:protein-coding transcript-biotype:protein-coding	BGIOSGA000836-PA	276	276	S	SSKRFSTPPPRRKPSSPPAPSRSPPHAFATA	74.524	74.524	KPS(0.149)S(0.851)PPAPSR	KPS(-7.57)S(7.57)PPAPS(-36.53)R	4	2	-0.44443					7096500					8280800
BGIOSGA000844-PA	75.352	671	BGIOSGA000844-PA	84	pep chromosome:ASM465v1:1:34320904:34325099:-1 gene:BGIOSGA000844 transcript:BGIOSGA000844-TA gene-biotype:protein-coding transcript-biotype:protein-coding	BGIOSGA000844-PA	84	84	S	GGGEKKMEGPDSGARSADKQAVEDEGNTTPV	68.25	68.25	S(0.999)ADKQAVEDEGNT(0.001)TPVPDTVQVGSSPK	S(32.63)ADKQAVEDEGNT(-32.63)T(-41.3)PVPDT(-62.72)VQVGS(-67.66)S(-67.89)PK	1	3	-0.31393		28610000	34531000		10896000				5114000		12186000	15274000
BGIOSGA000853-PA	73.397	687	BGIOSGA000853-PA	305	pep chromosome:ASM465v1:1:34149238:34154693:-1 gene:BGIOSGA000853 transcript:BGIOSGA000853-TA gene-biotype:protein-coding transcript-biotype:protein-coding	BGIOSGA000853-PA	305	305	S	YNPQAPNNQGKSPDQSISHKFQLLKSGSFCY	60.547	60.547	S(0.112)PDQS(0.535)IS(0.353)HK	S(-6.79)PDQS(1.8)IS(-1.8)HK	5	2	-0.11017
BGIOSGA000853-PA	73.397	687	BGIOSGA000853-PA	301	pep chromosome:ASM465v1:1:34149238:34154693:-1 gene:BGIOSGA000853 transcript:BGIOSGA000853-TA gene-biotype:protein-coding transcript-biotype:protein-coding	BGIOSGA000853-PA	301	301	S	KLSQYNPQAPNNQGKSPDQSISHKFQLLKSG	90.104	72.968	S(1)PDQSISHK	S(39.15)PDQS(-39.15)IS(-49.95)HK	1	2	0.51017		5815400		15066000	14377000	14625000
BGIOSGA000853-PA	73.397	687	BGIOSGA000853-PA	341	pep chromosome:ASM465v1:1:34149238:34154693:-1 gene:BGIOSGA000853 transcript:BGIOSGA000853-TA gene-biotype:protein-coding transcript-biotype:protein-coding	BGIOSGA000853-PA	341	341	S	LCCQFGNVKQSRTDGSDHHMNTPKGVVVDVF	40.624	40.624	T(0.003)DGS(0.982)DHHMNT(0.015)PK	T(-25.39)DGS(18.02)DHHMNT(-18.02)PK	4	3	0.31248										7960900
BGIOSGA000859-PA	69.077	639	BGIOSGA000859-PA;BGIOSGA020219-PA	56;60	pep chromosome:ASM465v1:1:34026282:34032033:-1 gene:BGIOSGA000859 transcript:BGIOSGA000859-TA gene-biotype:protein-coding transcript-biotype:protein-coding description:ATP-dependent 6-phosphofructokinase [Source:UniProtKB/TrEMBL;Acc:B8A9G5];pep chromosome:	BGIOSGA000859-PA;BGIOSGA020219-PA	56;60	56	S	AALPFSATCVRISRDSYPNLRALRNASSVSL;KALPFSATCVRISRDSYPNLRALRNASAMSL	199.15	125.89	ISRDS(1)YPNLR	IS(-50.15)RDS(50.15)Y(-64.8)PNLR	5	2	0.31151	17500000	39824000	13094000	45406000	40654000	33295000	18873000	7698800	7248900	19715000	12611000
BGIOSGA000859-PA	69.077	639	BGIOSGA000859-PA	67	pep chromosome:ASM465v1:1:34026282:34032033:-1 gene:BGIOSGA000859 transcript:BGIOSGA000859-TA gene-biotype:protein-coding transcript-biotype:protein-coding description:ATP-dependent 6-phosphofructokinase [Source:UniProtKB/TrEMBL;Acc:B8A9G5]	BGIOSGA000859-PA	67	67	S	ISRDSYPNLRALRNASAMSLPDDDAAYAKLE	76.145	76.145	NAS(0.999)AMS(0.001)LPDDDAAYAK	NAS(32.71)AMS(-32.71)LPDDDAAY(-71.79)AK	3	2	0.99667
BGIOSGA000859-PA	69.077	639	BGIOSGA000859-PA;BGIOSGA020219-PA	53;57	pep chromosome:ASM465v1:1:34026282:34032033:-1 gene:BGIOSGA000859 transcript:BGIOSGA000859-TA gene-biotype:protein-coding transcript-biotype:protein-coding description:ATP-dependent 6-phosphofructokinase [Source:UniProtKB/TrEMBL;Acc:B8A9G5];pep chromosome:	BGIOSGA000859-PA;BGIOSGA020219-PA	53;57	53	S	AVKAALPFSATCVRISRDSYPNLRALRNASS;PVAKALPFSATCVRISRDSYPNLRALRNASA	43.512	40.066	IS(0.629)RDS(0.356)Y(0.015)PNLR	IS(2.47)RDS(-2.47)Y(-16.32)PNLR	2	3	0.5223							8697200		3454200	12422000		7881200
BGIOSGA000862-PA	25.777	237	BGIOSGA000862-PA	134	pep chromosome:ASM465v1:1:33943757:33944470:-1 gene:BGIOSGA000862 transcript:BGIOSGA000862-TA gene-biotype:protein-coding transcript-biotype:protein-coding	BGIOSGA000862-PA	134	134	S	PTIQRHRLARPASPNSPCSSLRVAAAPGWSP	200.21	188.48	PASPNS(1)PCSSLR	PAS(-62.66)PNS(55.41)PCS(-55.41)S(-59.91)LR	6	2	0.42816	14037000	27243000	10428000	22336000	62648000	56251000	55934000	40258000	34433000	83602000	25272000	46578000
BGIOSGA000862-PA	25.777	237	BGIOSGA000862-PA	131	pep chromosome:ASM465v1:1:33943757:33944470:-1 gene:BGIOSGA000862 transcript:BGIOSGA000862-TA gene-biotype:protein-coding transcript-biotype:protein-coding	BGIOSGA000862-PA	131	131	S	TTIPTIQRHRLARPASPNSPCSSLRVAAAPG	145.58	145.58	PAS(1)PNS(1)PCSSLR	PAS(108.26)PNS(47.72)PCS(-47.72)S(-53.48)LR	3	2	-0.36215	14037000	25788000	10428000	26310000	69284000	51898000	41613000	28413000	24659000	63020000	15331000	32688000
BGIOSGA000862-PA	25.777	237	BGIOSGA000862-PA	165	pep chromosome:ASM465v1:1:33943757:33944470:-1 gene:BGIOSGA000862 transcript:BGIOSGA000862-TA gene-biotype:protein-coding transcript-biotype:protein-coding	BGIOSGA000862-PA	165	165	S	SSVLGLGASIKLRLPSLGRRCGRVLQRRLSC	79.974	71.349	LRLPS(1)LGR	LRLPS(71.35)LGR	5	2	0.060991									6238900
BGIOSGA000899-PA	36.04	332	BGIOSGA000899-PA	180	pep chromosome:ASM465v1:1:33324336:33326847:-1 gene:BGIOSGA000899 transcript:BGIOSGA000899-TA gene-biotype:protein-coding transcript-biotype:protein-coding	BGIOSGA000899-PA	180	180	S	EKQGEQDDAPTGEKDSKEGAANEEEEKEEDK	223.34	223.34	QGEQDDAPTGEKDS(1)K	QGEQDDAPT(-55.42)GEKDS(55.42)K	14	2	-0.7064	16088000	23422000	21408000		4180700	14300000	79435000	60751000	59461000	103810000	76979000	75107000
BGIOSGA000906-PA	38.763	351	BGIOSGA000906-PA	243	pep chromosome:ASM465v1:1:33178537:33179592:-1 gene:BGIOSGA000906 transcript:BGIOSGA000906-TA gene-biotype:protein-coding transcript-biotype:protein-coding	BGIOSGA000906-PA	243	243	S	AEYVLGGCENAGTRDSGSGAELGEEQPNEAG	70.783	70.783	DS(0.5)GS(0.5)GAELGEEQPNEAGAGK	DS(0)GS(0)GAELGEEQPNEAGAGK	2	2	-1.9054
BGIOSGA000906-PA	38.763	351	BGIOSGA000906-PA	245	pep chromosome:ASM465v1:1:33178537:33179592:-1 gene:BGIOSGA000906 transcript:BGIOSGA000906-TA gene-biotype:protein-coding transcript-biotype:protein-coding	BGIOSGA000906-PA	245	245	S	YVLGGCENAGTRDSGSGAELGEEQPNEAGAG	70.783	70.783	DS(0.5)GS(0.5)GAELGEEQPNEAGAGK	DS(0)GS(0)GAELGEEQPNEAGAGK	4	2	-1.9054
BGIOSGA000937-PA	48.065	440	BGIOSGA000937-PA	226	pep chromosome:ASM465v1:1:32674705:32676818:-1 gene:BGIOSGA000937 transcript:BGIOSGA000937-TA gene-biotype:protein-coding transcript-biotype:protein-coding	BGIOSGA000937-PA	226	226	S	AQSHQRCSNHGGRPSSPAVSLKHHGNGATRS	50.916	50.916	CS(0.004)NHGGRPS(0.497)S(0.497)PAVS(0.001)LK	CS(-20.73)NHGGRPS(0)S(0)PAVS(-26.41)LK	10	3	-0.015743
BGIOSGA000937-PA	48.065	440	BGIOSGA000937-PA	213	pep chromosome:ASM465v1:1:32674705:32676818:-1 gene:BGIOSGA000937 transcript:BGIOSGA000937-TA gene-biotype:protein-coding transcript-biotype:protein-coding	BGIOSGA000937-PA	213	213	S	HEGAIKRERALTYAQSHQRCSNHGGRPSSPA	71.555	71.555	ALTYAQS(1)HQR	ALT(-47.26)Y(-38.66)AQS(38.66)HQR	7	2	-0.6733							6033800		2268600
BGIOSGA000937-PA	48.065	440	BGIOSGA000937-PA	225	pep chromosome:ASM465v1:1:32674705:32676818:-1 gene:BGIOSGA000937 transcript:BGIOSGA000937-TA gene-biotype:protein-coding transcript-biotype:protein-coding	BGIOSGA000937-PA	225	225	S	YAQSHQRCSNHGGRPSSPAVSLKHHGNGATR	50.916	50.916	CS(0.004)NHGGRPS(0.497)S(0.497)PAVS(0.001)LK	CS(-20.73)NHGGRPS(0)S(0)PAVS(-26.41)LK	9	3	-0.015743
BGIOSGA000937-PA	48.065	440	BGIOSGA000937-PA	384	pep chromosome:ASM465v1:1:32674705:32676818:-1 gene:BGIOSGA000937 transcript:BGIOSGA000937-TA gene-biotype:protein-coding transcript-biotype:protein-coding	BGIOSGA000937-PA	384	384	S	LSGYGSHKPPLQRQRSGDLLHHNRMAFSSID	63.408	40.724	S(1)GDLLHHNR	S(40.72)GDLLHHNR	1	3	-0.0081988
BGIOSGA000977-PA	136.1	1234	BGIOSGA000977-PA	649	pep chromosome:ASM465v1:1:32002289:32016406:-1 gene:BGIOSGA000977 transcript:BGIOSGA000977-TA gene-biotype:protein-coding transcript-biotype:protein-coding	BGIOSGA000977-PA	649	649	T	VELEVDPFSPVLKASTPEDTTNHDLPVLPSH	102.51	102.51	AS(0.125)T(0.873)PEDT(0.001)T(0.001)NHDLPVLPSHLELSDDEK	AS(-8.43)T(8.43)PEDT(-31.53)T(-31.53)NHDLPVLPS(-71.56)HLELS(-91.7)DDEK	3	3	-0.42979	78235000	74061000		66170000
BGIOSGA000977-PA	136.1	1234	BGIOSGA000977-PA	648	pep chromosome:ASM465v1:1:32002289:32016406:-1 gene:BGIOSGA000977 transcript:BGIOSGA000977-TA gene-biotype:protein-coding transcript-biotype:protein-coding	BGIOSGA000977-PA	648	648	S	SVELEVDPFSPVLKASTPEDTTNHDLPVLPS	84.674	84.674	AS(0.529)T(0.469)PEDT(0.001)TNHDLPVLPSHLELSDDEK	AS(0.52)T(-0.52)PEDT(-27.46)T(-32.13)NHDLPVLPS(-58.99)HLELS(-73.15)DDEK	2	3	-1.1071			64633000
BGIOSGA000995-PA	75.337	697	BGIOSGA000995-PA	678	pep chromosome:ASM465v1:1:31787822:31792766:-1 gene:BGIOSGA000995 transcript:BGIOSGA000995-TA gene-biotype:protein-coding transcript-biotype:protein-coding	BGIOSGA000995-PA	678	678	S	EKDGGKDKKGPDPPLSPDTVHAQWDSRQTTP	69.133	58.952	KGPDPPLS(0.977)PDT(0.023)VHAQWDSR	KGPDPPLS(16.21)PDT(-16.21)VHAQWDS(-46.08)R	8	3	-0.87849				11189000
BGIOSGA001004-PA	34.932	319	BGIOSGA001004-PA	250	pep chromosome:ASM465v1:1:31651653:31654973:-1 gene:BGIOSGA001004 transcript:BGIOSGA001004-TA gene-biotype:protein-coding transcript-biotype:protein-coding	BGIOSGA001004-PA	250	250	S	VEDTGKYQAAPQSPSSPAGSAVMHAATKSNM	104.5	76.777	YQAAPQS(0.054)PS(0.179)S(0.765)PAGS(0.002)AVMHAATK	Y(-45.51)QAAPQS(-11.5)PS(-6.31)S(6.31)PAGS(-24.92)AVMHAAT(-44.74)K	10	3	-0.044054						24332000
BGIOSGA001004-PA	34.932	319	BGIOSGA001004-PA	233	pep chromosome:ASM465v1:1:31651653:31654973:-1 gene:BGIOSGA001004 transcript:BGIOSGA001004-TA gene-biotype:protein-coding transcript-biotype:protein-coding	BGIOSGA001004-PA	233	233	S	SPVASISRDMPSLSISPVEDTGKYQAAPQSP	67.646	67.646	DMPS(0.001)LS(0.013)IS(0.983)PVEDT(0.003)GK	DMPS(-29.88)LS(-18.75)IS(18.75)PVEDT(-24.7)GK	8	2	1.1289	9441500	21369000		11736000
BGIOSGA001004-PA	34.932	319	BGIOSGA001004-PA	247	pep chromosome:ASM465v1:1:31651653:31654973:-1 gene:BGIOSGA001004 transcript:BGIOSGA001004-TA gene-biotype:protein-coding transcript-biotype:protein-coding	BGIOSGA001004-PA	247	247	S	ISPVEDTGKYQAAPQSPSSPAGSAVMHAATK	109.08	92.924	YQAAPQS(0.981)PS(0.019)S(0.001)PAGSAVMHAATK	Y(-46.37)QAAPQS(17.23)PS(-17.23)S(-30.35)PAGS(-54.34)AVMHAAT(-65.78)K	7	3	-0.67559		21535000	27851000	24113000	4570500					49091000	27132000	46273000
BGIOSGA001004-PA	34.932	319	BGIOSGA001004-PA	282	pep chromosome:ASM465v1:1:31651653:31654973:-1 gene:BGIOSGA001004 transcript:BGIOSGA001004-TA gene-biotype:protein-coding transcript-biotype:protein-coding	BGIOSGA001004-PA	282	282	T	SQEHHRSPADEISCATPSSSDVLEKARAAIA	75.548	75.548	SPADEIS(0.274)CAT(0.679)PS(0.031)S(0.008)S(0.008)DVLEK	S(-53.87)PADEIS(-3.95)CAT(3.95)PS(-13.35)S(-19.43)S(-19.43)DVLEK	10	2	3.8375
BGIOSGA001004-PA	34.932	319	BGIOSGA001004-PA	249	pep chromosome:ASM465v1:1:31651653:31654973:-1 gene:BGIOSGA001004 transcript:BGIOSGA001004-TA gene-biotype:protein-coding transcript-biotype:protein-coding	BGIOSGA001004-PA	249	249	S	PVEDTGKYQAAPQSPSSPAGSAVMHAATKSN	104.5	52.898	Y(0.001)QAAPQS(0.494)PS(0.494)S(0.009)PAGSAVMHAATK	Y(-25.34)QAAPQS(0)PS(0)S(-17.24)PAGS(-30.01)AVMHAAT(-43.33)K	9	3	-0.79409
BGIOSGA001004-PA	34.932	319	BGIOSGA001004-PA	273	pep chromosome:ASM465v1:1:31651653:31654973:-1 gene:BGIOSGA001004 transcript:BGIOSGA001004-TA gene-biotype:protein-coding transcript-biotype:protein-coding	BGIOSGA001004-PA	273	273	S	HAATKSNMVSQEHHRSPADEISCATPSSSDV	51.798	51.798	S(0.998)PADEIS(0.002)CATPSSSDVLEK	S(27.38)PADEIS(-27.38)CAT(-36.41)PS(-40.43)S(-40.43)S(-40.43)DVLEK	1	2	1.2553
BGIOSGA001019-PA	63.355	568	BGIOSGA001019-PA	333	pep chromosome:ASM465v1:1:31322923:31331342:-1 gene:BGIOSGA001019 transcript:BGIOSGA001019-TA gene-biotype:protein-coding transcript-biotype:protein-coding	BGIOSGA001019-PA	333	333	S	EGAEFRPRRFVNRTISLDDVKNIKNAVGCTV	91.701	74.53	T(0.5)IS(0.5)LDDVKNIK	T(0)IS(0)LDDVKNIK	3	2	0.22959										183420000	68093000	102910000
BGIOSGA001034-PA	88.801	801	BGIOSGA001034-PA	356	pep chromosome:ASM465v1:1:30973907:30981009:-1 gene:BGIOSGA001034 transcript:BGIOSGA001034-TA gene-biotype:protein-coding transcript-biotype:protein-coding	BGIOSGA001034-PA	356	356	S	RSQRRGVAEEPRGASSSPEHPLMKTRARSIL	170.4	170.4	GASS(0.941)S(0.058)PEHPLMK	GAS(-33.4)S(12.07)S(-12.07)PEHPLMK	4	2	-0.20995			23135000			15284000
BGIOSGA001034-PA	88.801	801	BGIOSGA001034-PA	357	pep chromosome:ASM465v1:1:30973907:30981009:-1 gene:BGIOSGA001034 transcript:BGIOSGA001034-TA gene-biotype:protein-coding transcript-biotype:protein-coding	BGIOSGA001034-PA	357	357	S	SQRRGVAEEPRGASSSPEHPLMKTRARSILG	118.31	80.245	GAS(0.001)S(0.139)S(0.86)PEHPLMK	GAS(-29.18)S(-7.9)S(7.9)PEHPLMK	5	2	-1.3161	14500000			18679000							4973000
BGIOSGA001034-PA	88.801	801	BGIOSGA001034-PA	491	pep chromosome:ASM465v1:1:30973907:30981009:-1 gene:BGIOSGA001034 transcript:BGIOSGA001034-TA gene-biotype:protein-coding transcript-biotype:protein-coding	BGIOSGA001034-PA	491	491	S	RNRNGSTQKAMSLPSSPHEYRAQISETINPC	76.522	76.522	AMS(0.002)LPS(0.134)S(0.864)PHEYR	AMS(-26.59)LPS(-8.08)S(8.08)PHEY(-37.5)R	7	2	-1.553			5140500	17058000	3207700					1941900
BGIOSGA001034-PA	88.801	801	BGIOSGA001034-PA	487	pep chromosome:ASM465v1:1:30973907:30981009:-1 gene:BGIOSGA001034 transcript:BGIOSGA001034-TA gene-biotype:protein-coding transcript-biotype:protein-coding	BGIOSGA001034-PA	487	487	S	NNGPRNRNGSTQKAMSLPSSPHEYRAQISET	81.565	72.815	AMS(1)LPS(0.309)S(0.691)PHEYR	AMS(46.27)LPS(-3.5)S(3.5)PHEY(-46.83)R	3	2	-0.32257				8060700
BGIOSGA001035-PA	36.018	332	BGIOSGA001035-PA	20	pep chromosome:ASM465v1:1:30971457:30972455:-1 gene:BGIOSGA001035 transcript:BGIOSGA001035-TA gene-biotype:protein-coding transcript-biotype:protein-coding	BGIOSGA001035-PA	20	20	S	PPPPNPNLPYREDCWSDGETAALVDAWGRRY	123.4	123.4	EDCWS(1)DGETAALVDAWGR	EDCWS(49.93)DGET(-49.93)AALVDAWGR	5	2	0.046275
BGIOSGA001035-PA	36.018	332	BGIOSGA001035-PA	145	pep chromosome:ASM465v1:1:30971457:30972455:-1 gene:BGIOSGA001035 transcript:BGIOSGA001035-TA gene-biotype:protein-coding transcript-biotype:protein-coding	BGIOSGA001035-PA	145	145	S	RGLPMMRRRLESPSRSPSPPSPTPAVALPLP	49.707	49.707	LES(0.241)PS(0.281)RS(0.625)PS(0.743)PPS(0.105)PT(0.005)PAVALPLPNYR	LES(-5.91)PS(-4.94)RS(4.94)PS(9.16)PPS(-9.22)PT(-23.88)PAVALPLPNY(-48.82)R	7	3	-0.42731	18046000	20350000
BGIOSGA001035-PA	36.018	332	BGIOSGA001035-PA	147	pep chromosome:ASM465v1:1:30971457:30972455:-1 gene:BGIOSGA001035 transcript:BGIOSGA001035-TA gene-biotype:protein-coding transcript-biotype:protein-coding	BGIOSGA001035-PA	147	147	S	LPMMRRRLESPSRSPSPPSPTPAVALPLPNY	49.707	49.707	LES(0.241)PS(0.281)RS(0.625)PS(0.743)PPS(0.105)PT(0.005)PAVALPLPNYR	LES(-5.91)PS(-4.94)RS(4.94)PS(9.16)PPS(-9.22)PT(-23.88)PAVALPLPNY(-48.82)R	9	3	-0.42731	18046000	20350000
BGIOSGA001037-PA	15.896	142	BGIOSGA001037-PA	17	pep chromosome:ASM465v1:1:30937138:30942279:-1 gene:BGIOSGA001037 transcript:BGIOSGA001037-TA gene-biotype:protein-coding transcript-biotype:protein-coding	BGIOSGA001037-PA	17	17	S	ETQRLLSEPAPGISASPSEENMRYFNVMILG	153.21	153.21	LLSEPAPGIS(0.01)AS(0.895)PS(0.095)EENMR	LLS(-87.19)EPAPGIS(-19.35)AS(9.75)PS(-9.75)EENMR	12	2	0.96892	6732300	22718000	7886400	17302000	28457000	22735000		13317000	11888000	45607000	20700000	41376000
BGIOSGA001037-PA	15.896	142	BGIOSGA001037-PA	8	pep chromosome:ASM465v1:1:30937138:30942279:-1 gene:BGIOSGA001037 transcript:BGIOSGA001037-TA gene-biotype:protein-coding transcript-biotype:protein-coding	BGIOSGA001037-PA	8	8	S	--------METQRLLSEPAPGISASPSEENM	100.77	100.77	LLS(1)EPAPGISASPSEENMR	LLS(79.52)EPAPGIS(-79.52)AS(-88.35)PS(-92.17)EENMR	3	2	0.35233									23626000		15587000
BGIOSGA001042-PA	198.01	1705	BGIOSGA001042-PA	1029	pep chromosome:ASM465v1:1:30872163:30878007:-1 gene:BGIOSGA001042 transcript:BGIOSGA001042-TA gene-biotype:protein-coding transcript-biotype:protein-coding	BGIOSGA001042-PA	1029	1029	S	GSSRREVGSDGSGYYSRTSSSRALSRASSSV	62.088	51.211	EVGSDGS(0.028)GYYS(0.972)R	EVGS(-36.95)DGS(-15.47)GY(-34.37)Y(-34.37)S(15.47)R	11	2	-2.3922
BGIOSGA001042-PA	198.01	1705	BGIOSGA001042-PA	1042	pep chromosome:ASM465v1:1:30872163:30878007:-1 gene:BGIOSGA001042 transcript:BGIOSGA001042-TA gene-biotype:protein-coding transcript-biotype:protein-coding	BGIOSGA001042-PA	1042	1042	S	YYSRTSSSRALSRASSSVSTLFKGSEYGTVL	103.08	103.08	ASS(0.986)S(0.014)VSTLFK	AS(-41.74)S(18.58)S(-18.58)VS(-39.68)T(-47.68)LFK	3	2	0.60563	14031000	4528300	6715600		62014000	71614000	81274000	38010000		61166000	4582400	74627000
BGIOSGA001042-PA	198.01	1705	BGIOSGA001042-PA	1022	pep chromosome:ASM465v1:1:30872163:30878007:-1 gene:BGIOSGA001042 transcript:BGIOSGA001042-TA gene-biotype:protein-coding transcript-biotype:protein-coding	BGIOSGA001042-PA	1022	1022	S	TMGSSRIGSSRREVGSDGSGYYSRTSSSRAL	71.548	71.548	EVGS(0.997)DGS(0.003)GYYSR	EVGS(25.76)DGS(-25.76)GY(-60.45)Y(-63.74)S(-44.92)R	4	2	-1.2694	6214100						3716700			9279900	5574500	8580300
BGIOSGA001042-PA	198.01	1705	BGIOSGA001042-PA	1025	pep chromosome:ASM465v1:1:30872163:30878007:-1 gene:BGIOSGA001042 transcript:BGIOSGA001042-TA gene-biotype:protein-coding transcript-biotype:protein-coding	BGIOSGA001042-PA	1025	1025	S	SSRIGSSRREVGSDGSGYYSRTSSSRALSRA	100.22	100.22	EVGS(0.001)DGS(0.998)GYYS(0.001)R	EVGS(-29.05)DGS(29.05)GY(-57.89)Y(-64.68)S(-29.05)R	7	2	1.4431	12452000	12761000			16024000			3081000	3841000
BGIOSGA001042-PA	198.01	1705	BGIOSGA001042-PA	1011	pep chromosome:ASM465v1:1:30872163:30878007:-1 gene:BGIOSGA001042 transcript:BGIOSGA001042-TA gene-biotype:protein-coding transcript-biotype:protein-coding	BGIOSGA001042-PA	1011	1011	S	HDLRTGSRELATMGSSRIGSSRREVGSDGSG	118.9	53.08	ELAT(0.007)MGS(0.377)S(0.616)R	ELAT(-19.19)MGS(-2.13)S(2.13)R	8	2	0.4404				2112400
BGIOSGA001042-PA	198.01	1705	BGIOSGA001042-PA	1010	pep chromosome:ASM465v1:1:30872163:30878007:-1 gene:BGIOSGA001042 transcript:BGIOSGA001042-TA gene-biotype:protein-coding transcript-biotype:protein-coding	BGIOSGA001042-PA	1010	1010	S	EHDLRTGSRELATMGSSRIGSSRREVGSDGS	143	143	ELATMGS(0.924)S(0.076)R	ELAT(-48.69)MGS(10.82)S(-10.82)R	7	2	-0.22195	99735000	91413000	83609000	93997000	75451000	78162000	112720000	46925000	34373000		31063000
BGIOSGA001056-PA	30.493	263	BGIOSGA001056-PA;BGIOSGA001053-PA	243;245	pep chromosome:ASM465v1:1:30626918:30627767:-1 gene:BGIOSGA001056 transcript:BGIOSGA001056-TA gene-biotype:protein-coding transcript-biotype:protein-coding;pep chromosome:ASM465v1:1:30657297:30658152:-1 gene:BGIOSGA001053 transcript:BGIOSGA001053-TA gene-b	BGIOSGA001056-PA	243	243	S	HGGSPPRRARSPVRESSEERRAKIEQWNRER	71.286	58.164	ARS(1)PVRES(0.95)S(0.05)EER	ARS(46.99)PVRES(12.82)S(-12.82)EER	8	3	-0.8515				66020000		28276000	58670000	19047000	35239000	36935000	16881000
BGIOSGA001056-PA	30.493	263	BGIOSGA001056-PA;BGIOSGA001053-PA	238;240	pep chromosome:ASM465v1:1:30626918:30627767:-1 gene:BGIOSGA001056 transcript:BGIOSGA001056-TA gene-biotype:protein-coding transcript-biotype:protein-coding;pep chromosome:ASM465v1:1:30657297:30658152:-1 gene:BGIOSGA001053 transcript:BGIOSGA001053-TA gene-b	BGIOSGA001056-PA	238	238	S	GGRRRHGGSPPRRARSPVRESSEERRAKIEQ	74.789	71.286	ARS(1)PVRES(0.681)S(0.319)EER	ARS(53.33)PVRES(3.29)S(-3.29)EER	3	3	-0.3501				66020000		28276000	58670000	19047000	35239000	36935000	16881000
BGIOSGA001072-PA	54.463	492	BGIOSGA001072-PA	343	pep chromosome:ASM465v1:1:30337150:30339375:-1 gene:BGIOSGA001072 transcript:BGIOSGA001072-TA gene-biotype:protein-coding transcript-biotype:protein-coding	BGIOSGA001072-PA	343	343	T	FGLAKLLNSDSSYINTRVMGTYGYVAPEYAN	214.48	166.03	LLNSDSSYINT(1)R	LLNS(-72.4)DS(-68.56)S(-61.85)Y(-86.04)INT(61.85)R	11	2	0.24248	34259000	22172000	8505100	33052000	40534000	60174000	9253400	27362000	33707000	25300000	4674600	6229300
BGIOSGA001072-PA	54.463	492	BGIOSGA001072-PA	133	pep chromosome:ASM465v1:1:30337150:30339375:-1 gene:BGIOSGA001072 transcript:BGIOSGA001072-TA gene-biotype:protein-coding transcript-biotype:protein-coding	BGIOSGA001072-PA	133	133	S	QCSSVYNIEKAGSSYSEDYSSSGPGRKGSSS	154.19	78.069	AGS(0.003)S(0.01)Y(0.008)S(0.978)EDYSSSGPGR	AGS(-25.38)S(-19.8)Y(-20.91)S(19.8)EDY(-34.17)S(-33.78)S(-41.08)S(-46.16)GPGR	6	2	0.80668	10356000	10126000		4202900		31405000	11145000	9331200		9119100	1881900	2815200
BGIOSGA001072-PA	54.463	492	BGIOSGA001072-PA	137	pep chromosome:ASM465v1:1:30337150:30339375:-1 gene:BGIOSGA001072 transcript:BGIOSGA001072-TA gene-biotype:protein-coding transcript-biotype:protein-coding	BGIOSGA001072-PA	137	137	S	VYNIEKAGSSYSEDYSSSGPGRKGSSSYGYA	154.88	151.38	AGS(0.075)S(0.914)Y(0.001)S(0.01)EDYS(0.958)S(0.037)S(0.005)GPGR	AGS(-10.89)S(10.89)Y(-30.46)S(-19.77)EDY(-76.73)S(14.21)S(-14.21)S(-22.93)GPGR	10	2	-0.70951										5621400
BGIOSGA001072-PA	54.463	492	BGIOSGA001072-PA	131	pep chromosome:ASM465v1:1:30337150:30339375:-1 gene:BGIOSGA001072 transcript:BGIOSGA001072-TA gene-biotype:protein-coding transcript-biotype:protein-coding	BGIOSGA001072-PA	131	131	S	FSQCSSVYNIEKAGSSYSEDYSSSGPGRKGS	151.38	151.38	AGS(0.075)S(0.914)Y(0.001)S(0.01)EDYS(0.958)S(0.037)S(0.005)GPGR	AGS(-10.89)S(10.89)Y(-30.46)S(-19.77)EDY(-76.73)S(14.21)S(-14.21)S(-22.93)GPGR	4	2	-0.70951	11266000	14928000		16043000		7164000	12576000	2654600	8457400	4782200		8972600
BGIOSGA001072-PA	54.463	492	BGIOSGA001072-PA	108	pep chromosome:ASM465v1:1:30337150:30339375:-1 gene:BGIOSGA001072 transcript:BGIOSGA001072-TA gene-biotype:protein-coding transcript-biotype:protein-coding	BGIOSGA001072-PA	108	108	S	QDKYEQMKGVSHLAESRSVDVDAFSQCSSVY	82.494	40.496	GVS(1)HLAES(1)R	GVS(40.5)HLAES(40.5)R	8	2	-0.42069	2783700	7477700	10012000		6666900	21564000	25246000	10530000	11818000	35961000	9393700	22796000
BGIOSGA001072-PA	54.463	492	BGIOSGA001072-PA	130	pep chromosome:ASM465v1:1:30337150:30339375:-1 gene:BGIOSGA001072 transcript:BGIOSGA001072-TA gene-biotype:protein-coding transcript-biotype:protein-coding	BGIOSGA001072-PA	130	130	S	AFSQCSSVYNIEKAGSSYSEDYSSSGPGRKG	151.07	151.07	AGS(0.947)S(0.053)YSEDYSSSGPGR	AGS(12.52)S(-12.52)Y(-72.38)S(-63.62)EDY(-107.99)S(-118.12)S(-128.19)S(-134.49)GPGR	3	2	-0.51242				6229900	12975000	10806000		2366600		4543100	4107100
BGIOSGA001072-PA	54.463	492	BGIOSGA001072-PA	139	pep chromosome:ASM465v1:1:30337150:30339375:-1 gene:BGIOSGA001072 transcript:BGIOSGA001072-TA gene-biotype:protein-coding transcript-biotype:protein-coding	BGIOSGA001072-PA	139	139	S	NIEKAGSSYSEDYSSSGPGRKGSSSYGYASA	166.3	166.3	AGSSYSEDYS(0.009)S(0.009)S(0.982)GPGR	AGS(-136.66)S(-136.13)Y(-124.61)S(-109.03)EDY(-96.49)S(-20.45)S(-20.45)S(20.45)GPGR	12	2	-0.090453	7097600			2292800		11008000	4602400
BGIOSGA001072-PA	54.463	492	BGIOSGA001072-PA	87	pep chromosome:ASM465v1:1:30337150:30339375:-1 gene:BGIOSGA001072 transcript:BGIOSGA001072-TA gene-biotype:protein-coding transcript-biotype:protein-coding	BGIOSGA001072-PA	87	87	T	INVDRVDAQSLHDSGTPIMPVQDKYEQMKGV	207.82	207.82	VDAQSLHDS(0.024)GT(0.976)PIMPVQDK	VDAQS(-62.34)LHDS(-16.04)GT(16.04)PIMPVQDK	11	2	0.98499	161160000	175770000	2533700	21826000	102810000	48049000	34071000	7563700	12513000	74706000	8060800
BGIOSGA001072-PA	54.463	492	BGIOSGA001072-PA	85	pep chromosome:ASM465v1:1:30337150:30339375:-1 gene:BGIOSGA001072 transcript:BGIOSGA001072-TA gene-biotype:protein-coding transcript-biotype:protein-coding	BGIOSGA001072-PA	85	85	S	KDINVDRVDAQSLHDSGTPIMPVQDKYEQMK	197.72	197.72	VDAQSLHDS(0.988)GT(0.012)PIMPVQDK	VDAQS(-34.27)LHDS(19.18)GT(-19.18)PIMPVQDK	9	2	0.15719	92993000	109610000	98151000	160040000	165050000	61586000		25629000	16766000	50715000	5178000
BGIOSGA001072-PA	54.463	492	BGIOSGA001072-PA	138	pep chromosome:ASM465v1:1:30337150:30339375:-1 gene:BGIOSGA001072 transcript:BGIOSGA001072-TA gene-biotype:protein-coding transcript-biotype:protein-coding	BGIOSGA001072-PA	138	138	S	YNIEKAGSSYSEDYSSSGPGRKGSSSYGYAS	154.88	63.462	AGS(0.001)S(0.005)YS(0.001)EDY(0.032)S(0.902)S(0.823)S(0.235)GPGR	AGS(-30.47)S(-24.04)Y(-40.66)S(-30.31)EDY(-15.91)S(10.45)S(6.69)S(-6.69)GPGR	11	2	-1.7694	4007600				19083000				2973500			3365200
BGIOSGA001072-PA	54.463	492	BGIOSGA001072-PA	338	pep chromosome:ASM465v1:1:30337150:30339375:-1 gene:BGIOSGA001072 transcript:BGIOSGA001072-TA gene-biotype:protein-coding transcript-biotype:protein-coding	BGIOSGA001072-PA	338	338	S	SKVSDFGLAKLLNSDSSYINTRVMGTYGYVA	158.11	139.46	LLNSDS(0.857)S(0.143)YINTR	LLNS(-34.29)DS(7.77)S(-7.77)Y(-60.81)INT(-38.53)R	6	2	0.54854				11424000	8227900	13566000			5021100	5257400		15592000
BGIOSGA001072-PA	54.463	492	BGIOSGA001072-PA	339	pep chromosome:ASM465v1:1:30337150:30339375:-1 gene:BGIOSGA001072 transcript:BGIOSGA001072-TA gene-biotype:protein-coding transcript-biotype:protein-coding	BGIOSGA001072-PA	339	339	S	KVSDFGLAKLLNSDSSYINTRVMGTYGYVAP	112.08	112.08	LLNS(0.001)DS(0.195)S(0.801)YINT(0.003)R	LLNS(-30.37)DS(-6.13)S(6.13)Y(-61.63)INT(-24.36)R	7	2	1.2585
BGIOSGA001072-PA	54.463	492	BGIOSGA001072-PA	103	pep chromosome:ASM465v1:1:30337150:30339375:-1 gene:BGIOSGA001072 transcript:BGIOSGA001072-TA gene-biotype:protein-coding transcript-biotype:protein-coding	BGIOSGA001072-PA	103	103	S	PIMPVQDKYEQMKGVSHLAESRSVDVDAFSQ	80.916	40.496	GVS(1)HLAES(1)R	GVS(40.5)HLAES(40.5)R	3	2	-0.42069		16265000	10012000	8515200	24087000	20558000	25910000	14621000	12678000	31529000	10260000	15370000
BGIOSGA001072-PA	54.463	492	BGIOSGA001072-PA	81	pep chromosome:ASM465v1:1:30337150:30339375:-1 gene:BGIOSGA001072 transcript:BGIOSGA001072-TA gene-biotype:protein-coding transcript-biotype:protein-coding	BGIOSGA001072-PA	81	81	S	PIVSKDINVDRVDAQSLHDSGTPIMPVQDKY	211.96	153.22	VDAQS(1)LHDSGTPIMPVQDK	VDAQS(63.62)LHDS(-63.62)GT(-77.15)PIMPVQDK	5	2	2.8992	42107000	49232000	43392000	97139000	75040000	112580000	17032000	7563700	20427000	79405000	42844000	43149000
BGIOSGA001095-PA	151.97	1350	BGIOSGA001095-PA	600	pep chromosome:ASM465v1:1:29789049:29794932:-1 gene:BGIOSGA001095 transcript:BGIOSGA001095-TA gene-biotype:protein-coding transcript-biotype:protein-coding	BGIOSGA001095-PA	600	600	S	PRKDAHPSPKHLSERSPTEQRFSGRLSGGRS	118.08	118.08	HLS(0.003)ERS(0.989)PT(0.008)EQR	HLS(-25.43)ERS(20.88)PT(-20.88)EQR	6	3	-0.17643	13419000			20499000	22499000	3641500		20609000	30515000	86573000	36212000	49647000
BGIOSGA001095-PA	151.97	1350	BGIOSGA001095-PA	597	pep chromosome:ASM465v1:1:29789049:29794932:-1 gene:BGIOSGA001095 transcript:BGIOSGA001095-TA gene-biotype:protein-coding transcript-biotype:protein-coding	BGIOSGA001095-PA	597	597	S	DRTPRKDAHPSPKHLSERSPTEQRFSGRLSG	84.169	84.169	HLS(0.933)ERS(0.067)PT(0.001)EQR	HLS(11.46)ERS(-11.46)PT(-30.15)EQR	3	2	0.48987	17235000		6834600	6938200		15689000	37047000
BGIOSGA001095-PA	151.97	1350	BGIOSGA001095-PA	488	pep chromosome:ASM465v1:1:29789049:29794932:-1 gene:BGIOSGA001095 transcript:BGIOSGA001095-TA gene-biotype:protein-coding transcript-biotype:protein-coding	BGIOSGA001095-PA	488	488	S	VERMRSDHRHPENVDSSPNKVHPRSSPGPNT	122.01	84.169	HPENVDS(0.736)S(0.264)PNK	HPENVDS(4.46)S(-4.46)PNK	7	2	0.095013					13932000		23285000	18026000	10520000	61129000	22339000	78297000
BGIOSGA001095-PA	151.97	1350	BGIOSGA001095-PA	1157	pep chromosome:ASM465v1:1:29789049:29794932:-1 gene:BGIOSGA001095 transcript:BGIOSGA001095-TA gene-biotype:protein-coding transcript-biotype:protein-coding	BGIOSGA001095-PA	1157	1157	S	PPKIVEPDQGMEEVASPTIKEPDEDIEVMPL	142.94	127.22	IVEPDQGMEEVAS(0.863)PT(0.137)IK	IVEPDQGMEEVAS(7.98)PT(-7.98)IK	13	2	-2.4359	14580000	23698000	25496000	15911000	13135000	19134000
BGIOSGA001095-PA	151.97	1350	BGIOSGA001095-PA	1020	pep chromosome:ASM465v1:1:29789049:29794932:-1 gene:BGIOSGA001095 transcript:BGIOSGA001095-TA gene-biotype:protein-coding transcript-biotype:protein-coding	BGIOSGA001095-PA	1020	1020	S	QRALALHKNQTAKIVSPTHSILETDRKTYLP	119.17	119.17	IVS(1)PTHSILETDR	IVS(37.98)PT(-37.98)HS(-54.86)ILET(-95.34)DR	3	2	-0.39582			35865000			21690000	16637000	6546900	6329000	22279000	14628000
BGIOSGA001095-PA	151.97	1350	BGIOSGA001095-PA	1022	pep chromosome:ASM465v1:1:29789049:29794932:-1 gene:BGIOSGA001095 transcript:BGIOSGA001095-TA gene-biotype:protein-coding transcript-biotype:protein-coding	BGIOSGA001095-PA	1022	1022	T	ALALHKNQTAKIVSPTHSILETDRKTYLPED	65.225	65.225	IVS(0.413)PT(0.57)HS(0.017)ILETDRK	IVS(-1.4)PT(1.4)HS(-15.17)ILET(-39.67)DRK	5	3	-1.6854	22089000			7631900
BGIOSGA001095-PA	151.97	1350	BGIOSGA001095-PA	498	pep chromosome:ASM465v1:1:29789049:29794932:-1 gene:BGIOSGA001095 transcript:BGIOSGA001095-TA gene-biotype:protein-coding transcript-biotype:protein-coding	BGIOSGA001095-PA	498	498	S	PENVDSSPNKVHPRSSPGPNTYHDKDQNWHG	70.114	68.639	S(0.5)S(0.5)PGPNTYHDKDQNWHGSK	S(0)S(0)PGPNT(-50.62)Y(-50.92)HDKDQNWHGS(-68.18)K	2	4	-0.074261							14389000	6175100		16666000
BGIOSGA001095-PA	151.97	1350	BGIOSGA001095-PA	666	pep chromosome:ASM465v1:1:29789049:29794932:-1 gene:BGIOSGA001095 transcript:BGIOSGA001095-TA gene-biotype:protein-coding transcript-biotype:protein-coding	BGIOSGA001095-PA	666	666	S	YREPTPSSSSRGGHFSGTSPNHPLPPPPRHR	54.143	54.143	GGHFS(0.363)GT(0.318)S(0.318)PNHPLPPPPR	GGHFS(0.57)GT(-0.57)S(-0.57)PNHPLPPPPR	5	2	0.17996
BGIOSGA001095-PA	151.97	1350	BGIOSGA001095-PA	669	pep chromosome:ASM465v1:1:29789049:29794932:-1 gene:BGIOSGA001095 transcript:BGIOSGA001095-TA gene-biotype:protein-coding transcript-biotype:protein-coding	BGIOSGA001095-PA	669	669	S	PTPSSSSRGGHFSGTSPNHPLPPPPRHRSDD	137.13	135.91	GGHFS(0.075)GT(0.157)S(0.768)PNHPLPPPPR	GGHFS(-10.12)GT(-6.89)S(6.89)PNHPLPPPPR	8	3	-0.37697	40524000	51213000	65769000	4720900	8831800	54126000
BGIOSGA001095-PA	151.97	1350	BGIOSGA001095-PA	1345	pep chromosome:ASM465v1:1:29789049:29794932:-1 gene:BGIOSGA001095 transcript:BGIOSGA001095-TA gene-biotype:protein-coding transcript-biotype:protein-coding	BGIOSGA001095-PA	1345	1345	S	EALVESRVNLSRIPNSPESTH----------	133.83	133.83	IPNS(1)PESTH	IPNS(35.98)PES(-35.98)T(-45.57)H	4	2	-1.3919	46972000	52011000	61397000	53317000	32071000	43381000	25193000	15375000	16631000	28684000	18736000	23014000
BGIOSGA001095-PA	151.97	1350	BGIOSGA001095-PA	489	pep chromosome:ASM465v1:1:29789049:29794932:-1 gene:BGIOSGA001095 transcript:BGIOSGA001095-TA gene-biotype:protein-coding transcript-biotype:protein-coding	BGIOSGA001095-PA	489	489	S	ERMRSDHRHPENVDSSPNKVHPRSSPGPNTY	119.87	104.2	HPENVDS(0.026)S(0.974)PNKVHPR	HPENVDS(-15.81)S(15.81)PNKVHPR	8	4	0.52874	18495000	10930000	20833000		9700200			12792000			18346000	66456000
BGIOSGA001095-PA	151.97	1350	BGIOSGA001095-PA	635	pep chromosome:ASM465v1:1:29789049:29794932:-1 gene:BGIOSGA001095 transcript:BGIOSGA001095-TA gene-biotype:protein-coding transcript-biotype:protein-coding	BGIOSGA001095-PA	635	635	S	AERSGLTKYRDRDGDSVERSVHQDRTPAKAP	90.793	90.793	DRDGDS(1)VER	DRDGDS(90.79)VER	6	2	-0.39796								2001900		11641000	5751200	7867800
BGIOSGA001095-PA	151.97	1350	BGIOSGA001095-PA	497	pep chromosome:ASM465v1:1:29789049:29794932:-1 gene:BGIOSGA001095 transcript:BGIOSGA001095-TA gene-biotype:protein-coding transcript-biotype:protein-coding	BGIOSGA001095-PA	497	497	S	HPENVDSSPNKVHPRSSPGPNTYHDKDQNWH	70.114	68.639	S(0.5)S(0.5)PGPNTYHDKDQNWHGSK	S(0)S(0)PGPNT(-50.62)Y(-50.92)HDKDQNWHGS(-68.18)K	1	4	-0.074261							14389000	6175100		16666000
BGIOSGA001095-PA	151.97	1350	BGIOSGA001095-PA	668	pep chromosome:ASM465v1:1:29789049:29794932:-1 gene:BGIOSGA001095 transcript:BGIOSGA001095-TA gene-biotype:protein-coding transcript-biotype:protein-coding	BGIOSGA001095-PA	668	668	T	EPTPSSSSRGGHFSGTSPNHPLPPPPRHRSD	142.43	142.43	GGHFS(0.01)GT(0.529)S(0.461)PNHPLPPPPR	GGHFS(-17.2)GT(0.6)S(-0.6)PNHPLPPPPR	7	3	0.75348					58362000
BGIOSGA001102-PA	147.06	1377	BGIOSGA001102-PA	1144	pep chromosome:ASM465v1:1:29666351:29678122:-1 gene:BGIOSGA001102 transcript:BGIOSGA001102-TA gene-biotype:protein-coding transcript-biotype:protein-coding	BGIOSGA001102-PA	1144	1144	T	LVIAWNKMLQKELDHTPTVKTDAAAAFLASL	71.066	57.149	ELDHT(0.991)PT(0.009)VK	ELDHT(20.62)PT(-20.62)VK	5	2	-0.60405										9618200	4005900
BGIOSGA001116-PA	28.87	264	BGIOSGA001116-PA	9	pep chromosome:ASM465v1:1:29387548:29388623:-1 gene:BGIOSGA001116 transcript:BGIOSGA001116-TA gene-biotype:protein-coding transcript-biotype:protein-coding	BGIOSGA001116-PA	9	9	S	-------MPRPKRRRSPLPPPAPPGFPTERK	89.507	79.022	S(1)PLPPPAPPGFPTER	S(76.96)PLPPPAPPGFPT(-76.96)ER	1	2	0.54524	10880000	12561000	21296000
BGIOSGA001160-PA	101.17	927	BGIOSGA001160-PA	737	pep chromosome:ASM465v1:1:28554124:28558789:-1 gene:BGIOSGA001160 transcript:BGIOSGA001160-TA gene-biotype:protein-coding transcript-biotype:protein-coding	BGIOSGA001160-PA	737	737	S	ESVEYYETPNFQKSSSIAHGETETVEKEKMF	78.505	50.088	S(0.159)S(0.159)S(0.681)IAHGET(0.001)ET(0.001)VEK	S(-6.33)S(-6.33)S(6.33)IAHGET(-31.03)ET(-31.03)VEK	3	2	-0.057259	23471000	27660000		9360800	6080300				1817000	5359800	4429900	8369700
BGIOSGA001174-PA	8.7022	80	BGIOSGA001174-PA	20	pep chromosome:ASM465v1:1:28102351:28102593:-1 gene:BGIOSGA001174 transcript:BGIOSGA001174-TA gene-biotype:protein-coding transcript-biotype:protein-coding	BGIOSGA001174-PA	20	20	S	PSLKPKPKVKGARKGSPAADEEQSTAAAAVR	238.94	192.25	KGS(1)PAADEEQSTAAAAVR	KGS(118.1)PAADEEQS(-118.1)T(-123.4)AAAAVR	3	2	0.16747	184600000	199150000	206190000	70694000	130000000	67595000	43946000	19230000	10317000	38612000	15189000	30334000
BGIOSGA001181-PA	70.845	638	BGIOSGA001181-PA	189	pep chromosome:ASM465v1:1:27934221:27936540:-1 gene:BGIOSGA001181 transcript:BGIOSGA001181-TA gene-biotype:protein-coding transcript-biotype:protein-coding	BGIOSGA001181-PA	189	189	S	FDDAHPPAVGRVQAHSPRLLLNQTRFHSQPI	83.869	78.098	VQAHS(1)PR	VQAHS(78.1)PR	5	2	-0.20989			5265600	8186000	4573900	9692400	16634000	6281100	7920800		10221000
BGIOSGA001187-PA	88.225	790	BGIOSGA001187-PA	623	pep chromosome:ASM465v1:1:27828952:27832063:-1 gene:BGIOSGA001187 transcript:BGIOSGA001187-TA gene-biotype:protein-coding transcript-biotype:protein-coding	BGIOSGA001187-PA	623	623	S	GSSFNERTNSGFSRGSSETALEEDQPSTGKS	104.95	85.522	GS(0.528)S(0.387)ET(0.085)ALEEDQPSTGK	GS(1.35)S(-1.35)ET(-7.92)ALEEDQPS(-73.92)T(-77.21)GK	2	2	0.062761		17447000		6452500
BGIOSGA001187-PA	88.225	790	BGIOSGA001187-PA	394	pep chromosome:ASM465v1:1:27828952:27832063:-1 gene:BGIOSGA001187 transcript:BGIOSGA001187-TA gene-biotype:protein-coding transcript-biotype:protein-coding	BGIOSGA001187-PA	394	394	S	AECQVEPSDARVSPCSPVLEDKLVDPLCSQE	136.27	68.809	VS(1)PCS(1)PVLEDK	VS(68.81)PCS(68.81)PVLEDK	5	2	-0.78382	59146000	68979000	54189000	62197000		57311000	34558000					33920000
BGIOSGA001187-PA	88.225	790	BGIOSGA001187-PA	575	pep chromosome:ASM465v1:1:27828952:27832063:-1 gene:BGIOSGA001187 transcript:BGIOSGA001187-TA gene-biotype:protein-coding transcript-biotype:protein-coding	BGIOSGA001187-PA	575	575	S	ANAPLEDTRNASDAASLSEISEEKKTEEENG	104.2	104.2	NASDAAS(0.96)LS(0.04)EISEEK	NAS(-49.5)DAAS(13.85)LS(-13.85)EIS(-34)EEK	7	2	-0.3711		12957000	11131000	11303000	9535500
BGIOSGA001187-PA	88.225	790	BGIOSGA001187-PA	456	pep chromosome:ASM465v1:1:27828952:27832063:-1 gene:BGIOSGA001187 transcript:BGIOSGA001187-TA gene-biotype:protein-coding transcript-biotype:protein-coding	BGIOSGA001187-PA	456	456	S	LSMGSEQKRKECDEDSLVDESMCKTHEQKSK	60.209	46.971	RKECDEDS(0.999)LVDES(0.001)MCK	RKECDEDS(32.31)LVDES(-32.31)MCK	8	3	0.030566					9251600				3268000	6826900
BGIOSGA001187-PA	88.225	790	BGIOSGA001187-PA	391	pep chromosome:ASM465v1:1:27828952:27832063:-1 gene:BGIOSGA001187 transcript:BGIOSGA001187-TA gene-biotype:protein-coding transcript-biotype:protein-coding	BGIOSGA001187-PA	391	391	S	ERDAECQVEPSDARVSPCSPVLEDKLVDPLC	68.809	68.809	VS(1)PCS(1)PVLEDK	VS(68.81)PCS(68.81)PVLEDK	2	2	-0.78382				3360200
BGIOSGA001187-PA	88.225	790	BGIOSGA001187-PA	360	pep chromosome:ASM465v1:1:27828952:27832063:-1 gene:BGIOSGA001187 transcript:BGIOSGA001187-TA gene-biotype:protein-coding transcript-biotype:protein-coding	BGIOSGA001187-PA	360	360	S	GSSRSIQLKTDGLLLSPSRSGDIESPKDILC	175.57	160.56	TDGLLLS(0.977)PS(0.023)R	T(-113.6)DGLLLS(16.28)PS(-16.28)R	7	2	0.21102	51124000	48208000	43055000	37705000	38764000	57100000		13468000	13313000	35790000	27743000	31107000
BGIOSGA001187-PA	88.225	790	BGIOSGA001187-PA	187	pep chromosome:ASM465v1:1:27828952:27832063:-1 gene:BGIOSGA001187 transcript:BGIOSGA001187-TA gene-biotype:protein-coding transcript-biotype:protein-coding	BGIOSGA001187-PA	187	187	S	YFAGQHECYRFERSPSVSSDYDRRSVASSLY	122.7	122.7	SPS(1)VSSDYDR	S(-40.53)PS(40.53)VS(-52.21)S(-62.21)DY(-91.63)DR	3	2	0.5779	5350000		3623400		7961500	7316800	11147000	4068200	3411900	10098000		12500000
BGIOSGA001187-PA	88.225	790	BGIOSGA001187-PA	414	pep chromosome:ASM465v1:1:27828952:27832063:-1 gene:BGIOSGA001187 transcript:BGIOSGA001187-TA gene-biotype:protein-coding transcript-biotype:protein-coding	BGIOSGA001187-PA	414	414	S	DKLVDPLCSQEKDNNSEDLGMANISDVNCKG	99.531	99.531	DNNS(1)EDLGMANISDVNCK	DNNS(62.11)EDLGMANIS(-62.11)DVNCK	4	2	1.7755
BGIOSGA001187-PA	88.225	790	BGIOSGA001187-PA	190	pep chromosome:ASM465v1:1:27828952:27832063:-1 gene:BGIOSGA001187 transcript:BGIOSGA001187-TA gene-biotype:protein-coding transcript-biotype:protein-coding	BGIOSGA001187-PA	190	190	S	GQHECYRFERSPSVSSDYDRRSVASSLYSHR	57.149	57.149	SPSVS(0.24)S(0.757)DY(0.002)DRR	S(-40.21)PS(-36.12)VS(-4.98)S(4.98)DY(-25.39)DRR	6	2	0.34649										5462300	1803800	3438500
BGIOSGA001187-PA	88.225	790	BGIOSGA001187-PA	369	pep chromosome:ASM465v1:1:27828952:27832063:-1 gene:BGIOSGA001187 transcript:BGIOSGA001187-TA gene-biotype:protein-coding transcript-biotype:protein-coding	BGIOSGA001187-PA	369	369	S	TDGLLLSPSRSGDIESPKDILCERDAECQVE	188.9	165.16	SGDIES(1)PKDILCER	S(-76.97)GDIES(76.97)PKDILCER	6	2	0.25027		49620000	42770000	46267000		63650000	17027000	9480600	14532000	22009000	46827000	22147000
BGIOSGA001187-PA	88.225	790	BGIOSGA001187-PA	635	pep chromosome:ASM465v1:1:27828952:27832063:-1 gene:BGIOSGA001187 transcript:BGIOSGA001187-TA gene-biotype:protein-coding transcript-biotype:protein-coding	BGIOSGA001187-PA	635	635	T	SRGSSETALEEDQPSTGKSGDSSFFAGFLKK	63.923	63.923	GSSETALEEDQPS(0.275)T(0.725)GK	GS(-58.43)S(-58.43)ET(-60.3)ALEEDQPS(-4.22)T(4.22)GK	14	2	1.284			3274400							9160000
BGIOSGA001187-PA	88.225	790	BGIOSGA001187-PA	280	pep chromosome:ASM465v1:1:27828952:27832063:-1 gene:BGIOSGA001187 transcript:BGIOSGA001187-TA gene-biotype:protein-coding transcript-biotype:protein-coding	BGIOSGA001187-PA	280	280	S	SLKREEKVIPFSPSASFCVPKIEQGSNDQTR	57.288	57.288	VIPFS(0.982)PS(0.116)AS(0.901)FCVPK	VIPFS(17.01)PS(-9.51)AS(9.51)FCVPK	9	2	-3.7764
BGIOSGA001187-PA	88.225	790	BGIOSGA001187-PA	362	pep chromosome:ASM465v1:1:27828952:27832063:-1 gene:BGIOSGA001187 transcript:BGIOSGA001187-TA gene-biotype:protein-coding transcript-biotype:protein-coding	BGIOSGA001187-PA	362	362	S	SRSIQLKTDGLLLSPSRSGDIESPKDILCER	67.644	67.644	T(0.003)DGLLLS(0.935)PS(0.704)RS(0.358)GDIES(0.001)PK	T(-27.03)DGLLLS(10.03)PS(3.38)RS(-3.38)GDIES(-29.76)PK	9	2	-1.72
BGIOSGA001187-PA	88.225	790	BGIOSGA001187-PA	624	pep chromosome:ASM465v1:1:27828952:27832063:-1 gene:BGIOSGA001187 transcript:BGIOSGA001187-TA gene-biotype:protein-coding transcript-biotype:protein-coding	BGIOSGA001187-PA	624	624	S	SSFNERTNSGFSRGSSETALEEDQPSTGKSG	104.95	103.88	GS(0.185)S(0.812)ET(0.003)ALEEDQPSTGK	GS(-6.43)S(6.43)ET(-24.97)ALEEDQPS(-88.25)T(-91.97)GK	3	2	-0.20255	3771200				14187000	20581000				10698000		3927800
BGIOSGA001187-PA	88.225	790	BGIOSGA001187-PA	514	pep chromosome:ASM465v1:1:27828952:27832063:-1 gene:BGIOSGA001187 transcript:BGIOSGA001187-TA gene-biotype:protein-coding transcript-biotype:protein-coding	BGIOSGA001187-PA	514	514	S	GNEKHEFESKKDDTNSLEGESLNKEHEQKSK	270.78	270.78	KDDTNS(1)LEGESLNK	KDDT(-42.29)NS(42.29)LEGES(-110.74)LNK	6	2	-0.66735	18348000	19113000	17523000	32149000	26198000	23728000	16053000	10556000	6450200	26669000	17567000
BGIOSGA001187-PA	88.225	790	BGIOSGA001187-PA	276	pep chromosome:ASM465v1:1:27828952:27832063:-1 gene:BGIOSGA001187 transcript:BGIOSGA001187-TA gene-biotype:protein-coding transcript-biotype:protein-coding	BGIOSGA001187-PA	276	276	S	SQIVSLKREEKVIPFSPSASFCVPKIEQGSN	98.501	98.501	VIPFS(0.997)PS(0.002)ASFCVPK	VIPFS(26.47)PS(-26.47)AS(-34.46)FCVPK	5	2	0.7322	28510000	32339000		42083000	27659000	40744000				20171000	18922000
BGIOSGA001206-PA	65.301	613	BGIOSGA001206-PA	8	pep chromosome:ASM465v1:1:27441985:27443826:-1 gene:BGIOSGA001206 transcript:BGIOSGA001206-TA gene-biotype:protein-coding transcript-biotype:protein-coding	BGIOSGA001206-PA	8	8	S	--------MSSAAVASPRETVSPPMSLGKVG	89.805	86.911	SSAAVAS(1)PR	S(-61.29)S(-62.82)AAVAS(61.29)PR	7	2	0.54126	2647400				7562700	4284800
BGIOSGA001210-PA	113.61	1041	BGIOSGA001210-PA	757	pep chromosome:ASM465v1:1:27414370:27420067:-1 gene:BGIOSGA001210 transcript:BGIOSGA001210-TA gene-biotype:protein-coding transcript-biotype:protein-coding	BGIOSGA001210-PA	757	757	S	SNLARQSLYTSDDRDSPKASAILGRLRERCP	64.104	64.104	QSLYT(0.014)S(0.065)DDRDS(0.921)PK	QS(-49.13)LY(-43.9)T(-18.03)S(-11.53)DDRDS(11.53)PK	11	2	-1.3129										7387000		4341600
BGIOSGA001211-PA	25.328	260	BGIOSGA001211-PA	243	pep chromosome:ASM465v1:1:27404634:27405416:-1 gene:BGIOSGA001211 transcript:BGIOSGA001211-TA gene-biotype:protein-coding transcript-biotype:protein-coding	BGIOSGA001211-PA	243	243	S	YPLPGPGFRGQEGGMSPGPGGRAPMYPNVPP	214.61	64.499	GQEGGMS(1)PGPGGR	GQEGGMS(64.5)PGPGGR	7	2	0.78935	198570000	240050000	194990000	237640000	287260000	341780000	242560000	158790000	163310000	284800000	170190000	215250000
BGIOSGA001226-PA	31.739	292	BGIOSGA001226-PA	82	pep chromosome:ASM465v1:1:27151988:27154666:-1 gene:BGIOSGA001226 transcript:BGIOSGA001226-TA gene-biotype:protein-coding transcript-biotype:protein-coding description:Protein YIPF [Source:UniProtKB/TrEMBL;Acc:B8ABL4]	BGIOSGA001226-PA	82	82	S	KSGGGGRGGGGGGAGSDDAGQGGWFRMFSVA	64.52	64.52	GGGGGGAGS(1)DDAGQGGWFR	GGGGGGAGS(64.52)DDAGQGGWFR	9	2	-1.744
BGIOSGA001226-PA	31.739	292	BGIOSGA001226-PA	50	pep chromosome:ASM465v1:1:27151988:27154666:-1 gene:BGIOSGA001226 transcript:BGIOSGA001226-TA gene-biotype:protein-coding transcript-biotype:protein-coding description:Protein YIPF [Source:UniProtKB/TrEMBL;Acc:B8ABL4]	BGIOSGA001226-PA	50	50	S	SNLQIFPPSEAKGKISGAYRPPTDADDTFSS	49.559	49.559	GKIS(0.972)GAY(0.009)RPPT(0.018)DADDT(0.001)FSSSK	GKIS(17.42)GAY(-20.11)RPPT(-17.42)DADDT(-29.9)FS(-36.95)S(-40)S(-40)K	4	3	0.16185							14618000			8987700	5043600
BGIOSGA001241-PA	70.637	684	BGIOSGA001241-PA	668	pep chromosome:ASM465v1:1:26923065:26928464:-1 gene:BGIOSGA001241 transcript:BGIOSGA001241-TA gene-biotype:protein-coding transcript-biotype:protein-coding	BGIOSGA001241-PA	668	668	T	HGRTTTEESEEGVRGTSEEERSRGTPPAAPT	68.445	61.226	T(0.062)T(0.062)T(0.062)EES(0.046)EEGVRGT(0.384)S(0.384)EEER	T(-7.9)T(-7.9)T(-7.9)EES(-9.2)EEGVRGT(0)S(0)EEER	13	2	0.35622
BGIOSGA001241-PA	70.637	684	BGIOSGA001241-PA	658	pep chromosome:ASM465v1:1:26923065:26928464:-1 gene:BGIOSGA001241 transcript:BGIOSGA001241-TA gene-biotype:protein-coding transcript-biotype:protein-coding	BGIOSGA001241-PA	658	658	T	VRMIEEIGGGHGRTTTEESEEGVRGTSEEER	101.48	72.916	T(0.006)T(0.006)T(0.939)EES(0.011)EEGVRGT(0.025)S(0.014)EEER	T(-22.14)T(-22.14)T(15.77)EES(-19.42)EEGVRGT(-15.77)S(-18.39)EEER	3	3	0.15729	16007000	11280000				125790000	27975000		21396000		5206900	10461000
BGIOSGA001241-PA	70.637	684	BGIOSGA001241-PA	674	pep chromosome:ASM465v1:1:26923065:26928464:-1 gene:BGIOSGA001241 transcript:BGIOSGA001241-TA gene-biotype:protein-coding transcript-biotype:protein-coding	BGIOSGA001241-PA	674	674	S	EESEEGVRGTSEEERSRGTPPAAPTP-----	129.34	70.889	S(1)RGT(1)PPAAPT(1)P	S(70.89)RGT(70.89)PPAAPT(70.89)P	1	2	-0.46044	245820000	177280000	176230000	167580000	146010000	166670000	77565000	39348000	34342000	90105000	51546000	60125000
BGIOSGA001241-PA	70.637	684	BGIOSGA001241-PA	325	pep chromosome:ASM465v1:1:26923065:26928464:-1 gene:BGIOSGA001241 transcript:BGIOSGA001241-TA gene-biotype:protein-coding transcript-biotype:protein-coding	BGIOSGA001241-PA	325	325	S	AGAGAAAARGVPPPGSGEGTGMTSSSKEDMG	47.904	47.904	GVPPPGS(0.537)GEGT(0.162)GMT(0.162)S(0.051)S(0.067)S(0.021)K	GVPPPGS(5.2)GEGT(-5.2)GMT(-5.2)S(-10.26)S(-9.01)S(-14.01)K	7	2	-2.2198	10561000		6607500	7009500		6087400
BGIOSGA001241-PA	70.637	684	BGIOSGA001241-PA	669	pep chromosome:ASM465v1:1:26923065:26928464:-1 gene:BGIOSGA001241 transcript:BGIOSGA001241-TA gene-biotype:protein-coding transcript-biotype:protein-coding	BGIOSGA001241-PA	669	669	S	GRTTTEESEEGVRGTSEEERSRGTPPAAPTP	68.445	46.131	T(0.046)T(0.046)T(0.046)EES(0.027)EEGVRGT(0.167)S(0.668)EEER	T(-11.63)T(-11.63)T(-11.63)EES(-13.95)EEGVRGT(-6.02)S(6.02)EEER	14	2	-0.27347	5823900				6280700		29083000	14641000	25937000	15213000	9517500	8513700
BGIOSGA001241-PA	70.637	684	BGIOSGA001241-PA	677	pep chromosome:ASM465v1:1:26923065:26928464:-1 gene:BGIOSGA001241 transcript:BGIOSGA001241-TA gene-biotype:protein-coding transcript-biotype:protein-coding	BGIOSGA001241-PA	677	677	T	EEGVRGTSEEERSRGTPPAAPTP--------	125.47	70.889	S(1)RGT(1)PPAAPT(1)P	S(70.89)RGT(70.89)PPAAPT(70.89)P	4	2	-0.46044	163860000	4314700	155250000	24118000	31584000	141700000	175850000	77304000		89540000	49671000	10244000
BGIOSGA001241-PA	70.637	684	BGIOSGA001241-PA	683	pep chromosome:ASM465v1:1:26923065:26928464:-1 gene:BGIOSGA001241 transcript:BGIOSGA001241-TA gene-biotype:protein-coding transcript-biotype:protein-coding	BGIOSGA001241-PA	683	683	T	TSEEERSRGTPPAAPTP--------------	125.47	70.889	S(1)RGT(1)PPAAPT(1)P	S(70.89)RGT(70.89)PPAAPT(70.89)P	10	2	-0.46044	206090000	193260000	155250000	89245000	131400000	141700000	175850000	77304000	84012000	96860000	55075000	75882000
BGIOSGA001241-PA	70.637	684	BGIOSGA001241-PA	661	pep chromosome:ASM465v1:1:26923065:26928464:-1 gene:BGIOSGA001241 transcript:BGIOSGA001241-TA gene-biotype:protein-coding transcript-biotype:protein-coding	BGIOSGA001241-PA	661	661	S	IEEIGGGHGRTTTEESEEGVRGTSEEERSRG	46.403	46.403	T(0.003)T(0.003)T(0.259)EES(0.324)EEGVRGT(0.324)S(0.087)EEER	T(-20.48)T(-20.48)T(-0.98)EES(0)EEGVRGT(0)S(-5.72)EEER	6	3	-0.80509
BGIOSGA001256-PA	39.885	354	BGIOSGA001256-PA	7	pep chromosome:ASM465v1:1:26671216:26674913:-1 gene:BGIOSGA001256 transcript:BGIOSGA001256-TA gene-biotype:protein-coding transcript-biotype:protein-coding	BGIOSGA001256-PA	7	7	S	---------MGDGEGSTGGGGGGGDPQRLKR	104.78	104.78	GDGEGS(0.979)T(0.021)GGGGGGGDPQR	GDGEGS(16.59)T(-16.59)GGGGGGGDPQR	6	2	0.60741				11034000				22256000	24394000	59994000	31526000	28510000
BGIOSGA001259-PA	41.126	380	BGIOSGA001259-PA;BGIOSGA001260-PA	35;35	pep chromosome:ASM465v1:1:26553154:26556834:-1 gene:BGIOSGA001259 transcript:BGIOSGA001259-TA gene-biotype:protein-coding transcript-biotype:protein-coding;pep chromosome:ASM465v1:1:26509824:26511939:-1 gene:BGIOSGA001260 transcript:BGIOSGA001260-TA gene-b	BGIOSGA001259-PA	35	35	S	HLIAAAEKKAAAAAASPKPAAQAKLPTKPPP	158.74	73.881	KAAAAAAS(1)PK	KAAAAAAS(73.88)PK	8	2	-0.14261	168860000	164910000	146170000	103940000	152810000	125370000	181110000	115670000		510820000	176020000	249290000
BGIOSGA001259-PA	41.126	380	BGIOSGA001259-PA	229	pep chromosome:ASM465v1:1:26553154:26556834:-1 gene:BGIOSGA001259 transcript:BGIOSGA001259-TA gene-biotype:protein-coding transcript-biotype:protein-coding	BGIOSGA001259-PA	229	229	S	DVPQSDEVEKHKEGESNEEEEKEPEDKEMTL	93.729	45.423	HKEGES(1)NEEEEKEPEDK	HKEGES(45.42)NEEEEKEPEDK	6	4	0.83349							10266000	8734600	9760900		8175100	10420000
BGIOSGA001306-PA	47.711	418	BGIOSGA001306-PA	54	pep chromosome:ASM465v1:1:25717442:25720994:-1 gene:BGIOSGA001306 transcript:BGIOSGA001306-TA gene-biotype:protein-coding transcript-biotype:protein-coding	BGIOSGA001306-PA	54	54	S	LAHDPREEDSDHHPASPMGRGDIDEDSDDDG	84.753	84.753	EEDSDHHPAS(1)PMGR	EEDS(-38.68)DHHPAS(38.68)PMGR	10	2	1.3446	13031000	17755000
BGIOSGA001306-PA	47.711	418	BGIOSGA001306-PA	33	pep chromosome:ASM465v1:1:25717442:25720994:-1 gene:BGIOSGA001306 transcript:BGIOSGA001306-TA gene-biotype:protein-coding transcript-biotype:protein-coding	BGIOSGA001306-PA	33	33	S	SQHPIACTDDPPMSESPTTDVLAHDPREEDS	43.066	42.618	DSQHPIACT(0.001)DDPPMS(0.346)ES(0.346)PT(0.153)T(0.153)DVLAHDPR	DS(-34.66)QHPIACT(-24.36)DDPPMS(0)ES(0)PT(-3.54)T(-3.54)DVLAHDPR	17	3	0.4055
BGIOSGA001306-PA	47.711	418	BGIOSGA001306-PA	31	pep chromosome:ASM465v1:1:25717442:25720994:-1 gene:BGIOSGA001306 transcript:BGIOSGA001306-TA gene-biotype:protein-coding transcript-biotype:protein-coding	BGIOSGA001306-PA	31	31	S	RDSQHPIACTDDPPMSESPTTDVLAHDPREE	42.618	42.618	DSQHPIACT(0.001)DDPPMS(0.346)ES(0.346)PT(0.153)T(0.153)DVLAHDPR	DS(-34.66)QHPIACT(-24.36)DDPPMS(0)ES(0)PT(-3.54)T(-3.54)DVLAHDPR	15	3	0.4055
BGIOSGA001306-PA	47.711	418	BGIOSGA001306-PA	65	pep chromosome:ASM465v1:1:25717442:25720994:-1 gene:BGIOSGA001306 transcript:BGIOSGA001306-TA gene-biotype:protein-coding transcript-biotype:protein-coding	BGIOSGA001306-PA	65	65	S	HHPASPMGRGDIDEDSDDDGYADEETTCPGQ	84.14	68.481	GDIDEDS(0.547)DDDGY(0.451)ADEET(0.002)TCPGQNFTK	GDIDEDS(0.83)DDDGY(-0.83)ADEET(-24.89)T(-30.71)CPGQNFT(-66.38)K	7	2	0.9136
BGIOSGA001308-PA	57.594	511	BGIOSGA001308-PA	91	pep chromosome:ASM465v1:1:25689898:25693993:-1 gene:BGIOSGA001308 transcript:BGIOSGA001308-TA gene-biotype:protein-coding transcript-biotype:protein-coding	BGIOSGA001308-PA	91	91	S	SRDSQPIPCTDDPPLSESPTTDLGCHDPRDE	42.571	42.571	DSQPIPCT(0.114)DDPPLS(0.355)ES(0.305)PT(0.113)T(0.113)DLGCHDPR	DS(-30.25)QPIPCT(-4.93)DDPPLS(0.66)ES(-0.66)PT(-4.99)T(-4.99)DLGCHDPR	14	3	0.10472
BGIOSGA001308-PA	57.594	511	BGIOSGA001308-PA	93	pep chromosome:ASM465v1:1:25689898:25693993:-1 gene:BGIOSGA001308 transcript:BGIOSGA001308-TA gene-biotype:protein-coding transcript-biotype:protein-coding	BGIOSGA001308-PA	93	93	S	DSQPIPCTDDPPLSESPTTDLGCHDPRDEDA	109.71	109.71	DSQPIPCT(0.016)DDPPLS(0.025)ES(0.882)PT(0.059)T(0.018)DLGCHDPR	DS(-79.68)QPIPCT(-17.33)DDPPLS(-15.51)ES(11.75)PT(-11.75)T(-16.82)DLGCHDPR	16	3	-0.34273								38113000	81549000
BGIOSGA001311-PA	24.665	225	BGIOSGA001311-PA	170	pep chromosome:ASM465v1:1:25672073:25673822:-1 gene:BGIOSGA001311 transcript:BGIOSGA001311-TA gene-biotype:protein-coding transcript-biotype:protein-coding	BGIOSGA001311-PA	170	170	S	ISDQSKNTIFSNALSSPVRRSLQSYHLTQGS	141.34	138.01	NTIFSNALS(0.056)S(0.944)PVR	NT(-98.28)IFS(-72.72)NALS(-12.29)S(12.29)PVR	10	2	-0.25404
BGIOSGA001315-PA	54.383	494	BGIOSGA001315-PA	455	pep chromosome:ASM465v1:1:25580566:25584838:-1 gene:BGIOSGA001315 transcript:BGIOSGA001315-TA gene-biotype:protein-coding transcript-biotype:protein-coding	BGIOSGA001315-PA	455	455	S	QQERAASLGNPIGSQSMKAQGTFARNGQQPM	60.657	60.657	AASLGNPIGS(0.5)QS(0.5)MK	AAS(-52.12)LGNPIGS(0)QS(0)MK	12	2	-2.4566
BGIOSGA001315-PA	54.383	494	BGIOSGA001315-PA	453	pep chromosome:ASM465v1:1:25580566:25584838:-1 gene:BGIOSGA001315 transcript:BGIOSGA001315-TA gene-biotype:protein-coding transcript-biotype:protein-coding	BGIOSGA001315-PA	453	453	S	SMQQERAASLGNPIGSQSMKAQGTFARNGQQ	60.657	47.345	AASLGNPIGS(0.688)QS(0.312)MK	AAS(-38.35)LGNPIGS(3.43)QS(-3.43)MK	10	2	0.38857
BGIOSGA001315-PA	54.383	494	BGIOSGA001315-PA	474	pep chromosome:ASM465v1:1:25580566:25584838:-1 gene:BGIOSGA001315 transcript:BGIOSGA001315-TA gene-biotype:protein-coding transcript-biotype:protein-coding	BGIOSGA001315-PA	474	474	S	QGTFARNGQQPMRSLSYGPHASPYRQSPRPN	63.76	63.76	S(0.025)LS(0.969)Y(0.006)GPHASPYR	S(-15.85)LS(15.85)Y(-22.36)GPHAS(-51.52)PY(-52.6)R	3	2	2.2077
BGIOSGA001326-PA	37.911	342	BGIOSGA001326-PA	101	pep chromosome:ASM465v1:1:25436118:25438197:-1 gene:BGIOSGA001326 transcript:BGIOSGA001326-TA gene-biotype:protein-coding transcript-biotype:protein-coding	BGIOSGA001326-PA	101	101	S	SSSKKTTRRQKKPPTSSLEELELPNSAMNKI	146.15	146.15	KPPT(0.116)S(0.442)S(0.442)LEELELPNSAMNK	KPPT(-5.83)S(0)S(0)LEELELPNS(-114.26)AMNK	5	2	0.23632
BGIOSGA001326-PA	37.911	342	BGIOSGA001326-PA	102	pep chromosome:ASM465v1:1:25436118:25438197:-1 gene:BGIOSGA001326 transcript:BGIOSGA001326-TA gene-biotype:protein-coding transcript-biotype:protein-coding	BGIOSGA001326-PA	102	102	S	SSKKTTRRQKKPPTSSLEELELPNSAMNKIQ	146.15	64.038	KPPT(0.195)S(0.195)S(0.61)LEELELPNSAMNK	KPPT(-4.95)S(-4.95)S(4.95)LEELELPNS(-63.64)AMNK	6	3	0.058306	34510000
BGIOSGA001326-PA	37.911	342	BGIOSGA001326-PA	100	pep chromosome:ASM465v1:1:25436118:25438197:-1 gene:BGIOSGA001326 transcript:BGIOSGA001326-TA gene-biotype:protein-coding transcript-biotype:protein-coding	BGIOSGA001326-PA	100	100	T	SSSSKKTTRRQKKPPTSSLEELELPNSAMNK	59.342	55.986	KPPT(0.333)S(0.333)S(0.333)LEELELPNSAMNK	KPPT(0)S(0)S(0)LEELELPNS(-54.69)AMNK	4	3	0.067772
BGIOSGA001326-PA	37.911	342	BGIOSGA001326-PA	306	pep chromosome:ASM465v1:1:25436118:25438197:-1 gene:BGIOSGA001326 transcript:BGIOSGA001326-TA gene-biotype:protein-coding transcript-biotype:protein-coding	BGIOSGA001326-PA	306	306	S	SSVEGRDCSYYGVCPSPRGVSRRITDELSDW	166.86	166.86	DCSYYGVCPS(1)PR	DCS(-109.7)Y(-111.8)Y(-103.65)GVCPS(103.65)PR	10	2	-0.18382	7848800		3143800	12117000	9297400		9582000	3563900		25918000	13216000	21536000
BGIOSGA001338-PA	33.537	304	BGIOSGA001338-PA	180	pep chromosome:ASM465v1:1:25112539:25114963:-1 gene:BGIOSGA001338 transcript:BGIOSGA001338-TA gene-biotype:protein-coding transcript-biotype:protein-coding	BGIOSGA001338-PA	180	180	S	VDNDAAKRKRANDTTSEEPDNTKRPNNLSVN	54.827	54.827	ANDT(0.002)T(0.17)S(0.823)EEPDNT(0.005)K	ANDT(-25.55)T(-6.84)S(6.84)EEPDNT(-22.28)K	6	2	-0.11129										6007000
BGIOSGA001340-PA	56.848	499	BGIOSGA001340-PA	282	pep chromosome:ASM465v1:1:25070629:25074910:-1 gene:BGIOSGA001340 transcript:BGIOSGA001340-TA gene-biotype:protein-coding transcript-biotype:protein-coding	BGIOSGA001340-PA	282	282	S	ALVSKKSDFRELEHDSETDDYPDDENEEDFD	140.41	120.27	ELEHDS(0.983)ET(0.017)DDYPDDENEEDFDNR	ELEHDS(17.58)ET(-17.58)DDY(-52.71)PDDENEEDFDNR	6	3	-0.15915
BGIOSGA001340-PA	56.848	499	BGIOSGA001340-PA	338	pep chromosome:ASM465v1:1:25070629:25074910:-1 gene:BGIOSGA001340 transcript:BGIOSGA001340-TA gene-biotype:protein-coding transcript-biotype:protein-coding	BGIOSGA001340-PA	338	338	S	TDKAHRKDKELPVHRSDDDNDDDNEDHQLTK	148.66	127.92	DKELPVHRS(1)DDDNDDDNEDHQLTK	DKELPVHRS(91.22)DDDNDDDNEDHQLT(-91.22)K	9	3	0.35816	24498000	27308000	38749000		65223000	15196000	57520000	31369000	45199000	60267000	45659000	53313000
BGIOSGA001340-PA	56.848	499	BGIOSGA001340-PA	284	pep chromosome:ASM465v1:1:25070629:25074910:-1 gene:BGIOSGA001340 transcript:BGIOSGA001340-TA gene-biotype:protein-coding transcript-biotype:protein-coding	BGIOSGA001340-PA	284	284	T	VSKKSDFRELEHDSETDDYPDDENEEDFDNR	126.48	126.48	ELEHDS(0.5)ET(0.5)DDYPDDENEEDFDNR	ELEHDS(0)ET(0)DDY(-37.02)PDDENEEDFDNR	8	2	1.2087
BGIOSGA001347-PA	42.25	394	BGIOSGA001347-PA	327	pep chromosome:ASM465v1:1:24993063:24994532:-1 gene:BGIOSGA001347 transcript:BGIOSGA001347-TA gene-biotype:protein-coding transcript-biotype:protein-coding	BGIOSGA001347-PA	327	327	S	LEAETARARSDVGASSYGREAPSRYHALRPY	50.116	50.116	SDVGAS(0.441)S(0.559)YGR	S(-38.07)DVGAS(-1.04)S(1.04)Y(-34.53)GR	7	2	-0.27516				974010	3880400	8835900
BGIOSGA001347-PA	42.25	394	BGIOSGA001347-PA	321	pep chromosome:ASM465v1:1:24993063:24994532:-1 gene:BGIOSGA001347 transcript:BGIOSGA001347-TA gene-biotype:protein-coding transcript-biotype:protein-coding	BGIOSGA001347-PA	321	321	S	AAASRLLEAETARARSDVGASSYGREAPSRY	84.195	53.193	ARS(0.999)DVGASSYGR	ARS(33.02)DVGAS(-33.02)S(-34.17)Y(-43.4)GR	3	2	0.61824					13376000		50431000	25529000				12379000
BGIOSGA001347-PA	42.25	394	BGIOSGA001347-PA	374	pep chromosome:ASM465v1:1:24993063:24994532:-1 gene:BGIOSGA001347 transcript:BGIOSGA001347-TA gene-biotype:protein-coding transcript-biotype:protein-coding	BGIOSGA001347-PA	374	374	S	SPEKRELRRRSEELRSPASMFAGARDNRMHQ	63.436	63.436	S(0.017)EELRS(0.968)PAS(0.015)MFAGAR	S(-17.62)EELRS(17.62)PAS(-18.05)MFAGAR	6	3	-0.1234
BGIOSGA001347-PA	42.25	394	BGIOSGA001347-PA	369	pep chromosome:ASM465v1:1:24993063:24994532:-1 gene:BGIOSGA001347 transcript:BGIOSGA001347-TA gene-biotype:protein-coding transcript-biotype:protein-coding	BGIOSGA001347-PA	369	369	S	DGPRASPEKRELRRRSEELRSPASMFAGARD	144.47	132.22	RRS(1)EELR	RRS(132.22)EELR	3	2	-0.0019589		8306400	11191000	25587000		35927000	128090000	32445000	26684000	14178000		12732000
BGIOSGA001363-PA	123.57	1118	BGIOSGA001363-PA	694	pep chromosome:ASM465v1:1:24508432:24525521:-1 gene:BGIOSGA001363 transcript:BGIOSGA001363-TA gene-biotype:protein-coding transcript-biotype:protein-coding	BGIOSGA001363-PA	694	694	S	VATGKGQQPPSYGMASPRALDVSDESQQPAE	105.99	105.99	GQQPPSYGMAS(1)PR	GQQPPS(-38.74)Y(-59.17)GMAS(38.74)PR	11	2	-0.57131	26716000	28044000	26719000		11025000	10108000	19156000	10761000	9778900	19138000	9396100	17227000
BGIOSGA001363-PA	123.57	1118	BGIOSGA001363-PA	468	pep chromosome:ASM465v1:1:24508432:24525521:-1 gene:BGIOSGA001363 transcript:BGIOSGA001363-TA gene-biotype:protein-coding transcript-biotype:protein-coding	BGIOSGA001363-PA	468	468	S	QLLAVASGASKQVPNSPSIPIIGGGPKVESL	52.823	52.823	QVPNS(0.974)PS(0.026)IPIIGGGPK	QVPNS(15.73)PS(-15.73)IPIIGGGPK	5	2	-0.13422				10124000
BGIOSGA001363-PA	123.57	1118	BGIOSGA001363-PA	484	pep chromosome:ASM465v1:1:24508432:24525521:-1 gene:BGIOSGA001363 transcript:BGIOSGA001363-TA gene-biotype:protein-coding transcript-biotype:protein-coding	BGIOSGA001363-PA	484	484	S	PSIPIIGGGPKVESLSPRERAAERERMVLDI	149.82	141.48	VESLS(1)PR	VES(-50.16)LS(50.16)PR	5	2	-0.11701	89241000	119180000	128870000	74128000	74129000	85761000	73882000	37484000	44917000	147050000	70082000	110890000
BGIOSGA001364-PA	20.731	201	BGIOSGA001364-PA	176	pep chromosome:ASM465v1:1:24453332:24456208:-1 gene:BGIOSGA001364 transcript:BGIOSGA001364-TA gene-biotype:protein-coding transcript-biotype:protein-coding	BGIOSGA001364-PA	176	176	S	VAAAPSPVRSVVKASSSSSSSSSSTTDAKCK	103.88	103.88	AS(0.011)S(0.982)S(0.007)S(0.001)SSSSSSTTDAK	AS(-19.71)S(19.71)S(-21.35)S(-32.34)S(-39.84)S(-47)S(-53.84)S(-60.32)S(-65.07)S(-69.68)T(-74.15)T(-74.15)DAK	3	2	-0.10416										10875000
BGIOSGA001388-PA	34.744	307	BGIOSGA001388-PA	259	pep chromosome:ASM465v1:1:24012746:24016939:-1 gene:BGIOSGA001388 transcript:BGIOSGA001388-TA gene-biotype:protein-coding transcript-biotype:protein-coding	BGIOSGA001388-PA	259	259	S	DVPPGKMGRVIGRKGSSIMEVKASCNVEIHI	83.214	82.705	KGS(0.923)S(0.077)IMEVK	KGS(10.82)S(-10.82)IMEVK	3	2	-0.034102			3685500	14293000		2723500
BGIOSGA001412-PA	24.934	221	BGIOSGA001412-PA	100	pep chromosome:ASM465v1:1:23527972:23530831:-1 gene:BGIOSGA001412 transcript:BGIOSGA001412-TA gene-biotype:protein-coding transcript-biotype:protein-coding	BGIOSGA001412-PA	100	100	S	KGTLKRVTTGNAQQGSREELLESGMAETLGV	105.65	105.65	VTTGNAQQGS(1)R	VT(-86.79)T(-63.57)GNAQQGS(63.57)R	10	2	-1.6545			15587000							18329000	7035800	13106000
BGIOSGA001422-PA	45.627	428	BGIOSGA001422-PA	26	pep chromosome:ASM465v1:1:23347944:23352564:-1 gene:BGIOSGA001422 transcript:BGIOSGA001422-TA gene-biotype:protein-coding transcript-biotype:protein-coding	BGIOSGA001422-PA	26	26	S	HPHGRSRTAHNMSSSSLRKKSDAALVRKVPV	55.776	55.776	TAHNMS(0.144)S(0.233)S(0.233)S(0.389)LR	T(-45.82)AHNMS(-4.31)S(-2.22)S(-2.22)S(2.22)LR	9	2	1.2869
BGIOSGA001429-PA	19.578	181	BGIOSGA001429-PA	167	pep chromosome:ASM465v1:1:23218836:23219658:-1 gene:BGIOSGA001429 transcript:BGIOSGA001429-TA gene-biotype:protein-coding transcript-biotype:protein-coding	BGIOSGA001429-PA	167	167	S	ITYNVKKTVRNSQSVSITKPLQSSAKSKLK-	65.905	65.905	NS(0.008)QS(0.076)VS(0.755)IT(0.16)KPLQS(0.001)SAK	NS(-19.78)QS(-9.99)VS(6.75)IT(-6.75)KPLQS(-28.72)S(-32.91)AK	6	2	-0.11696											10979000
BGIOSGA001429-PA	19.578	181	BGIOSGA001429-PA	165	pep chromosome:ASM465v1:1:23218836:23219658:-1 gene:BGIOSGA001429 transcript:BGIOSGA001429-TA gene-biotype:protein-coding transcript-biotype:protein-coding	BGIOSGA001429-PA	165	165	S	LSITYNVKKTVRNSQSVSITKPLQSSAKSKL	157.37	85.576	NS(0.018)QS(0.979)VS(0.002)ITKPLQSSAK	NS(-17.25)QS(17.25)VS(-25.97)IT(-39.69)KPLQS(-61.68)S(-65.32)AK	4	2	0.13194				2331500			9331400			20634000	7739600	15970000
BGIOSGA001433-PA	240.99	2212	BGIOSGA001433-PA	2094	pep chromosome:ASM465v1:1:23081864:23094333:-1 gene:BGIOSGA001433 transcript:BGIOSGA001433-TA gene-biotype:protein-coding transcript-biotype:protein-coding	BGIOSGA001433-PA	2094	2094	S	HHRSSNEHDVKASSTSMHDTKSGTSNGVSNS	67.999	67.999	AS(0.001)S(0.131)T(0.093)S(0.767)MHDT(0.008)K	AS(-31.02)S(-7.69)T(-9.17)S(7.69)MHDT(-19.56)K	5	2	-1.0308
BGIOSGA001451-PA	62.144	568	BGIOSGA001451-PA;BGIOSGA001450-PA	30;103	pep chromosome:ASM465v1:1:22696252:22701704:-1 gene:BGIOSGA001451 transcript:BGIOSGA001451-TA gene-biotype:protein-coding transcript-biotype:protein-coding;pep chromosome:ASM465v1:1:22715796:22731195:-1 gene:BGIOSGA001450 transcript:BGIOSGA001450-TA gene-b	BGIOSGA001451-PA	30	30	S	VDKDKGNGKVHFRDSSPQEAFRTYKRRRQPR	58.37	58.37	DS(0.143)S(0.857)PQEAFR	DS(-7.76)S(7.76)PQEAFR	3	2	0.26035	1473300			11393000			4556700
BGIOSGA001460-PA	31.862	290	BGIOSGA001460-PA	10	pep chromosome:ASM465v1:1:22582940:22585400:-1 gene:BGIOSGA001460 transcript:BGIOSGA001460-TA gene-biotype:protein-coding transcript-biotype:protein-coding	BGIOSGA001460-PA	10	10	S	------MGRESAAACSPKPKLRRGLWSPEED	50.897	42.314	MGRES(0.43)AAACS(0.57)PKPK	MGRES(-1.23)AAACS(1.23)PKPK	10	3	-0.95323							31006000	13255000	18912000
BGIOSGA001460-PA	31.862	290	BGIOSGA001460-PA	5	pep chromosome:ASM465v1:1:22582940:22585400:-1 gene:BGIOSGA001460 transcript:BGIOSGA001460-TA gene-biotype:protein-coding transcript-biotype:protein-coding	BGIOSGA001460-PA	5	5	S	-----------MGRESAAACSPKPKLRRGLW	50.897	41.088	MGRES(0.5)AAACS(0.5)PKPK	MGRES(0)AAACS(0)PKPK	5	3	-0.5781							31006000	13255000	18912000
BGIOSGA001480-PA	87.851	768	BGIOSGA001480-PA	754	pep chromosome:ASM465v1:1:21950957:21959382:-1 gene:BGIOSGA001480 transcript:BGIOSGA001480-TA gene-biotype:protein-coding transcript-biotype:protein-coding	BGIOSGA001480-PA	754	754	S	RQSRRNTPVPSKYNGSESPSLAEIVNDQRL-	229.02	229.02	YNGS(1)ES(1)PSLAEIVNDQR	Y(-84.87)NGS(84.87)ES(38.84)PS(-38.84)LAEIVNDQR	4	2	-0.77974	46483000	66763000	31598000	23529000
BGIOSGA001480-PA	87.851	768	BGIOSGA001480-PA	758	pep chromosome:ASM465v1:1:21950957:21959382:-1 gene:BGIOSGA001480 transcript:BGIOSGA001480-TA gene-biotype:protein-coding transcript-biotype:protein-coding	BGIOSGA001480-PA	758	758	S	RNTPVPSKYNGSESPSLAEIVNDQRL-----	63.608	63.608	Y(0.001)NGS(0.281)ES(0.281)PS(0.436)LAEIVNDQR	Y(-26.44)NGS(-1.9)ES(-1.9)PS(1.9)LAEIVNDQR	8	3	-0.62322
BGIOSGA001480-PA	87.851	768	BGIOSGA001480-PA	756	pep chromosome:ASM465v1:1:21950957:21959382:-1 gene:BGIOSGA001480 transcript:BGIOSGA001480-TA gene-biotype:protein-coding transcript-biotype:protein-coding	BGIOSGA001480-PA	756	756	S	SRRNTPVPSKYNGSESPSLAEIVNDQRL---	229.02	209.12	YNGS(1)ES(1)PSLAEIVNDQR	Y(-60.71)NGS(60.71)ES(43.46)PS(-43.46)LAEIVNDQR	6	2	-0.22804	104960000	128740000	113570000	23529000	21845000	60660000
BGIOSGA001480-PA	87.851	768	BGIOSGA001480-PA	745	pep chromosome:ASM465v1:1:21950957:21959382:-1 gene:BGIOSGA001480 transcript:BGIOSGA001480-TA gene-biotype:protein-coding transcript-biotype:protein-coding	BGIOSGA001480-PA	745	745	T	AEQVLVATKRQSRRNTPVPSKYNGSESPSLA	119.34	119.34	RNT(1)PVPSK	RNT(65.27)PVPS(-65.27)K	3	2	0.43817	112160000	223630000	210540000	122300000	114970000	173460000	111240000	64458000	93095000	254500000	133190000	244880000
BGIOSGA001480-PA	87.851	768	BGIOSGA001480-PA	751	pep chromosome:ASM465v1:1:21950957:21959382:-1 gene:BGIOSGA001480 transcript:BGIOSGA001480-TA gene-biotype:protein-coding transcript-biotype:protein-coding	BGIOSGA001480-PA	751	751	Y	ATKRQSRRNTPVPSKYNGSESPSLAEIVNDQ	102.66	84.365	Y(0.998)NGS(0.998)ES(0.004)PSLAEIVNDQR	Y(27.94)NGS(26.84)ES(-26.84)PS(-39.94)LAEIVNDQR	1	2	0.5662	21701000	23846000		23529000
BGIOSGA001480-PA	87.851	768	BGIOSGA001480-PA	723	pep chromosome:ASM465v1:1:21950957:21959382:-1 gene:BGIOSGA001480 transcript:BGIOSGA001480-TA gene-biotype:protein-coding transcript-biotype:protein-coding	BGIOSGA001480-PA	723	723	S	YIHPVFKGDEDDEKFSISDEPEAEQVLVATK	105.02	97.974	GDEDDEKFS(0.992)IS(0.008)DEPEAEQVLVATK	GDEDDEKFS(20.93)IS(-20.93)DEPEAEQVLVAT(-80.01)K	9	2	4.1575		101480000	53109000	132050000	34730000	22971000			37832000	50214000	49801000	43381000
BGIOSGA001480-PA	87.851	768	BGIOSGA001480-PA	50	pep chromosome:ASM465v1:1:21950957:21959382:-1 gene:BGIOSGA001480 transcript:BGIOSGA001480-TA gene-biotype:protein-coding transcript-biotype:protein-coding	BGIOSGA001480-PA	50	50	S	DRVYFPKWYLKGARESPSHGGAFVRKFVNLD	181.44	157.77	ES(1)PSHGGAFVR	ES(36.16)PS(-36.16)HGGAFVR	2	2	0.035578	768440000	1004400000	1489800000	1135800000	693850000	954660000	265080000	143450000	151290000	672850000	420810000	683360000
BGIOSGA001491-PA	13.039	119	BGIOSGA001491-PA	14	pep chromosome:ASM465v1:1:21784438:21785276:-1 gene:BGIOSGA001491 transcript:BGIOSGA001491-TA gene-biotype:protein-coding transcript-biotype:protein-coding	BGIOSGA001491-PA	14	14	S	--MATGGGGLSGPQPSLRRGLSRAFTMRPEG	106.35	106.35	ATGGGGLS(0.001)GPQPS(0.999)LR	AT(-96.78)GGGGLS(-32.55)GPQPS(32.55)LR	13	2	0.12846	2573700	11310000		8285400
BGIOSGA001495-PA	116.78	1026	BGIOSGA001495-PA	396	pep chromosome:ASM465v1:1:21688483:21700839:-1 gene:BGIOSGA001495 transcript:BGIOSGA001495-TA gene-biotype:protein-coding transcript-biotype:protein-coding	BGIOSGA001495-PA	396	396	T	WQFQGKINVTPVEDKTSEEEPVTYANKLEAK	59.429	58.418	INVT(0.001)PVEDKT(0.551)S(0.439)EEEPVT(0.009)YANK	INVT(-28.94)PVEDKT(0.99)S(-0.99)EEEPVT(-17.74)Y(-38.55)ANK	10	3	0.279	23231000
BGIOSGA001495-PA	116.78	1026	BGIOSGA001495-PA	390	pep chromosome:ASM465v1:1:21688483:21700839:-1 gene:BGIOSGA001495 transcript:BGIOSGA001495-TA gene-biotype:protein-coding transcript-biotype:protein-coding	BGIOSGA001495-PA	390	390	T	ARPKRPWQFQGKINVTPVEDKTSEEEPVTYA	118.23	57.39	INVT(1)PVEDK	INVT(57.39)PVEDK	4	2	0.17859		7895300	2853000	10486000		8304800				8847700	6736600	8136300
BGIOSGA001495-PA	116.78	1026	BGIOSGA001495-PA	933	pep chromosome:ASM465v1:1:21688483:21700839:-1 gene:BGIOSGA001495 transcript:BGIOSGA001495-TA gene-biotype:protein-coding transcript-biotype:protein-coding	BGIOSGA001495-PA	933	933	S	KDEMDIDAVDADSHGSKDKKREKDKEKKHKR	51.029	51.029	DEMDIDAVDADS(0.198)HGS(0.802)KDK	DEMDIDAVDADS(-6.08)HGS(6.08)KDK	15	3	0.53535			8416500
BGIOSGA001495-PA	116.78	1026	BGIOSGA001495-PA	987	pep chromosome:ASM465v1:1:21688483:21700839:-1 gene:BGIOSGA001495 transcript:BGIOSGA001495-TA gene-biotype:protein-coding transcript-biotype:protein-coding	BGIOSGA001495-PA	987	987	S	RHSSDRKKSRKHTHASDSDSENRHKRHKKDR	171.99	171.99	HTHAS(0.998)DS(0.001)DSENR	HT(-45.49)HAS(28.44)DS(-28.44)DS(-43.32)ENR	5	2	-0.073599							1173400	9875900		23220000	2535000
BGIOSGA001495-PA	116.78	1026	BGIOSGA001495-PA	397	pep chromosome:ASM465v1:1:21688483:21700839:-1 gene:BGIOSGA001495 transcript:BGIOSGA001495-TA gene-biotype:protein-coding transcript-biotype:protein-coding	BGIOSGA001495-PA	397	397	S	QFQGKINVTPVEDKTSEEEPVTYANKLEAKN	95.153	95.153	INVTPVEDKT(0.193)S(0.801)EEEPVT(0.005)YANK	INVT(-47.6)PVEDKT(-6.18)S(6.18)EEEPVT(-21.76)Y(-57.6)ANK	11	3	0.55315		19148000	18375000								9415700
BGIOSGA001495-PA	116.78	1026	BGIOSGA001495-PA	930	pep chromosome:ASM465v1:1:21688483:21700839:-1 gene:BGIOSGA001495 transcript:BGIOSGA001495-TA gene-biotype:protein-coding transcript-biotype:protein-coding	BGIOSGA001495-PA	930	930	S	RSRKDEMDIDAVDADSHGSKDKKREKDKEKK	78.244	66.019	KDEMDIDAVDADS(0.816)HGS(0.184)K	KDEMDIDAVDADS(6.46)HGS(-6.46)K	13	3	-0.41847		4637400	6318700
BGIOSGA001495-PA	116.78	1026	BGIOSGA001495-PA	989	pep chromosome:ASM465v1:1:21688483:21700839:-1 gene:BGIOSGA001495 transcript:BGIOSGA001495-TA gene-biotype:protein-coding transcript-biotype:protein-coding	BGIOSGA001495-PA	989	989	S	SSDRKKSRKHTHASDSDSENRHKRHKKDRDS	85.536	83.351	HT(0.047)HAS(0.953)DS(0.965)DS(0.035)ENR	HT(-13.08)HAS(13.08)DS(14.5)DS(-14.5)ENR	7	2	0.46842								7853300	3299800	18630000	11248000
BGIOSGA001502-PA	48.115	425	BGIOSGA001502-PA	139	pep chromosome:ASM465v1:1:21300234:21302198:-1 gene:BGIOSGA001502 transcript:BGIOSGA001502-TA gene-biotype:protein-coding transcript-biotype:protein-coding	BGIOSGA001502-PA	139	139	S	CSKLRPGAQQPVNIDSGDEEAPTVRTEKRLT	98.627	93.147	LRPGAQQPVNIDS(1)GDEEAPTVR	LRPGAQQPVNIDS(37.56)GDEEAPT(-37.56)VR	13	3	-0.95201	18523000	29269000		21325000	27203000		15626000			53049000	28233000
BGIOSGA001506-PA	101.42	907	BGIOSGA001506-PA	99	pep chromosome:ASM465v1:1:21186200:21193888:-1 gene:BGIOSGA001506 transcript:BGIOSGA001506-TA gene-biotype:protein-coding transcript-biotype:protein-coding	BGIOSGA001506-PA	99	99	S	EAEEAEAEQKQLDAPSPGVARKRVAQPSRVR	53.448	46.88	QLDAPS(1)PGVAR	QLDAPS(46.88)PGVAR	6	2	-0.27552
BGIOSGA001506-PA	101.42	907	BGIOSGA001506-PA	5	pep chromosome:ASM465v1:1:21186200:21193888:-1 gene:BGIOSGA001506 transcript:BGIOSGA001506-TA gene-biotype:protein-coding transcript-biotype:protein-coding	BGIOSGA001506-PA	5	5	S	-----------MAPSSPSSAAAPTRTSTRKR	83.869	83.869	APS(0.096)S(0.904)PSSAAAPTR	APS(-9.74)S(9.74)PS(-37.21)S(-41.48)AAAPT(-61.38)R	4	2	0.10145		6265100
BGIOSGA001528-PA	26.122	236	BGIOSGA001528-PA	119	pep chromosome:ASM465v1:1:20431678:20432897:-1 gene:BGIOSGA001528 transcript:BGIOSGA001528-TA gene-biotype:protein-coding transcript-biotype:protein-coding	BGIOSGA001528-PA	119	119	S	PQLRGCGVLAIKSSPSSLSSYNCETCSRVLL	65.563	64.65	S(0.071)S(0.071)PS(0.729)S(0.124)LS(0.004)S(0.001)Y(0.001)NCETCSR	S(-10.13)S(-10.13)PS(7.7)S(-7.7)LS(-22.55)S(-29.64)Y(-29.69)NCET(-39.8)CS(-45.52)R	4	2	-0.018086					11142000
BGIOSGA001528-PA	26.122	236	BGIOSGA001528-PA	117	pep chromosome:ASM465v1:1:20431678:20432897:-1 gene:BGIOSGA001528 transcript:BGIOSGA001528-TA gene-biotype:protein-coding transcript-biotype:protein-coding	BGIOSGA001528-PA	117	117	S	ERPQLRGCGVLAIKSSPSSLSSYNCETCSRV	179.56	162.7	S(0.227)S(0.722)PS(0.051)SLSSYNCETCSR	S(-5.02)S(5.02)PS(-11.48)S(-37.35)LS(-76.17)S(-104.05)Y(-127.06)NCET(-128.32)CS(-136.11)R	2	2	-0.73726		106500000
BGIOSGA001528-PA	26.122	236	BGIOSGA001528-PA	120	pep chromosome:ASM465v1:1:20431678:20432897:-1 gene:BGIOSGA001528 transcript:BGIOSGA001528-TA gene-biotype:protein-coding transcript-biotype:protein-coding	BGIOSGA001528-PA	120	120	S	QLRGCGVLAIKSSPSSLSSYNCETCSRVLLD	65.563	65.563	S(0.248)S(0.248)PS(0.248)S(0.248)LS(0.007)S(0.001)YNCETCSR	S(0)S(0)PS(0)S(0)LS(-15.36)S(-22.75)Y(-30.56)NCET(-54.95)CS(-51.9)R	5	2	-0.6689
BGIOSGA001528-PA	26.122	236	BGIOSGA001528-PA	116	pep chromosome:ASM465v1:1:20431678:20432897:-1 gene:BGIOSGA001528 transcript:BGIOSGA001528-TA gene-biotype:protein-coding transcript-biotype:protein-coding	BGIOSGA001528-PA	116	116	S	NERPQLRGCGVLAIKSSPSSLSSYNCETCSR	179.56	179.56	S(0.497)S(0.497)PS(0.006)SLSSYNCETCSR	S(0)S(0)PS(-18.91)S(-57.23)LS(-106.89)S(-125.27)Y(-150.93)NCET(-148.47)CS(-157.16)R	1	2	-0.91368
BGIOSGA001540-PA	51.63	485	BGIOSGA001540-PA	364	pep chromosome:ASM465v1:1:20074686:20082100:-1 gene:BGIOSGA001540 transcript:BGIOSGA001540-TA gene-biotype:protein-coding transcript-biotype:protein-coding	BGIOSGA001540-PA	364	364	S	IVVDMIPPDQTIRHPSPPKKINKLKSLIFRK	118.67	52.255	HPS(1)PPKK	HPS(52.26)PPKK	3	2	0.66611							15220000	13492000	12872000	67084000	32174000	77927000
BGIOSGA001544-PA	29.064	266	BGIOSGA001544-PA	52	pep chromosome:ASM465v1:1:19965996:19966796:-1 gene:BGIOSGA001544 transcript:BGIOSGA001544-TA gene-biotype:protein-coding transcript-biotype:protein-coding	BGIOSGA001544-PA	52	52	S	HAPVSGTAKGKAKLKSGQQLKRNTIGAKKGG	99.53	99.53	LKS(1)GQQLK	LKS(99.53)GQQLK	3	2	0.13038	13023000	17166000	16553000	33968000	36414000	20025000	18988000	10411000	15365000	54380000	28045000	40904000
BGIOSGA001545-PA	17.922	167	BGIOSGA001545-PA	3	pep chromosome:ASM465v1:1:19961446:19963824:-1 gene:BGIOSGA001545 transcript:BGIOSGA001545-TA gene-biotype:protein-coding transcript-biotype:protein-coding	BGIOSGA001545-PA	3	3	S	-------------MASPSAPGPKLQKAMVAV	77.14	65.719	AS(0.998)PS(0.002)APGPK	AS(28.16)PS(-28.16)APGPK	2	2	2.2685		23191000	21662000	21237000		29528000	20326000		9992200	11653000	11129000
BGIOSGA001573-PA	89.793	797	BGIOSGA001573-PA	336	pep chromosome:ASM465v1:1:18974830:18983026:-1 gene:BGIOSGA001573 transcript:BGIOSGA001573-TA gene-biotype:protein-coding transcript-biotype:protein-coding	BGIOSGA001573-PA	336	336	S	KAAPGPPAEVRYQHASSMGAVETRKGKTMSG	113.4	81.128	Y(0.003)QHAS(0.722)S(0.27)MGAVET(0.005)R	Y(-23.24)QHAS(4.28)S(-4.28)MGAVET(-21.52)R	5	2	0.28572			116910000					26184000			55010000
BGIOSGA001573-PA	89.793	797	BGIOSGA001573-PA	213	pep chromosome:ASM465v1:1:18974830:18983026:-1 gene:BGIOSGA001573 transcript:BGIOSGA001573-TA gene-biotype:protein-coding transcript-biotype:protein-coding	BGIOSGA001573-PA	213	213	S	GSSPVTPPPPPRPNPSPPATRTTPPPPMPEP	125.68	125.68	VMMGSVGSSPVT(0.003)PPPPPRPNPS(0.825)PPAT(0.172)R	VMMGS(-80.76)VGS(-69.91)S(-50.91)PVT(-25)PPPPPRPNPS(6.81)PPAT(-6.81)R	22	3	0.74339	30825000	55569000	48490000	53125000	28213000	44897000					33927000
BGIOSGA001573-PA	89.793	797	BGIOSGA001573-PA	712	pep chromosome:ASM465v1:1:18974830:18983026:-1 gene:BGIOSGA001573 transcript:BGIOSGA001573-TA gene-biotype:protein-coding transcript-biotype:protein-coding	BGIOSGA001573-PA	712	712	S	RYMERKASQGEDANNSEVAEAVNSDPVADRK	64.885	64.885	KAS(0.185)QGEDANNS(0.815)EVAEAVNSDPVADRK	KAS(-6.45)QGEDANNS(6.45)EVAEAVNS(-58.52)DPVADRK	11	3	3.0561												22176000
BGIOSGA001573-PA	89.793	797	BGIOSGA001573-PA	337	pep chromosome:ASM465v1:1:18974830:18983026:-1 gene:BGIOSGA001573 transcript:BGIOSGA001573-TA gene-biotype:protein-coding transcript-biotype:protein-coding	BGIOSGA001573-PA	337	337	S	AAPGPPAEVRYQHASSMGAVETRKGKTMSGT	174.68	174.68	YQHAS(0.037)S(0.963)MGAVETR	Y(-109.33)QHAS(-14.18)S(14.18)MGAVET(-83.4)R	6	2	-0.1688	175420000	129350000		182120000	82357000	90889000	53969000		60176000	4827300	55010000	55540000
BGIOSGA001573-PA	89.793	797	BGIOSGA001573-PA	704	pep chromosome:ASM465v1:1:18974830:18983026:-1 gene:BGIOSGA001573 transcript:BGIOSGA001573-TA gene-biotype:protein-coding transcript-biotype:protein-coding	BGIOSGA001573-PA	704	704	S	AQFEEWHQRYMERKASQGEDANNSEVAEAVN	71.308	58.272	KAS(0.899)QGEDANNS(0.101)EVAEAVNSDPVADR	KAS(9.5)QGEDANNS(-9.5)EVAEAVNS(-40.62)DPVADR	3	3	-3.1152	6863100				14602000	6482400					7631400	14559000
BGIOSGA001573-PA	89.793	797	BGIOSGA001573-PA	409	pep chromosome:ASM465v1:1:18974830:18983026:-1 gene:BGIOSGA001573 transcript:BGIOSGA001573-TA gene-biotype:protein-coding transcript-biotype:protein-coding	BGIOSGA001573-PA	409	409	T	SRGHIDHSTKIMHVITWNRSFKNLPNQDDFG	70.942	55.452	IMHVIT(1)WNR	IMHVIT(55.45)WNR	6	2	0.048614
BGIOSGA001573-PA	89.793	797	BGIOSGA001573-PA	620	pep chromosome:ASM465v1:1:18974830:18983026:-1 gene:BGIOSGA001573 transcript:BGIOSGA001573-TA gene-biotype:protein-coding transcript-biotype:protein-coding	BGIOSGA001573-PA	620	620	S	KLNLIPIESNLKEKVSSPPRLVEPPIKDLLY	80.688	80.688	EKVS(0.794)S(0.206)PPR	EKVS(5.85)S(-5.85)PPR	4	2	-1.6505		6769200				6006700		17634000
BGIOSGA001573-PA	89.793	797	BGIOSGA001573-PA	199	pep chromosome:ASM465v1:1:18974830:18983026:-1 gene:BGIOSGA001573 transcript:BGIOSGA001573-TA gene-biotype:protein-coding transcript-biotype:protein-coding	BGIOSGA001573-PA	199	199	S	VHGQPQKRVMMGSVGSSPVTPPPPPRPNPSP	70.666	70.666	VMMGS(0.006)VGS(0.534)S(0.445)PVT(0.016)PPPPPRPNPSPPATR	VMMGS(-19.76)VGS(0.79)S(-0.79)PVT(-15.3)PPPPPRPNPS(-45.13)PPAT(-44.82)R	8	3	-0.73365	12133000	14982000	9853500	20282000		21826000
BGIOSGA001573-PA	89.793	797	BGIOSGA001573-PA	200	pep chromosome:ASM465v1:1:18974830:18983026:-1 gene:BGIOSGA001573 transcript:BGIOSGA001573-TA gene-biotype:protein-coding transcript-biotype:protein-coding	BGIOSGA001573-PA	200	200	S	HGQPQKRVMMGSVGSSPVTPPPPPRPNPSPP	57.144	57.144	VMMGS(0.014)VGS(0.221)S(0.691)PVT(0.073)PPPPPRPNPSPPATR	VMMGS(-17.01)VGS(-4.95)S(4.95)PVT(-9.76)PPPPPRPNPS(-34.95)PPAT(-39.7)R	9	3	0.71645					15885000
BGIOSGA001573-PA	89.793	797	BGIOSGA001573-PA	115	pep chromosome:ASM465v1:1:18974830:18983026:-1 gene:BGIOSGA001573 transcript:BGIOSGA001573-TA gene-biotype:protein-coding transcript-biotype:protein-coding	BGIOSGA001573-PA	115	115	S	PPFLDFSHATLQRSSSTPNIPMPDPKAATKT	125.53	111.38	S(0.002)S(0.002)S(0.988)T(0.009)PNIPMPDPK	S(-27.91)S(-27.91)S(20.62)T(-20.62)PNIPMPDPK	3	2	0.12178	83324000	106470000	119440000	169500000	100050000	94227000	56229000	28741000	33864000	65314000	36027000	37591000
BGIOSGA001573-PA	89.793	797	BGIOSGA001573-PA	621	pep chromosome:ASM465v1:1:18974830:18983026:-1 gene:BGIOSGA001573 transcript:BGIOSGA001573-TA gene-biotype:protein-coding transcript-biotype:protein-coding	BGIOSGA001573-PA	621	621	S	LNLIPIESNLKEKVSSPPRLVEPPIKDLLYA	80.102	80.102	EKVS(0.493)S(0.507)PPR	EKVS(-0.13)S(0.13)PPR	5	2	-1.8356			10732000
BGIOSGA001573-PA	89.793	797	BGIOSGA001573-PA	203	pep chromosome:ASM465v1:1:18974830:18983026:-1 gene:BGIOSGA001573 transcript:BGIOSGA001573-TA gene-biotype:protein-coding transcript-biotype:protein-coding	BGIOSGA001573-PA	203	203	T	PQKRVMMGSVGSSPVTPPPPPRPNPSPPATR	46.415	46.415	VMMGSVGS(0.003)S(0.01)PVT(0.53)PPPPPRPNPS(0.35)PPAT(0.107)R	VMMGS(-32.4)VGS(-22.62)S(-17.15)PVT(1.8)PPPPPRPNPS(-1.8)PPAT(-6.94)R	12	3	1.454						12377000
BGIOSGA001609-PA	49.196	427	BGIOSGA001609-PA	281	pep chromosome:ASM465v1:1:17430224:17435936:-1 gene:BGIOSGA001609 transcript:BGIOSGA001609-TA gene-biotype:protein-coding transcript-biotype:protein-coding	BGIOSGA001609-PA	281	281	T	ASKESPATTVASDKGTPVPSSSSQEKDALIK	51.479	51.479	ESPAT(0.004)T(0.009)VAS(0.299)DKGT(0.678)PVPS(0.005)S(0.002)S(0.002)S(0.002)QEK	ES(-40.81)PAT(-22.1)T(-18.8)VAS(-3.56)DKGT(3.56)PVPS(-21.68)S(-26.17)S(-25.67)S(-25.16)QEK	13	3	-0.39771				4613900	13581000	13036000	27678000	11119000			7639700	24464000
BGIOSGA001609-PA	49.196	427	BGIOSGA001609-PA	277	pep chromosome:ASM465v1:1:17430224:17435936:-1 gene:BGIOSGA001609 transcript:BGIOSGA001609-TA gene-biotype:protein-coding transcript-biotype:protein-coding	BGIOSGA001609-PA	277	277	S	SDTNASKESPATTVASDKGTPVPSSSSQEKD	45.836	45.836	ESPAT(0.007)T(0.018)VAS(0.605)DKGT(0.348)PVPS(0.009)S(0.005)S(0.004)S(0.004)QEK	ES(-31.46)PAT(-19.61)T(-15.24)VAS(2.4)DKGT(-2.4)PVPS(-18.37)S(-20.56)S(-22.11)S(-21.52)QEK	9	3	-0.73736		22672000
BGIOSGA001609-PA	49.196	427	BGIOSGA001609-PA	270	pep chromosome:ASM465v1:1:17430224:17435936:-1 gene:BGIOSGA001609 transcript:BGIOSGA001609-TA gene-biotype:protein-coding transcript-biotype:protein-coding	BGIOSGA001609-PA	270	270	S	SFTHRRTSDTNASKESPATTVASDKGTPVPS	80.238	80.238	TSDTNAS(0.209)KES(0.782)PAT(0.006)T(0.001)VASDK	T(-33.05)S(-33.05)DT(-31.95)NAS(-5.72)KES(5.72)PAT(-20.96)T(-27.63)VAS(-48.34)DK	10	2	0.1818				4150500		2267000			6074500			11879000
BGIOSGA001609-PA	49.196	427	BGIOSGA001609-PA	286	pep chromosome:ASM465v1:1:17430224:17435936:-1 gene:BGIOSGA001609 transcript:BGIOSGA001609-TA gene-biotype:protein-coding transcript-biotype:protein-coding	BGIOSGA001609-PA	286	286	S	PATTVASDKGTPVPSSSSQEKDALIKAESDN	65.038	65.038	GTPVPS(0.306)S(0.306)S(0.194)S(0.194)QEKDALIK	GT(-48.46)PVPS(0)S(0)S(-1.98)S(-1.98)QEKDALIK	7	2	-0.46615
BGIOSGA001609-PA	49.196	427	BGIOSGA001609-PA	285	pep chromosome:ASM465v1:1:17430224:17435936:-1 gene:BGIOSGA001609 transcript:BGIOSGA001609-TA gene-biotype:protein-coding transcript-biotype:protein-coding	BGIOSGA001609-PA	285	285	S	SPATTVASDKGTPVPSSSSQEKDALIKAESD	65.038	65.038	GTPVPS(0.306)S(0.306)S(0.194)S(0.194)QEKDALIK	GT(-48.46)PVPS(0)S(0)S(-1.98)S(-1.98)QEKDALIK	6	2	-0.46615
BGIOSGA001615-PA	66.475	591	BGIOSGA001615-PA	287	pep chromosome:ASM465v1:1:17204283:17207650:-1 gene:BGIOSGA001615 transcript:BGIOSGA001615-TA gene-biotype:protein-coding transcript-biotype:protein-coding	BGIOSGA001615-PA	287	287	S	GIVGLPNVGKSSLINSLKRSRVVNVGSTPGV	92.866	92.866	SSLINS(1)LKR	S(-75.63)S(-71.47)LINS(71.47)LKR	6	2	-0.12085										3185400	3266600	7268700
BGIOSGA001615-PA	66.475	591	BGIOSGA001615-PA	501	pep chromosome:ASM465v1:1:17204283:17207650:-1 gene:BGIOSGA001615 transcript:BGIOSGA001615-TA gene-biotype:protein-coding transcript-biotype:protein-coding	BGIOSGA001615-PA	501	501	S	KKQNEPAQENHDESMSDANEREGAKTASAST	107.75	95.138	QNEPAQENHDES(0.04)MS(0.96)DANER	QNEPAQENHDES(-13.83)MS(13.83)DANER	14	3	0.11056
BGIOSGA001615-PA	66.475	591	BGIOSGA001615-PA	499	pep chromosome:ASM465v1:1:17204283:17207650:-1 gene:BGIOSGA001615 transcript:BGIOSGA001615-TA gene-biotype:protein-coding transcript-biotype:protein-coding	BGIOSGA001615-PA	499	499	S	DGKKQNEPAQENHDESMSDANEREGAKTASA	59.814	59.814	QNEPAQENHDES(0.602)MS(0.398)DANER	QNEPAQENHDES(1.8)MS(-1.8)DANER	12	3	0.56325				5508700	6278800
BGIOSGA001615-PA	66.475	591	BGIOSGA001615-PA	299	pep chromosome:ASM465v1:1:17204283:17207650:-1 gene:BGIOSGA001615 transcript:BGIOSGA001615-TA gene-biotype:protein-coding transcript-biotype:protein-coding	BGIOSGA001615-PA	299	299	T	LINSLKRSRVVNVGSTPGVTRSMQEVQLDKK	62.162	62.162	VVNVGS(0.057)T(0.887)PGVT(0.057)R	VVNVGS(-11.94)T(11.94)PGVT(-11.94)R	7	2	0.47627										7387200
BGIOSGA001615-PA	66.475	591	BGIOSGA001615-PA	331	pep chromosome:ASM465v1:1:17204283:17207650:-1 gene:BGIOSGA001615 transcript:BGIOSGA001615-TA gene-biotype:protein-coding transcript-biotype:protein-coding	BGIOSGA001615-PA	331	331	S	KLLDCPGVVMLKSSNSGVSVALRNCKRVEKM	116.03	92.856	SSNS(1)GVSVALR	S(-36.73)S(-38.33)NS(36.73)GVS(-44.29)VALR	4	2	0.20971		1086900								28563000	13435000	49457000
BGIOSGA001615-PA	66.475	591	BGIOSGA001615-PA	373	pep chromosome:ASM465v1:1:17204283:17207650:-1 gene:BGIOSGA001615 transcript:BGIOSGA001615-TA gene-biotype:protein-coding transcript-biotype:protein-coding	BGIOSGA001615-PA	373	373	T	DLCPHEKLLSLYRVPTFTSVDDFLQKVATLR	142.77	142.77	VPT(1)FTSVDDFLQK	VPT(38.36)FT(-38.36)S(-53.31)VDDFLQK	3	2	-0.6582										56739000	63866000	84737000
BGIOSGA001620-PA	62.574	559	BGIOSGA001620-PA	221	pep chromosome:ASM465v1:1:17018546:17022008:-1 gene:BGIOSGA001620 transcript:BGIOSGA001620-TA gene-biotype:protein-coding transcript-biotype:protein-coding	BGIOSGA001620-PA	221	221	S	HAEKVEKELKENPAPSESDIDAARVVVKEKG	53.403	53.403	ENPAPS(0.755)ES(0.245)DIDAAR	ENPAPS(4.88)ES(-4.88)DIDAAR	6	2	0.66671	5714700		4073100
BGIOSGA001633-PA	82.981	711	BGIOSGA001633-PA	211	pep chromosome:ASM465v1:1:16769949:16777708:-1 gene:BGIOSGA001633 transcript:BGIOSGA001633-TA gene-biotype:protein-coding transcript-biotype:protein-coding	BGIOSGA001633-PA	211	211	S	ECLKREKERVAHYLHSSSEQKLLEKVQHELL	46.206	46.206	VAHYLHS(0.333)S(0.333)S(0.333)EQK	VAHY(-38.17)LHS(0)S(0)S(0)EQK	7	3	-0.28719
BGIOSGA001633-PA	82.981	711	BGIOSGA001633-PA;BGIOSGA018797-PA;BGIOSGA003530-PA	586;619;590	pep chromosome:ASM465v1:1:16769949:16777708:-1 gene:BGIOSGA001633 transcript:BGIOSGA001633-TA gene-biotype:protein-coding transcript-biotype:protein-coding;pep chromosome:ASM465v1:5:3077409:3083451:-1 gene:BGIOSGA018797 transcript:BGIOSGA018797-TA gene-bio	BGIOSGA001633-PA;BGIOSGA018797-PA	586;619	586	S	LNLSDDDVVRLLHSLSCAKYKILNKEPANRS;LNLSDDDVVRLLHSLSCAKYKILSKEPNNRS	104.05	104.05	LLHS(0.004)LS(0.996)CAK	LLHS(-24.06)LS(24.06)CAK	6	2	-0.29041										12737000	4642900	14076000
BGIOSGA001633-PA	82.981	711	BGIOSGA001633-PA	212	pep chromosome:ASM465v1:1:16769949:16777708:-1 gene:BGIOSGA001633 transcript:BGIOSGA001633-TA gene-biotype:protein-coding transcript-biotype:protein-coding	BGIOSGA001633-PA	212	212	S	CLKREKERVAHYLHSSSEQKLLEKVQHELLT	46.206	46.206	VAHYLHS(0.333)S(0.333)S(0.333)EQK	VAHY(-38.17)LHS(0)S(0)S(0)EQK	8	3	-0.28719
BGIOSGA001633-PA	82.981	711	BGIOSGA001633-PA	213	pep chromosome:ASM465v1:1:16769949:16777708:-1 gene:BGIOSGA001633 transcript:BGIOSGA001633-TA gene-biotype:protein-coding transcript-biotype:protein-coding	BGIOSGA001633-PA	213	213	S	LKREKERVAHYLHSSSEQKLLEKVQHELLTQ	46.206	46.206	VAHYLHS(0.333)S(0.333)S(0.333)EQK	VAHY(-38.17)LHS(0)S(0)S(0)EQK	9	3	-0.28719
BGIOSGA001636-PA	144.54	1259	BGIOSGA001636-PA;BGIOSGA019187-PA	449;502	pep chromosome:ASM465v1:1:16702308:16712260:-1 gene:BGIOSGA001636 transcript:BGIOSGA001636-TA gene-biotype:protein-coding transcript-biotype:protein-coding description:Chromatin-remodeling complex ATPase [Source:UniProtKB/TrEMBL;Acc:B8A881];pep chromosome:	BGIOSGA001636-PA;BGIOSGA019187-PA	449;502	449	S	QLHKVLRPFLLRRLKSDVEKGLPPKKETILK	115.91	115.91	LKS(1)DVEK	LKS(115.91)DVEK	3	2	0.44163								879340		96294000	42086000	56885000
BGIOSGA001636-PA	144.54	1259	BGIOSGA001636-PA	1238	pep chromosome:ASM465v1:1:16702308:16712260:-1 gene:BGIOSGA001636 transcript:BGIOSGA001636-TA gene-biotype:protein-coding transcript-biotype:protein-coding description:Chromatin-remodeling complex ATPase [Source:UniProtKB/TrEMBL;Acc:B8A881]	BGIOSGA001636-PA	1238	1238	S	RSALRVSEGETTPSNSFKRRRQSLMDDYVGS	119.96	84.759	VSEGETTPS(0.032)NS(0.968)FK	VS(-82.2)EGET(-47.15)T(-42.44)PS(-14.84)NS(14.84)FK	11	2	0.97574	8528700	6089500	13055000	3180800	3350900		9278400	6307600	5050100	38686000	13495000	35104000
BGIOSGA001636-PA	144.54	1259	BGIOSGA001636-PA	225	pep chromosome:ASM465v1:1:16702308:16712260:-1 gene:BGIOSGA001636 transcript:BGIOSGA001636-TA gene-biotype:protein-coding transcript-biotype:protein-coding description:Chromatin-remodeling complex ATPase [Source:UniProtKB/TrEMBL;Acc:B8A881]	BGIOSGA001636-PA	225	225	S	DALAGSGGTRLLSQPSCIKGKMRDYQLAGLN	69.672	69.672	LLS(0.001)QPS(0.999)CIK	LLS(-32.97)QPS(32.97)CIK	6	2	-0.013904										8872300	1413000	15215000
BGIOSGA001636-PA	144.54	1259	BGIOSGA001636-PA	1234	pep chromosome:ASM465v1:1:16702308:16712260:-1 gene:BGIOSGA001636 transcript:BGIOSGA001636-TA gene-biotype:protein-coding transcript-biotype:protein-coding description:Chromatin-remodeling complex ATPase [Source:UniProtKB/TrEMBL;Acc:B8A881]	BGIOSGA001636-PA	1234	1234	T	TPTKRSALRVSEGETTPSNSFKRRRQSLMDD	119.17	89.26	VSEGET(0.054)T(0.86)PS(0.032)NS(0.054)FKR	VS(-66.12)EGET(-12.06)T(12.02)PS(-14.24)NS(-12.02)FKR	7	2	1.0278		6089500	3413400	3180800	3350900			2166000		62295000	25146000	20545000
BGIOSGA001636-PA	144.54	1259	BGIOSGA001636-PA	1233	pep chromosome:ASM465v1:1:16702308:16712260:-1 gene:BGIOSGA001636 transcript:BGIOSGA001636-TA gene-biotype:protein-coding transcript-biotype:protein-coding description:Chromatin-remodeling complex ATPase [Source:UniProtKB/TrEMBL;Acc:B8A881]	BGIOSGA001636-PA	1233	1233	T	MTPTKRSALRVSEGETTPSNSFKRRRQSLMD	98.654	98.654	VSEGET(0.735)T(0.267)PS(0.225)NS(0.772)FKR	VS(-55.1)EGET(4.12)T(-4.12)PS(-5)NS(5)FKR	6	2	0.26483												24293000
BGIOSGA001636-PA	144.54	1259	BGIOSGA001636-PA	1236	pep chromosome:ASM465v1:1:16702308:16712260:-1 gene:BGIOSGA001636 transcript:BGIOSGA001636-TA gene-biotype:protein-coding transcript-biotype:protein-coding description:Chromatin-remodeling complex ATPase [Source:UniProtKB/TrEMBL;Acc:B8A881]	BGIOSGA001636-PA	1236	1236	S	TKRSALRVSEGETTPSNSFKRRRQSLMDDYV	50.806	41.621	VSEGET(0.005)T(0.013)PS(0.491)NS(0.491)FK	VS(-39.31)EGET(-20.27)T(-15.89)PS(0)NS(0)FK	9	2	0.31118
BGIOSGA001639-PA	44.717	382	BGIOSGA001639-PA	36	pep chromosome:ASM465v1:1:16616422:16619353:-1 gene:BGIOSGA001639 transcript:BGIOSGA001639-TA gene-biotype:protein-coding transcript-biotype:protein-coding	BGIOSGA001639-PA	36	36	S	PRPENEVGKLATSQNSPVRRRSRSPGKHESN	202.68	202.68	LATSQNS(1)PVR	LAT(-118.63)S(-95.13)QNS(95.13)PVR	7	2	-0.025868	862130000	731630000	1198200000	655290000	430000000	574160000	385070000	193110000	278670000	559490000	379900000	433030000
BGIOSGA001639-PA	44.717	382	BGIOSGA001639-PA	70	pep chromosome:ASM465v1:1:16616422:16619353:-1 gene:BGIOSGA001639 transcript:BGIOSGA001639-TA gene-biotype:protein-coding transcript-biotype:protein-coding	BGIOSGA001639-PA	70	70	S	ASSRELSPHGRQNSPSPPEKKARREHRHGDG	128.88	57.225	QNS(1)PS(1)PPEKK	QNS(57.23)PS(57.23)PPEKK	5	2	-0.20748	7368600			28860000	15700000		22738000		7465000	10010000
BGIOSGA001639-PA	44.717	382	BGIOSGA001639-PA	68	pep chromosome:ASM465v1:1:16616422:16619353:-1 gene:BGIOSGA001639 transcript:BGIOSGA001639-TA gene-biotype:protein-coding transcript-biotype:protein-coding	BGIOSGA001639-PA	68	68	S	RRASSRELSPHGRQNSPSPPEKKARREHRHG	169.81	57.225	QNS(1)PS(1)PPEKK	QNS(57.23)PS(57.23)PPEKK	3	2	-0.20748	59190000	23196000	30900000	69484000	24820000	16294000	40411000	8157700	18578000	27480000	11051000	12869000
BGIOSGA001639-PA	44.717	382	BGIOSGA001639-PA	61	pep chromosome:ASM465v1:1:16616422:16619353:-1 gene:BGIOSGA001639 transcript:BGIOSGA001639-TA gene-biotype:protein-coding transcript-biotype:protein-coding	BGIOSGA001639-PA	61	61	S	GKHESNRRRASSRELSPHGRQNSPSPPEKKA	88.294	72.038	ELS(1)PHGR	ELS(72.04)PHGR	3	2	0.41204	220510000	373690000	575850000	167250000	218060000	284930000	181310000	112060000	122820000	348040000	228670000	202520000
BGIOSGA001639-PA	44.717	382	BGIOSGA001639-PA	273	pep chromosome:ASM465v1:1:16616422:16619353:-1 gene:BGIOSGA001639 transcript:BGIOSGA001639-TA gene-biotype:protein-coding transcript-biotype:protein-coding	BGIOSGA001639-PA	273	273	S	HHRRSPRRHSPRRRSSPSSHRHHSPRRPWSP	73.841	73.841	RS(0.007)S(0.986)PS(0.004)S(0.003)HR	RS(-21.67)S(21.67)PS(-23.47)S(-25.75)HR	3	2	0.1385	1810700	11739000			305140	88783
BGIOSGA001639-PA	44.717	382	BGIOSGA001639-PA	33	pep chromosome:ASM465v1:1:16616422:16619353:-1 gene:BGIOSGA001639 transcript:BGIOSGA001639-TA gene-biotype:protein-coding transcript-biotype:protein-coding	BGIOSGA001639-PA	33	33	S	LDSPRPENEVGKLATSQNSPVRRRSRSPGKH	47.712	45.357	LAT(0.071)S(0.947)QNS(0.982)PVR	LAT(-12.42)S(12.42)QNS(17.15)PVR	4	2	0.48421	5447200	2798500	51457000	5575900	18762000		20297000		1069700	20594000		15244000
BGIOSGA001639-PA	44.717	382	BGIOSGA001639-PA	3	pep chromosome:ASM465v1:1:16616422:16619353:-1 gene:BGIOSGA001639 transcript:BGIOSGA001639-TA gene-biotype:protein-coding transcript-biotype:protein-coding	BGIOSGA001639-PA	3	3	S	-------------MVSLPVGRSPRTHSPKEL	63.076	59.153	MVS(1)LPVGR	MVS(59.15)LPVGR	3	2	0.17494
BGIOSGA001639-PA	44.717	382	BGIOSGA001639-PA	9	pep chromosome:ASM465v1:1:16616422:16619353:-1 gene:BGIOSGA001639 transcript:BGIOSGA001639-TA gene-biotype:protein-coding transcript-biotype:protein-coding	BGIOSGA001639-PA	9	9	S	-------MVSLPVGRSPRTHSPKELDSPRPE	121.45	121.45	MVSLPVGRS(1)PR	MVS(-56.27)LPVGRS(56.27)PR	9	2	-0.576				93671000		5922300	37668000	7253700	11586000	12597000
BGIOSGA001639-PA	44.717	382	BGIOSGA001639-PA	56	pep chromosome:ASM465v1:1:16616422:16619353:-1 gene:BGIOSGA001639 transcript:BGIOSGA001639-TA gene-biotype:protein-coding transcript-biotype:protein-coding	BGIOSGA001639-PA	56	56	S	RSRSPGKHESNRRRASSRELSPHGRQNSPSP	61.212	61.212	AS(0.63)S(0.364)RELS(0.005)PHGR	AS(2.38)S(-2.38)RELS(-20.66)PHGR	2	3	0.060324								5782800
BGIOSGA001639-PA	44.717	382	BGIOSGA001639-PA	287	pep chromosome:ASM465v1:1:16616422:16619353:-1 gene:BGIOSGA001639 transcript:BGIOSGA001639-TA gene-biotype:protein-coding transcript-biotype:protein-coding	BGIOSGA001639-PA	287	287	S	SSPSSHRHHSPRRPWSPPANRKTGLGKPGRN	136.02	123.62	RPWS(1)PPANR	RPWS(123.62)PPANR	4	2	-0.063805	126510000	128000000	151840000	144210000	76515000	62322000	88557000	36997000	41383000	113200000	65791000	75142000
BGIOSGA001639-PA	44.717	382	BGIOSGA001639-PA	57	pep chromosome:ASM465v1:1:16616422:16619353:-1 gene:BGIOSGA001639 transcript:BGIOSGA001639-TA gene-biotype:protein-coding transcript-biotype:protein-coding	BGIOSGA001639-PA	57	57	S	SRSPGKHESNRRRASSRELSPHGRQNSPSPP	55.885	55.885	AS(0.148)S(0.751)RELS(0.101)PHGR	AS(-7.06)S(7.06)RELS(-8.7)PHGR	3	3	0.40546
BGIOSGA001639-PA	44.717	382	BGIOSGA001639-PA	20	pep chromosome:ASM465v1:1:16616422:16619353:-1 gene:BGIOSGA001639 transcript:BGIOSGA001639-TA gene-biotype:protein-coding transcript-biotype:protein-coding	BGIOSGA001639-PA	20	20	S	PVGRSPRTHSPKELDSPRPENEVGKLATSQN	271.53	109.91	T(0.001)HS(0.999)PKELDS(1)PRPENEVGK	T(-30.67)HS(30.67)PKELDS(77.98)PRPENEVGK	9	3	0.94244	721400000	876280000	919860000	427970000	435820000	384140000	502100000	195270000	243110000	453740000	284580000	300890000
BGIOSGA001639-PA	44.717	382	BGIOSGA001639-PA	14	pep chromosome:ASM465v1:1:16616422:16619353:-1 gene:BGIOSGA001639 transcript:BGIOSGA001639-TA gene-biotype:protein-coding transcript-biotype:protein-coding	BGIOSGA001639-PA	14	14	S	--MVSLPVGRSPRTHSPKELDSPRPENEVGK	114.57	109.91	T(0.001)HS(0.999)PKELDS(1)PRPENEVGK	T(-30.67)HS(30.67)PKELDS(77.98)PRPENEVGK	3	3	0.94244	97012000	85043000	93293000	96240000	83856000	66918000	11895000	42716000	73794000	70401000	35492000	46644000
BGIOSGA001639-PA	44.717	382	BGIOSGA001639-PA	44	pep chromosome:ASM465v1:1:16616422:16619353:-1 gene:BGIOSGA001639 transcript:BGIOSGA001639-TA gene-biotype:protein-coding transcript-biotype:protein-coding	BGIOSGA001639-PA	44	44	S	KLATSQNSPVRRRSRSPGKHESNRRRASSRE	73.722	51.727	S(1)RS(0.999)PGKHES(0.001)NR	S(39.61)RS(32.16)PGKHES(-32.16)NR	3	3	-0.14579	1888500	7586800	16895000	39341000	8075700
BGIOSGA001639-PA	44.717	382	BGIOSGA001639-PA	12	pep chromosome:ASM465v1:1:16616422:16619353:-1 gene:BGIOSGA001639 transcript:BGIOSGA001639-TA gene-biotype:protein-coding transcript-biotype:protein-coding	BGIOSGA001639-PA	12	12	T	----MVSLPVGRSPRTHSPKELDSPRPENEV	109.19	109.19	T(0.713)HS(0.287)PKELDS(1)PRPENEVGK	T(3.95)HS(-3.95)PKELDS(51.36)PRPENEVGK	1	3	-0.057913							216400000				5797300
BGIOSGA001639-PA	44.717	382	BGIOSGA001639-PA	165	pep chromosome:ASM465v1:1:16616422:16619353:-1 gene:BGIOSGA001639 transcript:BGIOSGA001639-TA gene-biotype:protein-coding transcript-biotype:protein-coding	BGIOSGA001639-PA	165	165	S	RRDSPSRRRDSPRRDSPLRRRDSPRRASPSR	81.95	67.881	RDS(1)PLRR	RDS(67.88)PLRR	3	3	-0.43805	5273300		13861000	5261300	7694300		37700000	26572000	53635000	75621000	32266000	61421000
BGIOSGA001639-PA	44.717	382	BGIOSGA001639-PA	275	pep chromosome:ASM465v1:1:16616422:16619353:-1 gene:BGIOSGA001639 transcript:BGIOSGA001639-TA gene-biotype:protein-coding transcript-biotype:protein-coding	BGIOSGA001639-PA	275	275	S	RRSPRRHSPRRRSSPSSHRHHSPRRPWSPPA	68.626	68.626	RS(0.046)S(0.301)PS(0.651)S(0.001)HR	RS(-11.48)S(-3.35)PS(3.35)S(-28.13)HR	5	3	-0.23305				5616400
BGIOSGA001639-PA	44.717	382	BGIOSGA001639-PA	42	pep chromosome:ASM465v1:1:16616422:16619353:-1 gene:BGIOSGA001639 transcript:BGIOSGA001639-TA gene-biotype:protein-coding transcript-biotype:protein-coding	BGIOSGA001639-PA	42	42	S	VGKLATSQNSPVRRRSRSPGKHESNRRRASS	51.727	51.727	S(1)RS(0.999)PGKHES(0.001)NR	S(39.61)RS(32.16)PGKHES(-32.16)NR	1	3	-0.14579	1888500	7586800	4478900	39341000	8075700
BGIOSGA001663-PA	101.76	905	BGIOSGA001663-PA	682	pep chromosome:ASM465v1:1:16227193:16232195:-1 gene:BGIOSGA001663 transcript:BGIOSGA001663-TA gene-biotype:protein-coding transcript-biotype:protein-coding gene-symbol:RBOHB description:Respiratory burst oxidase homolog protein B [Source:UniProtKB/Swiss-Pr	BGIOSGA001663-PA	682	682	S	RTVFSEACRPPTEGESGLLRADLSKGITDEK	75.797	75.797	TVFSEACRPPT(0.177)EGES(0.823)GLLR	T(-67.41)VFS(-48.06)EACRPPT(-6.66)EGES(6.66)GLLR	15	3	0.04525				18194000		3499100
BGIOSGA001663-PA	101.76	905	BGIOSGA001663-PA	140	pep chromosome:ASM465v1:1:16227193:16232195:-1 gene:BGIOSGA001663 transcript:BGIOSGA001663-TA gene-biotype:protein-coding transcript-biotype:protein-coding gene-symbol:RBOHB description:Respiratory burst oxidase homolog protein B [Source:UniProtKB/Swiss-Pr	BGIOSGA001663-PA	140	140	S	QQSAKRVRKRLDRTKSSAAVALKGLQFVTAK	87.719	55.064	S(0.822)S(0.178)AAVALK	S(6.64)S(-6.64)AAVALK	1	2	0.24814
BGIOSGA001682-PA	56.078	497	BGIOSGA001682-PA	136	pep chromosome:ASM465v1:1:15904346:15908188:-1 gene:BGIOSGA001682 transcript:BGIOSGA001682-TA gene-biotype:protein-coding transcript-biotype:protein-coding	BGIOSGA001682-PA	136	136	S	LGSALPRSNPSCFTPSPSSPQHPRSLGLEQY	206.62	206.62	SNPSCFTPS(0.938)PS(0.043)S(0.019)PQHPR	S(-149.88)NPS(-116.2)CFT(-44.63)PS(13.43)PS(-13.43)S(-16.85)PQHPR	9	2	-0.20556	51193000						28407000		3491800	51319000
BGIOSGA001682-PA	56.078	497	BGIOSGA001682-PA	138	pep chromosome:ASM465v1:1:15904346:15908188:-1 gene:BGIOSGA001682 transcript:BGIOSGA001682-TA gene-biotype:protein-coding transcript-biotype:protein-coding	BGIOSGA001682-PA	138	138	S	SALPRSNPSCFTPSPSSPQHPRSLGLEQYVE	149.95	149.95	SNPSCFT(0.017)PS(0.274)PS(0.556)S(0.152)PQHPR	S(-89.71)NPS(-46.95)CFT(-15.02)PS(-3.07)PS(3.07)S(-5.62)PQHPR	11	2	0.54197												34882000
BGIOSGA001682-PA	56.078	497	BGIOSGA001682-PA	139	pep chromosome:ASM465v1:1:15904346:15908188:-1 gene:BGIOSGA001682 transcript:BGIOSGA001682-TA gene-biotype:protein-coding transcript-biotype:protein-coding	BGIOSGA001682-PA	139	139	S	ALPRSNPSCFTPSPSSPQHPRSLGLEQYVEL	187.5	90.729	SNPSCFTPS(0.006)PS(0.032)S(0.961)PQHPR	S(-66.44)NPS(-56.64)CFT(-48.23)PS(-21.78)PS(-14.74)S(14.74)PQHPR	12	3	-0.18313	59313000	80493000	79145000	45857000	31235000	34229000	23958000	9391300		43656000	29065000	35141000
BGIOSGA001731-PA	91.239	806	BGIOSGA001731-PA	612	pep chromosome:ASM465v1:1:14560974:14576017:-1 gene:BGIOSGA001731 transcript:BGIOSGA001731-TA gene-biotype:protein-coding transcript-biotype:protein-coding	BGIOSGA001731-PA	612	612	S	ERGLEKEEEDYFNEDSDEEDSVRRTKHAQKQ	128.01	128.01	GLEKEEEDYFNEDS(1)DEEDSVR	GLEKEEEDY(-50.59)FNEDS(35.08)DEEDS(-35.08)VR	14	2	2.7118		19873000	32739000			16529000		10632000	18244000
BGIOSGA001741-PA	15.673	152	BGIOSGA001741-PA	105	pep chromosome:ASM465v1:1:14183886:14184891:-1 gene:BGIOSGA001741 transcript:BGIOSGA001741-TA gene-biotype:protein-coding transcript-biotype:protein-coding	BGIOSGA001741-PA	105	105	S	AEKQLAGPPDPLGYGSRSIGANGDVGELEYL	54.982	54.982	QLAGPPDPLGY(1)GS(1)R	QLAGPPDPLGY(54.98)GS(54.98)R	13	2	0.8561									22707000	14053000
BGIOSGA001769-PA	22.964	210	BGIOSGA001769-PA;BGIOSGA019139-PA;BGIOSGA001851-PA	53;181;53	pep chromosome:ASM465v1:1:13491536:13492168:-1 gene:BGIOSGA001769 transcript:BGIOSGA001769-TA gene-biotype:protein-coding transcript-biotype:protein-coding;pep chromosome:ASM465v1:5:2284385:2288406:1 gene:BGIOSGA019139 transcript:BGIOSGA019139-TA gene-biot	BGIOSGA001769-PA	53	53	S	PDKYLDEKTIFHLNPSGRFVIGGPHGDAGLT	82.505	82.505	TIFHLNPS(1)GR	T(-77.36)IFHLNPS(77.36)GR	8	2	0.14135										79499000	23393000	69095000
BGIOSGA001783-PA	93.258	862	BGIOSGA001783-PA	80	pep chromosome:ASM465v1:1:13321576:13325968:-1 gene:BGIOSGA001783 transcript:BGIOSGA001783-TA gene-biotype:protein-coding transcript-biotype:protein-coding	BGIOSGA001783-PA	80	80	S	SPLRPAAVPFRATPASPQPAPFASRGGGYSS	83.292	80.507	ATPAS(1)PQPAPFASR	AT(-40.56)PAS(40.56)PQPAPFAS(-57.11)R	5	2	-0.45554	12437000				2065100	13652000	29308000	14257000	14794000	46508000	22155000	29413000
BGIOSGA001789-PA	22.56	213	BGIOSGA001789-PA	24	pep chromosome:ASM465v1:1:12972232:12972873:-1 gene:BGIOSGA001789 transcript:BGIOSGA001789-TA gene-biotype:protein-coding transcript-biotype:protein-coding	BGIOSGA001789-PA	24	24	S	GGAGAPGSASDGGEYSPKPSKPLSWLTRAAR	47.195	47.195	GGAGAPGS(0.002)AS(0.006)DGGEY(0.013)S(0.783)PKPS(0.101)KPLS(0.044)WLT(0.052)R	GGAGAPGS(-26.62)AS(-21.34)DGGEY(-17.85)S(8.91)PKPS(-8.91)KPLS(-12.48)WLT(-11.82)R	16	3	-2.0527
BGIOSGA001792-PA	20.346	181	BGIOSGA001792-PA	6	pep chromosome:ASM465v1:1:12867043:12870219:-1 gene:BGIOSGA001792 transcript:BGIOSGA001792-TA gene-biotype:protein-coding transcript-biotype:protein-coding	BGIOSGA001792-PA	6	6	S	----------MFKKFSFEDISAQNQVKASVQ	238.39	238.39	KFS(1)FEDISAQNQVK	KFS(102.18)FEDIS(-102.18)AQNQVK	3	2	-0.311	31018000	17586000		47395000		9683000				65017000
BGIOSGA001811-PA	17.862	172	BGIOSGA001811-PA	17	pep chromosome:ASM465v1:1:12295414:12296689:-1 gene:BGIOSGA001811 transcript:BGIOSGA001811-TA gene-biotype:protein-coding transcript-biotype:protein-coding	BGIOSGA001811-PA	17	17	S	SSSRLDTWTLKEEVASMDKRWLVDLGHPLVN	86.344	86.344	EEVAS(1)MDKR	EEVAS(86.34)MDKR	5	2	-0.51011			7851500	14575000	5245700	10306000
BGIOSGA001839-PA	41.821	380	BGIOSGA001839-PA	363	pep chromosome:ASM465v1:1:11804023:11806075:-1 gene:BGIOSGA001839 transcript:BGIOSGA001839-TA gene-biotype:protein-coding transcript-biotype:protein-coding	BGIOSGA001839-PA	363	363	S	PSSEQAPIRRVRCCKSLSSEALCNLKKWLEP	99.506	99.506	S(0.808)LS(0.188)S(0.004)EALCNLK	S(6.34)LS(-6.34)S(-22.82)EALCNLK	1	2	1.3759
BGIOSGA001839-PA	41.821	380	BGIOSGA001839-PA	365	pep chromosome:ASM465v1:1:11804023:11806075:-1 gene:BGIOSGA001839 transcript:BGIOSGA001839-TA gene-biotype:protein-coding transcript-biotype:protein-coding	BGIOSGA001839-PA	365	365	S	SEQAPIRRVRCCKSLSSEALCNLKKWLEPNE	103.65	85.417	S(0.006)LS(0.981)S(0.014)EALCNLK	S(-22.33)LS(18.58)S(-18.58)EALCNLK	3	2	0.060679	6410100			10255000		9013500		6773900	6670000		9688400	14996000
BGIOSGA001856-PA	138.05	1285	BGIOSGA001856-PA	655	pep chromosome:ASM465v1:1:11548733:11554292:-1 gene:BGIOSGA001856 transcript:BGIOSGA001856-TA gene-biotype:protein-coding transcript-biotype:protein-coding	BGIOSGA001856-PA	655	655	S	SDRKGDSGARSGKQLSINQSASRSRRSSRDN	62.694	62.694	QLS(1)INQSASR	QLS(41.69)INQS(-41.69)AS(-43.05)R	3	2	-1.7333	2436100			8003700
BGIOSGA001858-PA	55.652	512	BGIOSGA001858-PA	509	pep chromosome:ASM465v1:1:11514541:11521349:-1 gene:BGIOSGA001858 transcript:BGIOSGA001858-TA gene-biotype:protein-coding transcript-biotype:protein-coding	BGIOSGA001858-PA	509	509	S	IKADAPKSTKITFGDSDED------------	154.75	150.62	ITFGDS(1)DED	IT(-107.47)FGDS(107.47)DED	6	1	0.83629	17941000	27867000	56156000	20184000	24167000	25149000
BGIOSGA001905-PA	96.73	871	BGIOSGA001905-PA	842	pep chromosome:ASM465v1:1:10553183:10558687:-1 gene:BGIOSGA001905 transcript:BGIOSGA001905-TA gene-biotype:protein-coding transcript-biotype:protein-coding	BGIOSGA001905-PA	842	842	S	VSQFIKFDEMSETSSSHGGHTSAGSAPVLEL	71.44	71.44	FDEMS(0.754)ET(0.291)S(0.554)S(0.554)S(0.826)HGGHT(0.014)S(0.005)AGS(0.001)APVLELPR	FDEMS(4.99)ET(-4.99)S(0)S(0)S(5.43)HGGHT(-19.83)S(-25.43)AGS(-35.65)APVLELPR	10	3	-0.36044
BGIOSGA001905-PA	96.73	871	BGIOSGA001905-PA	841	pep chromosome:ASM465v1:1:10553183:10558687:-1 gene:BGIOSGA001905 transcript:BGIOSGA001905-TA gene-biotype:protein-coding transcript-biotype:protein-coding	BGIOSGA001905-PA	841	841	S	QVSQFIKFDEMSETSSSHGGHTSAGSAPVLE	77.522	61.417	FDEMS(0.596)ET(0.596)S(0.596)S(0.596)S(0.596)HGGHT(0.013)S(0.006)AGS(0.001)APVLELPR	FDEMS(0)ET(0)S(0)S(0)S(0)HGGHT(-19.73)S(-24.05)AGS(-36.09)APVLELPR	9	3	-0.28706
BGIOSGA001905-PA	96.73	871	BGIOSGA001905-PA	131	pep chromosome:ASM465v1:1:10553183:10558687:-1 gene:BGIOSGA001905 transcript:BGIOSGA001905-TA gene-biotype:protein-coding transcript-biotype:protein-coding	BGIOSGA001905-PA	131	131	S	NEFTVVLEDFNTGKSSANGGSPGNDSPGNDR	47.242	47.242	S(0.451)S(0.451)ANGGS(0.098)PGNDS(0.001)PGNDR	S(0)S(0)ANGGS(-6.63)PGNDS(-27.75)PGNDR	2	2	3.2646
BGIOSGA001905-PA	96.73	871	BGIOSGA001905-PA	130	pep chromosome:ASM465v1:1:10553183:10558687:-1 gene:BGIOSGA001905 transcript:BGIOSGA001905-TA gene-biotype:protein-coding transcript-biotype:protein-coding	BGIOSGA001905-PA	130	130	S	NNEFTVVLEDFNTGKSSANGGSPGNDSPGND	47.242	47.242	S(0.451)S(0.451)ANGGS(0.098)PGNDS(0.001)PGNDR	S(0)S(0)ANGGS(-6.63)PGNDS(-27.75)PGNDR	1	2	3.2646
BGIOSGA001905-PA	96.73	871	BGIOSGA001905-PA	840	pep chromosome:ASM465v1:1:10553183:10558687:-1 gene:BGIOSGA001905 transcript:BGIOSGA001905-TA gene-biotype:protein-coding transcript-biotype:protein-coding	BGIOSGA001905-PA	840	840	S	AQVSQFIKFDEMSETSSSHGGHTSAGSAPVL	77.522	61.417	FDEMS(0.596)ET(0.596)S(0.596)S(0.596)S(0.596)HGGHT(0.013)S(0.006)AGS(0.001)APVLELPR	FDEMS(0)ET(0)S(0)S(0)S(0)HGGHT(-19.73)S(-24.05)AGS(-36.09)APVLELPR	8	3	-0.28706
BGIOSGA001905-PA	96.73	871	BGIOSGA001905-PA	141	pep chromosome:ASM465v1:1:10553183:10558687:-1 gene:BGIOSGA001905 transcript:BGIOSGA001905-TA gene-biotype:protein-coding transcript-biotype:protein-coding	BGIOSGA001905-PA	141	141	S	NTGKSSANGGSPGNDSPGNDRKRVRRSYQTK	235.53	103.45	SSANGGS(1)PGNDS(1)PGNDR	S(-44.29)S(-43.59)ANGGS(43.59)PGNDS(90.22)PGNDR	12	2	-0.85168	19233000	16729000	30793000	3868300	14146000	23473000	23560000		3129700			57016000
BGIOSGA001905-PA	96.73	871	BGIOSGA001905-PA	837	pep chromosome:ASM465v1:1:10553183:10558687:-1 gene:BGIOSGA001905 transcript:BGIOSGA001905-TA gene-biotype:protein-coding transcript-biotype:protein-coding	BGIOSGA001905-PA	837	837	S	LAAAQVSQFIKFDEMSETSSSHGGHTSAGSA	71.44	71.44	FDEMS(0.754)ET(0.291)S(0.554)S(0.554)S(0.826)HGGHT(0.014)S(0.005)AGS(0.001)APVLELPR	FDEMS(4.99)ET(-4.99)S(0)S(0)S(5.43)HGGHT(-19.83)S(-25.43)AGS(-35.65)APVLELPR	5	3	-0.36044
BGIOSGA001905-PA	96.73	871	BGIOSGA001905-PA	839	pep chromosome:ASM465v1:1:10553183:10558687:-1 gene:BGIOSGA001905 transcript:BGIOSGA001905-TA gene-biotype:protein-coding transcript-biotype:protein-coding	BGIOSGA001905-PA	839	839	T	AAQVSQFIKFDEMSETSSSHGGHTSAGSAPV	77.522	61.417	FDEMS(0.596)ET(0.596)S(0.596)S(0.596)S(0.596)HGGHT(0.013)S(0.006)AGS(0.001)APVLELPR	FDEMS(0)ET(0)S(0)S(0)S(0)HGGHT(-19.73)S(-24.05)AGS(-36.09)APVLELPR	7	3	-0.28706
BGIOSGA001905-PA	96.73	871	BGIOSGA001905-PA	136	pep chromosome:ASM465v1:1:10553183:10558687:-1 gene:BGIOSGA001905 transcript:BGIOSGA001905-TA gene-biotype:protein-coding transcript-biotype:protein-coding	BGIOSGA001905-PA	136	136	S	VLEDFNTGKSSANGGSPGNDSPGNDRKRVRR	183.53	183.53	SSANGGS(1)PGNDS(1)PGNDR	S(-82.86)S(-81.46)ANGGS(81.46)PGNDS(137.92)PGNDR	7	2	-0.17073	14754000	21487000	30630000		12011000
BGIOSGA001922-PA	52.864	485	BGIOSGA001922-PA	477	pep chromosome:ASM465v1:1:10193599:10197123:-1 gene:BGIOSGA001922 transcript:BGIOSGA001922-TA gene-biotype:protein-coding transcript-biotype:protein-coding	BGIOSGA001922-PA	477	477	S	PNEEFLPRNSAPKYASDNDSDSAE-------	88.155	88.155	YAS(0.999)DNDS(0.001)DSAE	Y(-56.73)AS(32.35)DNDS(-32.35)DS(-68.5)AE	3	2	0.028393							21719000	17213000	8862100
BGIOSGA001922-PA	52.864	485	BGIOSGA001922-PA	483	pep chromosome:ASM465v1:1:10193599:10197123:-1 gene:BGIOSGA001922 transcript:BGIOSGA001922-TA gene-biotype:protein-coding transcript-biotype:protein-coding	BGIOSGA001922-PA	483	483	S	PRNSAPKYASDNDSDSAE-------------	48.284	48.284	YAS(0.139)DNDS(0.36)DS(0.501)AE	Y(-33.13)AS(-5.57)DNDS(-1.44)DS(1.44)AE	9	2	-0.3492							4093700	11559000	1465000
BGIOSGA001935-PA	35.664	324	BGIOSGA001935-PA	50	pep chromosome:ASM465v1:1:9932633:9936155:-1 gene:BGIOSGA001935 transcript:BGIOSGA001935-TA gene-biotype:protein-coding transcript-biotype:protein-coding	BGIOSGA001935-PA	50	50	S	AAPQSHSHPAKTLRASPPPPSTAGSAPKRSR	99.021	58.268	AS(1)PPPPSTAGSAPK	AS(45.35)PPPPS(-45.74)T(-45.74)AGS(-45.35)APK	2	2	-0.096758	20530000	6170200	26758000	5476600		8251800	8764500		3513000
BGIOSGA001936-PA	49.279	490	BGIOSGA001936-PA	11	pep chromosome:ASM465v1:1:9930011:9931483:-1 gene:BGIOSGA001936 transcript:BGIOSGA001936-TA gene-biotype:protein-coding transcript-biotype:protein-coding	BGIOSGA001936-PA	11	11	S	-----MGKKRKLDSKSPAAARSAAARAAAAA	78.964	78.964	LDS(0.018)KS(0.982)PAAAR	LDS(-17.48)KS(17.48)PAAAR	5	2	0.70676				8524300
BGIOSGA001938-PA	6.0752	59	BGIOSGA001938-PA	40	pep chromosome:ASM465v1:1:9898012:9898425:-1 gene:BGIOSGA001938 transcript:BGIOSGA001938-TA gene-biotype:protein-coding transcript-biotype:protein-coding	BGIOSGA001938-PA	40	40	S	ITAPLDRVKLLMQTHSVRVVGESTKKGIGFL	126.03	126.03	LLMQT(0.002)HS(0.998)VR	LLMQT(-26.24)HS(26.24)VR	7	2	-0.14812	18141000	10445000		24233000	11143000	1811800	47239000	18027000	17194000	19395000	5730600	10102000
BGIOSGA001951-PA	54.757	489	BGIOSGA001951-PA	425	pep chromosome:ASM465v1:1:9646746:9649897:-1 gene:BGIOSGA001951 transcript:BGIOSGA001951-TA gene-biotype:protein-coding transcript-biotype:protein-coding	BGIOSGA001951-PA	425	425	S	EHQKNQAHYVASTKRSDAGKPSTELSSNRGF	42.395	42.395	RS(0.932)DAGKPS(0.055)T(0.013)ELSSNR	RS(12.3)DAGKPS(-12.3)T(-18.67)ELS(-33.4)S(-34.08)NR	2	3	-0.54311										9831300
BGIOSGA001956-PA	149.67	1346	BGIOSGA001956-PA	672	pep chromosome:ASM465v1:1:9534585:9541834:-1 gene:BGIOSGA001956 transcript:BGIOSGA001956-TA gene-biotype:protein-coding transcript-biotype:protein-coding	BGIOSGA001956-PA	672	672	S	STQSDQDIKEINAQESPLKDNRATASWQVPS	56.286	56.286	EINAQES(1)PLKDNR	EINAQES(56.29)PLKDNR	7	2	3.1312										8098400	2450100
BGIOSGA001959-PA	34.385	324	BGIOSGA001959-PA	317	pep chromosome:ASM465v1:1:9498901:9501461:-1 gene:BGIOSGA001959 transcript:BGIOSGA001959-TA gene-biotype:protein-coding transcript-biotype:protein-coding	BGIOSGA001959-PA	317	317	S	ADTMMRAQTNTTSGGSSSPGGGR--------	162.49	98.408	AQTNTT(0.01)S(0.038)GGS(0.957)S(0.702)S(0.293)PGGGR	AQT(-69.94)NT(-39.43)T(-19.46)S(-14.66)GGS(14.66)S(3.8)S(-3.8)PGGGR	10	2	-1.6271	16957000	21037000	16186000	45136000	58169000	67202000	14126000	17396000	4327800	15331000	1446500
BGIOSGA001959-PA	34.385	324	BGIOSGA001959-PA	282	pep chromosome:ASM465v1:1:9498901:9501461:-1 gene:BGIOSGA001959 transcript:BGIOSGA001959-TA gene-biotype:protein-coding transcript-biotype:protein-coding	BGIOSGA001959-PA	282	282	T	RPEYISTKDQSVNQVTSPVAASEPVGSILPK	107.33	93.495	DQS(0.001)VNQVT(0.719)S(0.278)PVAAS(0.002)EPVGSILPK	DQS(-30.85)VNQVT(4.12)S(-4.12)PVAAS(-25.2)EPVGS(-36.7)ILPK	8	2	1.0163
BGIOSGA001959-PA	34.385	324	BGIOSGA001959-PA	318	pep chromosome:ASM465v1:1:9498901:9501461:-1 gene:BGIOSGA001959 transcript:BGIOSGA001959-TA gene-biotype:protein-coding transcript-biotype:protein-coding	BGIOSGA001959-PA	318	318	S	DTMMRAQTNTTSGGSSSPGGGR---------	162.82	98.408	AQTNTT(0.01)S(0.038)GGS(0.957)S(0.702)S(0.293)PGGGR	AQT(-69.94)NT(-39.43)T(-19.46)S(-14.66)GGS(14.66)S(3.8)S(-3.8)PGGGR	11	2	-1.6271			16186000	45136000
BGIOSGA001959-PA	34.385	324	BGIOSGA001959-PA	288	pep chromosome:ASM465v1:1:9498901:9501461:-1 gene:BGIOSGA001959 transcript:BGIOSGA001959-TA gene-biotype:protein-coding transcript-biotype:protein-coding	BGIOSGA001959-PA	288	288	S	TKDQSVNQVTSPVAASEPVGSILPKGVFPAD	54.869	54.869	DQS(0.002)VNQVT(0.318)S(0.228)PVAAS(0.449)EPVGS(0.003)ILPK	DQS(-24.28)VNQVT(-1.49)S(-2.93)PVAAS(1.49)EPVGS(-21.91)ILPK	14	3	0.56756
BGIOSGA001959-PA	34.385	324	BGIOSGA001959-PA	313	pep chromosome:ASM465v1:1:9498901:9501461:-1 gene:BGIOSGA001959 transcript:BGIOSGA001959-TA gene-biotype:protein-coding transcript-biotype:protein-coding	BGIOSGA001959-PA	313	313	T	GVFPADTMMRAQTNTTSGGSSSPGGGR----	294.52	157.91	AQTNT(0.016)T(0.948)S(0.001)GGS(0.001)S(0.03)S(0.005)PGGGR	AQT(-54.62)NT(-17.65)T(15.05)S(-32.01)GGS(-30.51)S(-15.05)S(-22.87)PGGGR	6	2	-1.4616						1276300000
BGIOSGA001959-PA	34.385	324	BGIOSGA001959-PA	283	pep chromosome:ASM465v1:1:9498901:9501461:-1 gene:BGIOSGA001959 transcript:BGIOSGA001959-TA gene-biotype:protein-coding transcript-biotype:protein-coding	BGIOSGA001959-PA	283	283	S	PEYISTKDQSVNQVTSPVAASEPVGSILPKG	217.86	217.86	DQSVNQVTS(1)PVAASEPVGSILPK	DQS(-122.8)VNQVT(-38.67)S(38.67)PVAAS(-46.39)EPVGS(-74.82)ILPK	9	2	0.90838	210670000	163320000	89850000	162490000	105130000	201450000			107800000	91640000	67394000	38051000
BGIOSGA001959-PA	34.385	324	BGIOSGA001959-PA	319	pep chromosome:ASM465v1:1:9498901:9501461:-1 gene:BGIOSGA001959 transcript:BGIOSGA001959-TA gene-biotype:protein-coding transcript-biotype:protein-coding	BGIOSGA001959-PA	319	319	S	TMMRAQTNTTSGGSSSPGGGR----------	338.42	241.11	AQTNTT(0.007)SGGSS(0.079)S(0.914)PGGGR	AQT(-120.52)NT(-55.81)T(-21.25)S(-49.7)GGS(-44.45)S(-10.63)S(10.63)PGGGR	12	2	0.45268	809490000	691540000	876390000	810510000	751640000		369190000	338790000	412070000	608820000	329440000	335350000
BGIOSGA001973-PA	30.418	280	BGIOSGA001973-PA	171	pep chromosome:ASM465v1:1:9313888:9317290:-1 gene:BGIOSGA001973 transcript:BGIOSGA001973-TA gene-biotype:protein-coding transcript-biotype:protein-coding	BGIOSGA001973-PA	171	171	S	NGADKLAEQRTALLESRRQELVFLDNEIVFN	68.557	68.557	TALLES(1)R	T(-64.7)ALLES(64.7)R	6	2	0.62686				2870400
BGIOSGA001977-PA	124.01	1118	BGIOSGA001977-PA	1104	pep chromosome:ASM465v1:1:9258123:9266675:-1 gene:BGIOSGA001977 transcript:BGIOSGA001977-TA gene-biotype:protein-coding transcript-biotype:protein-coding	BGIOSGA001977-PA	1104	1104	T	TTPPTENGVPNGRTSTSSATSNPAADQIQR-	170.42	133.16	T(0.037)S(0.045)T(0.859)S(0.044)S(0.014)AT(0.003)S(0.997)NPAADQIQR	T(-13.76)S(-12.87)T(12.87)S(-12.87)S(-17.85)AT(-29.55)S(29.55)NPAADQIQR	3	2	-0.52745	47051000	39857000		50224000	40876000	49804000			3315200		2379900
BGIOSGA001977-PA	124.01	1118	BGIOSGA001977-PA	1103	pep chromosome:ASM465v1:1:9258123:9266675:-1 gene:BGIOSGA001977 transcript:BGIOSGA001977-TA gene-biotype:protein-coding transcript-biotype:protein-coding	BGIOSGA001977-PA	1103	1103	S	GTTPPTENGVPNGRTSTSSATSNPAADQIQR	142.1	60.301	T(0.391)S(0.391)T(0.392)S(0.393)S(0.397)AT(0.03)S(0.006)NPAADQIQR	T(0)S(0)T(0)S(0)S(0)AT(-10.26)S(-17.48)NPAADQIQR	2	2	-0.18083
BGIOSGA001977-PA	124.01	1118	BGIOSGA001977-PA	682	pep chromosome:ASM465v1:1:9258123:9266675:-1 gene:BGIOSGA001977 transcript:BGIOSGA001977-TA gene-biotype:protein-coding transcript-biotype:protein-coding	BGIOSGA001977-PA	682	682	S	ASSMKVSGAPVVAGISPNIGRMDHIDRNSPA	67.416	67.416	VSGAPVVAGIS(1)PNIGR	VS(-56.93)GAPVVAGIS(56.93)PNIGR	11	2	-0.97674
BGIOSGA001977-PA	124.01	1118	BGIOSGA001977-PA	695	pep chromosome:ASM465v1:1:9258123:9266675:-1 gene:BGIOSGA001977 transcript:BGIOSGA001977-TA gene-biotype:protein-coding transcript-biotype:protein-coding	BGIOSGA001977-PA	695	695	S	GISPNIGRMDHIDRNSPAKPSPIMNGGDPAS	169.68	169.68	MDHIDRNS(1)PAKPSPIMNGGDPASR	MDHIDRNS(63.3)PAKPS(-63.3)PIMNGGDPAS(-125.83)R	8	3	-0.56612		28812000	31962000		15752000	14543000		6774800	7653300	8548800
BGIOSGA001977-PA	124.01	1118	BGIOSGA001977-PA	1102	pep chromosome:ASM465v1:1:9258123:9266675:-1 gene:BGIOSGA001977 transcript:BGIOSGA001977-TA gene-biotype:protein-coding transcript-biotype:protein-coding	BGIOSGA001977-PA	1102	1102	T	WGTTPPTENGVPNGRTSTSSATSNPAADQIQ	142.1	60.301	T(0.391)S(0.391)T(0.392)S(0.393)S(0.397)AT(0.03)S(0.006)NPAADQIQR	T(0)S(0)T(0)S(0)S(0)AT(-10.26)S(-17.48)NPAADQIQR	1	2	-0.18083
BGIOSGA001977-PA	124.01	1118	BGIOSGA001977-PA	1109	pep chromosome:ASM465v1:1:9258123:9266675:-1 gene:BGIOSGA001977 transcript:BGIOSGA001977-TA gene-biotype:protein-coding transcript-biotype:protein-coding	BGIOSGA001977-PA	1109	1109	S	ENGVPNGRTSTSSATSNPAADQIQR------	149.97	133.16	T(0.037)S(0.045)T(0.859)S(0.044)S(0.014)AT(0.003)S(0.997)NPAADQIQR	T(-13.76)S(-12.87)T(12.87)S(-12.87)S(-17.85)AT(-29.55)S(29.55)NPAADQIQR	8	2	-0.52745	47051000	39857000	57045000	11888000	25684000	33112000	53337000		11586000	15313000	12398000
BGIOSGA001977-PA	124.01	1118	BGIOSGA001977-PA	720	pep chromosome:ASM465v1:1:9258123:9266675:-1 gene:BGIOSGA001977 transcript:BGIOSGA001977-TA gene-biotype:protein-coding transcript-biotype:protein-coding	BGIOSGA001977-PA	720	720	S	GGDPASRSIDVKPRISEERPDKAKPWELMEV	80.706	73.885	IS(1)EERPDK	IS(73.89)EERPDK	2	2	-0.07709	98336000	132660000	178860000	274250000	223340000	243660000	200800000	183670000	170090000	158080000	111920000	162920000
BGIOSGA001977-PA	124.01	1118	BGIOSGA001977-PA	1108	pep chromosome:ASM465v1:1:9258123:9266675:-1 gene:BGIOSGA001977 transcript:BGIOSGA001977-TA gene-biotype:protein-coding transcript-biotype:protein-coding	BGIOSGA001977-PA	1108	1108	T	TENGVPNGRTSTSSATSNPAADQIQR-----	182.35	131.24	TSTSS(0.011)AT(0.939)S(0.05)NPAADQIQR	T(-43.67)S(-43.67)T(-33.82)S(-32.8)S(-19.5)AT(12.77)S(-12.77)NPAADQIQR	7	2	0.46533	53529000	46007000	48493000	92120000	35523000	43783000		15766000	13020000	5015800	13525000
BGIOSGA001977-PA	124.01	1118	BGIOSGA001977-PA	213	pep chromosome:ASM465v1:1:9258123:9266675:-1 gene:BGIOSGA001977 transcript:BGIOSGA001977-TA gene-biotype:protein-coding transcript-biotype:protein-coding	BGIOSGA001977-PA	213	213	S	LFTDHTCTPPNGARASPVSVPLSAVPKAGGT	97.297	77.192	AS(0.998)PVS(0.002)VPLSAVPK	AS(27.42)PVS(-27.42)VPLS(-57.99)AVPK	2	2	0.0033241	50571000	53769000	53278000	91362000	43261000	61123000					5774000
BGIOSGA001977-PA	124.01	1118	BGIOSGA001977-PA	1106	pep chromosome:ASM465v1:1:9258123:9266675:-1 gene:BGIOSGA001977 transcript:BGIOSGA001977-TA gene-biotype:protein-coding transcript-biotype:protein-coding	BGIOSGA001977-PA	1106	1106	S	PPTENGVPNGRTSTSSATSNPAADQIQR---	120.3	120.3	TSTS(0.088)S(0.789)AT(0.11)S(0.012)NPAADQIQR	T(-41.28)S(-41.28)T(-36.99)S(-9.53)S(8.56)AT(-8.56)S(-18.03)NPAADQIQR	5	2	0.23046
BGIOSGA001977-PA	124.01	1118	BGIOSGA001977-PA	1105	pep chromosome:ASM465v1:1:9258123:9266675:-1 gene:BGIOSGA001977 transcript:BGIOSGA001977-TA gene-biotype:protein-coding transcript-biotype:protein-coding	BGIOSGA001977-PA	1105	1105	S	TPPTENGVPNGRTSTSSATSNPAADQIQR--	170.42	170.11	T(0.001)S(0.001)T(0.13)S(0.848)S(0.02)ATSNPAADQIQR	T(-30.53)S(-30.53)T(-8.13)S(8.13)S(-16.17)AT(-66.21)S(-81.55)NPAADQIQR	4	2	0.33725	35152000		26716000		21203000		6836600	9183700		17644000
BGIOSGA001982-PA	173.55	1587	BGIOSGA001982-PA;BGIOSGA004527-PA	1224;532	pep chromosome:ASM465v1:1:9194966:9205778:-1 gene:BGIOSGA001982 transcript:BGIOSGA001982-TA gene-biotype:protein-coding transcript-biotype:protein-coding;pep chromosome:ASM465v1:1:35770237:35772928:1 gene:BGIOSGA004527 transcript:BGIOSGA004527-TA gene-biot	BGIOSGA001982-PA;BGIOSGA004527-PA	1224;532	1224	S	GSYASSLPSNLCRHFSFAEIKAATNNFDESL;SGHITANIAGMCRHFSFAEIKAATKNFSNDL	108.47	108.47	HFS(1)FAEIK	HFS(108.47)FAEIK	3	2	-2.7829				20171000	18623000	7323000				60512000		56769000
BGIOSGA001982-PA	173.55	1587	BGIOSGA001982-PA	352	pep chromosome:ASM465v1:1:9194966:9205778:-1 gene:BGIOSGA001982 transcript:BGIOSGA001982-TA gene-biotype:protein-coding transcript-biotype:protein-coding	BGIOSGA001982-PA	352	352	T	PDAVSAVDSLPRPTSTRFLAYDELKEATNNF	66.045	66.045	TPDAVS(0.004)AVDS(0.282)LPRPT(0.216)S(0.216)T(0.282)R	T(-59.67)PDAVS(-18.55)AVDS(0)LPRPT(-1.17)S(-1.17)T(0)R	17	3	-0.29617
BGIOSGA001982-PA	173.55	1587	BGIOSGA001982-PA	350	pep chromosome:ASM465v1:1:9194966:9205778:-1 gene:BGIOSGA001982 transcript:BGIOSGA001982-TA gene-biotype:protein-coding transcript-biotype:protein-coding	BGIOSGA001982-PA	350	350	T	RTPDAVSAVDSLPRPTSTRFLAYDELKEATN	158.02	77.969	TPDAVSAVDS(0.008)LPRPT(0.474)S(0.474)T(0.044)R	T(-70.24)PDAVS(-38.31)AVDS(-17.91)LPRPT(0)S(0)T(-10.33)R	15	2	-0.2318
BGIOSGA001982-PA	173.55	1587	BGIOSGA001982-PA	351	pep chromosome:ASM465v1:1:9194966:9205778:-1 gene:BGIOSGA001982 transcript:BGIOSGA001982-TA gene-biotype:protein-coding transcript-biotype:protein-coding	BGIOSGA001982-PA	351	351	S	TPDAVSAVDSLPRPTSTRFLAYDELKEATNN	158.02	77.969	TPDAVSAVDS(0.008)LPRPT(0.474)S(0.474)T(0.044)R	T(-70.24)PDAVS(-38.31)AVDS(-17.91)LPRPT(0)S(0)T(-10.33)R	16	2	-0.2318
BGIOSGA001982-PA	173.55	1587	BGIOSGA001982-PA	345	pep chromosome:ASM465v1:1:9194966:9205778:-1 gene:BGIOSGA001982 transcript:BGIOSGA001982-TA gene-biotype:protein-coding transcript-biotype:protein-coding	BGIOSGA001982-PA	345	345	S	ETPKQRTPDAVSAVDSLPRPTSTRFLAYDEL	137.12	129.77	TPDAVSAVDS(0.996)LPRPT(0.002)S(0.001)T(0.001)R	T(-111.7)PDAVS(-33.22)AVDS(26.37)LPRPT(-26.37)S(-32.28)T(-32.28)R	10	3	0.38294	19727000	31491000		21350000				6037300	5714700	32122000	12747000
BGIOSGA001983-PA	12.091	106	BGIOSGA001983-PA	49	pep chromosome:ASM465v1:1:9191354:9191780:-1 gene:BGIOSGA001983 transcript:BGIOSGA001983-TA gene-biotype:protein-coding transcript-biotype:protein-coding	BGIOSGA001983-PA	49	49	S	MPRVNDEKRPLEREKSDEEDGPPDPNAVPTD	167.16	135.07	EKS(1)DEEDGPPDPNAVPTDFTSR	EKS(128.27)DEEDGPPDPNAVPT(-128.27)DFT(-134.56)S(-134.52)R	3	3	-0.0052805	99963000	118460000	130160000	69563000	74432000	70283000	39033000	20298000	32726000	67574000	45556000	47470000
BGIOSGA001983-PA	12.091	106	BGIOSGA001983-PA	6	pep chromosome:ASM465v1:1:9191354:9191780:-1 gene:BGIOSGA001983 transcript:BGIOSGA001983-TA gene-biotype:protein-coding transcript-biotype:protein-coding	BGIOSGA001983-PA	6	6	S	----------MAREPSPEIDDELFNEVYGKA	98.902	98.902	EPS(1)PEIDDELFNEVYGK	EPS(93.28)PEIDDELFNEVY(-93.28)GK	3	2	-0.53455
BGIOSGA002022-PA	55.378	502	BGIOSGA002022-PA	236	pep chromosome:ASM465v1:1:8551755:8556667:-1 gene:BGIOSGA002022 transcript:BGIOSGA002022-TA gene-biotype:protein-coding transcript-biotype:protein-coding	BGIOSGA002022-PA	236	236	S	DNAAPKHVEDQTIDASPGKSSSESYKYEDTR	105.78	105.78	HVEDQTIDAS(1)PGK	HVEDQT(-35.34)IDAS(35.34)PGK	10	2	0.2088							1299600			10297000	4311300
BGIOSGA002027-PA	75.356	674	BGIOSGA002027-PA	520	pep chromosome:ASM465v1:1:8513802:8519112:-1 gene:BGIOSGA002027 transcript:BGIOSGA002027-TA gene-biotype:protein-coding transcript-biotype:protein-coding	BGIOSGA002027-PA	520	520	S	GGFFGSFFRKSLKKGSFHDIDPGIPTTPGPQ	43.312	43.312	KGS(0.997)FHDIDPGIPT(0.002)T(0.001)PGPQSATELDPK	KGS(26.91)FHDIDPGIPT(-26.91)T(-32.8)PGPQS(-37.35)AT(-37.22)ELDPK	3	3	0.90704	20271000	29655000
BGIOSGA002054-PA	186.98	1692	BGIOSGA002054-PA	1624	pep chromosome:ASM465v1:1:8110659:8120086:-1 gene:BGIOSGA002054 transcript:BGIOSGA002054-TA gene-biotype:protein-coding transcript-biotype:protein-coding	BGIOSGA002054-PA	1624	1624	S	ELKTTKVMEEMVSDSSPTQTKVKRVADTLGE	149.59	63.947	VMEEMVS(0.04)DS(0.215)S(0.534)PT(0.124)QT(0.087)K	VMEEMVS(-11.25)DS(-3.95)S(3.95)PT(-6.33)QT(-7.87)K	10	2	-0.77203					15437000	13273000				13127000		18484000
BGIOSGA002054-PA	186.98	1692	BGIOSGA002054-PA	1623	pep chromosome:ASM465v1:1:8110659:8120086:-1 gene:BGIOSGA002054 transcript:BGIOSGA002054-TA gene-biotype:protein-coding transcript-biotype:protein-coding	BGIOSGA002054-PA	1623	1623	S	GELKTTKVMEEMVSDSSPTQTKVKRVADTLG	66.331	66.331	VMEEMVS(0.106)DS(0.329)S(0.329)PT(0.123)QT(0.112)K	VMEEMVS(-4.92)DS(0)S(0)PT(-4.29)QT(-4.67)K	9	2	0.52589
BGIOSGA002059-PA	63.12	567	BGIOSGA002059-PA	384	pep chromosome:ASM465v1:1:8083342:8085556:-1 gene:BGIOSGA002059 transcript:BGIOSGA002059-TA gene-biotype:protein-coding transcript-biotype:protein-coding	BGIOSGA002059-PA	384	384	S	EPKIGSLQMFVKNSGSCEEFGPRAFPVQEVH	54.7	54.7	NS(0.022)GS(0.978)CEEFGPR	NS(-16.4)GS(16.4)CEEFGPR	4	2	-0.66842											3288700	3266900
BGIOSGA002063-PA	55.288	496	BGIOSGA002063-PA	193	pep chromosome:ASM465v1:1:8038167:8045602:-1 gene:BGIOSGA002063 transcript:BGIOSGA002063-TA gene-biotype:protein-coding transcript-biotype:protein-coding	BGIOSGA002063-PA	193	193	S	VLLVQKHEPECSSVVSSMTRTEYGSESDGYN	78.486	78.486	HEPECS(0.002)S(0.002)VVS(0.46)S(0.46)MT(0.075)R	HEPECS(-23.96)S(-23.96)VVS(0)S(0)MT(-7.86)R	10	2	-0.59081
BGIOSGA002063-PA	55.288	496	BGIOSGA002063-PA	483	pep chromosome:ASM465v1:1:8038167:8045602:-1 gene:BGIOSGA002063 transcript:BGIOSGA002063-TA gene-biotype:protein-coding transcript-biotype:protein-coding	BGIOSGA002063-PA	483	483	S	DLAANRTHFLKLTRDSPAAADEIVECTSS--	120.11	120.11	LT(0.192)RDS(0.808)PAAADEIVECTSS	LT(-6.25)RDS(6.25)PAAADEIVECT(-108.69)S(-111.93)S(-111.62)	5	2	1.1599	74272000	73104000
BGIOSGA002063-PA	55.288	496	BGIOSGA002063-PA	194	pep chromosome:ASM465v1:1:8038167:8045602:-1 gene:BGIOSGA002063 transcript:BGIOSGA002063-TA gene-biotype:protein-coding transcript-biotype:protein-coding	BGIOSGA002063-PA	194	194	S	LLVQKHEPECSSVVSSMTRTEYGSESDGYNL	78.486	78.486	HEPECS(0.002)S(0.002)VVS(0.46)S(0.46)MT(0.075)R	HEPECS(-23.96)S(-23.96)VVS(0)S(0)MT(-7.86)R	11	2	-0.59081
BGIOSGA002063-PA	55.288	496	BGIOSGA002063-PA	297	pep chromosome:ASM465v1:1:8038167:8045602:-1 gene:BGIOSGA002063 transcript:BGIOSGA002063-TA gene-biotype:protein-coding transcript-biotype:protein-coding	BGIOSGA002063-PA	297	297	S	GLFFFDVRFPSEYPQSPPKVHYHSGGLRLNP	151.7	151.7	FPSEYPQS(1)PPK	FPS(-92.43)EY(-86.48)PQS(86.48)PPK	8	2	-1.1273	7360700	12469000		7989200	8269300	8186800			2557400	19845000	13174000	19897000
BGIOSGA002063-PA	55.288	496	BGIOSGA002063-PA	407	pep chromosome:ASM465v1:1:8038167:8045602:-1 gene:BGIOSGA002063 transcript:BGIOSGA002063-TA gene-biotype:protein-coding transcript-biotype:protein-coding	BGIOSGA002063-PA	407	407	S	RTMMYSLRKPPKHFESLVARHFHERERVILD	81.263	69.375	HFES(1)LVAR	HFES(69.37)LVAR	4	2	0.3024										11270000	6830400	13577000
BGIOSGA002063-PA	55.288	496	BGIOSGA002063-PA	196	pep chromosome:ASM465v1:1:8038167:8045602:-1 gene:BGIOSGA002063 transcript:BGIOSGA002063-TA gene-biotype:protein-coding transcript-biotype:protein-coding	BGIOSGA002063-PA	196	196	T	VQKHEPECSSVVSSMTRTEYGSESDGYNLFN	63.76	63.76	HEPECS(0.009)S(0.009)VVS(0.282)S(0.282)MT(0.418)R	HEPECS(-16.57)S(-16.57)VVS(-1.72)S(-1.72)MT(1.72)R	13	2	-0.58348
BGIOSGA002073-PA	11.876	119	BGIOSGA002073-PA	109	pep chromosome:ASM465v1:1:7815819:7816971:-1 gene:BGIOSGA002073 transcript:BGIOSGA002073-TA gene-biotype:protein-coding transcript-biotype:protein-coding	BGIOSGA002073-PA	109	109	S	EAPKAEEKKEEEKEESEDDLGFSLFD-----	237.73	148.15	KEEEKEES(1)EDDLGFSLFD	KEEEKEES(87.94)EDDLGFS(-87.94)LFD	8	2	0.29126	209070000	394410000	226900000	627820000	140400000	377210000	150870000	157100000	282110000	137410000	166050000	144060000
BGIOSGA002073-PA	11.876	119	BGIOSGA002073-PA	30	pep chromosome:ASM465v1:1:7815819:7816971:-1 gene:BGIOSGA002073 transcript:BGIOSGA002073-TA gene-biotype:protein-coding transcript-biotype:protein-coding	BGIOSGA002073-PA	30	30	T	WTAKQLKGELEASAATPYELQRRLVAAASAA	101.04	82.349	GELEAS(0.002)AAT(0.951)PY(0.048)ELQR	GELEAS(-27.54)AAT(13.01)PY(-13.01)ELQR	9	2	-0.41258		6991700					4368800			11610000		18018000
BGIOSGA002079-PA	61.062	528	BGIOSGA002079-PA	166	pep chromosome:ASM465v1:1:7638210:7641403:-1 gene:BGIOSGA002079 transcript:BGIOSGA002079-TA gene-biotype:protein-coding transcript-biotype:protein-coding description:Eukaryotic translation initiation factor 3 subunit L [Source:UniProtKB/TrEMBL;Acc:B8AB04]	BGIOSGA002079-PA	166	166	S	QFQSFCQYRAKLKNKSDDELHQLKQFDKLQP	86.288	86.288	NKS(1)DDELHQLK	NKS(86.29)DDELHQLK	3	2	-0.045919					10230000
BGIOSGA002082-PA	34.956	325	BGIOSGA002082-PA;BGIOSGA002088-PA	67;68	pep chromosome:ASM465v1:1:7610742:7612195:-1 gene:BGIOSGA002082 transcript:BGIOSGA002082-TA gene-biotype:protein-coding transcript-biotype:protein-coding;pep chromosome:ASM465v1:1:7566181:7567537:-1 gene:BGIOSGA002088 transcript:BGIOSGA002088-TA gene-bioty	BGIOSGA002082-PA	67	67	S	PVYNNSPLDSPSHHSSSFGRHSRVSSASRFS	50.322	50.322	DSHDDGDKS(0.061)PS(0.018)T(0.019)QAT(0.022)PVY(0.461)NNS(0.25)PLDS(0.134)PS(0.107)HHS(0.159)S(0.417)S(0.353)FGR	DS(-31.85)HDDGDKS(-10.63)PS(-14.94)T(-14.7)QAT(-13.97)PVY(2.75)NNS(-2.75)PLDS(-6.31)PS(-9.83)HHS(-4.86)S(0.63)S(-0.63)FGR	31	3	0.82011
BGIOSGA002082-PA	34.956	325	BGIOSGA002082-PA;BGIOSGA002088-PA	66;67	pep chromosome:ASM465v1:1:7610742:7612195:-1 gene:BGIOSGA002082 transcript:BGIOSGA002082-TA gene-biotype:protein-coding transcript-biotype:protein-coding;pep chromosome:ASM465v1:1:7566181:7567537:-1 gene:BGIOSGA002088 transcript:BGIOSGA002088-TA gene-bioty	BGIOSGA002082-PA	66	66	S	TPVYNNSPLDSPSHHSSSFGRHSRVSSASRF	87.676	87.676	DSHDDGDKSPSTQATPVY(0.001)NNS(0.016)PLDS(0.187)PS(0.124)HHS(0.255)S(0.209)S(0.209)FGR	DS(-79.07)HDDGDKS(-58.1)PS(-58.48)T(-58.48)QAT(-49.16)PVY(-25.01)NNS(-12.03)PLDS(-1.36)PS(-3.15)HHS(0.88)S(-0.88)S(-0.88)FGR	30	4	-0.91771
BGIOSGA002082-PA	34.956	325	BGIOSGA002082-PA;BGIOSGA002088-PA	61;62	pep chromosome:ASM465v1:1:7610742:7612195:-1 gene:BGIOSGA002082 transcript:BGIOSGA002082-TA gene-biotype:protein-coding transcript-biotype:protein-coding;pep chromosome:ASM465v1:1:7566181:7567537:-1 gene:BGIOSGA002088 transcript:BGIOSGA002088-TA gene-bioty	BGIOSGA002082-PA	61	61	S	PSTQATPVYNNSPLDSPSHHSSSFGRHSRVS	54.913	54.913	DSHDDGDKSPSTQAT(0.001)PVY(0.025)NNS(0.051)PLDS(0.715)PS(0.165)HHS(0.013)S(0.015)S(0.016)FGR	DS(-49.17)HDDGDKS(-38.84)PS(-35.18)T(-35.18)QAT(-30.8)PVY(-14.51)NNS(-11.5)PLDS(6.37)PS(-6.37)HHS(-17.37)S(-16.93)S(-16.48)FGR	25	4	-0.47064							14512000					24762000
BGIOSGA002082-PA	34.956	325	BGIOSGA002082-PA;BGIOSGA002088-PA	19;19	pep chromosome:ASM465v1:1:7610742:7612195:-1 gene:BGIOSGA002082 transcript:BGIOSGA002082-TA gene-biotype:protein-coding transcript-biotype:protein-coding;pep chromosome:ASM465v1:1:7566181:7567537:-1 gene:BGIOSGA002088 transcript:BGIOSGA002088-TA gene-bioty	BGIOSGA002082-PA	19	19	S	ATSESDMTSLATSSPSRSPKAAAAYYVQISP	43.696	43.696	PAT(0.005)S(0.014)ES(0.017)DMT(0.036)S(0.05)LAT(0.055)S(0.415)S(0.455)PS(0.56)RS(0.392)PK	PAT(-21.77)S(-17.51)ES(-16.8)DMT(-13.27)S(-11.13)LAT(-10.43)S(-0.46)S(0.46)PS(1.79)RS(-1.79)PK	17	3	-1.0514
BGIOSGA002082-PA	34.956	325	BGIOSGA002082-PA;BGIOSGA002088-PA	17;17	pep chromosome:ASM465v1:1:7610742:7612195:-1 gene:BGIOSGA002082 transcript:BGIOSGA002082-TA gene-biotype:protein-coding transcript-biotype:protein-coding;pep chromosome:ASM465v1:1:7566181:7567537:-1 gene:BGIOSGA002088 transcript:BGIOSGA002088-TA gene-bioty	BGIOSGA002082-PA	17	17	S	KPATSESDMTSLATSSPSRSPKAAAAYYVQI	114.28	92.098	MKPATSESDMTSLAT(0.047)S(0.204)S(0.608)PS(0.141)R	MKPAT(-72.81)S(-62.82)ES(-50.75)DMT(-47.51)S(-34.62)LAT(-11.08)S(-4.75)S(4.75)PS(-6.36)R	17	2	0.30151		13160000				14624000
BGIOSGA002082-PA	34.956	325	BGIOSGA002082-PA;BGIOSGA002088-PA	68;69	pep chromosome:ASM465v1:1:7610742:7612195:-1 gene:BGIOSGA002082 transcript:BGIOSGA002082-TA gene-biotype:protein-coding transcript-biotype:protein-coding;pep chromosome:ASM465v1:1:7566181:7567537:-1 gene:BGIOSGA002088 transcript:BGIOSGA002088-TA gene-bioty	BGIOSGA002082-PA	68	68	S	VYNNSPLDSPSHHSSSFGRHSRVSSASRFSG	78.43	78.43	DSHDDGDKSPSTQATPVYNNSPLDS(0.009)PS(0.083)HHS(0.209)S(0.169)S(0.53)FGR	DS(-68.95)HDDGDKS(-38.32)PS(-38.45)T(-38.45)QAT(-38.81)PVY(-38.37)NNS(-31.97)PLDS(-17.68)PS(-8.07)HHS(-4.05)S(-4.97)S(4.05)FGR	32	3	0.32004					8420800		51525000	27741000		57717000
BGIOSGA002082-PA	34.956	325	BGIOSGA002082-PA;BGIOSGA002088-PA	16;16	pep chromosome:ASM465v1:1:7610742:7612195:-1 gene:BGIOSGA002082 transcript:BGIOSGA002082-TA gene-biotype:protein-coding transcript-biotype:protein-coding;pep chromosome:ASM465v1:1:7566181:7567537:-1 gene:BGIOSGA002088 transcript:BGIOSGA002088-TA gene-bioty	BGIOSGA002082-PA	16	16	S	MKPATSESDMTSLATSSPSRSPKAAAAYYVQ	214.24	214.24	PATSESDMTSLAT(0.186)S(0.53)S(0.219)PS(0.065)R	PAT(-163.93)S(-141.34)ES(-102.07)DMT(-54.89)S(-39.71)LAT(-4.54)S(3.85)S(-3.85)PS(-9.09)R	14	2	-1.1298				16463000
BGIOSGA002082-PA	34.956	325	BGIOSGA002082-PA;BGIOSGA002088-PA	48;49	pep chromosome:ASM465v1:1:7610742:7612195:-1 gene:BGIOSGA002082 transcript:BGIOSGA002082-TA gene-biotype:protein-coding transcript-biotype:protein-coding;pep chromosome:ASM465v1:1:7566181:7567537:-1 gene:BGIOSGA002088 transcript:BGIOSGA002088-TA gene-bioty	BGIOSGA002082-PA	48	48	T	SPSRDSHDDGDKSPSTQATPVYNNSPLDSPS	136.79	109.01	DSHDDGDKS(0.29)PS(0.354)T(0.354)QAT(0.001)PVYNNSPLDSPSHHSSSFGR	DS(-33.51)HDDGDKS(-0.87)PS(0)T(0)QAT(-27.45)PVY(-49.17)NNS(-61.53)PLDS(-78.33)PS(-83.15)HHS(-92.65)S(-92.35)S(-92.04)FGR	12	4	-0.49723
BGIOSGA002082-PA	34.956	325	BGIOSGA002082-PA;BGIOSGA002088-PA	51;52	pep chromosome:ASM465v1:1:7610742:7612195:-1 gene:BGIOSGA002082 transcript:BGIOSGA002082-TA gene-biotype:protein-coding transcript-biotype:protein-coding;pep chromosome:ASM465v1:1:7566181:7567537:-1 gene:BGIOSGA002088 transcript:BGIOSGA002088-TA gene-bioty	BGIOSGA002082-PA	51	51	T	RDSHDDGDKSPSTQATPVYNNSPLDSPSHHS	148.79	115.74	DSHDDGDKS(0.009)PS(0.043)T(0.043)QAT(0.751)PVY(0.109)NNS(0.014)PLDS(0.024)PS(0.004)HHSS(0.001)S(0.001)FGR	DS(-42.74)HDDGDKS(-19.42)PS(-12.39)T(-12.39)QAT(8.38)PVY(-8.38)NNS(-17.23)PLDS(-15.02)PS(-22.33)HHS(-34.35)S(-29.37)S(-29.37)FGR	15	4	-0.52956					9310800		154730000	88607000	65076000		77946000
BGIOSGA002082-PA	34.956	325	BGIOSGA002082-PA;BGIOSGA002088-PA	45;46	pep chromosome:ASM465v1:1:7610742:7612195:-1 gene:BGIOSGA002082 transcript:BGIOSGA002082-TA gene-biotype:protein-coding transcript-biotype:protein-coding;pep chromosome:ASM465v1:1:7566181:7567537:-1 gene:BGIOSGA002088 transcript:BGIOSGA002088-TA gene-bioty	BGIOSGA002082-PA	45	45	S	VQISPSRDSHDDGDKSPSTQATPVYNNSPLD	183.82	122.11	DSHDDGDKS(0.988)PS(0.005)T(0.005)QAT(0.001)PVYNNSPLDSPSHHSSSFGR	DS(-43.68)HDDGDKS(22.59)PS(-22.59)T(-22.59)QAT(-29.07)PVY(-50.21)NNS(-56.54)PLDS(-74)PS(-79.21)HHS(-91.82)S(-95.83)S(-99.61)FGR	9	3	0.22948			14862000		38551000	37170000
BGIOSGA002082-PA	34.956	325	BGIOSGA002082-PA;BGIOSGA002088-PA	47;48	pep chromosome:ASM465v1:1:7610742:7612195:-1 gene:BGIOSGA002082 transcript:BGIOSGA002082-TA gene-biotype:protein-coding transcript-biotype:protein-coding;pep chromosome:ASM465v1:1:7566181:7567537:-1 gene:BGIOSGA002088 transcript:BGIOSGA002088-TA gene-bioty	BGIOSGA002082-PA	47	47	S	ISPSRDSHDDGDKSPSTQATPVYNNSPLDSP	136.79	109.01	DSHDDGDKS(0.29)PS(0.354)T(0.354)QAT(0.001)PVYNNSPLDSPSHHSSSFGR	DS(-33.51)HDDGDKS(-0.87)PS(0)T(0)QAT(-27.45)PVY(-49.17)NNS(-61.53)PLDS(-78.33)PS(-83.15)HHS(-92.65)S(-92.35)S(-92.04)FGR	11	4	-0.49723
BGIOSGA002082-PA	34.956	325	BGIOSGA002082-PA;BGIOSGA002088-PA	33;34	pep chromosome:ASM465v1:1:7610742:7612195:-1 gene:BGIOSGA002082 transcript:BGIOSGA002082-TA gene-biotype:protein-coding transcript-biotype:protein-coding;pep chromosome:ASM465v1:1:7566181:7567537:-1 gene:BGIOSGA002088 transcript:BGIOSGA002088-TA gene-bioty	BGIOSGA002082-PA	33	33	S	PSRSPKAAAAYYVQISPSRDSHDDGDKSPST	142.85	66.215	AAAAYY(0.001)VQIS(0.939)PS(0.06)R	AAAAY(-40.17)Y(-29.63)VQIS(11.94)PS(-11.94)R	10	2	2.1529	3951300	3207400		10375000	16172000	12884000	10953000	11038000		9831000	4134800	10475000
BGIOSGA002082-PA	34.956	325	BGIOSGA002082-PA	21	pep chromosome:ASM465v1:1:7610742:7612195:-1 gene:BGIOSGA002082 transcript:BGIOSGA002082-TA gene-biotype:protein-coding transcript-biotype:protein-coding	BGIOSGA002082-PA	21	21	S	SESDMTSLATSSPSRSPKAAAAYYVQISPSR	62.891	46.247	MKPAT(0.001)S(0.001)ES(0.002)DMT(0.004)S(0.004)LAT(0.336)S(0.303)S(0.336)PS(0.075)RS(0.939)PK	MKPAT(-24.61)S(-24.79)ES(-24.05)DMT(-20.19)S(-19.93)LAT(0)S(-0.46)S(0)PS(-12.26)RS(12.26)PK	21	3	-0.076537	30856000	30177000	15760000	19290000
BGIOSGA002082-PA	34.956	325	BGIOSGA002082-PA;BGIOSGA002088-PA	15;15	pep chromosome:ASM465v1:1:7610742:7612195:-1 gene:BGIOSGA002082 transcript:BGIOSGA002082-TA gene-biotype:protein-coding transcript-biotype:protein-coding;pep chromosome:ASM465v1:1:7566181:7567537:-1 gene:BGIOSGA002088 transcript:BGIOSGA002088-TA gene-bioty	BGIOSGA002082-PA	15	15	T	-MKPATSESDMTSLATSSPSRSPKAAAAYYV	114.28	62.891	PATSES(0.001)DMT(0.016)S(0.096)LAT(0.348)S(0.348)S(0.348)PS(0.12)RS(0.725)PK	PAT(-44.64)S(-39.29)ES(-29.7)DMT(-13.47)S(-5.09)LAT(0)S(0)S(0)PS(-7.58)RS(5.78)PK	13	2	0.88571
BGIOSGA002089-PA	93.564	841	BGIOSGA002089-PA	219	pep chromosome:ASM465v1:1:7425560:7430968:-1 gene:BGIOSGA002089 transcript:BGIOSGA002089-TA gene-biotype:protein-coding transcript-biotype:protein-coding	BGIOSGA002089-PA	219	219	S	STSSFPKLKRNASTSSDMSSLASQGPPNNPA	75.574	75.574	NAS(0.237)T(0.237)S(0.237)S(0.237)DMS(0.043)S(0.008)LASQGPPNNPASLR	NAS(0)T(0)S(0)S(0)DMS(-7.4)S(-14.66)LAS(-35.34)QGPPNNPAS(-69.54)LR	6	2	0.061386
BGIOSGA002089-PA	93.564	841	BGIOSGA002089-PA	241	pep chromosome:ASM465v1:1:7425560:7430968:-1 gene:BGIOSGA002089 transcript:BGIOSGA002089-TA gene-biotype:protein-coding transcript-biotype:protein-coding	BGIOSGA002089-PA	241	241	S	SQGPPNNPASLRRASSWTFDEKILVQAVYKV	72.922	72.922	AS(0.001)S(0.961)WT(0.038)FDEK	AS(-29.15)S(14.03)WT(-14.03)FDEK	3	2	0.49047					15601000	14134000
BGIOSGA002089-PA	93.564	841	BGIOSGA002089-PA	217	pep chromosome:ASM465v1:1:7425560:7430968:-1 gene:BGIOSGA002089 transcript:BGIOSGA002089-TA gene-biotype:protein-coding transcript-biotype:protein-coding	BGIOSGA002089-PA	217	217	T	SESTSSFPKLKRNASTSSDMSSLASQGPPNN	75.574	75.574	NAS(0.237)T(0.237)S(0.237)S(0.237)DMS(0.043)S(0.008)LASQGPPNNPASLR	NAS(0)T(0)S(0)S(0)DMS(-7.4)S(-14.66)LAS(-35.34)QGPPNNPAS(-69.54)LR	4	2	0.061386
BGIOSGA002089-PA	93.564	841	BGIOSGA002089-PA	218	pep chromosome:ASM465v1:1:7425560:7430968:-1 gene:BGIOSGA002089 transcript:BGIOSGA002089-TA gene-biotype:protein-coding transcript-biotype:protein-coding	BGIOSGA002089-PA	218	218	S	ESTSSFPKLKRNASTSSDMSSLASQGPPNNP	75.574	75.574	NAS(0.237)T(0.237)S(0.237)S(0.237)DMS(0.043)S(0.008)LASQGPPNNPASLR	NAS(0)T(0)S(0)S(0)DMS(-7.4)S(-14.66)LAS(-35.34)QGPPNNPAS(-69.54)LR	5	2	0.061386
BGIOSGA002089-PA	93.564	841	BGIOSGA002089-PA	161	pep chromosome:ASM465v1:1:7425560:7430968:-1 gene:BGIOSGA002089 transcript:BGIOSGA002089-TA gene-biotype:protein-coding transcript-biotype:protein-coding	BGIOSGA002089-PA	161	161	S	YGGGSSTDSSFKRSISETTLEKVSGLLGSLS	75.416	75.416	SIS(0.996)ET(0.003)T(0.001)LEK	S(-37.33)IS(24.81)ET(-24.81)T(-30.99)LEK	3	2	-0.22034	11318000	12241000	12938000				10061000
BGIOSGA002089-PA	93.564	841	BGIOSGA002089-PA	216	pep chromosome:ASM465v1:1:7425560:7430968:-1 gene:BGIOSGA002089 transcript:BGIOSGA002089-TA gene-biotype:protein-coding transcript-biotype:protein-coding	BGIOSGA002089-PA	216	216	S	SSESTSSFPKLKRNASTSSDMSSLASQGPPN	116.45	116.45	NAS(0.76)T(0.166)S(0.037)S(0.037)DMS(0.001)SLASQGPPNNPASLR	NAS(6.61)T(-6.61)S(-13.14)S(-13.14)DMS(-31.58)S(-40.3)LAS(-65.31)QGPPNNPAS(-111.4)LR	3	2	0.25645				11010000		13633000
BGIOSGA002094-PA	24.463	218	BGIOSGA002094-PA	67	pep chromosome:ASM465v1:1:7306113:7307755:-1 gene:BGIOSGA002094 transcript:BGIOSGA002094-TA gene-biotype:protein-coding transcript-biotype:protein-coding	BGIOSGA002094-PA	67	67	T	LSDMYRKPAAEKSDNTSDDDEEPDIDIGKLL	120.63	120.63	S(0.015)DNT(0.962)S(0.023)DDDEEPDIDIGK	S(-17.97)DNT(16.19)S(-16.19)DDDEEPDIDIGK	4	2	0.10033		24203000								15101000
BGIOSGA002094-PA	24.463	218	BGIOSGA002094-PA	64	pep chromosome:ASM465v1:1:7306113:7307755:-1 gene:BGIOSGA002094 transcript:BGIOSGA002094-TA gene-biotype:protein-coding transcript-biotype:protein-coding	BGIOSGA002094-PA	64	64	S	GSSLSDMYRKPAAEKSDNTSDDDEEPDIDIG	59.898	59.898	S(0.434)DNT(0.368)S(0.198)DDDEEPDIDIGK	S(0.71)DNT(-0.71)S(-3.42)DDDEEPDIDIGK	1	2	-0.8178
BGIOSGA002094-PA	24.463	218	BGIOSGA002094-PA	68	pep chromosome:ASM465v1:1:7306113:7307755:-1 gene:BGIOSGA002094 transcript:BGIOSGA002094-TA gene-biotype:protein-coding transcript-biotype:protein-coding	BGIOSGA002094-PA	68	68	S	SDMYRKPAAEKSDNTSDDDEEPDIDIGKLLK	152.32	109.84	S(0.002)DNT(0.125)S(0.873)DDDEEPDIDIGK	S(-26.23)DNT(-8.45)S(8.45)DDDEEPDIDIGK	5	2	0.97162	9121300		39251000			12429000
BGIOSGA002099-PA	68.306	641	BGIOSGA002099-PA	620	pep chromosome:ASM465v1:1:7228204:7231407:-1 gene:BGIOSGA002099 transcript:BGIOSGA002099-TA gene-biotype:protein-coding transcript-biotype:protein-coding	BGIOSGA002099-PA	620	620	S	RMLEDVRRTDTGTRTSTEASTPVVDVQNKAE	62.011	62.011	T(0.431)S(0.431)T(0.136)EAS(0.001)TPVVDVQNK	T(0)S(0)T(-5)EAS(-29.01)T(-34.1)PVVDVQNK	2	2	0.89983
BGIOSGA002099-PA	68.306	641	BGIOSGA002099-PA	619	pep chromosome:ASM465v1:1:7228204:7231407:-1 gene:BGIOSGA002099 transcript:BGIOSGA002099-TA gene-biotype:protein-coding transcript-biotype:protein-coding	BGIOSGA002099-PA	619	619	T	VRMLEDVRRTDTGTRTSTEASTPVVDVQNKA	62.011	62.011	T(0.431)S(0.431)T(0.136)EAS(0.001)TPVVDVQNK	T(0)S(0)T(-5)EAS(-29.01)T(-34.1)PVVDVQNK	1	2	0.89983
BGIOSGA002099-PA	68.306	641	BGIOSGA002099-PA	625	pep chromosome:ASM465v1:1:7228204:7231407:-1 gene:BGIOSGA002099 transcript:BGIOSGA002099-TA gene-biotype:protein-coding transcript-biotype:protein-coding	BGIOSGA002099-PA	625	625	T	VRRTDTGTRTSTEASTPVVDVQNKAESSSAA	101.61	101.61	TST(0.003)EAS(0.22)T(0.776)PVVDVQNK	T(-32.15)S(-32.15)T(-24.4)EAS(-5.47)T(5.47)PVVDVQNK	7	2	0.034807	4247400	3294800			10988000		9278000		4587700		5010400
BGIOSGA002099-PA	68.306	641	BGIOSGA002099-PA	432	pep chromosome:ASM465v1:1:7228204:7231407:-1 gene:BGIOSGA002099 transcript:BGIOSGA002099-TA gene-biotype:protein-coding transcript-biotype:protein-coding	BGIOSGA002099-PA	432	432	T	GSVSNMLHGKRGEDRTPLNWETRVRIALGAA	77.379	77.379	T(1)PLNWETR	T(73.02)PLNWET(-73.02)R	1	2	-0.083743
BGIOSGA002099-PA	68.306	641	BGIOSGA002099-PA	624	pep chromosome:ASM465v1:1:7228204:7231407:-1 gene:BGIOSGA002099 transcript:BGIOSGA002099-TA gene-biotype:protein-coding transcript-biotype:protein-coding	BGIOSGA002099-PA	624	624	S	DVRRTDTGTRTSTEASTPVVDVQNKAESSSA	72.817	72.817	T(0.002)S(0.002)T(0.003)EAS(0.497)T(0.497)PVVDVQNK	T(-25.04)S(-25.04)T(-22.18)EAS(0)T(0)PVVDVQNK	6	2	3.5885
BGIOSGA002099-PA	68.306	641	BGIOSGA002099-PA	499	pep chromosome:ASM465v1:1:7228204:7231407:-1 gene:BGIOSGA002099 transcript:BGIOSGA002099-TA gene-biotype:protein-coding transcript-biotype:protein-coding	BGIOSGA002099-PA	499	499	S	LGLASLMNPITARSRSLGYCAPEVTDSRKAS	57.414	57.414	S(0.999)LGY(0.001)CAPEVTDSR	S(32.72)LGY(-32.72)CAPEVT(-52.1)DS(-55.47)R	1	2	-0.51229										10509000		7291800
BGIOSGA002103-PA	116.46	1045	BGIOSGA002103-PA	454	pep chromosome:ASM465v1:1:7187173:7194128:-1 gene:BGIOSGA002103 transcript:BGIOSGA002103-TA gene-biotype:protein-coding transcript-biotype:protein-coding	BGIOSGA002103-PA	454	454	S	SVRPRRIRDLPSQPTSPERATSPAITSTSDQ	99.732	83.455	DLPSQPT(0.031)S(0.969)PER	DLPS(-40.98)QPT(-14.89)S(14.89)PER	8	2	-0.11191	23122000	22744000	29236000	31612000		32506000	1736800	4053800		21959000		19138000
BGIOSGA002148-PA	65.51	616	BGIOSGA002148-PA	6	pep chromosome:ASM465v1:1:6427432:6429378:-1 gene:BGIOSGA002148 transcript:BGIOSGA002148-TA gene-biotype:protein-coding transcript-biotype:protein-coding	BGIOSGA002148-PA	6	6	T	----------MAAVDTPEKPYEGKPAAEARS	131.06	131.06	AAVDT(1)PEKPYEGK	AAVDT(81.71)PEKPY(-81.71)EGK	5	2	-0.46219	38633000	30373000	36013000	5987000	21944000	27596000	18705000	10237000		14743000
BGIOSGA002150-PA	85.547	787	BGIOSGA002150-PA	542	pep chromosome:ASM465v1:1:6389528:6395907:-1 gene:BGIOSGA002150 transcript:BGIOSGA002150-TA gene-biotype:protein-coding transcript-biotype:protein-coding	BGIOSGA002150-PA	542	542	S	SQGEDHSLYKRDKSQSGDQLSSQHPGNVFSP	47.806	47.806	DKS(0.171)QS(0.81)GDQLS(0.009)S(0.01)QHPGNVFSPR	DKS(-6.76)QS(6.76)GDQLS(-19.71)S(-19.02)QHPGNVFS(-35.39)PR	5	3	-0.45522										15155000	8606100
BGIOSGA002150-PA	85.547	787	BGIOSGA002150-PA	556	pep chromosome:ASM465v1:1:6389528:6395907:-1 gene:BGIOSGA002150 transcript:BGIOSGA002150-TA gene-biotype:protein-coding transcript-biotype:protein-coding	BGIOSGA002150-PA	556	556	S	QSGDQLSSQHPGNVFSPRLLTSLSSIDITAK	68.411	68.411	SQSGDQLS(0.001)S(0.002)QHPGNVFS(0.998)PR	S(-53.32)QS(-51.44)GDQLS(-30.35)S(-28.22)QHPGNVFS(28.22)PR	17	2	0.68651										19149000	5492500	9109500
BGIOSGA002150-PA	85.547	787	BGIOSGA002150-PA	564	pep chromosome:ASM465v1:1:6389528:6395907:-1 gene:BGIOSGA002150 transcript:BGIOSGA002150-TA gene-biotype:protein-coding transcript-biotype:protein-coding	BGIOSGA002150-PA	564	564	S	QHPGNVFSPRLLTSLSSIDITAKENKGIKRH	59.248	59.248	LLT(0.003)S(0.012)LS(0.771)S(0.199)IDIT(0.015)AK	LLT(-23.54)S(-18.08)LS(5.87)S(-5.87)IDIT(-17.25)AK	6	2	3.348
BGIOSGA002150-PA	85.547	787	BGIOSGA002150-PA	69	pep chromosome:ASM465v1:1:6389528:6395907:-1 gene:BGIOSGA002150 transcript:BGIOSGA002150-TA gene-biotype:protein-coding transcript-biotype:protein-coding	BGIOSGA002150-PA	69	69	S	KEQAKSQKQKPVKVQSGVTEESIDPYSVRVI	128.45	128.45	VQS(1)GVTEESIDPYSVR	VQS(35.68)GVT(-35.68)EES(-76.2)IDPY(-114.01)S(-106.61)VR	3	2	-0.26633
BGIOSGA002151-PA	34.636	317	BGIOSGA002151-PA	58	pep chromosome:ASM465v1:1:6378496:6382826:-1 gene:BGIOSGA002151 transcript:BGIOSGA002151-TA gene-biotype:protein-coding transcript-biotype:protein-coding	BGIOSGA002151-PA	58	58	S	NPAAKEFVPSSAAVSSPSRKALSADAPVFDY	177.63	166.64	EFVPSSAAVS(0.052)S(0.749)PS(0.198)R	EFVPS(-97.42)S(-69.89)AAVS(-11.55)S(5.78)PS(-5.78)R	11	2	-0.17785			10180000							4418700	4529900
BGIOSGA002151-PA	34.636	317	BGIOSGA002151-PA	57	pep chromosome:ASM465v1:1:6378496:6382826:-1 gene:BGIOSGA002151 transcript:BGIOSGA002151-TA gene-biotype:protein-coding transcript-biotype:protein-coding	BGIOSGA002151-PA	57	57	S	LNPAAKEFVPSSAAVSSPSRKALSADAPVFD	164.2	164.2	EFVPSSAAVS(0.805)S(0.162)PS(0.033)R	EFVPS(-96.2)S(-72.58)AAVS(6.97)S(-6.97)PS(-13.86)R	10	2	0.1675			73502000		32884000		47715000	35067000	23641000	46543000	25997000
BGIOSGA002161-PA	45.239	404	BGIOSGA002161-PA	225	pep chromosome:ASM465v1:1:6207520:6211077:-1 gene:BGIOSGA002161 transcript:BGIOSGA002161-TA gene-biotype:protein-coding transcript-biotype:protein-coding	BGIOSGA002161-PA	225	225	Y	FGSAKVLVPGEPNISYICSRYYRAPELIFGA	103.44	83.314	VLVPGEPNIS(0.121)Y(0.865)ICS(0.014)R	VLVPGEPNIS(-8.55)Y(8.55)ICS(-17.92)R	11	2	1.2645	50920000	55204000	65618000	136880000	41846000	36924000			13717000	10488000	29372000	8544200
BGIOSGA002167-PA	55.279	512	BGIOSGA002167-PA	296	pep chromosome:ASM465v1:1:6129869:6134479:-1 gene:BGIOSGA002167 transcript:BGIOSGA002167-TA gene-biotype:protein-coding transcript-biotype:protein-coding	BGIOSGA002167-PA	296	296	S	ADAQICAKEEANADSSDDEQAVHYKRGSSAN	56.081	56.081	EEANADS(0.429)S(0.571)DDEQAVHYK	EEANADS(-1.25)S(1.25)DDEQAVHY(-50.54)K	8	3	0.81656			36477000
BGIOSGA002167-PA	55.279	512	BGIOSGA002167-PA	418	pep chromosome:ASM465v1:1:6129869:6134479:-1 gene:BGIOSGA002167 transcript:BGIOSGA002167-TA gene-biotype:protein-coding transcript-biotype:protein-coding	BGIOSGA002167-PA	418	418	T	NGPPPNDNKQDHAAETASNSPKRRKVLKTRI	104.55	104.55	QDHAAET(0.538)AS(0.142)NS(0.32)PKR	QDHAAET(2.26)AS(-5.8)NS(-2.26)PKR	7	2	0.33074			16239000
BGIOSGA002167-PA	55.279	512	BGIOSGA002167-PA	422	pep chromosome:ASM465v1:1:6129869:6134479:-1 gene:BGIOSGA002167 transcript:BGIOSGA002167-TA gene-biotype:protein-coding transcript-biotype:protein-coding	BGIOSGA002167-PA	422	422	S	PNDNKQDHAAETASNSPKRRKVLKTRIDERG	188.12	188.12	QDHAAET(0.004)AS(0.049)NS(0.946)PK	QDHAAET(-23.24)AS(-12.83)NS(12.83)PK	11	2	0.54917				13758000		6810100				16037000	7166000	13349000
BGIOSGA002167-PA	55.279	512	BGIOSGA002167-PA	295	pep chromosome:ASM465v1:1:6129869:6134479:-1 gene:BGIOSGA002167 transcript:BGIOSGA002167-TA gene-biotype:protein-coding transcript-biotype:protein-coding	BGIOSGA002167-PA	295	295	S	TADAQICAKEEANADSSDDEQAVHYKRGSSA	165.24	165.24	EEANADS(0.963)S(0.037)DDEQAVHYK	EEANADS(14.14)S(-14.14)DDEQAVHY(-94.52)K	7	2	0.022225	23741000	27810000	69964000	14174000	8963400						3569600
BGIOSGA002167-PA	55.279	512	BGIOSGA002167-PA	199	pep chromosome:ASM465v1:1:6129869:6134479:-1 gene:BGIOSGA002167 transcript:BGIOSGA002167-TA gene-biotype:protein-coding transcript-biotype:protein-coding	BGIOSGA002167-PA	199	199	S	EQSAKGQQQGLPGSSSPKKGTSNKAEKDISS	83.474	83.474	GQQQGLPGS(0.094)S(0.248)S(0.658)PK	GQQQGLPGS(-8.46)S(-4.24)S(4.24)PK	11	2	-0.27887		71681000		1856200			10575000		1916700	36654000	22133000
BGIOSGA002167-PA	55.279	512	BGIOSGA002167-PA	198	pep chromosome:ASM465v1:1:6129869:6134479:-1 gene:BGIOSGA002167 transcript:BGIOSGA002167-TA gene-biotype:protein-coding transcript-biotype:protein-coding	BGIOSGA002167-PA	198	198	S	KEQSAKGQQQGLPGSSSPKKGTSNKAEKDIS	107.53	85.271	GQQQGLPGS(0.159)S(0.55)S(0.291)PK	GQQQGLPGS(-5.38)S(2.76)S(-2.76)PK	10	2	-0.76053
BGIOSGA002167-PA	55.279	512	BGIOSGA002167-PA	197	pep chromosome:ASM465v1:1:6129869:6134479:-1 gene:BGIOSGA002167 transcript:BGIOSGA002167-TA gene-biotype:protein-coding transcript-biotype:protein-coding	BGIOSGA002167-PA	197	197	S	PKEQSAKGQQQGLPGSSSPKKGTSNKAEKDI	107.53	107.53	GQQQGLPGS(0.445)S(0.445)S(0.109)PK	GQQQGLPGS(0)S(0)S(-6.1)PK	9	2	0.15637
BGIOSGA002172-PA	35.663	334	BGIOSGA002172-PA	142	pep chromosome:ASM465v1:1:6080737:6082676:-1 gene:BGIOSGA002172 transcript:BGIOSGA002172-TA gene-biotype:protein-coding transcript-biotype:protein-coding	BGIOSGA002172-PA	142	142	S	GNPILPWLKTLSNSPSSKKHPQLPPLLIHGG	62.894	62.894	TLSNS(0.03)PS(0.81)S(0.16)K	T(-52.82)LS(-33.34)NS(-14.33)PS(7.06)S(-7.06)K	7	2	-0.56466							6355700	5522200	6472700	12305000		9408800
BGIOSGA002192-PA	70.623	632	BGIOSGA002192-PA	91	pep chromosome:ASM465v1:1:5729238:5735307:-1 gene:BGIOSGA002192 transcript:BGIOSGA002192-TA gene-biotype:protein-coding transcript-biotype:protein-coding	BGIOSGA002192-PA	91	91	S	GKGGFGQVYVGRRISSPTHGNRNSGANALEV	73.887	73.887	IS(0.101)S(0.899)PTHGNR	IS(-9.51)S(9.51)PT(-32.72)HGNR	3	2	-0.26908		18937000	23170000	7519900			10725000	8841400	9703000	42716000	20329000	35590000
BGIOSGA002213-PA	38.812	347	BGIOSGA002213-PA	312	pep chromosome:ASM465v1:1:5361067:5363592:-1 gene:BGIOSGA002213 transcript:BGIOSGA002213-TA gene-biotype:protein-coding transcript-biotype:protein-coding	BGIOSGA002213-PA	312	312	S	FLMGYGLYRPSQLDSSPRSTLNPFCISPELL	166.65	166.65	PSQLDS(0.069)S(0.931)PR	PS(-126.73)QLDS(-11.31)S(11.31)PR	7	2	-0.30577										20395000		12654000
BGIOSGA002213-PA	38.812	347	BGIOSGA002213-PA	311	pep chromosome:ASM465v1:1:5361067:5363592:-1 gene:BGIOSGA002213 transcript:BGIOSGA002213-TA gene-biotype:protein-coding transcript-biotype:protein-coding	BGIOSGA002213-PA	311	311	S	YFLMGYGLYRPSQLDSSPRSTLNPFCISPEL	169.52	169.52	PSQLDS(0.743)S(0.257)PR	PS(-133.87)QLDS(4.62)S(-4.62)PR	6	2	-0.49855											12787000
BGIOSGA002217-PA	41.498	386	BGIOSGA002217-PA	186	pep chromosome:ASM465v1:1:5323908:5325068:-1 gene:BGIOSGA002217 transcript:BGIOSGA002217-TA gene-biotype:protein-coding transcript-biotype:protein-coding	BGIOSGA002217-PA	186	186	S	AHTPDQLRVLPAQQSSPRSVASSPLAESYDG	141.44	141.44	VLPAQQS(0.114)S(0.886)PR	VLPAQQS(-8.89)S(8.89)PR	8	2	-0.043404				2296300	14143000	15013000	3804100			10754000	5217600
BGIOSGA002217-PA	41.498	386	BGIOSGA002217-PA	185	pep chromosome:ASM465v1:1:5323908:5325068:-1 gene:BGIOSGA002217 transcript:BGIOSGA002217-TA gene-biotype:protein-coding transcript-biotype:protein-coding	BGIOSGA002217-PA	185	185	S	FAHTPDQLRVLPAQQSSPRSVASSPLAESYD	100.69	100.69	VLPAQQS(0.692)S(0.308)PR	VLPAQQS(3.52)S(-3.52)PR	7	2	-0.1618										10754000	5217600	11133000
BGIOSGA002232-PA	39.043	366	BGIOSGA002232-PA	221	pep chromosome:ASM465v1:1:5122371:5125981:-1 gene:BGIOSGA002232 transcript:BGIOSGA002232-TA gene-biotype:protein-coding transcript-biotype:protein-coding	BGIOSGA002232-PA	221	221	S	SHLVKQKEPEFARHLSDLQLRKHEESEFTEP	106.35	106.35	HLS(1)DLQLR	HLS(106.35)DLQLR	3	2	-0.651										20673000
BGIOSGA002235-PA	76.974	676	BGIOSGA002235-PA	670	pep chromosome:ASM465v1:1:5035933:5044942:-1 gene:BGIOSGA002235 transcript:BGIOSGA002235-TA gene-biotype:protein-coding transcript-biotype:protein-coding	BGIOSGA002235-PA	670	670	S	SREPNGRDKHMHTVSSGDPMIQ---------	93.839	93.839	HMHT(0.007)VS(0.399)S(0.594)GDPMIQ	HMHT(-19.14)VS(-1.73)S(1.73)GDPMIQ	7	2	-0.58071
BGIOSGA002235-PA	76.974	676	BGIOSGA002235-PA	617	pep chromosome:ASM465v1:1:5035933:5044942:-1 gene:BGIOSGA002235 transcript:BGIOSGA002235-TA gene-biotype:protein-coding transcript-biotype:protein-coding	BGIOSGA002235-PA	617	617	T	RKMMLNSKDLSFVGYTYKNFDAVKGLKHSDQ	119.45	119.45	DLSFVGYT(1)YK	DLS(-58.1)FVGY(-52.83)T(52.83)Y(-62.72)K	8	2	0.16104	10827000	14607000
BGIOSGA002235-PA	76.974	676	BGIOSGA002235-PA	669	pep chromosome:ASM465v1:1:5035933:5044942:-1 gene:BGIOSGA002235 transcript:BGIOSGA002235-TA gene-biotype:protein-coding transcript-biotype:protein-coding	BGIOSGA002235-PA	669	669	S	PSREPNGRDKHMHTVSSGDPMIQ--------	120.86	120.86	HMHT(0.015)VS(0.848)S(0.137)GDPMIQ	HMHT(-17.64)VS(7.92)S(-7.92)GDPMIQ	6	2	-0.11631
BGIOSGA002258-PA	22.52	203	BGIOSGA002258-PA;BGIOSGA008732-PA	123;126	pep chromosome:ASM465v1:1:4638112:4641368:-1 gene:BGIOSGA002258 transcript:BGIOSGA002258-TA gene-biotype:protein-coding transcript-biotype:protein-coding;pep chromosome:ASM465v1:2:28185833:28188269:1 gene:BGIOSGA008732 transcript:BGIOSGA008732-TA gene-biot	BGIOSGA002258-PA	123	123	S	RYASDNVNKLLVGNKSDLTANKVVSSETAKA	164.41	160.63	LLVGNKS(1)DLTANK	LLVGNKS(36.68)DLT(-36.68)ANK	7	2	0.58224					37588000	16751000				99630000	71937000	94178000
BGIOSGA002286-PA	20.661	194	BGIOSGA002286-PA	17	pep chromosome:ASM465v1:1:4292076:4293215:-1 gene:BGIOSGA002286 transcript:BGIOSGA002286-TA gene-biotype:protein-coding transcript-biotype:protein-coding	BGIOSGA002286-PA	17	17	T	AAQEQEQEKQQAKTSTTSSLPSSSERSSSSA	132.79	105.65	T(0.015)S(0.015)T(0.873)T(0.096)S(0.001)SLPSSSER	T(-17.63)S(-17.63)T(9.59)T(-9.59)S(-31.17)S(-35.39)LPS(-47.68)S(-51.67)S(-48.24)ER	3	2	-1.6827	14786000					19429000	6208500	3992900	3398300		8851000	13151000
BGIOSGA002286-PA	20.661	194	BGIOSGA002286-PA	16	pep chromosome:ASM465v1:1:4292076:4293215:-1 gene:BGIOSGA002286 transcript:BGIOSGA002286-TA gene-biotype:protein-coding transcript-biotype:protein-coding	BGIOSGA002286-PA	16	16	S	MAAQEQEQEKQQAKTSTTSSLPSSSERSSSS	68.676	68.676	T(0.319)S(0.319)T(0.319)T(0.035)S(0.005)S(0.002)LPSS(0.001)SER	T(0)S(0)T(0)T(-9.56)S(-18.45)S(-21.88)LPS(-28.93)S(-27.45)S(-31.15)ER	2	2	0.16684
BGIOSGA002286-PA	20.661	194	BGIOSGA002286-PA	30	pep chromosome:ASM465v1:1:4292076:4293215:-1 gene:BGIOSGA002286 transcript:BGIOSGA002286-TA gene-biotype:protein-coding transcript-biotype:protein-coding	BGIOSGA002286-PA	30	30	S	TSTTSSLPSSSERSSSSAPNNLKEGGGGVES	95.642	77.192	S(0.001)S(0.001)S(0.997)S(0.002)APNNLK	S(-32.77)S(-32.77)S(28.19)S(-28.19)APNNLK	3	2	0.579	16564000		4172800	3990500		16395000	11344000	3840700	13793000	20964000	9494700
BGIOSGA002286-PA	20.661	194	BGIOSGA002286-PA	45	pep chromosome:ASM465v1:1:4292076:4293215:-1 gene:BGIOSGA002286 transcript:BGIOSGA002286-TA gene-biotype:protein-coding transcript-biotype:protein-coding	BGIOSGA002286-PA	45	45	S	SSAPNNLKEGGGGVESDEEIRRVPEMGGGGG	180.11	54.368	EGGGGVES(1)DEEIRR	EGGGGVES(54.37)DEEIRR	8	3	0.068822	30071000	27669000	9420100	32818000	18419000	124610000	196010000	111410000	180930000	161710000	114680000	104920000
BGIOSGA002286-PA	20.661	194	BGIOSGA002286-PA	18	pep chromosome:ASM465v1:1:4292076:4293215:-1 gene:BGIOSGA002286 transcript:BGIOSGA002286-TA gene-biotype:protein-coding transcript-biotype:protein-coding	BGIOSGA002286-PA	18	18	T	AQEQEQEKQQAKTSTTSSLPSSSERSSSSAP	157.56	154.23	TST(0.009)T(0.987)S(0.003)S(0.001)LPSSSER	T(-62.61)S(-62.61)T(-20.36)T(20.36)S(-25.06)S(-32.31)LPS(-49.29)S(-52.48)S(-54.4)ER	4	2	-0.45097	1990700		17780000	4307300	11037000		19409000	9480300	14099000	13186000	7546100
BGIOSGA002286-PA	20.661	194	BGIOSGA002286-PA	15	pep chromosome:ASM465v1:1:4292076:4293215:-1 gene:BGIOSGA002286 transcript:BGIOSGA002286-TA gene-biotype:protein-coding transcript-biotype:protein-coding	BGIOSGA002286-PA	15	15	T	-MAAQEQEQEKQQAKTSTTSSLPSSSERSSS	68.676	68.676	T(0.319)S(0.319)T(0.319)T(0.035)S(0.005)S(0.002)LPSS(0.001)SER	T(0)S(0)T(0)T(-9.56)S(-18.45)S(-21.88)LPS(-28.93)S(-27.45)S(-31.15)ER	1	2	0.16684
BGIOSGA002287-PA	29.877	279	BGIOSGA002287-PA;BGIOSGA002283-PA	25;24	pep chromosome:ASM465v1:1:4279358:4280340:-1 gene:BGIOSGA002287 transcript:BGIOSGA002287-TA gene-biotype:protein-coding transcript-biotype:protein-coding;pep chromosome:ASM465v1:1:4308758:4312835:-1 gene:BGIOSGA002283 transcript:BGIOSGA002283-TA gene-bioty	BGIOSGA002287-PA	25	25	S	WEVGRRRDSEDVIVLSPGPPARRRPPPVKAV	120.92	120.92	DSEDVIVLS(1)PGPPAR	DS(-102.13)EDVIVLS(102.13)PGPPAR	9	2	0.016929										10194000	9850100
BGIOSGA002292-PA	20.109	184	BGIOSGA002292-PA	18	pep chromosome:ASM465v1:1:4182174:4184703:-1 gene:BGIOSGA002292 transcript:BGIOSGA002292-TA gene-biotype:protein-coding transcript-biotype:protein-coding	BGIOSGA002292-PA	18	18	S	ALGGGGGGGGEGGSASRVGDWGVDLGEGWDW	73.983	73.983	AALGGGGGGGGEGGS(0.412)AS(0.588)R	AALGGGGGGGGEGGS(-1.54)AS(1.54)R	17	2	-0.20816	2865400		4240200
BGIOSGA002293-PA	82.588	754	BGIOSGA002293-PA	57	pep chromosome:ASM465v1:1:4173795:4180065:-1 gene:BGIOSGA002293 transcript:BGIOSGA002293-TA gene-biotype:protein-coding transcript-biotype:protein-coding	BGIOSGA002293-PA	57	57	S	TKAVQYDRPTAPPPSSPPAQQPPERPRNSDP	129.01	129.01	AVQYDRPTAPPPS(0.165)S(0.835)PPAQQPPERPR	AVQY(-92.76)DRPT(-74.33)APPPS(-7.06)S(7.06)PPAQQPPERPR	14	4	-0.06091	31833000		56837000							15194000
BGIOSGA002293-PA	82.588	754	BGIOSGA002293-PA	56	pep chromosome:ASM465v1:1:4173795:4180065:-1 gene:BGIOSGA002293 transcript:BGIOSGA002293-TA gene-biotype:protein-coding transcript-biotype:protein-coding	BGIOSGA002293-PA	56	56	S	ETKAVQYDRPTAPPPSSPPAQQPPERPRNSD	129.03	129.03	AVQYDRPTAPPPS(0.569)S(0.431)PPAQQPPERPR	AVQY(-82.19)DRPT(-55.9)APPPS(1.2)S(-1.2)PPAQQPPERPR	13	4	0.077614		49454000			9676300		30481000	3298300	6482600		10439000
BGIOSGA002299-PA	68.913	628	BGIOSGA002299-PA	594	pep chromosome:ASM465v1:1:4127939:4132938:-1 gene:BGIOSGA002299 transcript:BGIOSGA002299-TA gene-biotype:protein-coding transcript-biotype:protein-coding	BGIOSGA002299-PA	594	594	T	GDGLAEKWEASQNVDTPKSVSSELLPPKFMD	165.44	165.44	WEASQNVDT(1)PK	WEAS(-73.69)QNVDT(73.69)PK	9	2	-0.71174	8551700	7592900	15048000	15016000	17695000	17308000				21437000	9929800	23402000
BGIOSGA002299-PA	68.913	628	BGIOSGA002299-PA	600	pep chromosome:ASM465v1:1:4127939:4132938:-1 gene:BGIOSGA002299 transcript:BGIOSGA002299-TA gene-biotype:protein-coding transcript-biotype:protein-coding	BGIOSGA002299-PA	600	600	S	KWEASQNVDTPKSVSSELLPPKFMDFAADES	68.657	68.657	S(0.001)VS(0.292)S(0.707)ELLPPK	S(-27.93)VS(-3.84)S(3.84)ELLPPK	4	2	-0.018713			9486600			5765400
BGIOSGA002299-PA	68.913	628	BGIOSGA002299-PA	465	pep chromosome:ASM465v1:1:4127939:4132938:-1 gene:BGIOSGA002299 transcript:BGIOSGA002299-TA gene-biotype:protein-coding transcript-biotype:protein-coding	BGIOSGA002299-PA	465	465	T	FGLAKLLDHRESHVTTAVRGTVGHIAPEYLS	79.659	79.659	ESHVT(0.5)T(0.5)AVR	ES(-40.78)HVT(0)T(0)AVR	6	2	0.014536
BGIOSGA002299-PA	68.913	628	BGIOSGA002299-PA	464	pep chromosome:ASM465v1:1:4127939:4132938:-1 gene:BGIOSGA002299 transcript:BGIOSGA002299-TA gene-biotype:protein-coding transcript-biotype:protein-coding	BGIOSGA002299-PA	464	464	T	DFGLAKLLDHRESHVTTAVRGTVGHIAPEYL	166.87	166.87	ES(0.001)HVT(0.997)T(0.001)AVR	ES(-28.66)HVT(28.66)T(-29.09)AVR	5	2	-0.050511	14570000	20853000		26295000	38920000	16421000	6950200		13349000	25877000	13494000
BGIOSGA002299-PA	68.913	628	BGIOSGA002299-PA	599	pep chromosome:ASM465v1:1:4127939:4132938:-1 gene:BGIOSGA002299 transcript:BGIOSGA002299-TA gene-biotype:protein-coding transcript-biotype:protein-coding	BGIOSGA002299-PA	599	599	S	EKWEASQNVDTPKSVSSELLPPKFMDFAADE	125.72	115.39	S(0.001)VS(0.981)S(0.017)ELLPPK	S(-28.51)VS(17.57)S(-17.57)ELLPPK	3	2	0.54079	3309100	7031400	6659100	6392100	7860900	5322700
BGIOSGA002299-PA	68.913	628	BGIOSGA002299-PA	461	pep chromosome:ASM465v1:1:4127939:4132938:-1 gene:BGIOSGA002299 transcript:BGIOSGA002299-TA gene-biotype:protein-coding transcript-biotype:protein-coding	BGIOSGA002299-PA	461	461	S	IVGDFGLAKLLDHRESHVTTAVRGTVGHIAP	109.79	86.488	LLDHRES(0.991)HVT(0.007)T(0.002)AVR	LLDHRES(21.26)HVT(-21.26)T(-27.51)AVR	7	4	-0.18993					8960800				1575100	14363000	6857400	13835000
BGIOSGA002303-PA	61.289	580	BGIOSGA002303-PA	54	pep chromosome:ASM465v1:1:4047904:4051772:-1 gene:BGIOSGA002303 transcript:BGIOSGA002303-TA gene-biotype:protein-coding transcript-biotype:protein-coding	BGIOSGA002303-PA	54	54	S	PNPQEEGEDRLRRRHSSSNGSADDVLPSYDF	91.086	65.558	RHS(0.563)S(0.174)S(0.177)NGS(0.085)ADDVLPSYDFQPIR	RHS(5.02)S(-5.09)S(-5.02)NGS(-8.21)ADDVLPS(-43.94)Y(-49.66)DFQPIR	3	3	-1.332										27843000
BGIOSGA002303-PA	61.289	580	BGIOSGA002303-PA	488	pep chromosome:ASM465v1:1:4047904:4051772:-1 gene:BGIOSGA002303 transcript:BGIOSGA002303-TA gene-biotype:protein-coding transcript-biotype:protein-coding	BGIOSGA002303-PA	488	488	S	AGMKSSPSPFAPSGPSSGGSGNYGRLPTAQI	66.779	66.779	SSPSPFAPS(0.139)GPS(0.375)S(0.278)GGS(0.207)GNYGR	S(-53.16)S(-53.16)PS(-49.93)PFAPS(-4.3)GPS(1.31)S(-1.31)GGS(-2.58)GNY(-29.77)GR	12	2	-0.15574
BGIOSGA002303-PA	61.289	580	BGIOSGA002303-PA	59	pep chromosome:ASM465v1:1:4047904:4051772:-1 gene:BGIOSGA002303 transcript:BGIOSGA002303-TA gene-biotype:protein-coding transcript-biotype:protein-coding	BGIOSGA002303-PA	59	59	S	EGEDRLRRRHSSSNGSADDVLPSYDFQPIRT	69.398	69.398	RHS(0.218)S(0.218)S(0.218)NGS(0.347)ADDVLPSYDFQPIR	RHS(-2.03)S(-2.03)S(-2.03)NGS(2.03)ADDVLPS(-47.78)Y(-53.5)DFQPIR	8	3	-0.32854
BGIOSGA002303-PA	61.289	580	BGIOSGA002303-PA	55	pep chromosome:ASM465v1:1:4047904:4051772:-1 gene:BGIOSGA002303 transcript:BGIOSGA002303-TA gene-biotype:protein-coding transcript-biotype:protein-coding	BGIOSGA002303-PA	55	55	S	NPQEEGEDRLRRRHSSSNGSADDVLPSYDFQ	46.964	46.964	HS(0.14)S(0.67)S(0.639)NGS(0.551)ADDVLPS(0.001)Y(0.001)DFQPIR	HS(-8.45)S(1.63)S(1.1)NGS(-1.1)ADDVLPS(-33.55)Y(-33.86)DFQPIR	3	2	3.3183
BGIOSGA002303-PA	61.289	580	BGIOSGA002303-PA	56	pep chromosome:ASM465v1:1:4047904:4051772:-1 gene:BGIOSGA002303 transcript:BGIOSGA002303-TA gene-biotype:protein-coding transcript-biotype:protein-coding	BGIOSGA002303-PA	56	56	S	PQEEGEDRLRRRHSSSNGSADDVLPSYDFQP	91.599	72.801	HS(0.042)S(0.202)S(0.713)NGS(0.042)ADDVLPSYDFQPIR	HS(-12.25)S(-5.48)S(5.48)NGS(-12.25)ADDVLPS(-47.48)Y(-54.7)DFQPIR	4	2	-0.69968
BGIOSGA002312-PA	49.816	432	BGIOSGA002312-PA	151	pep chromosome:ASM465v1:1:3906132:3907975:-1 gene:BGIOSGA002312 transcript:BGIOSGA002312-TA gene-biotype:protein-coding transcript-biotype:protein-coding	BGIOSGA002312-PA	151	151	S	RAAGFDVFLSNKSNGSPSPASRKEPEDLASQ	59.367	59.367	SNGS(0.992)PS(0.007)PAS(0.001)R	S(-35.61)NGS(21.69)PS(-21.69)PAS(-28.82)R	4	2	-0.54267	9714200	7583500	7428900									5065000
BGIOSGA002312-PA	49.816	432	BGIOSGA002312-PA	120	pep chromosome:ASM465v1:1:3906132:3907975:-1 gene:BGIOSGA002312 transcript:BGIOSGA002312-TA gene-biotype:protein-coding transcript-biotype:protein-coding	BGIOSGA002312-PA	120	120	S	QGSLAGSDSELQRSPSPSPEPQKSWTREQSP	62.633	62.633	S(0.046)PS(0.947)PS(0.008)PEPQK	S(-13.17)PS(13.17)PS(-20.94)PEPQK	3	2	1.1969
BGIOSGA002350-PA	28.979	269	BGIOSGA002350-PA	265	pep chromosome:ASM465v1:1:3588817:3589698:-1 gene:BGIOSGA002350 transcript:BGIOSGA002350-TA gene-biotype:protein-coding transcript-biotype:protein-coding	BGIOSGA002350-PA	265	265	S	AVHEFGRRKDGDGAASPPPA-----------	76.073	76.073	RKDGDGAAS(1)PPPA	RKDGDGAAS(76.07)PPPA	9	2	-0.071654					16511000							4728600
BGIOSGA002351-PA	99.422	906	BGIOSGA002351-PA	811	pep chromosome:ASM465v1:1:3582990:3587969:-1 gene:BGIOSGA002351 transcript:BGIOSGA002351-TA gene-biotype:protein-coding transcript-biotype:protein-coding	BGIOSGA002351-PA	811	811	S	LACGEDCVKKVKAADSELHLRKIQEIKTPAV	80.706	80.706	AADS(1)ELHLR	AADS(80.71)ELHLR	4	2	0.19167
BGIOSGA002365-PA	36.893	324	BGIOSGA002365-PA	283	pep chromosome:ASM465v1:1:3476377:3478701:-1 gene:BGIOSGA002365 transcript:BGIOSGA002365-TA gene-biotype:protein-coding transcript-biotype:protein-coding	BGIOSGA002365-PA	283	283	S	RSPAPRDSRSPMRADSRSPADHERRDMSTAA	121.48	76.358	ADS(1)RS(1)PADHER	ADS(76.36)RS(76.36)PADHER	3	2	-0.54579	47217000	66176000	73457000	20427000	51525000	124110000	158760000	132350000	43152000	450440000	174430000	287680000
BGIOSGA002365-PA	36.893	324	BGIOSGA002365-PA	285	pep chromosome:ASM465v1:1:3476377:3478701:-1 gene:BGIOSGA002365 transcript:BGIOSGA002365-TA gene-biotype:protein-coding transcript-biotype:protein-coding	BGIOSGA002365-PA	285	285	S	PAPRDSRSPMRADSRSPADHERRDMSTAANG	126.71	76.358	ADS(1)RS(1)PADHER	ADS(76.36)RS(76.36)PADHER	5	2	-0.54579	44348000	88278000	68133000	7084000	54460000	103500000	196370000	155860000	66084000	517540000	212290000	342480000
BGIOSGA002365-PA	36.893	324	BGIOSGA002365-PA	215	pep chromosome:ASM465v1:1:3476377:3478701:-1 gene:BGIOSGA002365 transcript:BGIOSGA002365-TA gene-biotype:protein-coding transcript-biotype:protein-coding	BGIOSGA002365-PA	215	215	S	RSPRDSRSPRGSPRDSRSPRGSPRDSRSPKG	53.136	41.621	GS(0.005)PRDS(0.996)RS(0.999)PR	GS(-24.38)PRDS(24.38)RS(28.77)PR	6	3	-0.044626	9700700	28970000	13055000	7611900	11425000	58160000	35416000	23601000	24966000	194190000	92015000	113560000
BGIOSGA002365-PA	36.893	324	BGIOSGA002365-PA	267	pep chromosome:ASM465v1:1:3476377:3478701:-1 gene:BGIOSGA002365 transcript:BGIOSGA002365-TA gene-biotype:protein-coding transcript-biotype:protein-coding	BGIOSGA002365-PA	267	267	S	ASPPNGRNRSPTPNASRSPAPRDSRSPMRAD	109.47	83.751	NRS(1)PT(1)PNAS(1)RS(1)PAPR	NRS(83.75)PT(83.75)PNAS(83.75)RS(83.75)PAPR	9	2	-0.24529	8884900	42318000	11446000		6654100	42669000	7579600	17074000	14073000	84127000	34601000	31341000
BGIOSGA002365-PA	36.893	324	BGIOSGA002365-PA	277	pep chromosome:ASM465v1:1:3476377:3478701:-1 gene:BGIOSGA002365 transcript:BGIOSGA002365-TA gene-biotype:protein-coding transcript-biotype:protein-coding	BGIOSGA002365-PA	277	277	S	PTPNASRSPAPRDSRSPMRADSRSPADHERR	52.453	52.453	S(1)PAPRDS(1)RS(1)PMR	S(52.45)PAPRDS(52.45)RS(52.45)PMR	9	3	0.45869	4122900	14833000	13370000	815620	26426000	11708000	10201000	5897500	3524500	47315000	15525000	37734000
BGIOSGA002365-PA	36.893	324	BGIOSGA002365-PA	158	pep chromosome:ASM465v1:1:3476377:3478701:-1 gene:BGIOSGA002365 transcript:BGIOSGA002365-TA gene-biotype:protein-coding transcript-biotype:protein-coding	BGIOSGA002365-PA	158	158	S	ERDCRNSPKNLKRGRSYSRSPSPRRGRSRGR	46.797	46.797	GRS(0.98)Y(0.294)S(0.952)RS(0.934)PS(0.84)PR	GRS(15.58)Y(-6.45)S(11.68)RS(10.28)PS(6.45)PR	3	2	0.26172
BGIOSGA002365-PA	36.893	324	BGIOSGA002365-PA	162	pep chromosome:ASM465v1:1:3476377:3478701:-1 gene:BGIOSGA002365 transcript:BGIOSGA002365-TA gene-biotype:protein-coding transcript-biotype:protein-coding	BGIOSGA002365-PA	162	162	S	RNSPKNLKRGRSYSRSPSPRRGRSRGRSYSR	60.08	60.08	S(0.074)Y(0.034)S(0.908)RS(0.988)PS(0.997)PR	S(-11.42)Y(-15.78)S(11.42)RS(23.1)PS(29.9)PR	5	2	0.055336		52878000	37099000	27469000	115370000	197720000	26477000	14084000	13358000	95136000	24649000	15213000
BGIOSGA002365-PA	36.893	324	BGIOSGA002365-PA	237	pep chromosome:ASM465v1:1:3476377:3478701:-1 gene:BGIOSGA002365 transcript:BGIOSGA002365-TA gene-biotype:protein-coding transcript-biotype:protein-coding	BGIOSGA002365-PA	237	237	S	PRDSRSPKGSPRDTQSPRGSPRDSRSPRRSA	74.094	74.094	DT(0.042)QS(0.958)PRGS(1)PR	DT(-13.58)QS(13.58)PRGS(44.56)PR	4	2	-0.30723						13608000	38890000	29928000	26234000	111560000	49374000	65522000
BGIOSGA002365-PA	36.893	324	BGIOSGA002365-PA	241	pep chromosome:ASM465v1:1:3476377:3478701:-1 gene:BGIOSGA002365 transcript:BGIOSGA002365-TA gene-biotype:protein-coding transcript-biotype:protein-coding	BGIOSGA002365-PA	241	241	S	RSPKGSPRDTQSPRGSPRDSRSPRRSASPPN	74.094	74.094	DT(0.042)QS(0.958)PRGS(1)PR	DT(-13.58)QS(13.58)PRGS(44.56)PR	8	2	-0.30723						13608000	38890000	29928000	26234000	111560000	49374000	65522000
BGIOSGA002365-PA	36.893	324	BGIOSGA002365-PA	263	pep chromosome:ASM465v1:1:3476377:3478701:-1 gene:BGIOSGA002365 transcript:BGIOSGA002365-TA gene-biotype:protein-coding transcript-biotype:protein-coding	BGIOSGA002365-PA	263	263	T	PRRSASPPNGRNRSPTPNASRSPAPRDSRSP	136.01	83.751	NRS(1)PT(1)PNAS(1)RS(1)PAPR	NRS(83.75)PT(83.75)PNAS(83.75)RS(83.75)PAPR	5	2	-0.24529	76482000	117010000	190000000	86285000	146970000	274520000	72335000	66127000	79719000	453740000	200900000	404580000
BGIOSGA002365-PA	36.893	324	BGIOSGA002365-PA	275	pep chromosome:ASM465v1:1:3476377:3478701:-1 gene:BGIOSGA002365 transcript:BGIOSGA002365-TA gene-biotype:protein-coding transcript-biotype:protein-coding	BGIOSGA002365-PA	275	275	S	RSPTPNASRSPAPRDSRSPMRADSRSPADHE	74.464	52.453	S(1)PAPRDS(1)RS(1)PMR	S(52.45)PAPRDS(52.45)RS(52.45)PMR	7	3	0.45869	43215000	82759000	125610000	141860000	120380000	128110000	10201000	5897500	126020000	667080000	305510000	498070000
BGIOSGA002365-PA	36.893	324	BGIOSGA002365-PA	160	pep chromosome:ASM465v1:1:3476377:3478701:-1 gene:BGIOSGA002365 transcript:BGIOSGA002365-TA gene-biotype:protein-coding transcript-biotype:protein-coding	BGIOSGA002365-PA	160	160	S	DCRNSPKNLKRGRSYSRSPSPRRGRSRGRSY	60.08	46.797	GRS(0.98)Y(0.294)S(0.952)RS(0.934)PS(0.84)PR	GRS(15.58)Y(-6.45)S(11.68)RS(10.28)PS(6.45)PR	5	2	0.26172		52878000	27760000		94552000	159800000	4953500			36835000		15213000
BGIOSGA002365-PA	36.893	324	BGIOSGA002365-PA	164	pep chromosome:ASM465v1:1:3476377:3478701:-1 gene:BGIOSGA002365 transcript:BGIOSGA002365-TA gene-biotype:protein-coding transcript-biotype:protein-coding	BGIOSGA002365-PA	164	164	S	SPKNLKRGRSYSRSPSPRRGRSRGRSYSRSR	60.08	57.52	S(0.023)Y(0.043)S(0.951)RS(0.984)PS(1)PR	S(-18.72)Y(-14.71)S(14.71)RS(21.84)PS(39.48)PR	7	2	0.11365		52878000	37099000	27469000	115370000	197720000	26477000	14084000	13358000	95136000	24649000	15213000
BGIOSGA002365-PA	36.893	324	BGIOSGA002365-PA	304	pep chromosome:ASM465v1:1:3476377:3478701:-1 gene:BGIOSGA002365 transcript:BGIOSGA002365-TA gene-biotype:protein-coding transcript-biotype:protein-coding	BGIOSGA002365-PA	304	304	S	HERRDMSTAANGRSPSPRDYEDNGNHRASPR	166.62	166.62	DMSTAANGRS(1)PS(1)PR	DMS(-62.82)T(-57.51)AANGRS(57.51)PS(81.17)PR	12	2	-0.91546	355390000	380340000	538520000		271140000	355830000	184740000	81324000		198830000	83786000	115480000
BGIOSGA002365-PA	36.893	324	BGIOSGA002365-PA	317	pep chromosome:ASM465v1:1:3476377:3478701:-1 gene:BGIOSGA002365 transcript:BGIOSGA002365-TA gene-biotype:protein-coding transcript-biotype:protein-coding	BGIOSGA002365-PA	317	317	S	SPSPRDYEDNGNHRASPRGSASP--------	189.09	189.09	DYEDNGNHRAS(1)PR	DY(-143.09)EDNGNHRAS(143.09)PR	11	2	0.49523	87837000		343350000		208900000	51649000	142850000	102360000	118300000	380670000	238970000	244330000
BGIOSGA002365-PA	36.893	324	BGIOSGA002365-PA	295	pep chromosome:ASM465v1:1:3476377:3478701:-1 gene:BGIOSGA002365 transcript:BGIOSGA002365-TA gene-biotype:protein-coding transcript-biotype:protein-coding	BGIOSGA002365-PA	295	295	S	RADSRSPADHERRDMSTAANGRSPSPRDYED	68.557	68.557	DMS(0.982)T(0.018)AANGR	DMS(17.28)T(-17.28)AANGR	3	2	0.99214										9860000	4865300	7979200
BGIOSGA002365-PA	36.893	324	BGIOSGA002365-PA	302	pep chromosome:ASM465v1:1:3476377:3478701:-1 gene:BGIOSGA002365 transcript:BGIOSGA002365-TA gene-biotype:protein-coding transcript-biotype:protein-coding	BGIOSGA002365-PA	302	302	S	ADHERRDMSTAANGRSPSPRDYEDNGNHRAS	166.62	166.62	DMSTAANGRS(1)PS(1)PR	DMS(-62.82)T(-57.51)AANGRS(57.51)PS(81.17)PR	10	2	-0.91546	355390000	380340000	550960000	2349500	271140000	363250000	184740000	87883000		206770000	87787000	115480000
BGIOSGA002365-PA	36.893	324	BGIOSGA002365-PA	261	pep chromosome:ASM465v1:1:3476377:3478701:-1 gene:BGIOSGA002365 transcript:BGIOSGA002365-TA gene-biotype:protein-coding transcript-biotype:protein-coding	BGIOSGA002365-PA	261	261	S	RSPRRSASPPNGRNRSPTPNASRSPAPRDSR	174.05	83.751	NRS(1)PT(1)PNAS(1)RS(1)PAPR	NRS(83.75)PT(83.75)PNAS(83.75)RS(83.75)PAPR	3	2	-0.24529	66564000	129140000	109320000	71561000	116890000	269710000	82354000	99023000	117780000	753600000	353930000	567320000
BGIOSGA002365-PA	36.893	324	BGIOSGA002365-PA	251	pep chromosome:ASM465v1:1:3476377:3478701:-1 gene:BGIOSGA002365 transcript:BGIOSGA002365-TA gene-biotype:protein-coding transcript-biotype:protein-coding	BGIOSGA002365-PA	251	251	S	QSPRGSPRDSRSPRRSASPPNGRNRSPTPNA	81.923	42.338	S(1)AS(1)PPNGR	S(42.34)AS(42.34)PPNGR	1	2	-0.71507	25253000	33356000	37065000	9773100	17055000	12634000	26417000	36056000	7837000	29992000	52877000	76611000
BGIOSGA002365-PA	36.893	324	BGIOSGA002365-PA	253	pep chromosome:ASM465v1:1:3476377:3478701:-1 gene:BGIOSGA002365 transcript:BGIOSGA002365-TA gene-biotype:protein-coding transcript-biotype:protein-coding	BGIOSGA002365-PA	253	253	S	PRGSPRDSRSPRRSASPPNGRNRSPTPNASR	115.71	42.338	S(1)AS(1)PPNGR	S(42.34)AS(42.34)PPNGR	3	2	-0.71507	219090000	327160000		9773100	185240000	259490000	121040000	108900000	80504000	335330000	238600000	329590000
BGIOSGA002365-PA	36.893	324	BGIOSGA002365-PA	269	pep chromosome:ASM465v1:1:3476377:3478701:-1 gene:BGIOSGA002365 transcript:BGIOSGA002365-TA gene-biotype:protein-coding transcript-biotype:protein-coding	BGIOSGA002365-PA	269	269	S	PPNGRNRSPTPNASRSPAPRDSRSPMRADSR	105.19	52.453	S(1)PAPRDS(1)RS(1)PMR	S(52.45)PAPRDS(52.45)RS(52.45)PMR	1	3	0.45869	44991000	66951000	124300000	29096000	71741000	83799000	24019000	5342200		43949000		37018000
BGIOSGA002365-PA	36.893	324	BGIOSGA002365-PA	217	pep chromosome:ASM465v1:1:3476377:3478701:-1 gene:BGIOSGA002365 transcript:BGIOSGA002365-TA gene-biotype:protein-coding transcript-biotype:protein-coding	BGIOSGA002365-PA	217	217	S	PRDSRSPRGSPRDSRSPRGSPRDSRSPKGSP	53.136	41.621	GS(0.005)PRDS(0.996)RS(0.999)PR	GS(-24.38)PRDS(24.38)RS(28.77)PR	8	3	-0.044626	9700700	28970000	13055000	7611900	11425000	58160000	35416000	23601000	24966000	194190000	92015000	113560000
BGIOSGA002366-PA	73.056	646	BGIOSGA002366-PA	292	pep chromosome:ASM465v1:1:3459963:3468818:-1 gene:BGIOSGA002366 transcript:BGIOSGA002366-TA gene-biotype:protein-coding transcript-biotype:protein-coding	BGIOSGA002366-PA	292	292	S	LQVDKLKVLATSLSNSSSKAEKRILDHRRQK	89.747	89.747	VLAT(0.001)S(0.051)LS(0.36)NS(0.36)S(0.178)S(0.051)K	VLAT(-26.14)S(-8.51)LS(0)NS(0)S(-3.05)S(-8.47)K	9	2	0.22511
BGIOSGA002366-PA	73.056	646	BGIOSGA002366-PA	591	pep chromosome:ASM465v1:1:3459963:3468818:-1 gene:BGIOSGA002366 transcript:BGIOSGA002366-TA gene-biotype:protein-coding transcript-biotype:protein-coding	BGIOSGA002366-PA	591	591	S	SPVQVPSTPKAETVVSPKSPAKPDQPLDLDS	138.96	79.201	AETVVS(1)PK	AET(-39.58)VVS(39.58)PK	6	2	0.00011048	57554000	36912000		109040000	74228000	119230000	68038000		30370000	73457000	16434000	50202000
BGIOSGA002366-PA	73.056	646	BGIOSGA002366-PA	293	pep chromosome:ASM465v1:1:3459963:3468818:-1 gene:BGIOSGA002366 transcript:BGIOSGA002366-TA gene-biotype:protein-coding transcript-biotype:protein-coding	BGIOSGA002366-PA	293	293	S	QVDKLKVLATSLSNSSSKAEKRILDHRRQKE	59.116	59.116	VLAT(0.006)S(0.017)LS(0.22)NS(0.35)S(0.35)S(0.056)K	VLAT(-17.43)S(-13.05)LS(-2.01)NS(0)S(0)S(-7.98)K	10	2	0.40063
BGIOSGA002366-PA	73.056	646	BGIOSGA002366-PA	594	pep chromosome:ASM465v1:1:3459963:3468818:-1 gene:BGIOSGA002366 transcript:BGIOSGA002366-TA gene-biotype:protein-coding transcript-biotype:protein-coding	BGIOSGA002366-PA	594	594	S	QVPSTPKAETVVSPKSPAKPDQPLDLDSELA	164.43	164.43	S(1)PAKPDQPLDLDSELAK	S(137.19)PAKPDQPLDLDS(-137.19)ELAK	1	2	-0.26174	123610000	82820000	41984000	180630000	190670000	309030000	68038000	63601000	58478000	159310000	100610000	137690000
BGIOSGA002366-PA	73.056	646	BGIOSGA002366-PA	290	pep chromosome:ASM465v1:1:3459963:3468818:-1 gene:BGIOSGA002366 transcript:BGIOSGA002366-TA gene-biotype:protein-coding transcript-biotype:protein-coding	BGIOSGA002366-PA	290	290	S	LALQVDKLKVLATSLSNSSSKAEKRILDHRR	96.464	96.464	VLATS(0.001)LS(0.829)NS(0.03)S(0.051)S(0.089)K	VLAT(-41.15)S(-30.46)LS(9.69)NS(-14.4)S(-12.1)S(-9.69)K	7	2	0.056982					5142800	7955300	1885400			23868000	14502000
BGIOSGA002366-PA	73.056	646	BGIOSGA002366-PA	576	pep chromosome:ASM465v1:1:3459963:3468818:-1 gene:BGIOSGA002366 transcript:BGIOSGA002366-TA gene-biotype:protein-coding transcript-biotype:protein-coding	BGIOSGA002366-PA	576	576	S	RRAKVPTKERAESSPSPVQVPSTPKAETVVS	94.191	94.191	AES(0.001)S(0.019)PS(0.98)PVQVPSTPK	AES(-29.64)S(-17.14)PS(17.14)PVQVPS(-45.37)T(-52.22)PK	6	2	-0.58578				30002000	44271000	49669000
BGIOSGA002374-PA	56.412	498	BGIOSGA002374-PA	10	pep chromosome:ASM465v1:1:3376496:3377992:-1 gene:BGIOSGA002374 transcript:BGIOSGA002374-TA gene-biotype:protein-coding transcript-biotype:protein-coding	BGIOSGA002374-PA	10	10	S	------MASVPSGLVSRPDFGSCMVAATSEM	48.284	48.284	ASVPS(0.5)GLVS(0.5)R	AS(-45.6)VPS(0)GLVS(0)R	9	2	0.83886
BGIOSGA002374-PA	56.412	498	BGIOSGA002374-PA	6	pep chromosome:ASM465v1:1:3376496:3377992:-1 gene:BGIOSGA002374 transcript:BGIOSGA002374-TA gene-biotype:protein-coding transcript-biotype:protein-coding	BGIOSGA002374-PA	6	6	S	----------MASVPSGLVSRPDFGSCMVAA	48.284	48.284	ASVPS(0.5)GLVS(0.5)R	AS(-45.6)VPS(0)GLVS(0)R	5	2	0.83886
BGIOSGA002387-PA	35.808	310	BGIOSGA002387-PA	224	pep chromosome:ASM465v1:1:3175166:3178588:-1 gene:BGIOSGA002387 transcript:BGIOSGA002387-TA gene-biotype:protein-coding transcript-biotype:protein-coding	BGIOSGA002387-PA	224	224	S	ANFYCHILLRNLRSPSGNGGYQIPRGFLFNI	51.528	51.528	S(0.02)PS(0.98)GNGGY(0.001)QIPR	S(-17)PS(17)GNGGY(-30.69)QIPR	3	2	3.0841
BGIOSGA002418-PA	29.464	264	BGIOSGA002418-PA	81	pep chromosome:ASM465v1:1:2782028:2784327:-1 gene:BGIOSGA002418 transcript:BGIOSGA002418-TA gene-biotype:protein-coding transcript-biotype:protein-coding	BGIOSGA002418-PA	81	81	S	ELLRIIDAEIKFAEESDDHDRVEEIPDNFPF	216.48	135.8	FAEES(1)DDHDRVEEIPDNFPFK	FAEES(135.8)DDHDRVEEIPDNFPFK	5	3	1.1905	71460000	89627000	114500000	133530000	65966000	126450000				89727000	78479000	100150000
BGIOSGA002431-PA	70.281	670	BGIOSGA002431-PA	264	pep chromosome:ASM465v1:1:2453368:2455485:-1 gene:BGIOSGA002431 transcript:BGIOSGA002431-TA gene-biotype:protein-coding transcript-biotype:protein-coding	BGIOSGA002431-PA	264	264	S	AAAAVAAARHPHDVQSVPDSPMIDKNSSFGS	44.735	43.408	HPHDVQS(1)VPDS(1)PMIDK	HPHDVQS(43.41)VPDS(43.41)PMIDK	7	2	-0.86903		7606100									3185500
BGIOSGA002431-PA	70.281	670	BGIOSGA002431-PA	279	pep chromosome:ASM465v1:1:2453368:2455485:-1 gene:BGIOSGA002431 transcript:BGIOSGA002431-TA gene-biotype:protein-coding transcript-biotype:protein-coding	BGIOSGA002431-PA	279	279	S	SVPDSPMIDKNSSFGSTSSAPSLSNLPPIRV	60.564	60.564	NS(0.022)S(0.129)FGS(0.208)T(0.208)S(0.208)S(0.208)APS(0.014)LSNLPPIR	NS(-9.68)S(-2.07)FGS(0)T(0)S(0)S(0)APS(-11.72)LS(-28.75)NLPPIR	6	3	-0.28816
BGIOSGA002431-PA	70.281	670	BGIOSGA002431-PA	24	pep chromosome:ASM465v1:1:2453368:2455485:-1 gene:BGIOSGA002431 transcript:BGIOSGA002431-TA gene-biotype:protein-coding transcript-biotype:protein-coding	BGIOSGA002431-PA	24	24	T	VGVGGGGAGAGYPESTESSPRSRGGDSWDEP	69.181	69.181	MDSVPAAGVGVGGGGAGAGYPES(0.232)T(0.366)ES(0.201)S(0.201)PR	MDS(-61.18)VPAAGVGVGGGGAGAGY(-37.29)PES(-1.98)T(1.98)ES(-2.59)S(-2.59)PR	24	3	0.28192
BGIOSGA002431-PA	70.281	670	BGIOSGA002431-PA	148	pep chromosome:ASM465v1:1:2453368:2455485:-1 gene:BGIOSGA002431 transcript:BGIOSGA002431-TA gene-biotype:protein-coding transcript-biotype:protein-coding	BGIOSGA002431-PA	148	148	S	LDNLVDEYDRIAATSSGGGSSRTSRIRLFLF	129.76	129.76	IAATS(0.079)S(0.899)GGGS(0.011)S(0.011)R	IAAT(-38.67)S(-10.55)S(10.55)GGGS(-19.12)S(-19.12)R	6	2	0.25798	18645000			16009000				17943000		34787000	24263000	28016000
BGIOSGA002431-PA	70.281	670	BGIOSGA002431-PA	276	pep chromosome:ASM465v1:1:2453368:2455485:-1 gene:BGIOSGA002431 transcript:BGIOSGA002431-TA gene-biotype:protein-coding transcript-biotype:protein-coding	BGIOSGA002431-PA	276	276	S	DVQSVPDSPMIDKNSSFGSTSSAPSLSNLPP	219.01	216.53	NS(0.033)S(0.967)FGSTSSAPSLSNLPPIR	NS(-14.63)S(14.63)FGS(-72.54)T(-81.24)S(-90.81)S(-106.82)APS(-149.64)LS(-161.77)NLPPIR	3	2	0.013299	34689000	34486000	23039000	61146000		37803000
BGIOSGA002431-PA	70.281	670	BGIOSGA002431-PA	275	pep chromosome:ASM465v1:1:2453368:2455485:-1 gene:BGIOSGA002431 transcript:BGIOSGA002431-TA gene-biotype:protein-coding transcript-biotype:protein-coding	BGIOSGA002431-PA	275	275	S	HDVQSVPDSPMIDKNSSFGSTSSAPSLSNLP	130.11	125.53	NS(0.613)S(0.374)FGS(0.011)T(0.001)SSAPSLSNLPPIR	NS(2.15)S(-2.15)FGS(-17.36)T(-27)S(-36.52)S(-45.9)APS(-75.6)LS(-91.84)NLPPIR	2	2	1.1559		37485000	33160000
BGIOSGA002431-PA	70.281	670	BGIOSGA002431-PA	147	pep chromosome:ASM465v1:1:2453368:2455485:-1 gene:BGIOSGA002431 transcript:BGIOSGA002431-TA gene-biotype:protein-coding transcript-biotype:protein-coding	BGIOSGA002431-PA	147	147	S	DLDNLVDEYDRIAATSSGGGSSRTSRIRLFL	89.663	89.663	IAAT(0.004)S(0.42)S(0.401)GGGS(0.088)S(0.088)R	IAAT(-20.43)S(0.2)S(-0.2)GGGS(-6.81)S(-6.81)R	5	2	-0.24087
BGIOSGA002431-PA	70.281	670	BGIOSGA002431-PA	360	pep chromosome:ASM465v1:1:2453368:2455485:-1 gene:BGIOSGA002431 transcript:BGIOSGA002431-TA gene-biotype:protein-coding transcript-biotype:protein-coding	BGIOSGA002431-PA	360	360	S	AVPSISPSDASSRVFSDDDKSDHGGGGGRKP	138.91	60.918	VFS(1)DDDKS(1)DHGGGGGR	VFS(60.92)DDDKS(60.92)DHGGGGGR	3	2	0.4136	3668400	35383000	45917000	6768600	7505500	9383100	95467000	65332000	44232000	30015000	16144000	9856000
BGIOSGA002431-PA	70.281	670	BGIOSGA002431-PA	281	pep chromosome:ASM465v1:1:2453368:2455485:-1 gene:BGIOSGA002431 transcript:BGIOSGA002431-TA gene-biotype:protein-coding transcript-biotype:protein-coding	BGIOSGA002431-PA	281	281	S	PDSPMIDKNSSFGSTSSAPSLSNLPPIRVRP	60.564	60.564	NS(0.022)S(0.129)FGS(0.208)T(0.208)S(0.208)S(0.208)APS(0.014)LSNLPPIR	NS(-9.68)S(-2.07)FGS(0)T(0)S(0)S(0)APS(-11.72)LS(-28.75)NLPPIR	8	3	-0.28816
BGIOSGA002431-PA	70.281	670	BGIOSGA002431-PA	280	pep chromosome:ASM465v1:1:2453368:2455485:-1 gene:BGIOSGA002431 transcript:BGIOSGA002431-TA gene-biotype:protein-coding transcript-biotype:protein-coding	BGIOSGA002431-PA	280	280	T	VPDSPMIDKNSSFGSTSSAPSLSNLPPIRVR	60.564	60.564	NS(0.022)S(0.129)FGS(0.208)T(0.208)S(0.208)S(0.208)APS(0.014)LSNLPPIR	NS(-9.68)S(-2.07)FGS(0)T(0)S(0)S(0)APS(-11.72)LS(-28.75)NLPPIR	7	3	-0.28816
BGIOSGA002431-PA	70.281	670	BGIOSGA002431-PA	268	pep chromosome:ASM465v1:1:2453368:2455485:-1 gene:BGIOSGA002431 transcript:BGIOSGA002431-TA gene-biotype:protein-coding transcript-biotype:protein-coding	BGIOSGA002431-PA	268	268	S	VAAARHPHDVQSVPDSPMIDKNSSFGSTSSA	92.474	43.408	HPHDVQS(1)VPDS(1)PMIDK	HPHDVQS(43.41)VPDS(43.41)PMIDK	11	2	-0.86903					15616000	11052000						7921600
BGIOSGA002431-PA	70.281	670	BGIOSGA002431-PA	282	pep chromosome:ASM465v1:1:2453368:2455485:-1 gene:BGIOSGA002431 transcript:BGIOSGA002431-TA gene-biotype:protein-coding transcript-biotype:protein-coding	BGIOSGA002431-PA	282	282	S	DSPMIDKNSSFGSTSSAPSLSNLPPIRVRPE	60.564	60.564	NS(0.022)S(0.129)FGS(0.208)T(0.208)S(0.208)S(0.208)APS(0.014)LSNLPPIR	NS(-9.68)S(-2.07)FGS(0)T(0)S(0)S(0)APS(-11.72)LS(-28.75)NLPPIR	9	3	-0.28816
BGIOSGA002431-PA	70.281	670	BGIOSGA002431-PA	399	pep chromosome:ASM465v1:1:2453368:2455485:-1 gene:BGIOSGA002431 transcript:BGIOSGA002431-TA gene-biotype:protein-coding transcript-biotype:protein-coding	BGIOSGA002431-PA	399	399	S	PVADPTNRAMYYNDRSPPAELKRDMPVGTDA	154.74	52.579	S(1)PPAELKR	S(52.58)PPAELKR	1	2	0.16464	36159000	37481000	34497000	2513000	46634000	57016000	27375000	12487000	11936000	20376000	8470200	16660000
BGIOSGA002431-PA	70.281	670	BGIOSGA002431-PA;BGIOSGA024107-PA	61;51	pep chromosome:ASM465v1:1:2453368:2455485:-1 gene:BGIOSGA002431 transcript:BGIOSGA002431-TA gene-biotype:protein-coding transcript-biotype:protein-coding;pep chromosome:ASM465v1:7:20241069:20243109:-1 gene:BGIOSGA024107 transcript:BGIOSGA024107-TA gene-bio	BGIOSGA002431-PA;BGIOSGA024107-PA	61;51	61	S	AAAAAAGGGRLRLMCSFGGRIVPRPTDKSLC;GGGGGGGGAHVRLMCSFGGRILPRPGDHQLR	78.939	78.939	LMCS(1)FGGR	LMCS(78.94)FGGR	4	2	-0.431										15528000	6561300	14526000
BGIOSGA002431-PA	70.281	670	BGIOSGA002431-PA	92	pep chromosome:ASM465v1:1:2453368:2455485:-1 gene:BGIOSGA002431 transcript:BGIOSGA002431-TA gene-biotype:protein-coding transcript-biotype:protein-coding	BGIOSGA002431-PA	92	92	S	YLGGETRIVAVERNASLADVHARLSRSLLGG	70.345	70.345	NAS(1)LADVHAR	NAS(70.34)LADVHAR	3	2	2.0345	12461000											24960000
BGIOSGA002431-PA	70.281	670	BGIOSGA002431-PA	365	pep chromosome:ASM465v1:1:2453368:2455485:-1 gene:BGIOSGA002431 transcript:BGIOSGA002431-TA gene-biotype:protein-coding transcript-biotype:protein-coding	BGIOSGA002431-PA	365	365	S	SPSDASSRVFSDDDKSDHGGGGGRKPQPPKP	158.14	60.918	VFS(1)DDDKS(1)DHGGGGGR	VFS(60.92)DDDKS(60.92)DHGGGGGR	8	2	0.4136	42957000	40206000	65923000	7896400	84565000	81710000	85339000	17361000	10953000	123130000	61715000	97893000
BGIOSGA002446-PA	19.263	181	BGIOSGA002446-PA	44	pep chromosome:ASM465v1:1:2276639:2277184:-1 gene:BGIOSGA002446 transcript:BGIOSGA002446-TA gene-biotype:protein-coding transcript-biotype:protein-coding	BGIOSGA002446-PA	44	44	S	ERVFTRFDADGDGRISPSELAAVTRAIAPPP	319.18	103.46	IS(1)PSELAAVTR	IS(38.63)PS(-38.63)ELAAVT(-92.61)R	2	2	-0.13428	152770000	127870000	71541000	170760000	150060000	267970000	63492000	80552000	158770000	155680000	151730000	24392000
BGIOSGA002446-PA	19.263	181	BGIOSGA002446-PA	46	pep chromosome:ASM465v1:1:2276639:2277184:-1 gene:BGIOSGA002446 transcript:BGIOSGA002446-TA gene-biotype:protein-coding transcript-biotype:protein-coding	BGIOSGA002446-PA	46	46	S	VFTRFDADGDGRISPSELAAVTRAIAPPPSE	87.102	70.413	FDADGDGRIS(0.426)PS(0.574)ELAAVTR	FDADGDGRIS(-1.29)PS(1.29)ELAAVT(-37.43)R	12	2	1.282				7333900	34323000	25301000			7604900	21688000
BGIOSGA002446-PA	19.263	181	BGIOSGA002446-PA	60	pep chromosome:ASM465v1:1:2276639:2277184:-1 gene:BGIOSGA002446 transcript:BGIOSGA002446-TA gene-biotype:protein-coding transcript-biotype:protein-coding	BGIOSGA002446-PA	60	60	S	PSELAAVTRAIAPPPSESAGGREVAAMMNEL	71.558	43.761	AIAPPPS(0.895)ES(0.105)AGGR	AIAPPPS(9.33)ES(-9.33)AGGR	7	2	0.41655					32380000		17992000	4397000	9509300	6581600	3527800
BGIOSGA002446-PA	19.263	181	BGIOSGA002446-PA	62	pep chromosome:ASM465v1:1:2276639:2277184:-1 gene:BGIOSGA002446 transcript:BGIOSGA002446-TA gene-biotype:protein-coding transcript-biotype:protein-coding	BGIOSGA002446-PA	62	62	S	ELAAVTRAIAPPPSESAGGREVAAMMNELDT	95.264	72.88	AIAPPPS(0.149)ES(0.851)AGGR	AIAPPPS(-7.55)ES(7.55)AGGR	9	2	0.34454						35463000				54931000	27979000	55368000
BGIOSGA002461-PA	44.792	391	BGIOSGA002461-PA	51	pep chromosome:ASM465v1:1:2031101:2034155:-1 gene:BGIOSGA002461 transcript:BGIOSGA002461-TA gene-biotype:protein-coding transcript-biotype:protein-coding	BGIOSGA002461-PA	51	51	S	FHRKPPFFSRIFPAGSHGKHRKIAKYYKKQE	56.359	46.352	IFPAGS(1)HGK	IFPAGS(46.35)HGK	6	2	-0.61225							8412100	2876900	2693400	3839400	2091400	2850400
BGIOSGA002466-PA	63.316	586	BGIOSGA002466-PA	497	pep chromosome:ASM465v1:1:1889094:1893684:-1 gene:BGIOSGA002466 transcript:BGIOSGA002466-TA gene-biotype:protein-coding transcript-biotype:protein-coding	BGIOSGA002466-PA	497	497	S	IVTKWSELSHKLSAESLKVTLKNLRTKNEAA	107.57	107.57	LSAES(1)LK	LS(-63.23)AES(63.23)LK	5	2	-0.39499
BGIOSGA002466-PA	63.316	586	BGIOSGA002466-PA	102	pep chromosome:ASM465v1:1:1889094:1893684:-1 gene:BGIOSGA002466 transcript:BGIOSGA002466-TA gene-biotype:protein-coding transcript-biotype:protein-coding	BGIOSGA002466-PA	102	102	S	DPDAARIAAATASAYSDDDDDSDEAQATRPE	328.17	309.95	IAAATASAYS(1)DDDDDSDEAQATRPEGEVK	IAAAT(-93.43)AS(-46.94)AY(-80.26)S(46.94)DDDDDS(-68.44)DEAQAT(-129.88)RPEGEVK	10	3	-0.16327	838140000	1032300000	1117800000	167460000	184880000	111280000	1515700000	618110000	124840000	430760000	325670000	364820000
BGIOSGA002466-PA	63.316	586	BGIOSGA002466-PA	108	pep chromosome:ASM465v1:1:1889094:1893684:-1 gene:BGIOSGA002466 transcript:BGIOSGA002466-TA gene-biotype:protein-coding transcript-biotype:protein-coding	BGIOSGA002466-PA	108	108	S	IAAATASAYSDDDDDSDEAQATRPEGEVKKP	311.26	311.26	IAAATASAYSDDDDDS(1)DEAQATRPEGEVK	IAAAT(-193.25)AS(-167.47)AY(-173.85)S(-98.5)DDDDDS(75.4)DEAQAT(-75.4)RPEGEVK	16	3	-0.21282	88388000	101940000	116230000	68606000	64896000	51831000	56694000	65424000	8249500	21887000	44000000	67691000
BGIOSGA002466-PA	63.316	586	BGIOSGA002466-PA	99	pep chromosome:ASM465v1:1:1889094:1893684:-1 gene:BGIOSGA002466 transcript:BGIOSGA002466-TA gene-biotype:protein-coding transcript-biotype:protein-coding	BGIOSGA002466-PA	99	99	S	DAADPDAARIAAATASAYSDDDDDSDEAQAT	117.62	117.62	IAAAT(0.003)AS(0.534)AY(0.199)S(0.261)DDDDDS(0.003)DEAQATRPEGEVK	IAAAT(-22.47)AS(3.1)AY(-4.29)S(-3.1)DDDDDS(-21.96)DEAQAT(-49.33)RPEGEVK	7	2	0.31478							73792000
BGIOSGA002466-PA	63.316	586	BGIOSGA002466-PA	114	pep chromosome:ASM465v1:1:1889094:1893684:-1 gene:BGIOSGA002466 transcript:BGIOSGA002466-TA gene-biotype:protein-coding transcript-biotype:protein-coding	BGIOSGA002466-PA	114	114	T	SAYSDDDDDSDEAQATRPEGEVKKPKVKKPK	76.519	57.417	IAAATASAYS(0.094)DDDDDS(0.268)DEAQAT(0.638)RPEGEVK	IAAAT(-40.23)AS(-36.51)AY(-33.44)S(-8.3)DDDDDS(-3.77)DEAQAT(3.77)RPEGEVK	22	3	0.092084			11826000	33437000
BGIOSGA002466-PA	63.316	586	BGIOSGA002466-PA	97	pep chromosome:ASM465v1:1:1889094:1893684:-1 gene:BGIOSGA002466 transcript:BGIOSGA002466-TA gene-biotype:protein-coding transcript-biotype:protein-coding	BGIOSGA002466-PA	97	97	T	ARDAADPDAARIAAATASAYSDDDDDSDEAQ	63.726	63.726	IAAAT(0.852)AS(0.064)AY(0.026)S(0.029)DDDDDS(0.029)DEAQATRPEGEVK	IAAAT(11.24)AS(-11.24)AY(-15.18)S(-14.68)DDDDDS(-14.68)DEAQAT(-43.08)RPEGEVK	5	2	0.57865			29670000				20390000			18261000	8861200
BGIOSGA002475-PA	36.065	315	BGIOSGA002475-PA	131	pep chromosome:ASM465v1:1:1725817:1727309:-1 gene:BGIOSGA002475 transcript:BGIOSGA002475-TA gene-biotype:protein-coding transcript-biotype:protein-coding	BGIOSGA002475-PA	131	131	S	KKQAKENANLIDADDSDELRSICSESDEDDM	187.56	127.83	ENANLIDADDS(1)DELR	ENANLIDADDS(127.83)DELR	11	2	3.3809	15993000	19792000	53176000	22462000	19998000	23436000
BGIOSGA002489-PA	73.368	668	BGIOSGA002489-PA	361	pep chromosome:ASM465v1:1:1495419:1500717:-1 gene:BGIOSGA002489 transcript:BGIOSGA002489-TA gene-biotype:protein-coding transcript-biotype:protein-coding	BGIOSGA002489-PA	361	361	S	TESNSSLTNPEGSEFSPKLIQKSTTKHRRGW	116.45	116.45	VAITESNSSLTNPEGS(0.082)EFS(0.918)PK	VAIT(-110.3)ES(-93.9)NS(-80.06)S(-70.89)LT(-52.81)NPEGS(-10.5)EFS(10.5)PK	19	2	1.581						14981000			9861800	24691000
BGIOSGA002495-PA	113.87	986	BGIOSGA002495-PA	977	pep chromosome:ASM465v1:1:1436280:1443081:-1 gene:BGIOSGA002495 transcript:BGIOSGA002495-TA gene-biotype:protein-coding transcript-biotype:protein-coding description:Eukaryotic translation initiation factor 3 subunit A [Source:UniProtKB/TrEMBL;Acc:B8ACZ5]	BGIOSGA002495-PA	977	977	S	GPPGTWRPSRYSSSSSSSTWSSRRN------	92.295	92.295	YSSSS(0.032)S(0.935)S(0.018)S(0.005)T(0.008)WS(0.001)S(0.001)R	Y(-64.87)S(-61.3)S(-34.2)S(-36.4)S(-14.65)S(14.65)S(-17.19)S(-22.94)T(-20.49)WS(-31.99)S(-31.99)R	6	2	2.1951							7005300	1984300
BGIOSGA002495-PA	113.87	986	BGIOSGA002495-PA	976	pep chromosome:ASM465v1:1:1436280:1443081:-1 gene:BGIOSGA002495 transcript:BGIOSGA002495-TA gene-biotype:protein-coding transcript-biotype:protein-coding description:Eukaryotic translation initiation factor 3 subunit A [Source:UniProtKB/TrEMBL;Acc:B8ACZ5]	BGIOSGA002495-PA	976	976	S	DGPPGTWRPSRYSSSSSSSTWSSRRN-----	52.576	52.576	YS(0.001)S(0.066)S(0.037)S(0.357)S(0.357)S(0.08)S(0.043)T(0.057)WS(0.001)S(0.001)R	Y(-31.79)S(-27.05)S(-7.3)S(-9.86)S(0)S(0)S(-6.51)S(-9.19)T(-7.96)WS(-24.25)S(-24.25)R	5	2	-0.071178
BGIOSGA002495-PA	113.87	986	BGIOSGA002495-PA	914	pep chromosome:ASM465v1:1:1436280:1443081:-1 gene:BGIOSGA002495 transcript:BGIOSGA002495-TA gene-biotype:protein-coding transcript-biotype:protein-coding description:Eukaryotic translation initiation factor 3 subunit A [Source:UniProtKB/TrEMBL;Acc:B8ACZ5]	BGIOSGA002495-PA	914	914	S	AGKYVPKFKRGGDGGSSAGGQRPAVAPEQDR	42.973	42.973	RGGDGGS(0.785)S(0.215)AGGQRPAVAPEQDR	RGGDGGS(5.63)S(-5.63)AGGQRPAVAPEQDR	7	3	0.55849							22004000	12306000	10547000		5135900	6352400
BGIOSGA002496-PA	33.55	285	BGIOSGA002496-PA;BGIOSGA002491-PA	224;224	pep chromosome:ASM465v1:1:1432999:1433856:-1 gene:BGIOSGA002496 transcript:BGIOSGA002496-TA gene-biotype:protein-coding transcript-biotype:protein-coding;pep chromosome:ASM465v1:1:1484663:1485520:-1 gene:BGIOSGA002491 transcript:BGIOSGA002491-TA gene-bioty	BGIOSGA002496-PA	224	224	S	DSNNHKHRRSRSLEESSDDVAAGEYEKVRNG	62.924	62.924	S(0.001)LEES(0.5)S(0.5)DDVAAGEYEK	S(-28.24)LEES(0)S(0)DDVAAGEY(-46.39)EK	5	2	1.3966
BGIOSGA002496-PA	33.55	285	BGIOSGA002496-PA;BGIOSGA002491-PA	225;225	pep chromosome:ASM465v1:1:1432999:1433856:-1 gene:BGIOSGA002496 transcript:BGIOSGA002496-TA gene-biotype:protein-coding transcript-biotype:protein-coding;pep chromosome:ASM465v1:1:1484663:1485520:-1 gene:BGIOSGA002491 transcript:BGIOSGA002491-TA gene-bioty	BGIOSGA002496-PA	225	225	S	SNNHKHRRSRSLEESSDDVAAGEYEKVRNGK	69.594	69.594	S(0.001)LEES(0.423)S(0.576)DDVAAGEYEK	S(-30.59)LEES(-1.34)S(1.34)DDVAAGEY(-53.06)EK	6	2	-1.4673
BGIOSGA002496-PA	33.55	285	BGIOSGA002496-PA;BGIOSGA002491-PA	178;178	pep chromosome:ASM465v1:1:1432999:1433856:-1 gene:BGIOSGA002496 transcript:BGIOSGA002496-TA gene-biotype:protein-coding transcript-biotype:protein-coding;pep chromosome:ASM465v1:1:1484663:1485520:-1 gene:BGIOSGA002491 transcript:BGIOSGA002491-TA gene-bioty	BGIOSGA002496-PA	178	178	S	KDHSSSRSHRHHHHRSSGDDSGSESEERGRS	120.84	120.84	S(0.5)S(0.5)GDDSGSESEER	S(0)S(0)GDDS(-79.61)GS(-99.59)ES(-103.05)EER	1	2	0.064455
BGIOSGA002496-PA	33.55	285	BGIOSGA002496-PA;BGIOSGA002491-PA	179;179	pep chromosome:ASM465v1:1:1432999:1433856:-1 gene:BGIOSGA002496 transcript:BGIOSGA002496-TA gene-biotype:protein-coding transcript-biotype:protein-coding;pep chromosome:ASM465v1:1:1484663:1485520:-1 gene:BGIOSGA002491 transcript:BGIOSGA002491-TA gene-bioty	BGIOSGA002496-PA	179	179	S	DHSSSRSHRHHHHRSSGDDSGSESEERGRSR	120.84	120.84	S(0.5)S(0.5)GDDSGSESEER	S(0)S(0)GDDS(-79.61)GS(-99.59)ES(-103.05)EER	2	2	0.064455
BGIOSGA002496-PA	33.55	285	BGIOSGA002496-PA;BGIOSGA002491-PA	202;202	pep chromosome:ASM465v1:1:1432999:1433856:-1 gene:BGIOSGA002496 transcript:BGIOSGA002496-TA gene-biotype:protein-coding transcript-biotype:protein-coding;pep chromosome:ASM465v1:1:1484663:1485520:-1 gene:BGIOSGA002491 transcript:BGIOSGA002491-TA gene-bioty	BGIOSGA002496-PA	202	202	S	SEERGRSRHKKHHRSSDEDATSDSNNHKHRR	142.1	142.1	S(0.5)S(0.5)DEDATSDSNNHK	S(0)S(0)DEDAT(-105.14)S(-115.18)DS(-121.37)NNHK	2	2	-2.2433
BGIOSGA002496-PA	33.55	285	BGIOSGA002496-PA;BGIOSGA002491-PA	201;201	pep chromosome:ASM465v1:1:1432999:1433856:-1 gene:BGIOSGA002496 transcript:BGIOSGA002496-TA gene-biotype:protein-coding transcript-biotype:protein-coding;pep chromosome:ASM465v1:1:1484663:1485520:-1 gene:BGIOSGA002491 transcript:BGIOSGA002491-TA gene-bioty	BGIOSGA002496-PA	201	201	S	ESEERGRSRHKKHHRSSDEDATSDSNNHKHR	142.1	142.1	S(0.5)S(0.5)DEDATSDSNNHK	S(0)S(0)DEDAT(-105.14)S(-115.18)DS(-121.37)NNHK	1	2	-2.2433
BGIOSGA002529-PA	35.518	339	BGIOSGA002529-PA	234	pep chromosome:ASM465v1:1:776803:779936:-1 gene:BGIOSGA002529 transcript:BGIOSGA002529-TA gene-biotype:protein-coding transcript-biotype:protein-coding	BGIOSGA002529-PA	234	234	S	VPPAIGSSERVVRRVSSLPQSTALPALPTTT	58.722	58.722	RVS(0.52)S(0.421)LPQS(0.03)T(0.03)ALPALPTTTPAAEPSPR	RVS(0.92)S(-0.92)LPQS(-12.43)T(-12.43)ALPALPT(-52.02)T(-54.52)T(-56.26)PAAEPS(-58.56)PR	3	3	0.31663				24455000
BGIOSGA002537-PA	112.7	1009	BGIOSGA002537-PA	379	pep chromosome:ASM465v1:1:701530:711191:-1 gene:BGIOSGA002537 transcript:BGIOSGA002537-TA gene-biotype:protein-coding transcript-biotype:protein-coding	BGIOSGA002537-PA	379	379	S	LALNITEKREDSPLPSPSHRPMGRTPSGGQL	66.636	66.636	REDS(1)PLPS(0.985)PS(0.015)HRPMGR	REDS(56.19)PLPS(18.28)PS(-18.28)HRPMGR	8	3	0.44399					24257000		41633000	22807000	1823500	35338000	18131000	20928000
BGIOSGA002537-PA	112.7	1009	BGIOSGA002537-PA	390	pep chromosome:ASM465v1:1:701530:711191:-1 gene:BGIOSGA002537 transcript:BGIOSGA002537-TA gene-biotype:protein-coding transcript-biotype:protein-coding	BGIOSGA002537-PA	390	390	S	SPLPSPSHRPMGRTPSGGQLRKMFTESQIGR	113.66	110.88	TPS(1)GGQLR	T(-34.85)PS(34.85)GGQLR	3	2	0.20198	101750000	95115000	76372000	168810000	91263000	103310000	145650000	64851000	83479000	70246000	38022000	47913000
BGIOSGA002537-PA	112.7	1009	BGIOSGA002537-PA	399	pep chromosome:ASM465v1:1:701530:711191:-1 gene:BGIOSGA002537 transcript:BGIOSGA002537-TA gene-biotype:protein-coding transcript-biotype:protein-coding	BGIOSGA002537-PA	399	399	T	PMGRTPSGGQLRKMFTESQIGRSSFRKLLEP	78.932	78.932	MFT(0.999)ES(0.001)QIGR	MFT(32.9)ES(-32.9)QIGR	3	2	0.70632							23800000	8671600	10798000
BGIOSGA002537-PA	112.7	1009	BGIOSGA002537-PA	375	pep chromosome:ASM465v1:1:701530:711191:-1 gene:BGIOSGA002537 transcript:BGIOSGA002537-TA gene-biotype:protein-coding transcript-biotype:protein-coding	BGIOSGA002537-PA	375	375	S	PKHKLALNITEKREDSPLPSPSHRPMGRTPS	66.636	66.636	REDS(1)PLPS(0.985)PS(0.015)HRPMGR	REDS(56.19)PLPS(18.28)PS(-18.28)HRPMGR	4	3	0.44399					6223400		28784000	14864000		23216000	9451100	9169300
BGIOSGA002542-PA	152.2	1360	BGIOSGA002542-PA	673	pep chromosome:ASM465v1:1:650159:658651:-1 gene:BGIOSGA002542 transcript:BGIOSGA002542-TA gene-biotype:protein-coding transcript-biotype:protein-coding	BGIOSGA002542-PA	673	673	S	EDMYKIIKYSCGEVCSSSDQLDKVVRIWTTF	69.431	69.431	YSCGEVCS(0.728)S(0.21)S(0.062)DQLDK	Y(-41.1)S(-39.3)CGEVCS(5.39)S(-5.39)S(-10.71)DQLDK	8	2	0.10309
BGIOSGA002542-PA	152.2	1360	BGIOSGA002542-PA	792	pep chromosome:ASM465v1:1:650159:658651:-1 gene:BGIOSGA002542 transcript:BGIOSGA002542-TA gene-biotype:protein-coding transcript-biotype:protein-coding	BGIOSGA002542-PA	792	792	S	EEPSNTAVNGRVQGASPGTNEIPAVSTQNMP	77.631	77.631	VQGAS(0.995)PGT(0.005)NEIPAVSTQNMPTER	VQGAS(22.96)PGT(-22.96)NEIPAVS(-54.49)T(-60.96)QNMPT(-73.39)ER	5	2	0.96563				28366000	7664500	13217000				22067000	15945000
BGIOSGA002542-PA	152.2	1360	BGIOSGA002542-PA	518	pep chromosome:ASM465v1:1:650159:658651:-1 gene:BGIOSGA002542 transcript:BGIOSGA002542-TA gene-biotype:protein-coding transcript-biotype:protein-coding	BGIOSGA002542-PA	518	518	S	EELIEKMQDNSLKPDSPIRIDEHLTPLNLRC	79.652	79.652	MQDNSLKPDS(1)PIR	MQDNS(-39.1)LKPDS(39.1)PIR	10	2	-0.68844				3792400							3584700	8409200
BGIOSGA002542-PA	152.2	1360	BGIOSGA002542-PA	1331	pep chromosome:ASM465v1:1:650159:658651:-1 gene:BGIOSGA002542 transcript:BGIOSGA002542-TA gene-biotype:protein-coding transcript-biotype:protein-coding	BGIOSGA002542-PA	1331	1331	S	DTEDFLFRLRKRRRFSPVGNVPEKLQASKTY	83.869	55.415	RFS(1)PVGNVPEK	RFS(55.41)PVGNVPEK	3	2	0.35947				1505500	10569000			2513400	2624800		10268000
BGIOSGA002542-PA	152.2	1360	BGIOSGA002542-PA	1022	pep chromosome:ASM465v1:1:650159:658651:-1 gene:BGIOSGA002542 transcript:BGIOSGA002542-TA gene-biotype:protein-coding transcript-biotype:protein-coding	BGIOSGA002542-PA	1022	1022	S	EEEDMDHDDQDAKAESEGEAEGTTETHDVEG	109.56	109.56	AES(1)EGEAEGTTETHDVEGGISLPLSER	AES(65.45)EGEAEGT(-65.45)T(-72.85)ET(-72.47)HDVEGGIS(-101.71)LPLS(-106.47)ER	3	3	-0.47731
BGIOSGA002542-PA	152.2	1360	BGIOSGA002542-PA	908	pep chromosome:ASM465v1:1:650159:658651:-1 gene:BGIOSGA002542 transcript:BGIOSGA002542-TA gene-biotype:protein-coding transcript-biotype:protein-coding	BGIOSGA002542-PA	908	908	S	ASHNTPKVEREEGELSPNGDFEEDNFAPFED	69.144	69.144	VEREEGELS(1)PNGDFEEDNFAPFEDGAVDGVSK	VEREEGELS(60.53)PNGDFEEDNFAPFEDGAVDGVS(-60.53)K	9	3	4.2678
BGIOSGA002542-PA	152.2	1360	BGIOSGA002542-PA	894	pep chromosome:ASM465v1:1:650159:658651:-1 gene:BGIOSGA002542 transcript:BGIOSGA002542-TA gene-biotype:protein-coding transcript-biotype:protein-coding	BGIOSGA002542-PA	894	894	S	ASEGNKGRLFNEASASHNTPKVEREEGELSP	76.728	76.728	LFNEAS(0.027)AS(0.486)HNT(0.486)PK	LFNEAS(-12.5)AS(0)HNT(0)PK	8	2	-0.6832
BGIOSGA002542-PA	152.2	1360	BGIOSGA002542-PA	897	pep chromosome:ASM465v1:1:650159:658651:-1 gene:BGIOSGA002542 transcript:BGIOSGA002542-TA gene-biotype:protein-coding transcript-biotype:protein-coding	BGIOSGA002542-PA	897	897	T	GNKGRLFNEASASHNTPKVEREEGELSPNGD	121.13	121.13	LFNEASAS(0.004)HNT(0.996)PK	LFNEAS(-44.4)AS(-23.92)HNT(23.92)PK	11	2	-0.30953	5432500	9332300	6266300	8994000	2943400	3655400
BGIOSGA002547-PA	42.538	397	BGIOSGA002547-PA	233	pep chromosome:ASM465v1:1:470346:473434:-1 gene:BGIOSGA002547 transcript:BGIOSGA002547-TA gene-biotype:protein-coding transcript-biotype:protein-coding	BGIOSGA002547-PA	233	233	S	TNSWRASQQTNAYNTSPRSDFDSGRHPFMPV	197.06	109.1	ASQQTNAYNT(0.061)S(0.939)PR	AS(-91.67)QQT(-59.37)NAY(-70.63)NT(-11.9)S(11.9)PR	11	2	0.53229	40118000	36736000	35166000	29841000	18095000	22126000	57582000	32252000	24432000	30694000		21331000
BGIOSGA002550-PA	24.274	216	BGIOSGA002550-PA	198	pep chromosome:ASM465v1:1:410296:410946:-1 gene:BGIOSGA002550 transcript:BGIOSGA002550-TA gene-biotype:protein-coding transcript-biotype:protein-coding	BGIOSGA002550-PA	198	198	T	ATEKKRKKKRERADDTDNDKEQVEHTRKKPR	100.97	100.97	ADDT(1)DNDKEQVEHTR	ADDT(79.61)DNDKEQVEHT(-79.61)R	4	3	-0.78605						13778000	7552400			27726000	14394000	22344000
BGIOSGA002576-PA	58.271	539	BGIOSGA002576-PA	93	pep chromosome:ASM465v1:1:62531:67795:1 gene:BGIOSGA002576 transcript:BGIOSGA002576-TA gene-biotype:protein-coding transcript-biotype:protein-coding	BGIOSGA002576-PA	93	93	T	EKRKVVDQLQSGGTSTKSTLRTELPTVGLSN	92.457	57.425	VVDQLQS(0.019)GGT(0.212)S(0.287)T(0.482)K	VVDQLQS(-14.13)GGT(-3.56)S(-2.25)T(2.25)K	12	2	-1.9302
BGIOSGA002576-PA	58.271	539	BGIOSGA002576-PA	92	pep chromosome:ASM465v1:1:62531:67795:1 gene:BGIOSGA002576 transcript:BGIOSGA002576-TA gene-biotype:protein-coding transcript-biotype:protein-coding	BGIOSGA002576-PA	92	92	S	AEKRKVVDQLQSGGTSTKSTLRTELPTVGLS	106.76	106.76	VVDQLQS(0.061)GGT(0.133)S(0.614)T(0.192)K	VVDQLQS(-10.02)GGT(-6.64)S(5.03)T(-5.03)K	11	2	-0.45295												94282000
BGIOSGA002576-PA	58.271	539	BGIOSGA002576-PA	88	pep chromosome:ASM465v1:1:62531:67795:1 gene:BGIOSGA002576 transcript:BGIOSGA002576-TA gene-biotype:protein-coding transcript-biotype:protein-coding	BGIOSGA002576-PA	88	88	S	AYINAEKRKVVDQLQSGGTSTKSTLRTELPT	51.135	51.135	VVDQLQS(0.562)GGT(0.146)S(0.146)T(0.146)K	VVDQLQS(5.85)GGT(-5.85)S(-5.85)T(-5.85)K	7	2	-0.18407
BGIOSGA002576-PA	58.271	539	BGIOSGA002576-PA	91	pep chromosome:ASM465v1:1:62531:67795:1 gene:BGIOSGA002576 transcript:BGIOSGA002576-TA gene-biotype:protein-coding transcript-biotype:protein-coding	BGIOSGA002576-PA	91	91	T	NAEKRKVVDQLQSGGTSTKSTLRTELPTVGL	92.457	67.136	VVDQLQS(0.011)GGT(0.467)S(0.211)T(0.311)K	VVDQLQS(-16.24)GGT(1.76)S(-3.45)T(-1.76)K	10	2	-0.83207
BGIOSGA002581-PA	100.24	920	BGIOSGA002581-PA	573	pep chromosome:ASM465v1:1:98744:102775:1 gene:BGIOSGA002581 transcript:BGIOSGA002581-TA gene-biotype:protein-coding transcript-biotype:protein-coding	BGIOSGA002581-PA	573	573	S	RSDSRSPKRHREESLSPSKSRRSARAGSRSP	85.672	83.455	HREES(0.003)LS(0.996)PS(0.001)K	HREES(-25.06)LS(25.06)PS(-31.5)K	7	2	-1.6288		16794000	29512000	12510000	13005000	12942000	45737000	7914000	4869300	63100000	11441000	50963000
BGIOSGA002581-PA	100.24	920	BGIOSGA002581-PA	673	pep chromosome:ASM465v1:1:98744:102775:1 gene:BGIOSGA002581 transcript:BGIOSGA002581-TA gene-biotype:protein-coding transcript-biotype:protein-coding	BGIOSGA002581-PA	673	673	S	DKKLDVSSVAHKRSSSASEDEMLNSNSKRSK	104.41	97.223	S(0.008)S(0.008)S(0.984)ASEDEMLNSNSK	S(-21.07)S(-21.07)S(21.07)AS(-33.47)EDEMLNS(-82.46)NS(-89.11)K	3	2	0.65278	8961100	9761800	33834000		7692700	8145700
BGIOSGA002581-PA	100.24	920	BGIOSGA002581-PA	483	pep chromosome:ASM465v1:1:98744:102775:1 gene:BGIOSGA002581 transcript:BGIOSGA002581-TA gene-biotype:protein-coding transcript-biotype:protein-coding	BGIOSGA002581-PA	483	483	S	KSRSRSPIKYRRSRRSRSYSPPVRHTRGRRS	52.071	52.071	S(0.999)RS(0.981)Y(0.176)S(0.844)PPVR	S(29.29)RS(16.3)Y(-7.22)S(7.22)PPVR	1	2	-0.54188			15015000		6201900	4427600
BGIOSGA002581-PA	100.24	920	BGIOSGA002581-PA	675	pep chromosome:ASM465v1:1:98744:102775:1 gene:BGIOSGA002581 transcript:BGIOSGA002581-TA gene-biotype:protein-coding transcript-biotype:protein-coding	BGIOSGA002581-PA	675	675	S	KLDVSSVAHKRSSSASEDEMLNSNSKRSKHD	183	96.414	S(0.286)S(0.358)S(0.358)AS(0.998)EDEMLNSNSK	S(-0.99)S(0)S(0)AS(26.96)EDEMLNS(-59.82)NS(-69.94)K	5	2	0.053301	24022000	24440000	42770000	8597100	9188000	16445000
BGIOSGA002581-PA	100.24	920	BGIOSGA002581-PA	597	pep chromosome:ASM465v1:1:98744:102775:1 gene:BGIOSGA002581 transcript:BGIOSGA002581-TA gene-biotype:protein-coding transcript-biotype:protein-coding	BGIOSGA002581-PA	597	597	S	RAGSRSPGQHKGSKLSPTRDHHSSRRSRRSR	69.276	69.276	GSKLS(0.953)PT(0.047)R	GS(-32.88)KLS(13.07)PT(-13.07)R	5	2	-0.29413	79391000	49404000	54791000		33716000	20533000	51295000	17696000	29238000	53053000	29254000	42893000
BGIOSGA002581-PA	100.24	920	BGIOSGA002581-PA	487	pep chromosome:ASM465v1:1:98744:102775:1 gene:BGIOSGA002581 transcript:BGIOSGA002581-TA gene-biotype:protein-coding transcript-biotype:protein-coding	BGIOSGA002581-PA	487	487	S	RSPIKYRRSRRSRSYSPPVRHTRGRRSRSPS	127.56	127.56	SYS(1)PPVR	S(-72.78)Y(-74.93)S(72.78)PPVR	3	2	0.14274	51946000	61832000	91241000	9521700	37848000	40168000	16515000	13016000	5003200	43826000	9161500	35286000
BGIOSGA002581-PA	100.24	920	BGIOSGA002581-PA	56	pep chromosome:ASM465v1:1:98744:102775:1 gene:BGIOSGA002581 transcript:BGIOSGA002581-TA gene-biotype:protein-coding transcript-biotype:protein-coding	BGIOSGA002581-PA	56	56	S	SAADDPDQDDDLHRPSSPAQASRDAYSDADD	263.16	249.22	ALSASAADDPDQDDDLHRPS(0.733)S(0.244)PAQAS(0.023)R	ALS(-178.51)AS(-138.18)AADDPDQDDDLHRPS(4.78)S(-4.78)PAQAS(-14.97)R	20	3	0.16056		423050000	480400000		10910000		136150000
BGIOSGA002581-PA	100.24	920	BGIOSGA002581-PA	672	pep chromosome:ASM465v1:1:98744:102775:1 gene:BGIOSGA002581 transcript:BGIOSGA002581-TA gene-biotype:protein-coding transcript-biotype:protein-coding	BGIOSGA002581-PA	672	672	S	EDKKLDVSSVAHKRSSSASEDEMLNSNSKRS	96.414	50.831	RS(0.134)S(0.718)S(0.374)AS(0.774)EDEMLNSNSK	RS(-7.62)S(5.21)S(-4.58)AS(4.58)EDEMLNS(-36.57)NS(-44.87)K	3	2	-1.2376	9370800	8354000	16635000	2829400		4842500
BGIOSGA002581-PA	100.24	920	BGIOSGA002581-PA	538	pep chromosome:ASM465v1:1:98744:102775:1 gene:BGIOSGA002581 transcript:BGIOSGA002581-TA gene-biotype:protein-coding transcript-biotype:protein-coding	BGIOSGA002581-PA	538	538	S	GRSGRRESDRSRDHYSSSSRRNRSRSISPRH	66.683	55.649	DHY(0.031)S(0.75)S(0.154)S(0.049)S(0.016)R	DHY(-13.81)S(6.86)S(-6.86)S(-11.83)S(-16.81)R	4	2	1.3207								2800100		17946000	8651900	13470000
BGIOSGA002581-PA	100.24	920	BGIOSGA002581-PA	828	pep chromosome:ASM465v1:1:98744:102775:1 gene:BGIOSGA002581 transcript:BGIOSGA002581-TA gene-biotype:protein-coding transcript-biotype:protein-coding	BGIOSGA002581-PA	828	828	S	DDTLSSDRRKVQSEDSPRRKHNQLAASSDVH	165.78	120.45	VQSEDS(1)PR	VQS(-50.2)EDS(50.2)PR	6	2	-0.10274	5366900						21254000	16662000	21818000	51753000	32223000	38800000
BGIOSGA002581-PA	100.24	920	BGIOSGA002581-PA	571	pep chromosome:ASM465v1:1:98744:102775:1 gene:BGIOSGA002581 transcript:BGIOSGA002581-TA gene-biotype:protein-coding transcript-biotype:protein-coding	BGIOSGA002581-PA	571	571	S	SSRSDSRSPKRHREESLSPSKSRRSARAGSR	85.672	85.672	HREES(1)LS(0.541)PS(0.459)K	HREES(30.99)LS(0.72)PS(-0.72)K	5	2	-0.38753		16794000	13246000	12510000	5016300	39835000	39795000	3629200	2484600	45868000	10619000	25811000
BGIOSGA002581-PA	100.24	920	BGIOSGA002581-PA	485	pep chromosome:ASM465v1:1:98744:102775:1 gene:BGIOSGA002581 transcript:BGIOSGA002581-TA gene-biotype:protein-coding transcript-biotype:protein-coding	BGIOSGA002581-PA	485	485	S	RSRSPIKYRRSRRSRSYSPPVRHTRGRRSRS	92.112	52.071	S(0.999)RS(0.981)Y(0.176)S(0.844)PPVR	S(29.29)RS(16.3)Y(-7.22)S(7.22)PPVR	3	2	-0.54188	25089000	28887000	46478000	3047100	18952000	18609000	16515000	5558400	5003200	19411000	9161500	13211000
BGIOSGA002581-PA	100.24	920	BGIOSGA002581-PA	575	pep chromosome:ASM465v1:1:98744:102775:1 gene:BGIOSGA002581 transcript:BGIOSGA002581-TA gene-biotype:protein-coding transcript-biotype:protein-coding	BGIOSGA002581-PA	575	575	S	DSRSPKRHREESLSPSKSRRSARAGSRSPGQ	74.537	74.537	HREES(0.839)LS(0.457)PS(0.705)K	HREES(5.28)LS(-2.65)PS(2.65)K	9	2	0.023166						39835000
BGIOSGA002581-PA	100.24	920	BGIOSGA002581-PA	67	pep chromosome:ASM465v1:1:98744:102775:1 gene:BGIOSGA002581 transcript:BGIOSGA002581-TA gene-biotype:protein-coding transcript-biotype:protein-coding	BGIOSGA002581-PA	67	67	S	LHRPSSPAQASRDAYSDADDDDDDRPHAPPG	213.9	198.14	DAYS(1)DADDDDDDRPHAPPGPVDPSK	DAY(-98.52)S(98.52)DADDDDDDRPHAPPGPVDPS(-175.48)K	4	3	-0.64331	119980000	206400000	177420000	86453000	89978000	76536000	91620000	46224000	66987000	98970000	57938000	67504000
BGIOSGA002581-PA	100.24	920	BGIOSGA002581-PA	57	pep chromosome:ASM465v1:1:98744:102775:1 gene:BGIOSGA002581 transcript:BGIOSGA002581-TA gene-biotype:protein-coding transcript-biotype:protein-coding	BGIOSGA002581-PA	57	57	S	AADDPDQDDDLHRPSSPAQASRDAYSDADDD	220.63	220.63	ALSASAADDPDQDDDLHRPS(0.358)S(0.62)PAQAS(0.022)R	ALS(-136.99)AS(-108.06)AADDPDQDDDLHRPS(-2.38)S(2.38)PAQAS(-14.48)R	21	3	-0.104	330050000
BGIOSGA002588-PA	150.17	1355	BGIOSGA002588-PA	304	pep chromosome:ASM465v1:1:161285:169352:1 gene:BGIOSGA002588 transcript:BGIOSGA002588-TA gene-biotype:protein-coding transcript-biotype:protein-coding	BGIOSGA002588-PA	304	304	S	KAQIQKEILQSHPSPSASNRKDKMLAMLVQD	64.82	64.82	EILQS(0.011)HPS(0.484)PS(0.484)AS(0.021)NR	EILQS(-16.29)HPS(0)PS(0)AS(-13.54)NR	10	2	-0.56964
BGIOSGA002588-PA	150.17	1355	BGIOSGA002588-PA	459	pep chromosome:ASM465v1:1:161285:169352:1 gene:BGIOSGA002588 transcript:BGIOSGA002588-TA gene-biotype:protein-coding transcript-biotype:protein-coding	BGIOSGA002588-PA	459	459	S	AAPFQRLGKPLKRPVSPSSDEQEKKRPRNKT	80.905	80.905	RPVS(0.877)PS(0.061)S(0.061)DEQEK	RPVS(11.55)PS(-11.55)S(-11.55)DEQEK	4	2	-0.47058
BGIOSGA002588-PA	150.17	1355	BGIOSGA002588-PA	302	pep chromosome:ASM465v1:1:161285:169352:1 gene:BGIOSGA002588 transcript:BGIOSGA002588-TA gene-biotype:protein-coding transcript-biotype:protein-coding	BGIOSGA002588-PA	302	302	S	KAKAQIQKEILQSHPSPSASNRKDKMLAMLV	64.82	51.546	EILQS(0.012)HPS(0.817)PS(0.16)AS(0.011)NR	EILQS(-18.32)HPS(7.09)PS(-7.09)AS(-18.81)NR	8	2	0.055868											4042700	6265100
BGIOSGA002597-PA	35.712	320	BGIOSGA002597-PA	146	pep chromosome:ASM465v1:1:282794:283821:1 gene:BGIOSGA002597 transcript:BGIOSGA002597-TA gene-biotype:protein-coding transcript-biotype:protein-coding	BGIOSGA002597-PA	146	146	S	DKTNWVMHEYRLADASPPPPPSSAEPPRQDD	60.549	60.549	LADAS(1)PPPPPSSAEPPR	LADAS(47.57)PPPPPS(-47.57)S(-47.57)AEPPR	5	2	-0.97285				8018700	3707700					6815400	1690900
BGIOSGA002598-PA	70.242	620	BGIOSGA002598-PA	140	pep chromosome:ASM465v1:1:300744:307164:1 gene:BGIOSGA002598 transcript:BGIOSGA002598-TA gene-biotype:protein-coding transcript-biotype:protein-coding	BGIOSGA002598-PA	140	140	S	SWGRGKNAYYDAGEQSGDDEDDYEETRRIQK	89.829	89.829	NAYYDAGEQS(1)GDDEDDYEETRR	NAY(-59.18)Y(-42.33)DAGEQS(42.33)GDDEDDY(-68.59)EET(-45.93)RR	10	3	-1.3201
BGIOSGA002598-PA	70.242	620	BGIOSGA002598-PA	112	pep chromosome:ASM465v1:1:300744:307164:1 gene:BGIOSGA002598 transcript:BGIOSGA002598-TA gene-biotype:protein-coding transcript-biotype:protein-coding	BGIOSGA002598-PA	112	112	S	KRAERAVKQIAGGDDSMDEHEDDHKDKNSWG	162.44	112	QIAGGDDS(1)MDEHEDDHKDK	QIAGGDDS(112)MDEHEDDHKDK	8	3	0.18557		16354000	55203000		16575000	26238000	5150200			12790000	12468000	10865000
BGIOSGA002598-PA	70.242	620	BGIOSGA002598-PA	173	pep chromosome:ASM465v1:1:300744:307164:1 gene:BGIOSGA002598 transcript:BGIOSGA002598-TA gene-biotype:protein-coding transcript-biotype:protein-coding	BGIOSGA002598-PA	173	173	S	ESKLSMQDFGLEDGESDEEDRAIKASNHQVK	200.99	131.67	LSMQDFGLEDGES(1)DEEDR	LS(-104.39)MQDFGLEDGES(104.39)DEEDR	13	2	-0.18753	39437000	77736000	53831000	46267000
BGIOSGA002603-PA	308.81	2732	BGIOSGA002603-PA	1552	pep chromosome:ASM465v1:1:414484:449122:1 gene:BGIOSGA002603 transcript:BGIOSGA002603-TA gene-biotype:protein-coding transcript-biotype:protein-coding	BGIOSGA002603-PA	1552	1552	S	IAGNLDSNAGICRLISSMVEEKIFCDSNHLM	51.268	51.268	LIS(1)S(1)MVEEK	LIS(51.27)S(51.27)MVEEK	3	2	1.9721		11700000	2610600		14952000
BGIOSGA002603-PA	308.81	2732	BGIOSGA002603-PA	1553	pep chromosome:ASM465v1:1:414484:449122:1 gene:BGIOSGA002603 transcript:BGIOSGA002603-TA gene-biotype:protein-coding transcript-biotype:protein-coding	BGIOSGA002603-PA	1553	1553	S	AGNLDSNAGICRLISSMVEEKIFCDSNHLMK	51.268	51.268	LIS(1)S(1)MVEEK	LIS(51.27)S(51.27)MVEEK	4	2	1.9721		11700000	2610600		14952000
BGIOSGA002614-PA	85.337	767	BGIOSGA002614-PA	485	pep chromosome:ASM465v1:1:531261:539609:1 gene:BGIOSGA002614 transcript:BGIOSGA002614-TA gene-biotype:protein-coding transcript-biotype:protein-coding	BGIOSGA002614-PA	485	485	S	FEPENQNPPFKRLSRSDVSDASEGAEVQHAR	69.451	69.451	S(0.499)DVS(0.499)DAS(0.002)EGAEVQHAR	S(0)DVS(0)DAS(-23.57)EGAEVQHAR	1	2	-1.1877
BGIOSGA002614-PA	85.337	767	BGIOSGA002614-PA	170	pep chromosome:ASM465v1:1:531261:539609:1 gene:BGIOSGA002614 transcript:BGIOSGA002614-TA gene-biotype:protein-coding transcript-biotype:protein-coding	BGIOSGA002614-PA	170	170	S	LDSAAVSQFSTPSSHSLSPTRHRKEGEHDPR	93.815	93.815	SSGEQPALDSAAVSQFST(0.002)PS(0.013)S(0.022)HS(0.388)LS(0.388)PT(0.188)R	S(-85.85)S(-85.85)GEQPALDS(-63.36)AAVS(-47.21)QFS(-32.84)T(-24.09)PS(-14.75)S(-12.43)HS(0)LS(0)PT(-3.14)R	23	3	-0.23943
BGIOSGA002614-PA	85.337	767	BGIOSGA002614-PA	101	pep chromosome:ASM465v1:1:531261:539609:1 gene:BGIOSGA002614 transcript:BGIOSGA002614-TA gene-biotype:protein-coding transcript-biotype:protein-coding	BGIOSGA002614-PA	101	101	S	QDRRSFVATKMDASRSPASAASSDNFRTPSA	109	97.463	S(1)PASAASSDNFR	S(44.43)PAS(-44.43)AAS(-80.03)S(-87.23)DNFR	1	2	-0.27756	33854000	33994000	32001000	37812000	19182000	22572000		7877000		17406000	9956500	16200000
BGIOSGA002614-PA	85.337	767	BGIOSGA002614-PA	488	pep chromosome:ASM465v1:1:531261:539609:1 gene:BGIOSGA002614 transcript:BGIOSGA002614-TA gene-biotype:protein-coding transcript-biotype:protein-coding	BGIOSGA002614-PA	488	488	S	ENQNPPFKRLSRSDVSDASEGAEVQHAREHS	141.34	130.72	S(0.005)DVS(0.995)DASEGAEVQHAR	S(-23.11)DVS(23.11)DAS(-65.55)EGAEVQHAR	4	2	0.023626	3592200	10232000					13165000	6516800	5966600	8192700
BGIOSGA002614-PA	85.337	767	BGIOSGA002614-PA	172	pep chromosome:ASM465v1:1:531261:539609:1 gene:BGIOSGA002614 transcript:BGIOSGA002614-TA gene-biotype:protein-coding transcript-biotype:protein-coding	BGIOSGA002614-PA	172	172	S	SAAVSQFSTPSSHSLSPTRHRKEGEHDPRLN	93.815	93.815	SSGEQPALDSAAVSQFST(0.002)PS(0.013)S(0.022)HS(0.388)LS(0.388)PT(0.188)R	S(-85.85)S(-85.85)GEQPALDS(-63.36)AAVS(-47.21)QFS(-32.84)T(-24.09)PS(-14.75)S(-12.43)HS(0)LS(0)PT(-3.14)R	25	3	-0.23943
BGIOSGA002654-PA	186.64	1680	BGIOSGA002654-PA	546	pep chromosome:ASM465v1:1:1088223:1101818:1 gene:BGIOSGA002654 transcript:BGIOSGA002654-TA gene-biotype:protein-coding transcript-biotype:protein-coding	BGIOSGA002654-PA	546	546	S	APEWRADGRSLSPPPSPPRPPRRATPPPPRQ	103.14	40.085	S(1)LS(1)PPPS(1)PPRPPR	S(40.08)LS(40.08)PPPS(40.08)PPRPPR	7	3	-0.7783	22708000	27139000	26590000	22823000	24115000	4510500	15408000	5326800	5758100	7567700	9603100	18085000
BGIOSGA002654-PA	186.64	1680	BGIOSGA002654-PA	540	pep chromosome:ASM465v1:1:1088223:1101818:1 gene:BGIOSGA002654 transcript:BGIOSGA002654-TA gene-biotype:protein-coding transcript-biotype:protein-coding	BGIOSGA002654-PA	540	540	S	QAQPVRAPEWRADGRSLSPPPSPPRPPRRAT	91.076	40.085	S(1)LS(1)PPPS(1)PPRPPR	S(40.08)LS(40.08)PPPS(40.08)PPRPPR	1	3	-0.7783	21198000	4855100	26590000				15408000
BGIOSGA002654-PA	186.64	1680	BGIOSGA002654-PA	542	pep chromosome:ASM465v1:1:1088223:1101818:1 gene:BGIOSGA002654 transcript:BGIOSGA002654-TA gene-biotype:protein-coding transcript-biotype:protein-coding	BGIOSGA002654-PA	542	542	S	QPVRAPEWRADGRSLSPPPSPPRPPRRATPP	103.14	40.085	S(1)LS(1)PPPS(1)PPRPPR	S(40.08)LS(40.08)PPPS(40.08)PPRPPR	3	3	-0.7783	21002000	28131000	38111000	6959100	18454000	25373000	7147900	9377700	7546100	18390000	15627000	23387000
BGIOSGA002654-PA	186.64	1680	BGIOSGA002654-PA	468	pep chromosome:ASM465v1:1:1088223:1101818:1 gene:BGIOSGA002654 transcript:BGIOSGA002654-TA gene-biotype:protein-coding transcript-biotype:protein-coding	BGIOSGA002654-PA	468	468	S	LIMPSPLFLSRNPNPSPPRSATATGTTILSP	62.463	62.463	NPNPS(1)PPR	NPNPS(62.46)PPR	5	2	3.1622								755930		11669000	6261400
BGIOSGA002654-PA	186.64	1680	BGIOSGA002654-PA	555	pep chromosome:ASM465v1:1:1088223:1101818:1 gene:BGIOSGA002654 transcript:BGIOSGA002654-TA gene-biotype:protein-coding transcript-biotype:protein-coding	BGIOSGA002654-PA	555	555	T	SLSPPPSPPRPPRRATPPPPRQPPPQPEPFR	92.445	76.85	RAT(1)PPPPR	RAT(76.85)PPPPR	3	2	-0.03968	34891000	44153000	42728000	27280000	25896000	22069000	17600000	15600000	14185000	45195000	31017000	57350000
BGIOSGA002656-PA	151.65	1343	BGIOSGA002656-PA	318	pep chromosome:ASM465v1:1:1142083:1146114:1 gene:BGIOSGA002656 transcript:BGIOSGA002656-TA gene-biotype:protein-coding transcript-biotype:protein-coding	BGIOSGA002656-PA	318	318	S	KQKQEEGGKDDKAMGSDDDDDNLQSQASDEK	60.401	60.401	AMGS(1)DDDDDNLQSQASDEK	AMGS(34.75)DDDDDNLQS(-34.75)QAS(-51.35)DEK	4	2	1.1435
BGIOSGA002684-PA	116.35	1056	BGIOSGA002684-PA	381	pep chromosome:ASM465v1:1:1737670:1741867:1 gene:BGIOSGA002684 transcript:BGIOSGA002684-TA gene-biotype:protein-coding transcript-biotype:protein-coding	BGIOSGA002684-PA	381	381	S	KTDMDENPGRMDGDSSADGSNMVYEDNTCLA	55.213	55.213	MDGDS(0.499)S(0.499)ADGS(0.002)NMVYEDNTCLAK	MDGDS(0)S(0)ADGS(-24.67)NMVY(-37.99)EDNT(-55.21)CLAK	6	2	-0.72136
BGIOSGA002684-PA	116.35	1056	BGIOSGA002684-PA	380	pep chromosome:ASM465v1:1:1737670:1741867:1 gene:BGIOSGA002684 transcript:BGIOSGA002684-TA gene-biotype:protein-coding transcript-biotype:protein-coding	BGIOSGA002684-PA	380	380	S	QKTDMDENPGRMDGDSSADGSNMVYEDNTCL	55.213	55.213	MDGDS(0.499)S(0.499)ADGS(0.002)NMVYEDNTCLAK	MDGDS(0)S(0)ADGS(-24.67)NMVY(-37.99)EDNT(-55.21)CLAK	5	2	-0.72136
BGIOSGA002684-PA	116.35	1056	BGIOSGA002684-PA	105	pep chromosome:ASM465v1:1:1737670:1741867:1 gene:BGIOSGA002684 transcript:BGIOSGA002684-TA gene-biotype:protein-coding transcript-biotype:protein-coding	BGIOSGA002684-PA	105	105	S	DGDNVSNGVDVDSQSSLPDNKVRVLWIDGVE	55.765	55.765	TENGGADGDNVS(0.203)NGVDVDS(0.487)QS(0.557)S(0.753)LPDNK	T(-42.95)ENGGADGDNVS(-7.48)NGVDVDS(-0.9)QS(0.9)S(5.3)LPDNK	22	3	-0.22344
BGIOSGA002684-PA	116.35	1056	BGIOSGA002684-PA	727	pep chromosome:ASM465v1:1:1737670:1741867:1 gene:BGIOSGA002684 transcript:BGIOSGA002684-TA gene-biotype:protein-coding transcript-biotype:protein-coding	BGIOSGA002684-PA	727	727	S	TGPLSVAFGFVTRLASELFARGKKHLDGSNS	133.32	133.32	LAS(1)ELFAR	LAS(133.32)ELFAR	3	2	-0.06665
BGIOSGA002684-PA	116.35	1056	BGIOSGA002684-PA	104	pep chromosome:ASM465v1:1:1737670:1741867:1 gene:BGIOSGA002684 transcript:BGIOSGA002684-TA gene-biotype:protein-coding transcript-biotype:protein-coding	BGIOSGA002684-PA	104	104	S	ADGDNVSNGVDVDSQSSLPDNKVRVLWIDGV	55.765	55.765	TENGGADGDNVS(0.203)NGVDVDS(0.487)QS(0.557)S(0.753)LPDNK	T(-42.95)ENGGADGDNVS(-7.48)NGVDVDS(-0.9)QS(0.9)S(5.3)LPDNK	21	3	-0.22344
BGIOSGA002700-PA	91.426	822	BGIOSGA002700-PA	733	pep chromosome:ASM465v1:1:1901436:1907653:1 gene:BGIOSGA002700 transcript:BGIOSGA002700-TA gene-biotype:protein-coding transcript-biotype:protein-coding	BGIOSGA002700-PA	733	733	S	HVKITRKVPHLEKKTSFQTDASSLGKGHKIS	64.565	64.565	KT(0.132)S(0.841)FQT(0.024)DAS(0.002)SLGK	KT(-8.05)S(8.05)FQT(-15.38)DAS(-26.23)S(-33.7)LGK	3	2	-0.22115							20506000		6942100	17670000	14287000	18579000
BGIOSGA002724-PA	72.712	662	BGIOSGA002724-PA	629	pep chromosome:ASM465v1:1:2338246:2340371:1 gene:BGIOSGA002724 transcript:BGIOSGA002724-TA gene-biotype:protein-coding transcript-biotype:protein-coding	BGIOSGA002724-PA	629	629	S	RPSMSRVIEMLERSISELEMPPKPFLCSPIH	56.359	56.359	SIS(1)ELEMPPK	S(-36.15)IS(36.15)ELEMPPK	3	2	2.7892		38430000	38911000		19362000	27419000						25011000
BGIOSGA002754-PA	62.842	600	BGIOSGA002754-PA	411	pep chromosome:ASM465v1:1:2666105:2670037:1 gene:BGIOSGA002754 transcript:BGIOSGA002754-TA gene-biotype:protein-coding transcript-biotype:protein-coding	BGIOSGA002754-PA	411	411	S	SATRGRPGAPSSRSSSVEPGPAARPRRQSCS	87.184	87.184	S(0.131)S(0.131)S(0.739)VEPGPAAR	S(-7.53)S(-7.53)S(7.53)VEPGPAAR	3	2	0.39793									1903800	8687000	3602500	7292800
BGIOSGA002754-PA	62.842	600	BGIOSGA002754-PA	436	pep chromosome:ASM465v1:1:2666105:2670037:1 gene:BGIOSGA002754 transcript:BGIOSGA002754-TA gene-biotype:protein-coding transcript-biotype:protein-coding	BGIOSGA002754-PA	436	436	S	RRQSCSPSRGRTLNGSVPSGSSVPAVRRSHL	51.009	51.009	T(0.004)LNGS(0.743)VPS(0.105)GS(0.074)S(0.074)VPAVR	T(-23.24)LNGS(8.49)VPS(-8.49)GS(-10.03)S(-10.03)VPAVR	5	2	-1.2373										5529400
BGIOSGA002754-PA	62.842	600	BGIOSGA002754-PA	171	pep chromosome:ASM465v1:1:2666105:2670037:1 gene:BGIOSGA002754 transcript:BGIOSGA002754-TA gene-biotype:protein-coding transcript-biotype:protein-coding	BGIOSGA002754-PA	171	171	T	NHPDPPSRTTLPLRATSSNNLNSAATTRRPS	75.819	75.819	AT(0.526)S(0.398)S(0.075)NNLNSAATTR	AT(1.21)S(-1.21)S(-8.43)NNLNS(-58.42)AAT(-69.38)T(-69.09)R	2	2	-0.058789							4556700					6654200
BGIOSGA002754-PA	62.842	600	BGIOSGA002754-PA	172	pep chromosome:ASM465v1:1:2666105:2670037:1 gene:BGIOSGA002754 transcript:BGIOSGA002754-TA gene-biotype:protein-coding transcript-biotype:protein-coding	BGIOSGA002754-PA	172	172	S	HPDPPSRTTLPLRATSSNNLNSAATTRRPSS	73.156	73.156	AT(0.108)S(0.787)S(0.105)NNLNSAATTR	AT(-8.61)S(8.61)S(-8.76)NNLNS(-48.6)AAT(-63.87)T(-64.98)R	3	2	-0.24824								1030300			4710400
BGIOSGA002754-PA	62.842	600	BGIOSGA002754-PA	498	pep chromosome:ASM465v1:1:2666105:2670037:1 gene:BGIOSGA002754 transcript:BGIOSGA002754-TA gene-biotype:protein-coding transcript-biotype:protein-coding	BGIOSGA002754-PA	498	498	S	DQRSSLNGLSGKSSNSPDSSGFGRTLSKKSL	82.069	82.069	SSNS(0.999)PDSSGFGR	S(-45.12)S(-45.12)NS(34.36)PDS(-34.36)S(-40.83)GFGR	4	2	-0.11245	11028000	13751000	11572000		12350000	12447000				29198000	14885000	19380000
BGIOSGA002754-PA	62.842	600	BGIOSGA002754-PA	173	pep chromosome:ASM465v1:1:2666105:2670037:1 gene:BGIOSGA002754 transcript:BGIOSGA002754-TA gene-biotype:protein-coding transcript-biotype:protein-coding	BGIOSGA002754-PA	173	173	S	PDPPSRTTLPLRATSSNNLNSAATTRRPSSS	59.198	59.198	AT(0.333)S(0.333)S(0.333)NNLNSAATTR	AT(0)S(0)S(0)NNLNS(-33.08)AAT(-49.66)T(-53.3)R	4	2	0.45519
BGIOSGA002774-PA	59.446	536	BGIOSGA002774-PA	232	pep chromosome:ASM465v1:1:2973115:2977020:1 gene:BGIOSGA002774 transcript:BGIOSGA002774-TA gene-biotype:protein-coding transcript-biotype:protein-coding	BGIOSGA002774-PA	232	232	S	GVDPADRYGSDNDGHSPRHYPQAEEGEEDDE	135.91	133.13	YGSDNDGHS(1)PR	Y(-123.35)GS(-69.92)DNDGHS(69.92)PR	9	2	-0.19166	29352000	43985000	94153000	90959000	57991000	45152000	19780000	16382000	29434000	98712000	62064000	77550000
BGIOSGA002774-PA	59.446	536	BGIOSGA002774-PA	226	pep chromosome:ASM465v1:1:2973115:2977020:1 gene:BGIOSGA002774 transcript:BGIOSGA002774-TA gene-biotype:protein-coding transcript-biotype:protein-coding	BGIOSGA002774-PA	226	226	S	NFIDDTGVDPADRYGSDNDGHSPRHYPQAEE	137.47	92.265	YGS(1)DNDGHS(1)PR	Y(-47.84)GS(47.84)DNDGHS(70.18)PR	3	2	-0.72376	10519000	20330000	31298000	65829000	28258000	45152000	19780000	16382000	15885000	34624000	30958000	28897000
BGIOSGA002774-PA	59.446	536	BGIOSGA002774-PA	47	pep chromosome:ASM465v1:1:2973115:2977020:1 gene:BGIOSGA002774 transcript:BGIOSGA002774-TA gene-biotype:protein-coding transcript-biotype:protein-coding	BGIOSGA002774-PA	47	47	S	DDLEDDLGDDWNRGRSPTPVHGDDGAGSSSK	152.13	137.94	GRS(1)PT(1)PVHGDDGAGSSSKPR	GRS(104.26)PT(93.6)PVHGDDGAGS(-93.6)S(-97.96)S(-98.43)KPR	3	3	0.060926	27788000	61559000	69200000	29006000	66166000	19200000	43325000	37334000	32836000	48528000	55323000	58259000
BGIOSGA002774-PA	59.446	536	BGIOSGA002774-PA	49	pep chromosome:ASM465v1:1:2973115:2977020:1 gene:BGIOSGA002774 transcript:BGIOSGA002774-TA gene-biotype:protein-coding transcript-biotype:protein-coding	BGIOSGA002774-PA	49	49	T	LEDDLGDDWNRGRSPTPVHGDDGAGSSSKPR	152.13	137.94	GRS(1)PT(1)PVHGDDGAGSSSKPR	GRS(104.26)PT(93.6)PVHGDDGAGS(-93.6)S(-97.96)S(-98.43)KPR	5	3	0.060926	27788000	45441000	45580000	29006000	56677000	19200000	31351000	31156000	25819000	48528000	41729000	58259000
BGIOSGA002774-PA	59.446	536	BGIOSGA002774-PA	23	pep chromosome:ASM465v1:1:2973115:2977020:1 gene:BGIOSGA002774 transcript:BGIOSGA002774-TA gene-biotype:protein-coding transcript-biotype:protein-coding	BGIOSGA002774-PA	23	23	S	EDGEPLMDPYDTRDPSPEPQQQPYDDLEDDL	90.464	90.464	DPS(1)PEPQQQPYDDLEDDLGDDWNR	DPS(40.87)PEPQQQPY(-40.87)DDLEDDLGDDWNR	3	2	0.71038
BGIOSGA002777-PA	217.36	1949	BGIOSGA002777-PA	516	pep chromosome:ASM465v1:1:3032269:3044087:1 gene:BGIOSGA002777 transcript:BGIOSGA002777-TA gene-biotype:protein-coding transcript-biotype:protein-coding	BGIOSGA002777-PA	516	516	S	IESSENQRLAKVGRVSQNSSVCNLGSKDSSS	52.247	52.247	VS(0.955)QNS(0.036)S(0.01)VCNLGSK	VS(14.25)QNS(-14.25)S(-19.99)VCNLGS(-47.53)K	2	2	-0.70813
BGIOSGA002829-PA	57.088	528	BGIOSGA002829-PA	7	pep chromosome:ASM465v1:1:3518216:3522742:1 gene:BGIOSGA002829 transcript:BGIOSGA002829-TA gene-biotype:protein-coding transcript-biotype:protein-coding description:Importin subunit alpha [Source:UniProtKB/TrEMBL;Acc:B8ADD2]	BGIOSGA002829-PA	7	7	S	---------MADDSGSPSPSSASPLQHHREA	70.994	70.994	ADDS(0.016)GS(0.917)PS(0.066)PS(0.001)SASPLQHHR	ADDS(-17.55)GS(11.45)PS(-11.45)PS(-29.5)S(-34.49)AS(-43.79)PLQHHR	6	3	0.041272		5390100			7088500			4426400	5685600	11649000
BGIOSGA002829-PA	57.088	528	BGIOSGA002829-PA	9	pep chromosome:ASM465v1:1:3518216:3522742:1 gene:BGIOSGA002829 transcript:BGIOSGA002829-TA gene-biotype:protein-coding transcript-biotype:protein-coding description:Importin subunit alpha [Source:UniProtKB/TrEMBL;Acc:B8ADD2]	BGIOSGA002829-PA	9	9	S	-------MADDSGSPSPSSASPLQHHREALK	58.373	52.898	ADDS(0.077)GS(0.069)PS(0.776)PS(0.056)S(0.018)AS(0.005)PLQHHR	ADDS(-10.04)GS(-10.51)PS(10.04)PS(-11.41)S(-16.39)AS(-22.31)PLQHHR	8	3	-0.6076		2433900			5772500	7266500		13361000		15448000	5088400	5502900
BGIOSGA002829-PA	57.088	528	BGIOSGA002829-PA	12	pep chromosome:ASM465v1:1:3518216:3522742:1 gene:BGIOSGA002829 transcript:BGIOSGA002829-TA gene-biotype:protein-coding transcript-biotype:protein-coding description:Importin subunit alpha [Source:UniProtKB/TrEMBL;Acc:B8ADD2]	BGIOSGA002829-PA	12	12	S	----MADDSGSPSPSSASPLQHHREALKSSV	123.32	123.32	ADDSGSPS(0.003)PS(0.22)S(0.55)AS(0.227)PLQHHR	ADDS(-73.27)GS(-45.75)PS(-23.36)PS(-3.98)S(3.85)AS(-3.85)PLQHHR	11	3	-0.065754		20819000			8840000		4289900		6428500	25927000
BGIOSGA002829-PA	57.088	528	BGIOSGA002829-PA	14	pep chromosome:ASM465v1:1:3518216:3522742:1 gene:BGIOSGA002829 transcript:BGIOSGA002829-TA gene-biotype:protein-coding transcript-biotype:protein-coding description:Importin subunit alpha [Source:UniProtKB/TrEMBL;Acc:B8ADD2]	BGIOSGA002829-PA	14	14	S	--MADDSGSPSPSSASPLQHHREALKSSVRN	75.956	75.956	ADDSGSPS(0.003)PS(0.014)S(0.038)AS(0.945)PLQHHR	ADDS(-58.93)GS(-43.22)PS(-25.08)PS(-18.19)S(-13.95)AS(13.95)PLQHHR	13	3	0.10991	12511000										15911000	19956000
BGIOSGA002829-PA	57.088	528	BGIOSGA002829-PA	11	pep chromosome:ASM465v1:1:3518216:3522742:1 gene:BGIOSGA002829 transcript:BGIOSGA002829-TA gene-biotype:protein-coding transcript-biotype:protein-coding description:Importin subunit alpha [Source:UniProtKB/TrEMBL;Acc:B8ADD2]	BGIOSGA002829-PA	11	11	S	-----MADDSGSPSPSSASPLQHHREALKSS	75.819	75.819	ADDSGS(0.001)PS(0.059)PS(0.313)S(0.313)AS(0.313)PLQHHR	ADDS(-33.78)GS(-24.53)PS(-7.28)PS(0)S(0)AS(0)PLQHHR	10	2	0.020365
BGIOSGA002883-PA	46.307	420	BGIOSGA002883-PA	11	pep chromosome:ASM465v1:1:4536255:4539562:1 gene:BGIOSGA002883 transcript:BGIOSGA002883-TA gene-biotype:protein-coding transcript-biotype:protein-coding	BGIOSGA002883-PA	11	11	S	-----MAAAAETPGSSASPHQERFLQSLSAR	49.5	42.568	AAAAET(0.029)PGS(0.295)S(0.338)AS(0.338)PHQER	AAAAET(-10.73)PGS(-0.6)S(0)AS(0)PHQER	10	2	-0.29276
BGIOSGA002883-PA	46.307	420	BGIOSGA002883-PA	13	pep chromosome:ASM465v1:1:4536255:4539562:1 gene:BGIOSGA002883 transcript:BGIOSGA002883-TA gene-biotype:protein-coding transcript-biotype:protein-coding	BGIOSGA002883-PA	13	13	S	---MAAAAETPGSSASPHQERFLQSLSARGW	49.5	42.568	AAAAET(0.029)PGS(0.295)S(0.338)AS(0.338)PHQER	AAAAET(-10.73)PGS(-0.6)S(0)AS(0)PHQER	12	2	-0.29276
BGIOSGA002883-PA	46.307	420	BGIOSGA002883-PA	10	pep chromosome:ASM465v1:1:4536255:4539562:1 gene:BGIOSGA002883 transcript:BGIOSGA002883-TA gene-biotype:protein-coding transcript-biotype:protein-coding	BGIOSGA002883-PA	10	10	S	------MAAAAETPGSSASPHQERFLQSLSA	55.885	55.885	AAAAET(0.092)PGS(0.401)S(0.292)AS(0.215)PHQER	AAAAET(-6.4)PGS(1.38)S(-1.38)AS(-2.72)PHQER	9	2	0.14572
BGIOSGA002889-PA	35.694	334	BGIOSGA002889-PA	266	pep chromosome:ASM465v1:1:4600979:4603222:1 gene:BGIOSGA002889 transcript:BGIOSGA002889-TA gene-biotype:protein-coding transcript-biotype:protein-coding	BGIOSGA002889-PA	266	266	T	KEAKESQEPADGTEETASAEPDEDTTSVDVK	82.413	79.837	ESQEPADGT(0.099)EET(0.45)AS(0.45)AEPDEDTTSVDVK	ES(-38.63)QEPADGT(-6.56)EET(0)AS(0)AEPDEDT(-31.62)T(-37.52)S(-43.24)VDVK	12	2	1.1179
BGIOSGA002889-PA	35.694	334	BGIOSGA002889-PA	268	pep chromosome:ASM465v1:1:4600979:4603222:1 gene:BGIOSGA002889 transcript:BGIOSGA002889-TA gene-biotype:protein-coding transcript-biotype:protein-coding	BGIOSGA002889-PA	268	268	S	AKESQEPADGTEETASAEPDEDTTSVDVKER	97.804	89.946	ES(0.001)QEPADGT(0.031)EET(0.036)AS(0.932)AEPDEDTTSVDVK	ES(-30.13)QEPADGT(-14.83)EET(-14.15)AS(14.15)AEPDEDT(-34.72)T(-40.84)S(-45.63)VDVK	14	2	0.60298	29411000		55008000		42035000
BGIOSGA002889-PA	35.694	334	BGIOSGA002889-PA	263	pep chromosome:ASM465v1:1:4600979:4603222:1 gene:BGIOSGA002889 transcript:BGIOSGA002889-TA gene-biotype:protein-coding transcript-biotype:protein-coding	BGIOSGA002889-PA	263	263	T	KKAKEAKESQEPADGTEETASAEPDEDTTSV	80.132	80.132	ES(0.001)QEPADGT(0.407)EET(0.296)AS(0.296)AEPDEDTTSVDVK	ES(-25.09)QEPADGT(1.38)EET(-1.38)AS(-1.38)AEPDEDT(-38.94)T(-44.24)S(-49.32)VDVK	9	3	-0.15668
BGIOSGA002890-PA	229.43	2080	BGIOSGA002890-PA	1769	pep chromosome:ASM465v1:1:4604605:4617559:1 gene:BGIOSGA002890 transcript:BGIOSGA002890-TA gene-biotype:protein-coding transcript-biotype:protein-coding	BGIOSGA002890-PA	1769	1769	S	DKGNGAVATRLSSNKSISVPAGFDQRTVSRD	93.345	93.345	S(0.997)IS(0.003)VPAGFDQR	S(25.96)IS(-25.96)VPAGFDQR	1	2	-0.15157	13131000			14669000	2367900	9885700			4122700
BGIOSGA002890-PA	229.43	2080	BGIOSGA002890-PA	1806	pep chromosome:ASM465v1:1:4604605:4617559:1 gene:BGIOSGA002890 transcript:BGIOSGA002890-TA gene-biotype:protein-coding transcript-biotype:protein-coding	BGIOSGA002890-PA	1806	1806	T	SLSTSPDGQQSETERTPEHGSFKPNIDARLN	72.766	72.766	DVSHFLGSLSTSPDGQQS(0.304)ET(0.304)ERT(0.366)PEHGS(0.025)FKPNIDAR	DVS(-60.09)HFLGS(-56.7)LS(-45.43)T(-40.53)S(-41.35)PDGQQS(-0.8)ET(-0.8)ERT(0.8)PEHGS(-11.57)FKPNIDAR	23	5	1.2089
BGIOSGA002890-PA	229.43	2080	BGIOSGA002890-PA	1801	pep chromosome:ASM465v1:1:4604605:4617559:1 gene:BGIOSGA002890 transcript:BGIOSGA002890-TA gene-biotype:protein-coding transcript-biotype:protein-coding	BGIOSGA002890-PA	1801	1801	S	SHFLGSLSTSPDGQQSETERTPEHGSFKPNI	114.05	114.05	DVSHFLGSLSTS(0.001)PDGQQS(0.898)ET(0.101)ER	DVS(-82.29)HFLGS(-57.58)LS(-44.07)T(-44.93)S(-32.16)PDGQQS(9.5)ET(-9.5)ER	18	3	0.1289	63704000	53613000	44666000	48778000
BGIOSGA002891-PA	121.16	1078	BGIOSGA002891-PA	18	pep chromosome:ASM465v1:1:4621936:4627043:1 gene:BGIOSGA002891 transcript:BGIOSGA002891-TA gene-biotype:protein-coding transcript-biotype:protein-coding	BGIOSGA002891-PA	18	18	S	DQKQSMLCSDDRPGGSPANAGEEIPEDRTTL	64.726	64.726	QSMLCS(0.219)DDRPGGS(0.781)PANAGEEIPEDR	QS(-40.45)MLCS(-5.52)DDRPGGS(5.52)PANAGEEIPEDR	13	3	0.36283		14627000	15003000	10897000	7172000						6482600
BGIOSGA002892-PA	89.801	813	BGIOSGA002892-PA	76	pep chromosome:ASM465v1:1:4720325:4725032:1 gene:BGIOSGA002892 transcript:BGIOSGA002892-TA gene-biotype:protein-coding transcript-biotype:protein-coding	BGIOSGA002892-PA	76	76	S	KNSVSQIKRLLGRKYSDPELQRDIAAFPFRV	82.954	74.094	KYS(1)DPELQR	KY(-44.25)S(44.25)DPELQR	3	2	-0.1524					10014000
BGIOSGA002892-PA	89.801	813	BGIOSGA002892-PA	495	pep chromosome:ASM465v1:1:4720325:4725032:1 gene:BGIOSGA002892 transcript:BGIOSGA002892-TA gene-biotype:protein-coding transcript-biotype:protein-coding	BGIOSGA002892-PA	495	495	S	DSAKMETDDAPNEAASGTDVNMQEAKAPADA	117.84	68.567	MET(0.008)DDAPNEAAS(0.857)GT(0.136)DVNMQEAK	MET(-20.46)DDAPNEAAS(8)GT(-8)DVNMQEAK	12	2	-0.6207	7346600	9937300	10692000	9916800	11535000	14067000					5280800
BGIOSGA002892-PA	89.801	813	BGIOSGA002892-PA	522	pep chromosome:ASM465v1:1:4720325:4725032:1 gene:BGIOSGA002892 transcript:BGIOSGA002892-TA gene-biotype:protein-coding transcript-biotype:protein-coding	BGIOSGA002892-PA	522	522	S	PADAAADGAENGAPNSEEKSVPMETDAKVEP	66.12	54.368	APADAAADGAENGAPNS(1)EEK	APADAAADGAENGAPNS(54.37)EEK	17	2	-1.1973
BGIOSGA002893-PA	38.553	347	BGIOSGA002893-PA	139	pep chromosome:ASM465v1:1:4730028:4732739:1 gene:BGIOSGA002893 transcript:BGIOSGA002893-TA gene-biotype:protein-coding transcript-biotype:protein-coding	BGIOSGA002893-PA	139	139	S	VKRYFMRSVLRNYVPSPSQRIRTQNQREYRE	96.342	91.584	NYVPS(0.963)PS(0.037)QR	NY(-75.38)VPS(14.2)PS(-14.2)QR	5	2	0.375							18902000	1183700	7631200		13874000	20862000
BGIOSGA002893-PA	38.553	347	BGIOSGA002893-PA	141	pep chromosome:ASM465v1:1:4730028:4732739:1 gene:BGIOSGA002893 transcript:BGIOSGA002893-TA gene-biotype:protein-coding transcript-biotype:protein-coding	BGIOSGA002893-PA	141	141	S	RYFMRSVLRNYVPSPSQRIRTQNQREYRERI	73.885	57.203	NYVPS(0.084)PS(0.916)QR	NY(-48.34)VPS(-10.36)PS(10.36)QR	7	2	0.84025								9344100		23266000
BGIOSGA002897-PA	336.95	3007	BGIOSGA002897-PA	2316	pep chromosome:ASM465v1:1:4824442:4842468:1 gene:BGIOSGA002897 transcript:BGIOSGA002897-TA gene-biotype:protein-coding transcript-biotype:protein-coding	BGIOSGA002897-PA	2316	2316	S	EQTADVITKIDNSMSSPRMRITERNGIRDNN	112.84	112.84	IDNS(0.007)MS(0.389)S(0.604)PR	IDNS(-19.28)MS(-1.91)S(1.91)PR	7	2	0.76619										17240000
BGIOSGA002897-PA	336.95	3007	BGIOSGA002897-PA	2315	pep chromosome:ASM465v1:1:4824442:4842468:1 gene:BGIOSGA002897 transcript:BGIOSGA002897-TA gene-biotype:protein-coding transcript-biotype:protein-coding	BGIOSGA002897-PA	2315	2315	S	IEQTADVITKIDNSMSSPRMRITERNGIRDN	127.83	103.08	IDNS(0.001)MS(0.815)S(0.183)PR	IDNS(-27.7)MS(6.48)S(-6.48)PR	6	2	-0.38355	12475000	9402900	13361000		6375500	8346600	12793000		8925500		6847500
BGIOSGA002897-PA	336.95	3007	BGIOSGA002897-PA	1623	pep chromosome:ASM465v1:1:4824442:4842468:1 gene:BGIOSGA002897 transcript:BGIOSGA002897-TA gene-biotype:protein-coding transcript-biotype:protein-coding	BGIOSGA002897-PA	1623	1623	S	KSFQQNKQCDLSSPRSPGLHVLSHGADLAPT	45.546	45.546	S(0.656)PGLHVLS(0.344)HGADLAPTLAR	S(2.8)PGLHVLS(-2.8)HGADLAPT(-40.57)LAR	1	3	-0.48473
BGIOSGA002898-PA	41.641	368	BGIOSGA002898-PA	23	pep chromosome:ASM465v1:1:4844490:4846372:1 gene:BGIOSGA002898 transcript:BGIOSGA002898-TA gene-biotype:protein-coding transcript-biotype:protein-coding	BGIOSGA002898-PA	23	23	S	PREAAAAPPAMKRSASFDRVPEEARRILHRL	181.98	125.33	SAS(1)FDRVPEEAR	S(-49.33)AS(49.33)FDRVPEEAR	3	3	0.46454	85301000	102210000	94945000	50591000	52111000	72850000	80622000	36574000	46823000	57082000	37192000	53482000
BGIOSGA002908-PA	71.347	641	BGIOSGA002908-PA	635	pep chromosome:ASM465v1:1:4915854:4921923:1 gene:BGIOSGA002908 transcript:BGIOSGA002908-TA gene-biotype:protein-coding transcript-biotype:protein-coding description:FACT complex subunit SSRP1 [Source:UniProtKB/TrEMBL;Acc:B8ADM5]	BGIOSGA002908-PA	635	635	S	SAVYRGAAAMDVDSGSGGNESD---------	62.68	46.282	GAAAMDVDS(0.136)GS(0.762)GGNES(0.102)D	GAAAMDVDS(-7.48)GS(7.48)GGNES(-8.74)D	11	2	0.12584	8270200	9851800	17741000	1467400	10194000	12944000
BGIOSGA002910-PA	46.166	419	BGIOSGA002910-PA	6	pep chromosome:ASM465v1:1:4948327:4952607:1 gene:BGIOSGA002910 transcript:BGIOSGA002910-TA gene-biotype:protein-coding transcript-biotype:protein-coding	BGIOSGA002910-PA	6	6	S	----------MAGTGSFKVTRISEGAVKPAA	67.414	67.414	AGT(0.001)GS(0.999)FK	AGT(-30.26)GS(30.26)FK	5	1	-1.8616							13193000			35025000	12562000	40392000
BGIOSGA002910-PA	46.166	419	BGIOSGA002910-PA	85	pep chromosome:ASM465v1:1:4948327:4952607:1 gene:BGIOSGA002910 transcript:BGIOSGA002910-TA gene-biotype:protein-coding transcript-biotype:protein-coding	BGIOSGA002910-PA	85	85	S	FFYPLAGRIVEPEAGSPAIRCTADGVYFAEA	102.66	77.894	IVEPEAGS(1)PAIR	IVEPEAGS(77.89)PAIR	8	2	0.582										10703000	6966700
BGIOSGA002922-PA	127.44	1184	BGIOSGA002922-PA;BGIOSGA019299-PA;BGIOSGA015509-PA	794;994;1038	pep chromosome:ASM465v1:1:5081626:5091582:1 gene:BGIOSGA002922 transcript:BGIOSGA002922-TA gene-biotype:protein-coding transcript-biotype:protein-coding;pep chromosome:ASM465v1:5:5578430:5589832:1 gene:BGIOSGA019299 transcript:BGIOSGA019299-TA gene-biotype	BGIOSGA002922-PA	794	794	S	KLQRLREFVRSEYDHSCLRSCRSRALYEGLK	63.624	56.359	SEY(0.003)DHS(0.997)CLR	S(-44.51)EY(-25.29)DHS(25.29)CLR	6	2	0.67204					5061000					14035000	7032500	14403000
BGIOSGA002926-PA	36.199	332	BGIOSGA002926-PA	192	pep chromosome:ASM465v1:1:5204125:5205874:1 gene:BGIOSGA002926 transcript:BGIOSGA002926-TA gene-biotype:protein-coding transcript-biotype:protein-coding	BGIOSGA002926-PA	192	192	S	GLIYTRVLGEGDDPSSPIGRGWHSTFLTKDK	71.879	65.895	VLGEGDDPS(0.5)S(0.5)PIGR	VLGEGDDPS(0)S(0)PIGR	10	2	4.1467										9344800
BGIOSGA002926-PA	36.199	332	BGIOSGA002926-PA	191	pep chromosome:ASM465v1:1:5204125:5205874:1 gene:BGIOSGA002926 transcript:BGIOSGA002926-TA gene-biotype:protein-coding transcript-biotype:protein-coding	BGIOSGA002926-PA	191	191	S	DGLIYTRVLGEGDDPSSPIGRGWHSTFLTKD	89.507	88.075	VLGEGDDPS(0.733)S(0.267)PIGR	VLGEGDDPS(4.38)S(-4.38)PIGR	9	2	1.5141		8787400	11239000		3732900	14090000				9344800	2727900
BGIOSGA002944-PA	58.45	532	BGIOSGA002944-PA	29	pep chromosome:ASM465v1:1:5616445:5621902:1 gene:BGIOSGA002944 transcript:BGIOSGA002944-TA gene-biotype:protein-coding transcript-biotype:protein-coding	BGIOSGA002944-PA	29	29	T	GDSPPPTALLLPRTTTTTAGAAPAPRRSSAS	86.911	86.911	T(0.003)T(0.003)T(0.96)T(0.033)TAGAAPAPR	T(-24.57)T(-24.57)T(14.57)T(-14.57)T(-36.98)AGAAPAPR	3	2	1.316	6332100	14786000		8240100	5308000		9004100	25126000	1653700		12662000	20833000
BGIOSGA002953-PA	35.463	327	BGIOSGA002953-PA	311	pep chromosome:ASM465v1:1:5841448:5844357:1 gene:BGIOSGA002953 transcript:BGIOSGA002953-TA gene-biotype:protein-coding transcript-biotype:protein-coding description:Nuclear pore complex protein NUP35 [Source:UniProtKB/TrEMBL;Acc:B8A6J8]	BGIOSGA002953-PA	311	311	S	GIGNGSGRGALGAIASPTKSVLSKVMDLMFG	121.21	121.21	GALGAIAS(0.941)PT(0.059)K	GALGAIAS(12.05)PT(-12.05)K	8	2	0.3061	17623000	29411000	24959000		8067400	11610000
BGIOSGA002953-PA	35.463	327	BGIOSGA002953-PA	68	pep chromosome:ASM465v1:1:5841448:5844357:1 gene:BGIOSGA002953 transcript:BGIOSGA002953-TA gene-biotype:protein-coding transcript-biotype:protein-coding description:Nuclear pore complex protein NUP35 [Source:UniProtKB/TrEMBL;Acc:B8A6J8]	BGIOSGA002953-PA	68	68	T	FLDDLSHHSPSPRPATPPQAAAMSPSPPPPH	118.52	118.52	PAT(1)PPQAAAMSPSPPPPHR	PAT(72.05)PPQAAAMS(-72.05)PS(-98.38)PPPPHR	3	3	-0.077945	23065000	41268000	44264000	41468000	22899000	24895000	20411000	10178000		26476000	20568000	24742000
BGIOSGA002953-PA	35.463	327	BGIOSGA002953-PA	78	pep chromosome:ASM465v1:1:5841448:5844357:1 gene:BGIOSGA002953 transcript:BGIOSGA002953-TA gene-biotype:protein-coding transcript-biotype:protein-coding description:Nuclear pore complex protein NUP35 [Source:UniProtKB/TrEMBL;Acc:B8A6J8]	BGIOSGA002953-PA	78	78	S	SPRPATPPQAAAMSPSPPPPHRGGLFSSNPL	58.373	58.373	PATPPQAAAMS(0.181)PS(0.818)PPPPHR	PAT(-32.79)PPQAAAMS(-6.55)PS(6.55)PPPPHR	13	3	1.4004	5575100	11379000	5177000	6479400						5717200	6195700
BGIOSGA002953-PA	35.463	327	BGIOSGA002953-PA	76	pep chromosome:ASM465v1:1:5841448:5844357:1 gene:BGIOSGA002953 transcript:BGIOSGA002953-TA gene-biotype:protein-coding transcript-biotype:protein-coding description:Nuclear pore complex protein NUP35 [Source:UniProtKB/TrEMBL;Acc:B8A6J8]	BGIOSGA002953-PA	76	76	S	SPSPRPATPPQAAAMSPSPPPPHRGGLFSSN	69.704	69.704	PAT(0.095)PPQAAAMS(0.901)PS(0.004)PPPPHR	PAT(-9.79)PPQAAAMS(9.79)PS(-23.15)PPPPHR	11	3	0.37663		19388000			5674900
BGIOSGA002986-PA	63.321	584	BGIOSGA002986-PA	392	pep chromosome:ASM465v1:1:6576182:6580845:1 gene:BGIOSGA002986 transcript:BGIOSGA002986-TA gene-biotype:protein-coding transcript-biotype:protein-coding	BGIOSGA002986-PA	392	392	S	WLNEAKRSVPTSGAYSNKFITDYHARTRQEH	84.352	84.352	SVPTS(0.006)GAYS(0.994)NK	S(-82.55)VPT(-46.75)S(-22.19)GAY(-63.26)S(22.19)NK	9	2	0.17728			7871600	19279000
BGIOSGA002990-PA	57.402	512	BGIOSGA002990-PA	457	pep chromosome:ASM465v1:1:6693933:6696560:1 gene:BGIOSGA002990 transcript:BGIOSGA002990-TA gene-biotype:protein-coding transcript-biotype:protein-coding	BGIOSGA002990-PA	457	457	S	PPKENTTDDNERYVGSSSPVHLEDQKGENAG	53.754	51.726	Y(0.03)VGS(0.835)S(0.618)S(0.517)PVHLEDQK	Y(-16.67)VGS(5.02)S(1.07)S(-1.07)PVHLEDQK	4	2	-0.48589	8650200	9821200	10972000		4195000
BGIOSGA002990-PA	57.402	512	BGIOSGA002990-PA	230	pep chromosome:ASM465v1:1:6693933:6696560:1 gene:BGIOSGA002990 transcript:BGIOSGA002990-TA gene-biotype:protein-coding transcript-biotype:protein-coding	BGIOSGA002990-PA	230	230	T	PKEIDNSKVLERSDSTVHAAGMEATPKQNTG	100.54	100.54	S(0.062)DS(0.307)T(0.631)VHAAGMEATPK	S(-10.1)DS(-3.12)T(3.12)VHAAGMEAT(-88.95)PK	4	2	-1.9923								5934300
BGIOSGA002990-PA	57.402	512	BGIOSGA002990-PA	227	pep chromosome:ASM465v1:1:6693933:6696560:1 gene:BGIOSGA002990 transcript:BGIOSGA002990-TA gene-biotype:protein-coding transcript-biotype:protein-coding	BGIOSGA002990-PA	227	227	S	PRKPKEIDNSKVLERSDSTVHAAGMEATPKQ	91.993	91.993	S(0.564)DS(0.397)T(0.039)VHAAGMEATPK	S(1.52)DS(-1.52)T(-11.61)VHAAGMEAT(-74.85)PK	1	2	-1.17						11358000
BGIOSGA002990-PA	57.402	512	BGIOSGA002990-PA	229	pep chromosome:ASM465v1:1:6693933:6696560:1 gene:BGIOSGA002990 transcript:BGIOSGA002990-TA gene-biotype:protein-coding transcript-biotype:protein-coding	BGIOSGA002990-PA	229	229	S	KPKEIDNSKVLERSDSTVHAAGMEATPKQNT	125.33	125.33	S(0.063)DS(0.764)T(0.173)VHAAGMEATPK	S(-10.83)DS(6.46)T(-6.46)VHAAGMEAT(-85.52)PK	3	2	-0.84117		6241500		8996400			9256300			13577000		5877100
BGIOSGA002990-PA	57.402	512	BGIOSGA002990-PA	459	pep chromosome:ASM465v1:1:6693933:6696560:1 gene:BGIOSGA002990 transcript:BGIOSGA002990-TA gene-biotype:protein-coding transcript-biotype:protein-coding	BGIOSGA002990-PA	459	459	S	KENTTDDNERYVGSSSPVHLEDQKGENAGRS	209.11	172.3	YVGSS(0.075)S(0.925)PVHLEDQK	Y(-95.62)VGS(-37.38)S(-10.89)S(10.89)PVHLEDQK	6	2	0.56507	85129000	96385000	107750000	78025000	67094000	75513000	33329000	6201500		44072000	31332000
BGIOSGA002990-PA	57.402	512	BGIOSGA002990-PA	458	pep chromosome:ASM465v1:1:6693933:6696560:1 gene:BGIOSGA002990 transcript:BGIOSGA002990-TA gene-biotype:protein-coding transcript-biotype:protein-coding	BGIOSGA002990-PA	458	458	S	PKENTTDDNERYVGSSSPVHLEDQKGENAGR	95.981	49.298	Y(0.079)VGS(0.63)S(0.657)S(0.634)PVHLEDQK	Y(-10.52)VGS(0)S(0.32)S(0)PVHLEDQK	5	2	0.47062	8650200	9821200	10972000		4195000
BGIOSGA003012-PA	215.86	1952	BGIOSGA003012-PA	1669	pep chromosome:ASM465v1:1:6900885:6912047:1 gene:BGIOSGA003012 transcript:BGIOSGA003012-TA gene-biotype:protein-coding transcript-biotype:protein-coding	BGIOSGA003012-PA	1669	1669	S	HHGMNNRQPIIEEPASPEPEHETEEMKECAI	59.294	59.294	QPIIEEPAS(0.999)PEPEHET(0.001)EEMK	QPIIEEPAS(31.46)PEPEHET(-31.46)EEMK	9	2	1.0274		21883000		10606000
BGIOSGA003014-PA	64.876	601	BGIOSGA003014-PA	46	pep chromosome:ASM465v1:1:6928219:6931313:1 gene:BGIOSGA003014 transcript:BGIOSGA003014-TA gene-biotype:protein-coding transcript-biotype:protein-coding	BGIOSGA003014-PA	46	46	S	TLPPGRLSPVSPLTHSSSSKLPTPSSSSGSS	72.835	72.835	LSPVSPLT(0.095)HS(0.263)S(0.263)S(0.263)S(0.114)K	LS(-66.17)PVS(-31.54)PLT(-4.42)HS(0)S(0)S(0)S(-3.63)K	10	2	2.3135
BGIOSGA003014-PA	64.876	601	BGIOSGA003014-PA	47	pep chromosome:ASM465v1:1:6928219:6931313:1 gene:BGIOSGA003014 transcript:BGIOSGA003014-TA gene-biotype:protein-coding transcript-biotype:protein-coding	BGIOSGA003014-PA	47	47	S	LPPGRLSPVSPLTHSSSSKLPTPSSSSGSSG	72.835	72.835	LSPVSPLT(0.095)HS(0.263)S(0.263)S(0.263)S(0.114)K	LS(-66.17)PVS(-31.54)PLT(-4.42)HS(0)S(0)S(0)S(-3.63)K	11	2	2.3135
BGIOSGA003014-PA	64.876	601	BGIOSGA003014-PA	41	pep chromosome:ASM465v1:1:6928219:6931313:1 gene:BGIOSGA003014 transcript:BGIOSGA003014-TA gene-biotype:protein-coding transcript-biotype:protein-coding	BGIOSGA003014-PA	41	41	S	TDKPDTLPPGRLSPVSPLTHSSSSKLPTPSS	66.738	66.738	LS(0.001)PVS(0.977)PLT(0.017)HS(0.002)S(0.001)S(0.001)S(0.001)K	LS(-29.74)PVS(17.51)PLT(-17.51)HS(-26.5)S(-31.21)S(-31.21)S(-29.81)K	5	2	1.0315		5974100	7096100	9982900	5559400	7961600					4893400
BGIOSGA003014-PA	64.876	601	BGIOSGA003014-PA	81	pep chromosome:ASM465v1:1:6928219:6931313:1 gene:BGIOSGA003014 transcript:BGIOSGA003014-TA gene-biotype:protein-coding transcript-biotype:protein-coding	BGIOSGA003014-PA	81	81	S	VSRAPASALASRRSHSGEIPLPSDGPPRGLR	275.76	275.76	SHS(1)GEIPLPSDGPPR	S(-48.43)HS(48.43)GEIPLPS(-150.95)DGPPR	3	2	0.53646	46826000	46764000	64105000	59124000	72389000	82587000	90458000	15599000	45184000	89206000	54535000	102680000
BGIOSGA003014-PA	64.876	601	BGIOSGA003014-PA	196	pep chromosome:ASM465v1:1:6928219:6931313:1 gene:BGIOSGA003014 transcript:BGIOSGA003014-TA gene-biotype:protein-coding transcript-biotype:protein-coding	BGIOSGA003014-PA	196	196	S	GVVVAEEDAVVRRAMSSADPEELKKAGNEQY	96.551	96.551	AMS(0.983)S(0.017)ADPEELKK	AMS(17.67)S(-17.67)ADPEELKK	3	2	-0.12459					3022300					9654200		9467500
BGIOSGA003014-PA	64.876	601	BGIOSGA003014-PA	48	pep chromosome:ASM465v1:1:6928219:6931313:1 gene:BGIOSGA003014 transcript:BGIOSGA003014-TA gene-biotype:protein-coding transcript-biotype:protein-coding	BGIOSGA003014-PA	48	48	S	PPGRLSPVSPLTHSSSSKLPTPSSSSGSSGS	72.835	65.421	LSPVS(0.004)PLT(0.097)HS(0.137)S(0.137)S(0.444)S(0.18)K	LS(-50.74)PVS(-20.85)PLT(-6.63)HS(-5.1)S(-5.1)S(3.92)S(-3.92)K	12	2	2.4037
BGIOSGA003014-PA	64.876	601	BGIOSGA003014-PA	443	pep chromosome:ASM465v1:1:6928219:6931313:1 gene:BGIOSGA003014 transcript:BGIOSGA003014-TA gene-biotype:protein-coding transcript-biotype:protein-coding	BGIOSGA003014-PA	443	443	S	VVTMHNNVKAVARARSLGNELFNSGKFSEAC	97.138	97.138	S(1)LGNELFNSGK	S(89.71)LGNELFNS(-89.71)GK	1	2	0.35034										24432000	12962000	22121000
BGIOSGA003036-PA	62.58	583	BGIOSGA003036-PA	580	pep chromosome:ASM465v1:1:7354000:7360546:1 gene:BGIOSGA003036 transcript:BGIOSGA003036-TA gene-biotype:protein-coding transcript-biotype:protein-coding	BGIOSGA003036-PA	580	580	S	LRLGGPREYRFLEHDSDSD------------	74.941	74.941	FLEHDS(0.998)DS(0.002)D	FLEHDS(26.89)DS(-26.89)D	6	2	0.63694	6848200	9179700	19572000	2709000		3139400			2690400	5612200
BGIOSGA003040-PA	30.572	279	BGIOSGA003040-PA	34	pep chromosome:ASM465v1:1:7422167:7424246:1 gene:BGIOSGA003040 transcript:BGIOSGA003040-TA gene-biotype:protein-coding transcript-biotype:protein-coding description:Reticulon-like protein [Source:UniProtKB/TrEMBL;Acc:A2WMA1]	BGIOSGA003040-PA	34	34	S	EKIADKLHIGGDGSSSDSDADERKQPKPSAP	284.07	45.879	LHIGGDGS(1)S(1)S(1)DS(1)DADER	LHIGGDGS(45.88)S(45.88)S(45.88)DS(45.88)DADER	10	2	0.87877	1493000000	20146000	1363500000	264520000	670630000	268650000	32230000	18327000	13269000	24177000	47095000	28675000
BGIOSGA003040-PA	30.572	279	BGIOSGA003040-PA	33	pep chromosome:ASM465v1:1:7422167:7424246:1 gene:BGIOSGA003040 transcript:BGIOSGA003040-TA gene-biotype:protein-coding transcript-biotype:protein-coding description:Reticulon-like protein [Source:UniProtKB/TrEMBL;Acc:A2WMA1]	BGIOSGA003040-PA	33	33	S	MEKIADKLHIGGDGSSSDSDADERKQPKPSA	291.68	45.879	LHIGGDGS(1)S(1)S(1)DS(1)DADER	LHIGGDGS(45.88)S(45.88)S(45.88)DS(45.88)DADER	9	2	0.87877	211570000	986840000	189140000	66041000	452870000	673190000	161170000	67404000	40716000	100390000	32688000	35150000
BGIOSGA003040-PA	30.572	279	BGIOSGA003040-PA	32	pep chromosome:ASM465v1:1:7422167:7424246:1 gene:BGIOSGA003040 transcript:BGIOSGA003040-TA gene-biotype:protein-coding transcript-biotype:protein-coding description:Reticulon-like protein [Source:UniProtKB/TrEMBL;Acc:A2WMA1]	BGIOSGA003040-PA	32	32	S	LMEKIADKLHIGGDGSSSDSDADERKQPKPS	283.85	45.879	LHIGGDGS(1)S(1)S(1)DS(1)DADER	LHIGGDGS(45.88)S(45.88)S(45.88)DS(45.88)DADER	8	2	0.87877	887140000	1229500000	1963400000	246630000	231910000	693040000	28167000	64640000	126910000	34220000	15979000	65418000
BGIOSGA003040-PA	30.572	279	BGIOSGA003040-PA	36	pep chromosome:ASM465v1:1:7422167:7424246:1 gene:BGIOSGA003040 transcript:BGIOSGA003040-TA gene-biotype:protein-coding transcript-biotype:protein-coding description:Reticulon-like protein [Source:UniProtKB/TrEMBL;Acc:A2WMA1]	BGIOSGA003040-PA	36	36	S	IADKLHIGGDGSSSDSDADERKQPKPSAPPA	300.28	45.879	LHIGGDGS(1)S(1)S(1)DS(1)DADER	LHIGGDGS(45.88)S(45.88)S(45.88)DS(45.88)DADER	12	2	0.87877	1473000000	1404200000	2095300000	319690000	537030000	420780000	160320000	56627000	49842000	87172000	66022000	135240000
BGIOSGA003047-PA	63.99	597	BGIOSGA003047-PA	565	pep chromosome:ASM465v1:1:7507028:7511339:1 gene:BGIOSGA003047 transcript:BGIOSGA003047-TA gene-biotype:protein-coding transcript-biotype:protein-coding	BGIOSGA003047-PA	565	565	S	SQQTQPTEFVPNRSVSMGDARQIPETEMEMG	77.662	53.756	S(0.001)VS(0.999)MGDAR	S(-31.12)VS(31.12)MGDAR	3	2	-0.46944	5397600		6408700	7075200	4343500	6946000	9018900	5168400		11298000	7743900
BGIOSGA003061-PA	77.301	714	BGIOSGA003061-PA	152	pep chromosome:ASM465v1:1:7641940:7649574:1 gene:BGIOSGA003061 transcript:BGIOSGA003061-TA gene-biotype:protein-coding transcript-biotype:protein-coding	BGIOSGA003061-PA	152	152	S	FPKRSDRPAPLFNGQSPAGRNMRSPDQQDEA	96.866	61.657	PAPLFNGQS(1)PAGR	PAPLFNGQS(61.66)PAGR	9	2	-0.19407		22045000	13838000		1894800	14915000					1394100
BGIOSGA003076-PA	74.716	693	BGIOSGA003076-PA	214	pep chromosome:ASM465v1:1:7870384:7875167:1 gene:BGIOSGA003076 transcript:BGIOSGA003076-TA gene-biotype:protein-coding transcript-biotype:protein-coding	BGIOSGA003076-PA	214	214	T	DNGGPYKSPNLRRSLTTETDKYGRYDPSEIQ	117.86	92.201	S(0.001)LT(0.992)T(0.007)ETDK	S(-31.11)LT(21.27)T(-21.27)ET(-55.62)DK	3	2	-0.0931		14144000	4195000				38972000	21419000	3465900
BGIOSGA003078-PA	50.566	473	BGIOSGA003078-PA	433	pep chromosome:ASM465v1:1:7921989:7925164:1 gene:BGIOSGA003078 transcript:BGIOSGA003078-TA gene-biotype:protein-coding transcript-biotype:protein-coding description:Histidinol dehydrogenase, chloroplastic [Source:UniProtKB/TrEMBL;Acc:A2WMG4]	BGIOSGA003078-PA	433	433	S	VSLNSFLKYITVQSLSEEGLRSLGPHVAKMA	103.85	103.85	YITVQS(0.004)LS(0.996)EEGLR	Y(-86.11)IT(-71.42)VQS(-24.39)LS(24.39)EEGLR	8	2	-0.54668	21290000	24101000		8252900
BGIOSGA003098-PA	10.545	93	BGIOSGA003098-PA;BGIOSGA003102-PA	18;18	pep chromosome:ASM465v1:1:8292579:8293862:1 gene:BGIOSGA003098 transcript:BGIOSGA003098-TA gene-biotype:protein-coding transcript-biotype:protein-coding;pep chromosome:ASM465v1:1:8316803:8323119:1 gene:BGIOSGA003102 transcript:BGIOSGA003102-TA gene-biotype	BGIOSGA003098-PA	18	18	S	VKVISRSTDEFTRERSQDLQKVFRNYDPALR	141.29	89.679	ERS(1)QDLQK	ERS(89.68)QDLQK	3	2	0.28445										12700000	4825500	9564900
BGIOSGA003104-PA	38.55	349	BGIOSGA003104-PA	100	pep chromosome:ASM465v1:1:8355661:8360276:1 gene:BGIOSGA003104 transcript:BGIOSGA003104-TA gene-biotype:protein-coding transcript-biotype:protein-coding	BGIOSGA003104-PA	100	100	S	GPGASPFYPGGAHSNSFHFNPRSADDIFAEF	149.72	123.16	GQPPPGAGGPGASPFYPGGAHS(0.063)NS(0.937)FHFNPR	GQPPPGAGGPGAS(-84.57)PFY(-76.32)PGGAHS(-11.73)NS(11.73)FHFNPR	24	4	-0.059674									26307000	108000000	68092000	58015000
BGIOSGA003185-PA	27.184	251	BGIOSGA003185-PA	229	pep chromosome:ASM465v1:1:9570587:9574209:1 gene:BGIOSGA003185 transcript:BGIOSGA003185-TA gene-biotype:protein-coding transcript-biotype:protein-coding	BGIOSGA003185-PA	229	229	T	KSAEGSQVRGGDSGTTSEVPQTPVEKSKKKN	69.045	69.045	GGDS(0.005)GT(0.054)T(0.463)S(0.206)EVPQT(0.272)PVEK	GGDS(-19.9)GT(-9.3)T(2.31)S(-3.52)EVPQT(-2.31)PVEK	7	2	0.11867
BGIOSGA003185-PA	27.184	251	BGIOSGA003185-PA	235	pep chromosome:ASM465v1:1:9570587:9574209:1 gene:BGIOSGA003185 transcript:BGIOSGA003185-TA gene-biotype:protein-coding transcript-biotype:protein-coding	BGIOSGA003185-PA	235	235	T	QVRGGDSGTTSEVPQTPVEKSKKKNKKVRIA	171.49	171.49	GGDSGTTSEVPQT(1)PVEK	GGDS(-69.88)GT(-50.07)T(-38.84)S(-42.2)EVPQT(38.84)PVEK	13	2	0.26791		2897600								28637000	15458000
BGIOSGA003193-PA	47.137	430	BGIOSGA003193-PA	203	pep chromosome:ASM465v1:1:9642212:9645437:1 gene:BGIOSGA003193 transcript:BGIOSGA003193-TA gene-biotype:protein-coding transcript-biotype:protein-coding	BGIOSGA003193-PA	203	203	S	SDSKIPSLRSLNEGASPEGRPSSSMLSVCSN	75.479	75.479	SLNEGAS(1)PEGR	S(-60.54)LNEGAS(60.54)PEGR	7	2	-1.6396		5187000	8104800	2172500	6220300	5320300	8541000	6737200	4824400
BGIOSGA003211-PA	102.35	924	BGIOSGA003211-PA	479	pep chromosome:ASM465v1:1:9939787:9948315:1 gene:BGIOSGA003211 transcript:BGIOSGA003211-TA gene-biotype:protein-coding transcript-biotype:protein-coding	BGIOSGA003211-PA	479	479	S	LSSSVTSLNKGLSNISIDNKPKSISACSLNS	106.11	58.268	GLS(1)NIS(1)IDNKPK	GLS(58.27)NIS(58.27)IDNKPK	6	2	-0.53514										39824000	17821000	13900000
BGIOSGA003211-PA	102.35	924	BGIOSGA003211-PA	465	pep chromosome:ASM465v1:1:9939787:9948315:1 gene:BGIOSGA003211 transcript:BGIOSGA003211-TA gene-biotype:protein-coding transcript-biotype:protein-coding	BGIOSGA003211-PA	465	465	S	CVGMGASDEPSHDTLSSSVTSLNKGLSNISI	55.702	55.702	SVDCVGMGAS(0.09)DEPS(0.067)HDT(0.058)LS(0.251)S(0.251)S(0.215)VT(0.051)S(0.018)LNK	S(-45)VDCVGMGAS(-4.47)DEPS(-5.76)HDT(-6.39)LS(0)S(0)S(-0.67)VT(-6.9)S(-11.41)LNK	19	3	-0.22356
BGIOSGA003211-PA	102.35	924	BGIOSGA003211-PA	722	pep chromosome:ASM465v1:1:9939787:9948315:1 gene:BGIOSGA003211 transcript:BGIOSGA003211-TA gene-biotype:protein-coding transcript-biotype:protein-coding	BGIOSGA003211-PA	722	722	S	STPENHSYRSSRLSSSPHGIPTGSSPVGSVP	178.82	88.239	LS(0.013)S(0.232)S(0.755)PHGIPTGSSPVGSVPK	LS(-17.56)S(-5.12)S(5.12)PHGIPT(-47.53)GS(-54.77)S(-62.26)PVGS(-74.55)VPK	4	3	0.17977	96826000	101310000	228760000	46948000	46634000	49036000	71304000	25574000	36882000	8533600	93381000	17706000
BGIOSGA003211-PA	102.35	924	BGIOSGA003211-PA	721	pep chromosome:ASM465v1:1:9939787:9948315:1 gene:BGIOSGA003211 transcript:BGIOSGA003211-TA gene-biotype:protein-coding transcript-biotype:protein-coding	BGIOSGA003211-PA	721	721	S	GSTPENHSYRSSRLSSSPHGIPTGSSPVGSV	174.19	103.45	LS(0.03)S(0.723)S(0.247)PHGIPT(0.247)GS(0.234)S(0.518)PVGSVPK	LS(-13.79)S(4.65)S(-4.65)PHGIPT(-3.18)GS(-3.44)S(3.18)PVGS(-32.02)VPK	3	2	0.60166	45271000			39086000	11827000	16173000	14030000		8181500		9510400
BGIOSGA003211-PA	102.35	924	BGIOSGA003211-PA	875	pep chromosome:ASM465v1:1:9939787:9948315:1 gene:BGIOSGA003211 transcript:BGIOSGA003211-TA gene-biotype:protein-coding transcript-biotype:protein-coding	BGIOSGA003211-PA	875	875	S	GLEKYWAFHHFRNQDSSPIIKHPELERLLKE	68.847	68.847	NQDS(0.807)S(0.193)PIIK	NQDS(6.21)S(-6.21)PIIK	4	2	0.34958			8183500		4250200	8441300		5822100	6479600
BGIOSGA003211-PA	102.35	924	BGIOSGA003211-PA	728	pep chromosome:ASM465v1:1:9939787:9948315:1 gene:BGIOSGA003211 transcript:BGIOSGA003211-TA gene-biotype:protein-coding transcript-biotype:protein-coding	BGIOSGA003211-PA	728	728	T	SYRSSRLSSSPHGIPTGSSPVGSVPKSFPPF	124.84	124.84	LS(0.248)S(0.325)S(0.427)PHGIPT(0.608)GS(0.269)S(0.123)PVGSVPK	LS(-2.4)S(-1.21)S(1.21)PHGIPT(3.58)GS(-3.58)S(-7.01)PVGS(-53.54)VPK	10	2	-0.24937	58777000					32429000				43404000
BGIOSGA003211-PA	102.35	924	BGIOSGA003211-PA	40	pep chromosome:ASM465v1:1:9939787:9948315:1 gene:BGIOSGA003211 transcript:BGIOSGA003211-TA gene-biotype:protein-coding transcript-biotype:protein-coding	BGIOSGA003211-PA	40	40	T	GGGGPGAPASPWRKTTPPPVAGEAVVMGAKS	104.38	84.266	KT(0.29)T(0.71)PPPVAGEAVVMGAK	KT(-3.88)T(3.88)PPPVAGEAVVMGAK	3	2	0.63634			60229000	5957400		25554000	31370000	17874000
BGIOSGA003211-PA	102.35	924	BGIOSGA003211-PA	466	pep chromosome:ASM465v1:1:9939787:9948315:1 gene:BGIOSGA003211 transcript:BGIOSGA003211-TA gene-biotype:protein-coding transcript-biotype:protein-coding	BGIOSGA003211-PA	466	466	S	VGMGASDEPSHDTLSSSVTSLNKGLSNISID	55.702	55.702	SVDCVGMGAS(0.09)DEPS(0.067)HDT(0.058)LS(0.251)S(0.251)S(0.215)VT(0.051)S(0.018)LNK	S(-45)VDCVGMGAS(-4.47)DEPS(-5.76)HDT(-6.39)LS(0)S(0)S(-0.67)VT(-6.9)S(-11.41)LNK	20	3	-0.22356
BGIOSGA003211-PA	102.35	924	BGIOSGA003211-PA	96	pep chromosome:ASM465v1:1:9939787:9948315:1 gene:BGIOSGA003211 transcript:BGIOSGA003211-TA gene-biotype:protein-coding transcript-biotype:protein-coding	BGIOSGA003211-PA	96	96	S	GGGGEPAKGAQAQQPSPPPPQSQAPNRMHKF	116.24	109.85	GAQAQQPS(1)PPPPQSQAPNR	GAQAQQPS(76.49)PPPPQS(-76.49)QAPNR	8	3	0.43043	22772000	30342000	63344000	21998000	16218000	5311100	6960000	12748000	14310000	30788000	25049000	32559000
BGIOSGA003211-PA	102.35	924	BGIOSGA003211-PA	476	pep chromosome:ASM465v1:1:9939787:9948315:1 gene:BGIOSGA003211 transcript:BGIOSGA003211-TA gene-biotype:protein-coding transcript-biotype:protein-coding	BGIOSGA003211-PA	476	476	S	HDTLSSSVTSLNKGLSNISIDNKPKSISACS	70.563	58.268	GLS(1)NIS(1)IDNKPK	GLS(58.27)NIS(58.27)IDNKPK	3	2	-0.53514		4979300				5434000				24860000		14677000
BGIOSGA003211-PA	102.35	924	BGIOSGA003211-PA	700	pep chromosome:ASM465v1:1:9939787:9948315:1 gene:BGIOSGA003211 transcript:BGIOSGA003211-TA gene-biotype:protein-coding transcript-biotype:protein-coding	BGIOSGA003211-PA	700	700	S	NRSHYGGVSESPPSNSIGYFYGSTPENHSYR	74.328	74.328	SHYGGVS(0.05)ES(0.064)PPS(0.38)NS(0.484)IGY(0.024)FY(0.009)GS(0.275)T(0.708)PENHS(0.006)YR	S(-36.34)HY(-40.97)GGVS(-9.61)ES(-9.08)PPS(-1.07)NS(1.07)IGY(-13.45)FY(-22.78)GS(-4.05)T(4.05)PENHS(-20.9)Y(-37.62)R	14	3	0.54234
BGIOSGA003211-PA	102.35	924	BGIOSGA003211-PA	39	pep chromosome:ASM465v1:1:9939787:9948315:1 gene:BGIOSGA003211 transcript:BGIOSGA003211-TA gene-biotype:protein-coding transcript-biotype:protein-coding	BGIOSGA003211-PA	39	39	T	GGGGGPGAPASPWRKTTPPPVAGEAVVMGAK	99.927	93.243	KT(0.654)T(0.346)PPPVAGEAVVMGAK	KT(2.77)T(-2.77)PPPVAGEAVVMGAK	2	2	0.46511	10945000	7294900	30517000	8033300	9710100	3375600	15163000	9260100		25448000	18034000	6086400
BGIOSGA003211-PA	102.35	924	BGIOSGA003211-PA	735	pep chromosome:ASM465v1:1:9939787:9948315:1 gene:BGIOSGA003211 transcript:BGIOSGA003211-TA gene-biotype:protein-coding transcript-biotype:protein-coding	BGIOSGA003211-PA	735	735	S	SSSPHGIPTGSSPVGSVPKSFPPFQHPSHQL	178.82	178.82	LS(0.019)S(0.391)S(0.59)PHGIPT(0.013)GS(0.267)S(0.721)PVGS(1)VPK	LS(-15.02)S(-1.78)S(1.78)PHGIPT(-17.76)GS(-4.32)S(4.32)PVGS(60.59)VPK	17	2	-0.41002	89113000	176870000	125980000	93313000	77746000	85427000	39354000	30275000	38244000	75636000	56994000	9683100
BGIOSGA003211-PA	102.35	924	BGIOSGA003211-PA	325	pep chromosome:ASM465v1:1:9939787:9948315:1 gene:BGIOSGA003211 transcript:BGIOSGA003211-TA gene-biotype:protein-coding transcript-biotype:protein-coding	BGIOSGA003211-PA	325	325	S	PPRFVQNQPPPHPVLSPELRAKILTQVEYYF	85.988	40.381	FVQNQPPPHPVLS(1)PELR	FVQNQPPPHPVLS(40.38)PELR	13	3	-0.079342		2487700		7260100							19602000	39392000
BGIOSGA003211-PA	102.35	924	BGIOSGA003211-PA	720	pep chromosome:ASM465v1:1:9939787:9948315:1 gene:BGIOSGA003211 transcript:BGIOSGA003211-TA gene-biotype:protein-coding transcript-biotype:protein-coding	BGIOSGA003211-PA	720	720	S	YGSTPENHSYRSSRLSSSPHGIPTGSSPVGS	125.18	125.18	LS(0.424)S(0.343)S(0.233)PHGIPTGSSPVGSVPK	LS(0.91)S(-0.91)S(-2.61)PHGIPT(-49.12)GS(-54.03)S(-54.03)PVGS(-92.67)VPK	2	2	0.12939
BGIOSGA003211-PA	102.35	924	BGIOSGA003211-PA	437	pep chromosome:ASM465v1:1:9939787:9948315:1 gene:BGIOSGA003211 transcript:BGIOSGA003211-TA gene-biotype:protein-coding transcript-biotype:protein-coding	BGIOSGA003211-PA	437	437	S	TSMDNTTGECNKDAYSEDEKKPHPRSVDCVG	94.287	94.287	DAYS(1)EDEKKPHPR	DAY(-44)S(44)EDEKKPHPR	4	2	-0.52641							10008000	9779800		29054000	15542000	28361000
BGIOSGA003211-PA	102.35	924	BGIOSGA003211-PA	491	pep chromosome:ASM465v1:1:9939787:9948315:1 gene:BGIOSGA003211 transcript:BGIOSGA003211-TA gene-biotype:protein-coding transcript-biotype:protein-coding	BGIOSGA003211-PA	491	491	S	SNISIDNKPKSISACSLNSQKHEAAFRTGDV	130.44	130.44	SISACS(0.998)LNS(0.002)QK	S(-86.83)IS(-47.35)ACS(27.22)LNS(-27.22)QK	6	2	-0.21908		16542000		5841100			5043300		2464000	26749000	12993000	28000000
BGIOSGA003211-PA	102.35	924	BGIOSGA003211-PA	708	pep chromosome:ASM465v1:1:9939787:9948315:1 gene:BGIOSGA003211 transcript:BGIOSGA003211-TA gene-biotype:protein-coding transcript-biotype:protein-coding	BGIOSGA003211-PA	708	708	T	SESPPSNSIGYFYGSTPENHSYRSSRLSSSP	197.66	109.05	SHYGGVS(0.027)ES(0.935)PPS(0.017)NS(0.021)IGYFY(0.001)GS(0.21)T(0.787)PENHS(0.002)YR	S(-48.56)HY(-61.29)GGVS(-15.39)ES(15.39)PPS(-17.56)NS(-16.58)IGY(-35.81)FY(-30.22)GS(-5.75)T(5.75)PENHS(-26.78)Y(-55.68)R	22	3	-0.51287	81492000	153060000	79757000	52319000		37420000		84439000	51904000	70490000	81337000	67486000
BGIOSGA003211-PA	102.35	924	BGIOSGA003211-PA	731	pep chromosome:ASM465v1:1:9939787:9948315:1 gene:BGIOSGA003211 transcript:BGIOSGA003211-TA gene-biotype:protein-coding transcript-biotype:protein-coding	BGIOSGA003211-PA	731	731	S	SSRLSSSPHGIPTGSSPVGSVPKSFPPFQHP	178.82	107.21	LS(0.348)S(0.348)S(0.304)PHGIPT(0.061)GS(0.16)S(0.785)PVGS(0.994)VPK	LS(0)S(0)S(-0.86)PHGIPT(-10.62)GS(-7.28)S(7.28)PVGS(23.44)VPK	13	2	0.34009	90849000	101310000	80645000	82229000	36346000	48655000	27017000	9376100	22748000	32623000	29339000
BGIOSGA003211-PA	102.35	924	BGIOSGA003211-PA	695	pep chromosome:ASM465v1:1:9939787:9948315:1 gene:BGIOSGA003211 transcript:BGIOSGA003211-TA gene-biotype:protein-coding transcript-biotype:protein-coding	BGIOSGA003211-PA	695	695	S	ANNTNNRSHYGGVSESPPSNSIGYFYGSTPE	197.66	165.04	SHYGGVS(0.004)ES(0.995)PPS(0.001)NSIGYFYGSTPENHSYR	S(-67.43)HY(-96.1)GGVS(-24.03)ES(24.03)PPS(-30.92)NS(-36.45)IGY(-79.86)FY(-91.37)GS(-100.77)T(-106.43)PENHS(-128.07)Y(-142.64)R	9	3	-0.9958	120370000	203990000	79757000	52319000	32155000	37420000		84439000	64830000	159630000	178280000	133380000
BGIOSGA003211-PA	102.35	924	BGIOSGA003211-PA	730	pep chromosome:ASM465v1:1:9939787:9948315:1 gene:BGIOSGA003211 transcript:BGIOSGA003211-TA gene-biotype:protein-coding transcript-biotype:protein-coding	BGIOSGA003211-PA	730	730	S	RSSRLSSSPHGIPTGSSPVGSVPKSFPPFQH	151.63	151.63	LS(0.015)S(0.415)S(0.57)PHGIPT(0.056)GS(0.617)S(0.327)PVGSVPK	LS(-15.81)S(-1.4)S(1.4)PHGIPT(-10.44)GS(2.78)S(-2.78)PVGS(-46.81)VPK	12	2	0.30809		21212000		12850000		5135100	58317000	16198000	29091000	38025000	61068000	11176000
BGIOSGA003211-PA	102.35	924	BGIOSGA003211-PA	876	pep chromosome:ASM465v1:1:9939787:9948315:1 gene:BGIOSGA003211 transcript:BGIOSGA003211-TA gene-biotype:protein-coding transcript-biotype:protein-coding	BGIOSGA003211-PA	876	876	S	LEKYWAFHHFRNQDSSPIIKHPELERLLKEE	89.171	89.171	NQDS(0.049)S(0.951)PIIK	NQDS(-12.89)S(12.89)PIIK	5	2	0.26308			8183500		4250200	8441300	18678000	7246100	6479600	52662000	3148500
BGIOSGA003227-PA	34.886	318	BGIOSGA003227-PA	255	pep chromosome:ASM465v1:1:10177659:10182083:1 gene:BGIOSGA003227 transcript:BGIOSGA003227-TA gene-biotype:protein-coding transcript-biotype:protein-coding	BGIOSGA003227-PA	255	255	S	SGGSSRPSRSLVGNMSSRTSRAVQNNQPSGF	85.813	76.068	SLVGNMS(0.932)S(0.068)R	S(-43.23)LVGNMS(11.38)S(-11.38)R	7	2	0.17624		7854300		17009000	5536500	10163000	16339000	4548400	6924900	13173000	6659500	13664000
BGIOSGA003227-PA	34.886	318	BGIOSGA003227-PA	256	pep chromosome:ASM465v1:1:10177659:10182083:1 gene:BGIOSGA003227 transcript:BGIOSGA003227-TA gene-biotype:protein-coding transcript-biotype:protein-coding	BGIOSGA003227-PA	256	256	S	GGSSRPSRSLVGNMSSRTSRAVQNNQPSGFA	64.82	64.82	SLVGNMS(0.368)S(0.632)R	S(-48.94)LVGNMS(-2.35)S(2.35)R	8	2	-0.26612
BGIOSGA003227-PA	34.886	318	BGIOSGA003227-PA	243	pep chromosome:ASM465v1:1:10177659:10182083:1 gene:BGIOSGA003227 transcript:BGIOSGA003227-TA gene-biotype:protein-coding transcript-biotype:protein-coding	BGIOSGA003227-PA	243	243	S	IASFFARIFAPSSGGSSRPSRSLVGNMSSRT	53.388	53.388	IFAPS(0.023)S(0.165)GGS(0.594)S(0.218)R	IFAPS(-14.05)S(-5.57)GGS(4.36)S(-4.36)R	9	2	1.0626				6667400
BGIOSGA003236-PA	49.583	451	BGIOSGA003236-PA	3	pep chromosome:ASM465v1:1:10325006:10329033:1 gene:BGIOSGA003236 transcript:BGIOSGA003236-TA gene-biotype:protein-coding transcript-biotype:protein-coding	BGIOSGA003236-PA	3	3	S	-------------MSSPDEDPPTEPERWRDL	106.32	106.32	S(0.5)S(0.5)PDEDPPTEPER	S(0)S(0)PDEDPPT(-92.58)EPER	2	2	-0.62641	89983000	6971900	121430000	4999300	64572000	105410000	118550000	49893000	56644000	55493000	36136000	32995000
BGIOSGA003236-PA	49.583	451	BGIOSGA003236-PA	2	pep chromosome:ASM465v1:1:10325006:10329033:1 gene:BGIOSGA003236 transcript:BGIOSGA003236-TA gene-biotype:protein-coding transcript-biotype:protein-coding	BGIOSGA003236-PA	2	2	S	--------------MSSPDEDPPTEPERWRD	106.32	106.32	S(0.5)S(0.5)PDEDPPTEPER	S(0)S(0)PDEDPPT(-92.58)EPER	1	2	-0.62641	89983000	6971900	121430000	4999300	64572000	105410000	118550000	49893000	56644000	55493000	36136000	32995000
BGIOSGA003241-PA	57.551	537	BGIOSGA003241-PA	510	pep chromosome:ASM465v1:1:10402859:10404472:1 gene:BGIOSGA003241 transcript:BGIOSGA003241-TA gene-biotype:protein-coding transcript-biotype:protein-coding	BGIOSGA003241-PA	510	510	S	DVGDEDEKKKPIPRSSPPSKAEDIRKRFSSV	81.709	81.709	S(0.5)S(0.5)PPSKAEDIR	S(0)S(0)PPS(-46.51)KAEDIR	2	2	0.096182	12800000	11076000	7355600	4721200	22231000	14207000						16196000
BGIOSGA003241-PA	57.551	537	BGIOSGA003241-PA	252	pep chromosome:ASM465v1:1:10402859:10404472:1 gene:BGIOSGA003241 transcript:BGIOSGA003241-TA gene-biotype:protein-coding transcript-biotype:protein-coding	BGIOSGA003241-PA	252	252	S	LRSVDADGEDGAGDGSSHPSDSASASGASWR	90.843	90.843	SVDADGEDGAGDGS(0.433)S(0.433)HPS(0.132)DS(0.002)ASASGASWR	S(-65.05)VDADGEDGAGDGS(0)S(0)HPS(-5.15)DS(-23.83)AS(-29.47)AS(-40.32)GAS(-44.49)WR	14	3	-0.50714
BGIOSGA003241-PA	57.551	537	BGIOSGA003241-PA	253	pep chromosome:ASM465v1:1:10402859:10404472:1 gene:BGIOSGA003241 transcript:BGIOSGA003241-TA gene-biotype:protein-coding transcript-biotype:protein-coding	BGIOSGA003241-PA	253	253	S	RSVDADGEDGAGDGSSHPSDSASASGASWRA	90.843	90.843	SVDADGEDGAGDGS(0.433)S(0.433)HPS(0.132)DS(0.002)ASASGASWR	S(-65.05)VDADGEDGAGDGS(0)S(0)HPS(-5.15)DS(-23.83)AS(-29.47)AS(-40.32)GAS(-44.49)WR	15	3	-0.50714
BGIOSGA003241-PA	57.551	537	BGIOSGA003241-PA	509	pep chromosome:ASM465v1:1:10402859:10404472:1 gene:BGIOSGA003241 transcript:BGIOSGA003241-TA gene-biotype:protein-coding transcript-biotype:protein-coding	BGIOSGA003241-PA	509	509	S	EDVGDEDEKKKPIPRSSPPSKAEDIRKRFSS	81.709	81.709	S(0.5)S(0.5)PPSKAEDIR	S(0)S(0)PPS(-46.51)KAEDIR	1	2	0.096182	12800000	11076000	7355600	4721200	22231000	14207000						16196000
BGIOSGA003317-PA	45.924	408	BGIOSGA003317-PA;BGIOSGA003157-PA;BGIOSGA018861-PA;BGIOSGA009469-PA	231;231;234;245	pep chromosome:ASM465v1:1:11821183:11823530:1 gene:BGIOSGA003317 transcript:BGIOSGA003317-TA gene-biotype:protein-coding transcript-biotype:protein-coding;pep chromosome:ASM465v1:1:9143438:9145944:1 gene:BGIOSGA003157 transcript:BGIOSGA003157-TA gene-bioty	BGIOSGA003317-PA	231	231	S	DFGSAKVLVKGEPNISYICSRYYRAPELIFG	131.52	131.52	GEPNIS(0.645)Y(0.354)ICS(0.001)R	GEPNIS(2.61)Y(-2.61)ICS(-28.89)R	6	2	0.075283				110580000			6484700	5697700			7553500
BGIOSGA003317-PA	45.924	408	BGIOSGA003317-PA;BGIOSGA003157-PA;BGIOSGA018861-PA;BGIOSGA009469-PA	232;232;235;246	pep chromosome:ASM465v1:1:11821183:11823530:1 gene:BGIOSGA003317 transcript:BGIOSGA003317-TA gene-biotype:protein-coding transcript-biotype:protein-coding;pep chromosome:ASM465v1:1:9143438:9145944:1 gene:BGIOSGA003157 transcript:BGIOSGA003157-TA gene-bioty	BGIOSGA003317-PA	232	232	Y	FGSAKVLVKGEPNISYICSRYYRAPELIFGA	120.09	108.93	GEPNIS(0.063)Y(0.922)ICS(0.015)R	GEPNIS(-11.65)Y(11.65)ICS(-18.02)R	7	2	1.31	7298800	34537000	30376000		31555000	46467000	20452000	11291000	7433700	25324000	14631000	14409000
BGIOSGA003339-PA	107.35	967	BGIOSGA003339-PA	847	pep chromosome:ASM465v1:1:12285408:12293650:1 gene:BGIOSGA003339 transcript:BGIOSGA003339-TA gene-biotype:protein-coding transcript-biotype:protein-coding	BGIOSGA003339-PA	847	847	S	RGSSKDLPRVLINTISGRWNPVNDPSAPSEH	92.611	82.494	VLINT(0.138)IS(0.862)GR	VLINT(-7.96)IS(7.96)GR	7	2	0.47035		5560500		15409000	1052600	5252400					4398100
BGIOSGA003339-PA	107.35	967	BGIOSGA003339-PA	339	pep chromosome:ASM465v1:1:12285408:12293650:1 gene:BGIOSGA003339 transcript:BGIOSGA003339-TA gene-biotype:protein-coding transcript-biotype:protein-coding	BGIOSGA003339-PA	339	339	S	SDDEEGSNASINSEKSGQQLLSVDAGPRKIS	68.044	63.894	S(1)GQQLLSVDAGPR	S(53.79)GQQLLS(-53.79)VDAGPR	1	2	-0.23842
BGIOSGA003352-PA	69.646	635	BGIOSGA003352-PA	363	pep chromosome:ASM465v1:1:12657374:12661187:1 gene:BGIOSGA003352 transcript:BGIOSGA003352-TA gene-biotype:protein-coding transcript-biotype:protein-coding	BGIOSGA003352-PA	363	363	S	NVVYRSATALGTRLQSFSGARDRVAGAGALL	160.16	160.16	LQS(1)FSGAR	LQS(52.26)FS(-52.26)GAR	3	2	-0.22348	62125000	23626000	12947000	30058000	22624000	38900000	156820000	73932000	88086000	18179000	9829700	24447000
BGIOSGA003352-PA	69.646	635	BGIOSGA003352-PA	382	pep chromosome:ASM465v1:1:12657374:12661187:1 gene:BGIOSGA003352 transcript:BGIOSGA003352-TA gene-biotype:protein-coding transcript-biotype:protein-coding	BGIOSGA003352-PA	382	382	S	ARDRVAGAGALLRPVSSKTQVVMKQAQNVAQ	94.059	94.059	VAGAGALLRPVS(0.893)S(0.107)K	VAGAGALLRPVS(9.2)S(-9.2)K	12	2	-0.26308						4162000	41029000	14808000	24058000
BGIOSGA003352-PA	69.646	635	BGIOSGA003352-PA	383	pep chromosome:ASM465v1:1:12657374:12661187:1 gene:BGIOSGA003352 transcript:BGIOSGA003352-TA gene-biotype:protein-coding transcript-biotype:protein-coding	BGIOSGA003352-PA	383	383	S	RDRVAGAGALLRPVSSKTQVVMKQAQNVAQA	71.548	66.178	VAGAGALLRPVS(0.343)S(0.657)K	VAGAGALLRPVS(-2.81)S(2.81)K	13	2	-0.48692	8169200	1440500		8022700
BGIOSGA003352-PA	69.646	635	BGIOSGA003352-PA	546	pep chromosome:ASM465v1:1:12657374:12661187:1 gene:BGIOSGA003352 transcript:BGIOSGA003352-TA gene-biotype:protein-coding transcript-biotype:protein-coding	BGIOSGA003352-PA	546	546	S	AVLKNVEDRQSFSSDSLERQQFYPPGRIMHM	75.89	50.286	QSFS(0.011)S(0.094)DS(0.895)LER	QS(-39.22)FS(-19.14)S(-9.77)DS(9.77)LER	7	2	-1.2205						2177300	7930100
BGIOSGA003372-PA	86.002	791	BGIOSGA003372-PA	401	pep chromosome:ASM465v1:1:13044647:13051543:1 gene:BGIOSGA003372 transcript:BGIOSGA003372-TA gene-biotype:protein-coding transcript-biotype:protein-coding	BGIOSGA003372-PA	401	401	S	QNKGAETDGILIDDDSSGPVGNDVKGGIHTV	118.37	118.37	GAETDGILIDDDS(0.827)S(0.173)GPVGNDVK	GAET(-83.33)DGILIDDDS(6.8)S(-6.8)GPVGNDVK	13	2	0.32324
BGIOSGA003372-PA	86.002	791	BGIOSGA003372-PA	616	pep chromosome:ASM465v1:1:13044647:13051543:1 gene:BGIOSGA003372 transcript:BGIOSGA003372-TA gene-biotype:protein-coding transcript-biotype:protein-coding	BGIOSGA003372-PA	616	616	S	TEKVCETANLRVGSNSSPVEVTSTSAPFRVE	125.54	125.54	VGS(0.002)NS(0.499)S(0.499)PVEVTSTSAPFR	VGS(-25.12)NS(0)S(0)PVEVT(-58.16)S(-65.29)T(-74.26)S(-79.89)APFR	5	2	0.26065
BGIOSGA003372-PA	86.002	791	BGIOSGA003372-PA	617	pep chromosome:ASM465v1:1:13044647:13051543:1 gene:BGIOSGA003372 transcript:BGIOSGA003372-TA gene-biotype:protein-coding transcript-biotype:protein-coding	BGIOSGA003372-PA	617	617	S	EKVCETANLRVGSNSSPVEVTSTSAPFRVEN	125.54	61.167	VGS(0.056)NS(0.189)S(0.748)PVEVT(0.005)S(0.001)TSAPFR	VGS(-11.24)NS(-5.97)S(5.97)PVEVT(-21.61)S(-27.17)T(-32.54)S(-37.7)APFR	6	2	-0.1523
BGIOSGA003373-PA	35.404	322	BGIOSGA003373-PA	220	pep chromosome:ASM465v1:1:13069782:13070750:1 gene:BGIOSGA003373 transcript:BGIOSGA003373-TA gene-biotype:protein-coding transcript-biotype:protein-coding	BGIOSGA003373-PA	220	220	S	DRSFKVPWKRALAVASPRRTTAPPRAATALE	71.451	71.451	ALAVAS(1)PR	ALAVAS(71.45)PR	6	2	-0.034653										4887400
BGIOSGA003377-PA	29.659	284	BGIOSGA003377-PA	36	pep chromosome:ASM465v1:1:13155718:13156572:1 gene:BGIOSGA003377 transcript:BGIOSGA003377-TA gene-biotype:protein-coding transcript-biotype:protein-coding	BGIOSGA003377-PA	36	36	S	QQQVAAVRQQQQQSYSPYSAGASSRVIKAPG	113.47	113.47	QQQQQS(0.008)YS(0.984)PYS(0.008)AGASSR	QQQQQS(-21.09)Y(-35.15)S(21.09)PY(-35.15)S(-21.09)AGAS(-41.49)S(-48.1)R	8	2	-0.10777					6091600					42046000	22749000	26791000
BGIOSGA003377-PA	29.659	284	BGIOSGA003377-PA	34	pep chromosome:ASM465v1:1:13155718:13156572:1 gene:BGIOSGA003377 transcript:BGIOSGA003377-TA gene-biotype:protein-coding transcript-biotype:protein-coding	BGIOSGA003377-PA	34	34	S	GFQQQVAAVRQQQQQSYSPYSAGASSRVIKA	40.52	40.52	QQQQQS(0.337)Y(0.305)S(0.337)PY(0.012)S(0.006)AGAS(0.001)S(0.001)R	QQQQQS(0)Y(-0.43)S(0)PY(-14.37)S(-17.22)AGAS(-25.51)S(-25.51)R	6	3	0.26213
BGIOSGA003388-PA	57.123	516	BGIOSGA003388-PA	127	pep chromosome:ASM465v1:1:13442907:13446486:1 gene:BGIOSGA003388 transcript:BGIOSGA003388-TA gene-biotype:protein-coding transcript-biotype:protein-coding	BGIOSGA003388-PA	127	127	S	VMVHLGVSKSKRGDESHSGSFRYMDKDLGFQ	75.115	59.265	GDES(0.972)HS(0.026)GS(0.002)FR	GDES(15.66)HS(-15.66)GS(-27.11)FR	4	2	-0.20115	4099700			3632000	3772000	11170000	8445200	3969900	6925100	35168000	4907000	6985200
BGIOSGA003388-PA	57.123	516	BGIOSGA003388-PA	129	pep chromosome:ASM465v1:1:13442907:13446486:1 gene:BGIOSGA003388 transcript:BGIOSGA003388-TA gene-biotype:protein-coding transcript-biotype:protein-coding	BGIOSGA003388-PA	129	129	S	VHLGVSKSKRGDESHSGSFRYMDKDLGFQSA	83.214	68.168	RGDES(0.001)HS(0.969)GS(0.03)FR	RGDES(-29.77)HS(15.15)GS(-15.15)FR	7	3	-0.40797			32143000	36978000			35368000	29494000	22736000			28837000
BGIOSGA003388-PA	57.123	516	BGIOSGA003388-PA	495	pep chromosome:ASM465v1:1:13442907:13446486:1 gene:BGIOSGA003388 transcript:BGIOSGA003388-TA gene-biotype:protein-coding transcript-biotype:protein-coding	BGIOSGA003388-PA	495	495	S	NRGGSTEMDSQRDNNSDTDKSDNPDSKPSRS	207.37	207.37	DNNS(0.943)DT(0.057)DKSDNPDSKPSR	DNNS(12.18)DT(-12.18)DKS(-42.18)DNPDS(-146.81)KPS(-164.46)R	4	3	-0.34176		23091000	40176000		48222000	77723000	34756000		23709000	64532000	41577000	35250000
BGIOSGA003388-PA	57.123	516	BGIOSGA003388-PA	497	pep chromosome:ASM465v1:1:13442907:13446486:1 gene:BGIOSGA003388 transcript:BGIOSGA003388-TA gene-biotype:protein-coding transcript-biotype:protein-coding	BGIOSGA003388-PA	497	497	T	GGSTEMDSQRDNNSDTDKSDNPDSKPSRSRA	141.45	119.97	DNNS(0.013)DT(0.981)DKS(0.007)DNPDSKPSR	DNNS(-18.91)DT(18.91)DKS(-21.67)DNPDS(-57.35)KPS(-69.91)R	6	3	0.12621		12343000			21164000		23764000	13693000	17550000	26162000		26122000
BGIOSGA003388-PA	57.123	516	BGIOSGA003388-PA	131	pep chromosome:ASM465v1:1:13442907:13446486:1 gene:BGIOSGA003388 transcript:BGIOSGA003388-TA gene-biotype:protein-coding transcript-biotype:protein-coding	BGIOSGA003388-PA	131	131	S	LGVSKSKRGDESHSGSFRYMDKDLGFQSADE	127.78	127.78	GDESHS(0.012)GS(0.988)FR	GDES(-50.42)HS(-19.25)GS(19.25)FR	8	2	0.20524		22295000				49733000			22863000		22519000	23441000
BGIOSGA003388-PA	57.123	516	BGIOSGA003388-PA	62	pep chromosome:ASM465v1:1:13442907:13446486:1 gene:BGIOSGA003388 transcript:BGIOSGA003388-TA gene-biotype:protein-coding transcript-biotype:protein-coding	BGIOSGA003388-PA	62	62	S	TVWLTIRSRKRVRRASANIPITQIPAISKEI	45.992	45.992	RAS(1)ANIPITQIPAISK	RAS(34.24)ANIPIT(-34.24)QIPAIS(-45.46)K	3	3	-0.51763
BGIOSGA003388-PA	57.123	516	BGIOSGA003388-PA	484	pep chromosome:ASM465v1:1:13442907:13446486:1 gene:BGIOSGA003388 transcript:BGIOSGA003388-TA gene-biotype:protein-coding transcript-biotype:protein-coding	BGIOSGA003388-PA	484	484	S	PIPRGDRRSKHNRGGSTEMDSQRDNNSDTDK	136.48	115.57	GGS(0.922)T(0.078)EMDSQR	GGS(10.75)T(-10.75)EMDS(-89.16)QR	3	2	-0.42129	4712700		3256600				42495000		33170000	25822000	21128000	18418000
BGIOSGA003388-PA	57.123	516	BGIOSGA003388-PA	149	pep chromosome:ASM465v1:1:13442907:13446486:1 gene:BGIOSGA003388 transcript:BGIOSGA003388-TA gene-biotype:protein-coding transcript-biotype:protein-coding	BGIOSGA003388-PA	149	149	S	YMDKDLGFQSADEGGSGTFRHNSAHAITAPS	93.424	93.424	DLGFQS(0.001)ADEGGS(0.886)GT(0.114)FR	DLGFQS(-32.01)ADEGGS(8.92)GT(-8.92)FR	12	2	0.84717	19219000	20632000		76001000	7757300	5503400					3950400
BGIOSGA003388-PA	57.123	516	BGIOSGA003388-PA	143	pep chromosome:ASM465v1:1:13442907:13446486:1 gene:BGIOSGA003388 transcript:BGIOSGA003388-TA gene-biotype:protein-coding transcript-biotype:protein-coding	BGIOSGA003388-PA	143	143	S	HSGSFRYMDKDLGFQSADEGGSGTFRHNSAH	57.836	53.828	DLGFQS(0.997)ADEGGS(0.002)GT(0.002)FR	DLGFQS(27.87)ADEGGS(-27.87)GT(-27.87)FR	6	2	0.29399				4905300						6224900
BGIOSGA003409-PA	75.456	686	BGIOSGA003409-PA	272	pep chromosome:ASM465v1:1:13999891:14003258:1 gene:BGIOSGA003409 transcript:BGIOSGA003409-TA gene-biotype:protein-coding transcript-biotype:protein-coding	BGIOSGA003409-PA	272	272	S	AEKFEPNSNLSGCIGSASPKMKLSNVDGLGG	65.105	65.105	FEPNSNLS(0.008)GCIGS(0.873)AS(0.118)PK	FEPNS(-33.12)NLS(-20.37)GCIGS(8.68)AS(-8.68)PK	13	2	-0.72226
BGIOSGA003409-PA	75.456	686	BGIOSGA003409-PA	274	pep chromosome:ASM465v1:1:13999891:14003258:1 gene:BGIOSGA003409 transcript:BGIOSGA003409-TA gene-biotype:protein-coding transcript-biotype:protein-coding	BGIOSGA003409-PA	274	274	S	KFEPNSNLSGCIGSASPKMKLSNVDGLGGAD	133.95	89.353	FEPNSNLSGCIGS(0.023)AS(0.977)PK	FEPNS(-57.01)NLS(-39.89)GCIGS(-16.24)AS(16.24)PK	15	2	1.64		5531300		4965700							4635200	57847000
BGIOSGA003417-PA	20.633	183	BGIOSGA003417-PA	171	pep chromosome:ASM465v1:1:14145727:14149675:1 gene:BGIOSGA003417 transcript:BGIOSGA003417-TA gene-biotype:protein-coding transcript-biotype:protein-coding description:Golgi apparatus membrane protein TVP23 [Source:UniProtKB/TrEMBL;Acc:B8A7F6]	BGIOSGA003417-PA	171	171	S	AKKNVADWTRTTLLSSGVRSTIQSAFGV---	76.843	76.843	TTLLS(0.387)S(0.613)GVR	T(-61.7)T(-61.7)LLS(-2)S(2)GVR	6	2	0.15188
BGIOSGA003476-PA	61.437	578	BGIOSGA003476-PA	17	pep chromosome:ASM465v1:1:15514584:15522040:1 gene:BGIOSGA003476 transcript:BGIOSGA003476-TA gene-biotype:protein-coding transcript-biotype:protein-coding	BGIOSGA003476-PA	17	17	S	AYCIRHSPGRCQCYPSPPTTSQRLGLPNPNS	114.7	114.7	CQCY(0.002)PS(0.956)PPT(0.019)T(0.02)S(0.003)QR	CQCY(-26.11)PS(16.84)PPT(-17.02)T(-16.84)S(-25.08)QR	6	2	0.51435	9292200		7527800	11674000		13096000					5455000
BGIOSGA003476-PA	61.437	578	BGIOSGA003476-PA	551	pep chromosome:ASM465v1:1:15514584:15522040:1 gene:BGIOSGA003476 transcript:BGIOSGA003476-TA gene-biotype:protein-coding transcript-biotype:protein-coding	BGIOSGA003476-PA	551	551	S	APGRRLFGQWIGAGRSPPPPPPPPAENRSPD	89.46	49.5	S(1)PPPPPPPPAENR	S(49.5)PPPPPPPPAENR	1	2	0.52236	18429000	5338400	44996000	20404000	13120000	17620000				13915000	8089500	11877000
BGIOSGA003476-PA	61.437	578	BGIOSGA003476-PA	569	pep chromosome:ASM465v1:1:15514584:15522040:1 gene:BGIOSGA003476 transcript:BGIOSGA003476-TA gene-biotype:protein-coding transcript-biotype:protein-coding	BGIOSGA003476-PA	569	569	S	PPPPPPAENRSPDNSSYRQMHIPRM------	42.309	42.309	SPPPPPPPPAENRS(0.273)PDNS(0.304)S(0.364)Y(0.058)R	S(-35.36)PPPPPPPPAENRS(-1.25)PDNS(-0.79)S(0.79)Y(-7.96)R	19	3	0.38703
BGIOSGA003476-PA	61.437	578	BGIOSGA003476-PA	235	pep chromosome:ASM465v1:1:15514584:15522040:1 gene:BGIOSGA003476 transcript:BGIOSGA003476-TA gene-biotype:protein-coding transcript-biotype:protein-coding	BGIOSGA003476-PA	235	235	S	GNWLYANGSRPSQDVSNDDWGHDEDFYDANQ	66.793	66.793	PS(0.02)QDVS(0.979)NDDWGHDEDFYDANQPETSR	PS(-16.85)QDVS(16.85)NDDWGHDEDFY(-35.35)DANQPET(-57.4)S(-58.1)R	6	3	3.287
BGIOSGA003476-PA	61.437	578	BGIOSGA003476-PA	564	pep chromosome:ASM465v1:1:15514584:15522040:1 gene:BGIOSGA003476 transcript:BGIOSGA003476-TA gene-biotype:protein-coding transcript-biotype:protein-coding	BGIOSGA003476-PA	564	564	S	GRSPPPPPPPPAENRSPDNSSYRQMHIPRM-	89.079	81.665	SPPPPPPPPAENRS(0.978)PDNS(0.009)S(0.011)Y(0.002)R	S(-71.95)PPPPPPPPAENRS(19.3)PDNS(-20.48)S(-19.3)Y(-27.01)R	14	3	-0.59384	120690000	153400000	132500000	125670000	49455000	55379000		7725400			23804000
BGIOSGA003491-PA	28.647	252	BGIOSGA003491-PA;BGIOSGA003494-PA	127;63	pep chromosome:ASM465v1:1:15865344:15866535:1 gene:BGIOSGA003491 transcript:BGIOSGA003491-TA gene-biotype:protein-coding transcript-biotype:protein-coding;pep chromosome:ASM465v1:1:15891293:15892476:1 gene:BGIOSGA003494 transcript:BGIOSGA003494-TA gene-bio	BGIOSGA003491-PA	127	127	S	LDFFNVVRPRVTHSPSSSELDMKEFSLIPME	97.273	97.273	VTHS(0.001)PS(0.74)S(0.165)S(0.093)ELDMK	VT(-70.62)HS(-27.93)PS(6.51)S(-6.51)S(-8.99)ELDMK	6	2	0.66846	3796600			3896800		7853600			4850300	13137000	8000200	4067600
BGIOSGA003495-PA	21.891	195	BGIOSGA003495-PA	128	pep chromosome:ASM465v1:1:15991465:15992286:1 gene:BGIOSGA003495 transcript:BGIOSGA003495-TA gene-biotype:protein-coding transcript-biotype:protein-coding	BGIOSGA003495-PA	128	128	S	SDGMTIVEAKIQKEQSSPKDIEVEVVGLQDI	126.02	46.543	EQS(0.575)S(0.424)PKDIEVEVVGLQDISGLK	EQS(1.32)S(-1.32)PKDIEVEVVGLQDIS(-38.13)GLK	3	2	0.89015	14526000			81864000	133710000	176010000
BGIOSGA003495-PA	21.891	195	BGIOSGA003495-PA	129	pep chromosome:ASM465v1:1:15991465:15992286:1 gene:BGIOSGA003495 transcript:BGIOSGA003495-TA gene-biotype:protein-coding transcript-biotype:protein-coding	BGIOSGA003495-PA	129	129	S	DGMTIVEAKIQKEQSSPKDIEVEVVGLQDIS	126.02	126.02	EQS(0.5)S(0.5)PKDIEVEVVGLQDISGLK	EQS(0)S(0)PKDIEVEVVGLQDIS(-123.51)GLK	4	3	0.54193	14526000			81864000	133710000	176010000
BGIOSGA003496-PA	122.38	1092	BGIOSGA003496-PA	117	pep chromosome:ASM465v1:1:15994869:16001698:1 gene:BGIOSGA003496 transcript:BGIOSGA003496-TA gene-biotype:protein-coding transcript-biotype:protein-coding	BGIOSGA003496-PA	117	117	S	SDRVKLTRDDLESDCSAVHTDKVLRDASLGK	67.095	67.095	DDLES(0.089)DCS(0.904)AVHT(0.007)DK	DDLES(-10.06)DCS(10.06)AVHT(-21.27)DK	8	2	-0.37977	9631100			6374500		4916100				7916700
BGIOSGA003496-PA	122.38	1092	BGIOSGA003496-PA	813	pep chromosome:ASM465v1:1:15994869:16001698:1 gene:BGIOSGA003496 transcript:BGIOSGA003496-TA gene-biotype:protein-coding transcript-biotype:protein-coding	BGIOSGA003496-PA	813	813	S	VETMEEKTNLISKKSSVPEKVYTGFEKLNDE	118.04	108.93	KS(0.003)S(0.997)VPEK	KS(-24.87)S(24.87)VPEK	3	2	0.097502							27023000	10900000	8754200	49851000	22785000
BGIOSGA003496-PA	122.38	1092	BGIOSGA003496-PA	223	pep chromosome:ASM465v1:1:15994869:16001698:1 gene:BGIOSGA003496 transcript:BGIOSGA003496-TA gene-biotype:protein-coding transcript-biotype:protein-coding	BGIOSGA003496-PA	223	223	S	TLKDEKDHNTFEHTDSIKGEVQLPDKDKNLV	236.65	236.65	DHNTFEHT(0.003)DS(0.997)IK	DHNT(-101.02)FEHT(-24.78)DS(24.78)IK	10	2	0.23532					13895000		71411000	19275000	9301300	43358000	29171000	48695000
BGIOSGA003496-PA	122.38	1092	BGIOSGA003496-PA	901	pep chromosome:ASM465v1:1:15994869:16001698:1 gene:BGIOSGA003496 transcript:BGIOSGA003496-TA gene-biotype:protein-coding transcript-biotype:protein-coding	BGIOSGA003496-PA	901	901	T	FLQVEATLKNEASTPTDVEVETVDLQHDKFY	70.281	70.281	NEAS(0.333)T(0.333)PT(0.333)DVEVETVDLQHDK	NEAS(0)T(0)PT(0)DVEVET(-39.32)VDLQHDK	7	2	0.050541
BGIOSGA003496-PA	122.38	1092	BGIOSGA003496-PA	898	pep chromosome:ASM465v1:1:15994869:16001698:1 gene:BGIOSGA003496 transcript:BGIOSGA003496-TA gene-biotype:protein-coding transcript-biotype:protein-coding	BGIOSGA003496-PA	898	898	S	ESDFLQVEATLKNEASTPTDVEVETVDLQHD	170.06	170.06	NEAS(0.641)T(0.358)PT(0.001)DVEVETVDLQHDK	NEAS(2.53)T(-2.53)PT(-30.28)DVEVET(-112.63)VDLQHDK	4	3	0.092071			465240000		7980500		20293000	7597700	5276700		13550000	24277000
BGIOSGA003496-PA	122.38	1092	BGIOSGA003496-PA	114	pep chromosome:ASM465v1:1:15994869:16001698:1 gene:BGIOSGA003496 transcript:BGIOSGA003496-TA gene-biotype:protein-coding transcript-biotype:protein-coding	BGIOSGA003496-PA	114	114	S	CEESDRVKLTRDDLESDCSAVHTDKVLRDAS	125.28	125.28	DDLES(0.999)DCS(0.001)AVHTDK	DDLES(32.82)DCS(-32.82)AVHT(-64.07)DK	5	2	-0.52907	14643000	15287000	17746000	19981000	21808000	22578000	11840000		8322700	14531000	11624000	15194000
BGIOSGA003496-PA	122.38	1092	BGIOSGA003496-PA	181	pep chromosome:ASM465v1:1:15994869:16001698:1 gene:BGIOSGA003496 transcript:BGIOSGA003496-TA gene-biotype:protein-coding transcript-biotype:protein-coding	BGIOSGA003496-PA	181	181	S	VETIEDKTNFMPEKFSEPEKVYTGFEKLNNK	105.19	105.19	TNFMPEKFS(1)EPEK	T(-96.88)NFMPEKFS(96.88)EPEK	9	2	-0.023434	12898000			12520000		13566000			4432400		7921600
BGIOSGA003496-PA	122.38	1092	BGIOSGA003496-PA	475	pep chromosome:ASM465v1:1:15994869:16001698:1 gene:BGIOSGA003496 transcript:BGIOSGA003496-TA gene-biotype:protein-coding transcript-biotype:protein-coding	BGIOSGA003496-PA	475	475	S	PNTKENNKMVGVVVDSPEKHTSLETLETREH	128.52	100.02	MVGVVVDS(1)PEK	MVGVVVDS(100.02)PEK	8	2	0.041562	27935000	31134000	19293000	45668000	61233000	75461000
BGIOSGA003496-PA	122.38	1092	BGIOSGA003496-PA	493	pep chromosome:ASM465v1:1:15994869:16001698:1 gene:BGIOSGA003496 transcript:BGIOSGA003496-TA gene-biotype:protein-coding transcript-biotype:protein-coding	BGIOSGA003496-PA	493	493	S	KHTSLETLETREHVTSEDEEEIDVGHLGESS	220.76	125.97	EHVT(0.009)S(0.991)EDEEEIDVGHLGESSGNDTGFLDK	EHVT(-20.3)S(20.3)EDEEEIDVGHLGES(-90.06)S(-90.17)GNDT(-97.26)GFLDK	5	3	0.34972		10810000		47528000	95651000	66655000	126130000	252970000	195100000	182960000	211960000	191130000
BGIOSGA003496-PA	122.38	1092	BGIOSGA003496-PA	481	pep chromosome:ASM465v1:1:15994869:16001698:1 gene:BGIOSGA003496 transcript:BGIOSGA003496-TA gene-biotype:protein-coding transcript-biotype:protein-coding	BGIOSGA003496-PA	481	481	S	NKMVGVVVDSPEKHTSLETLETREHVTSEDE	151.92	140.09	HT(0.004)S(0.996)LETLETR	HT(-24.44)S(24.44)LET(-79.78)LET(-98.38)R	3	2	-0.070005	31839000		16975000	53588000		47160000					3526000
BGIOSGA003496-PA	122.38	1092	BGIOSGA003496-PA	715	pep chromosome:ASM465v1:1:15994869:16001698:1 gene:BGIOSGA003496 transcript:BGIOSGA003496-TA gene-biotype:protein-coding transcript-biotype:protein-coding	BGIOSGA003496-PA	715	715	S	LVKEDTNKIKLLEADSNIKSNADKKDIQILQ	118.28	88.134	LLEADS(1)NIK	LLEADS(88.13)NIK	6	2	-0.45465		49571000	30579000	2031900		59743000	111710000	57198000	56901000	116050000		108930000
BGIOSGA003496-PA	122.38	1092	BGIOSGA003496-PA	998	pep chromosome:ASM465v1:1:15994869:16001698:1 gene:BGIOSGA003496 transcript:BGIOSGA003496-TA gene-biotype:protein-coding transcript-biotype:protein-coding	BGIOSGA003496-PA	998	998	S	IEKEDANGIEFKNVESDIRSNADQKDIQILH	57.859	57.859	NVES(1)DIR	NVES(57.86)DIR	4	2	-0.10567	1054700			5820300			11713000		6196000	12834000	5597900	8782400
BGIOSGA003496-PA	122.38	1092	BGIOSGA003496-PA	393	pep chromosome:ASM465v1:1:15994869:16001698:1 gene:BGIOSGA003496 transcript:BGIOSGA003496-TA gene-biotype:protein-coding transcript-biotype:protein-coding	BGIOSGA003496-PA	393	393	S	LVEEDAKKIKLEEADSDIKSNVDKKAFQILQ	188.9	54.784	LEEADS(1)DIK	LEEADS(54.78)DIK	6	2	-0.67331	17427000	15779000	3699000		27506000	18307000	63453000	41339000		101440000	48859000	89226000
BGIOSGA003496-PA	122.38	1092	BGIOSGA003496-PA	397	pep chromosome:ASM465v1:1:15994869:16001698:1 gene:BGIOSGA003496 transcript:BGIOSGA003496-TA gene-biotype:protein-coding transcript-biotype:protein-coding	BGIOSGA003496-PA	397	397	S	DAKKIKLEEADSDIKSNVDKKAFQILQCEYM	143.43	143.43	LEEADSDIKS(1)NVDKK	LEEADS(-46.94)DIKS(46.94)NVDKK	10	2	-0.078651					5468700	5426200	12325000	8365800	6683700	23448000	14311000	18054000
BGIOSGA003496-PA	122.38	1092	BGIOSGA003496-PA	899	pep chromosome:ASM465v1:1:15994869:16001698:1 gene:BGIOSGA003496 transcript:BGIOSGA003496-TA gene-biotype:protein-coding transcript-biotype:protein-coding	BGIOSGA003496-PA	899	899	T	SDFLQVEATLKNEASTPTDVEVETVDLQHDK	267.41	225.86	NEAS(0.003)T(0.997)PTDVEVETVDLQHDK	NEAS(-24.92)T(24.92)PT(-49)DVEVET(-118.71)VDLQHDK	5	2	0.32533	706650000	762400000		692520000	251810000	256450000	80376000	87222000	61006000	142030000	214020000	153240000
BGIOSGA003496-PA	122.38	1092	BGIOSGA003496-PA	530	pep chromosome:ASM465v1:1:15994869:16001698:1 gene:BGIOSGA003496 transcript:BGIOSGA003496-TA gene-biotype:protein-coding transcript-biotype:protein-coding	BGIOSGA003496-PA	530	530	S	LDKEDTNKIELQEADSGIQCNDDQKPIKILL	86.211	86.211	IELQEADS(1)GIQCNDDQKPIK	IELQEADS(86.21)GIQCNDDQKPIK	8	3	-0.79179				18678000			19644000		8974000	25279000	10399000	22786000
BGIOSGA003496-PA	122.38	1092	BGIOSGA003496-PA	221	pep chromosome:ASM465v1:1:15994869:16001698:1 gene:BGIOSGA003496 transcript:BGIOSGA003496-TA gene-biotype:protein-coding transcript-biotype:protein-coding	BGIOSGA003496-PA	221	221	T	INTLKDEKDHNTFEHTDSIKGEVQLPDKDKN	125.49	63.16	DHNT(0.001)FEHT(0.73)DS(0.269)IK	DHNT(-27.39)FEHT(4.34)DS(-4.34)IK	8	2	1.5326						15318000	30261000	38880000	9072700	41028000	20895000	51974000
BGIOSGA003496-PA	122.38	1092	BGIOSGA003496-PA	492	pep chromosome:ASM465v1:1:15994869:16001698:1 gene:BGIOSGA003496 transcript:BGIOSGA003496-TA gene-biotype:protein-coding transcript-biotype:protein-coding	BGIOSGA003496-PA	492	492	T	EKHTSLETLETREHVTSEDEEEIDVGHLGES	140.41	59.352	EHVT(0.526)S(0.473)EDEEEIDVGHLGESSGNDTGFLDKEDTNK	EHVT(0.46)S(-0.46)EDEEEIDVGHLGES(-33.7)S(-33.7)GNDT(-36.65)GFLDKEDT(-53.1)NK	4	4	-0.041573										107680000
BGIOSGA003496-PA	122.38	1092	BGIOSGA003496-PA	422	pep chromosome:ASM465v1:1:15994869:16001698:1 gene:BGIOSGA003496 transcript:BGIOSGA003496-TA gene-biotype:protein-coding transcript-biotype:protein-coding	BGIOSGA003496-PA	422	422	S	LQCEYMDEAKFGTVDSKSNYLAVHEDNVQRE	103.01	103.01	FGTVDS(1)K	FGT(-55.05)VDS(55.05)K	6	1	-0.4797		3068800			2038400	6027000		4492600	4173100	7722100	6092500	8110900
BGIOSGA003496-PA	122.38	1092	BGIOSGA003496-PA	276	pep chromosome:ASM465v1:1:15994869:16001698:1 gene:BGIOSGA003496 transcript:BGIOSGA003496-TA gene-biotype:protein-coding transcript-biotype:protein-coding	BGIOSGA003496-PA	276	276	S	RSIETLQGEEGDGVKSMEDFLKSDCMIVQAN	125.39	125.39	SIETLQGEEGDGVKS(1)MEDFLK	S(-116.88)IET(-85.3)LQGEEGDGVKS(85.3)MEDFLK	15	3	1.0202		32002000		34259000
BGIOSGA003496-PA	122.38	1092	BGIOSGA003496-PA	344	pep chromosome:ASM465v1:1:15994869:16001698:1 gene:BGIOSGA003496 transcript:BGIOSGA003496-TA gene-biotype:protein-coding transcript-biotype:protein-coding	BGIOSGA003496-PA	344	344	S	DKMVTMEMESLVKNLSLELLESEKNVMLEYE	190.37	153.15	NLS(1)LELLESEK	NLS(96.82)LELLES(-96.82)EK	3	2	-0.2637	98940000	98445000		306460000	56893000	158020000	42864000		51402000	79102000	62456000	67754000
BGIOSGA003496-PA	122.38	1092	BGIOSGA003496-PA	1002	pep chromosome:ASM465v1:1:15994869:16001698:1 gene:BGIOSGA003496 transcript:BGIOSGA003496-TA gene-biotype:protein-coding transcript-biotype:protein-coding	BGIOSGA003496-PA	1002	1002	S	DANGIEFKNVESDIRSNADQKDIQILHCEYV	198.04	198.04	NVESDIRS(1)NADQK	NVES(-56.22)DIRS(56.22)NADQK	8	2	0.7864		49389000		34421000	60328000	56020000		34161000	29326000			8081600
BGIOSGA003496-PA	122.38	1092	BGIOSGA003496-PA	262	pep chromosome:ASM465v1:1:15994869:16001698:1 gene:BGIOSGA003496 transcript:BGIOSGA003496-TA gene-biotype:protein-coding transcript-biotype:protein-coding	BGIOSGA003496-PA	262	262	S	LEVMHSVSLSYAELRSIETLQGEEGDGVKSM	60.196	47.668	S(0.996)IET(0.004)LQGEEGDGVK	S(23.52)IET(-23.52)LQGEEGDGVK	1	2	0.45974	5703900				5870300	5402700
BGIOSGA003496-PA	122.38	1092	BGIOSGA003496-PA	87	pep chromosome:ASM465v1:1:15994869:16001698:1 gene:BGIOSGA003496 transcript:BGIOSGA003496-TA gene-biotype:protein-coding transcript-biotype:protein-coding	BGIOSGA003496-PA	87	87	S	EVEESELKVTGLVVVSDIELRTTEAIRCEES	152	105.99	VTGLVVVS(1)DIELR	VT(-85.71)GLVVVS(85.71)DIELR	8	2	0.36632				14983000		26356000
BGIOSGA003497-PA	123.89	1102	BGIOSGA003497-PA	200	pep chromosome:ASM465v1:1:16003864:16007589:1 gene:BGIOSGA003497 transcript:BGIOSGA003497-TA gene-biotype:protein-coding transcript-biotype:protein-coding	BGIOSGA003497-PA	200	200	T	ENDKNIILKNKKGRNTFEHTNKIGGDIQLLV	162.31	152.31	GRNT(1)FEHTNK	GRNT(64.43)FEHT(-64.43)NK	4	2	-0.1158	19717000	14847000	10988000		31468000	24313000	219360000	115140000	129980000	394830000	207660000	457390000
BGIOSGA003497-PA	123.89	1102	BGIOSGA003497-PA	333	pep chromosome:ASM465v1:1:16003864:16007589:1 gene:BGIOSGA003497 transcript:BGIOSGA003497-TA gene-biotype:protein-coding transcript-biotype:protein-coding	BGIOSGA003497-PA	333	333	S	ISVVMQNKLQKDVKLSLGKKIVSEISRKPIN	136.02	85.672	DVKLS(1)LGKK	DVKLS(85.67)LGKK	5	2	-0.083393	15757000	18419000	5089500	16108000	20607000	28550000	60546000	23817000	22657000	93802000	41013000	58791000
BGIOSGA003497-PA	123.89	1102	BGIOSGA003497-PA	164	pep chromosome:ASM465v1:1:16003864:16007589:1 gene:BGIOSGA003497 transcript:BGIOSGA003497-TA gene-biotype:protein-coding transcript-biotype:protein-coding	BGIOSGA003497-PA	164	164	S	VQHVEEKTNFVPEKSSVPEKVFTEFEKLNDE	71.879	71.879	TNFVPEKS(0.5)S(0.5)VPEK	T(-61.53)NFVPEKS(0)S(0)VPEK	9	2	0.30807							5258700		1863900	11055000	4310200
BGIOSGA003497-PA	123.89	1102	BGIOSGA003497-PA	441	pep chromosome:ASM465v1:1:16003864:16007589:1 gene:BGIOSGA003497 transcript:BGIOSGA003497-TA gene-biotype:protein-coding transcript-biotype:protein-coding	BGIOSGA003497-PA	441	441	T	AITGDEEGIDSSILVTDLQHVASGSHGGNMC	64.148	64.148	EAITGDEEGIDS(0.029)S(0.029)ILVT(0.331)DLQHVAS(0.279)GS(0.331)HGGNMCPK	EAIT(-49.31)GDEEGIDS(-10.55)S(-10.55)ILVT(0)DLQHVAS(-0.75)GS(0)HGGNMCPK	17	3	2.113
BGIOSGA003497-PA	123.89	1102	BGIOSGA003497-PA	914	pep chromosome:ASM465v1:1:16003864:16007589:1 gene:BGIOSGA003497 transcript:BGIOSGA003497-TA gene-biotype:protein-coding transcript-biotype:protein-coding	BGIOSGA003497-PA	914	914	S	VEFSKDMKKSRIHFNSSFRSKHVDDASHCLG	144.77	135.71	IHFNS(0.762)S(0.238)FR	IHFNS(5.06)S(-5.06)FR	5	2	0.045118	9020500	4423800		39965000	18655000		36351000	4638400	16757000	67048000	28604000	48936000
BGIOSGA003497-PA	123.89	1102	BGIOSGA003497-PA	531	pep chromosome:ASM465v1:1:16003864:16007589:1 gene:BGIOSGA003497 transcript:BGIOSGA003497-TA gene-biotype:protein-coding transcript-biotype:protein-coding	BGIOSGA003497-PA	531	531	S	GANTMDFNLDHHHHKSSQQYHDNQKDLSFSC	174.4	174.4	S(0.755)S(0.245)QQYHDNQK	S(4.88)S(-4.88)QQY(-125.3)HDNQK	1	2	-0.079059								7420800	6405600	85411000	31245000	38890000
BGIOSGA003497-PA	123.89	1102	BGIOSGA003497-PA	245	pep chromosome:ASM465v1:1:16003864:16007589:1 gene:BGIOSGA003497 transcript:BGIOSGA003497-TA gene-biotype:protein-coding transcript-biotype:protein-coding	BGIOSGA003497-PA	245	245	S	LEVANSVVVSDPELRSIESFQCEENDGMKLT	184.71	82.651	S(1)IES(1)FQCEENDGMK	S(82.65)IES(82.65)FQCEENDGMK	1	2	2.1102		36983000		44900000	34550000	45249000		13875000	3287500	36475000	21269000
BGIOSGA003497-PA	123.89	1102	BGIOSGA003497-PA	450	pep chromosome:ASM465v1:1:16003864:16007589:1 gene:BGIOSGA003497 transcript:BGIOSGA003497-TA gene-biotype:protein-coding transcript-biotype:protein-coding	BGIOSGA003497-PA	450	450	S	DSSILVTDLQHVASGSHGGNMCPKYFRSSES	64.148	64.148	EAITGDEEGIDS(0.029)S(0.029)ILVT(0.331)DLQHVAS(0.279)GS(0.331)HGGNMCPK	EAIT(-49.31)GDEEGIDS(-10.55)S(-10.55)ILVT(0)DLQHVAS(-0.75)GS(0)HGGNMCPK	26	3	2.113
BGIOSGA003497-PA	123.89	1102	BGIOSGA003497-PA	248	pep chromosome:ASM465v1:1:16003864:16007589:1 gene:BGIOSGA003497 transcript:BGIOSGA003497-TA gene-biotype:protein-coding transcript-biotype:protein-coding	BGIOSGA003497-PA	248	248	S	ANSVVVSDPELRSIESFQCEENDGMKLTRNY	216.15	82.651	S(1)IES(1)FQCEENDGMK	S(82.65)IES(82.65)FQCEENDGMK	4	2	2.1102	906680000	1018300000	486380000	1028800000	531360000	698060000	400550000	301970000	343240000	516670000	399550000	342490000
BGIOSGA003497-PA	123.89	1102	BGIOSGA003497-PA	475	pep chromosome:ASM465v1:1:16003864:16007589:1 gene:BGIOSGA003497 transcript:BGIOSGA003497-TA gene-biotype:protein-coding transcript-biotype:protein-coding	BGIOSGA003497-PA	475	475	S	FRSSESNSSSRTCISSYNDTKMEYNFTDMTV	72.652	72.652	TCIS(0.13)S(0.864)YNDT(0.005)K	T(-52.66)CIS(-8.21)S(8.21)Y(-38.27)NDT(-22.36)K	5	2	-0.27542	3736300					2454300	3066200		3251200	24477000	11711000
BGIOSGA003497-PA	123.89	1102	BGIOSGA003497-PA	163	pep chromosome:ASM465v1:1:16003864:16007589:1 gene:BGIOSGA003497 transcript:BGIOSGA003497-TA gene-biotype:protein-coding transcript-biotype:protein-coding	BGIOSGA003497-PA	163	163	S	IVQHVEEKTNFVPEKSSVPEKVFTEFEKLND	71.879	71.879	TNFVPEKS(0.5)S(0.5)VPEK	T(-61.53)NFVPEKS(0)S(0)VPEK	8	2	0.30807							5258700		1863900	11055000	4310200
BGIOSGA003497-PA	123.89	1102	BGIOSGA003497-PA	343	pep chromosome:ASM465v1:1:16003864:16007589:1 gene:BGIOSGA003497 transcript:BGIOSGA003497-TA gene-biotype:protein-coding transcript-biotype:protein-coding	BGIOSGA003497-PA	343	343	S	KDVKLSLGKKIVSEISRKPINEDVVLSSEQA	99.688	99.688	IVSEIS(1)R	IVS(-39.25)EIS(39.25)R	6	2	0.51646	4508700	10246000		1731300			16500000	9112500	10902000		9787800	18283000
BGIOSGA003497-PA	123.89	1102	BGIOSGA003497-PA	532	pep chromosome:ASM465v1:1:16003864:16007589:1 gene:BGIOSGA003497 transcript:BGIOSGA003497-TA gene-biotype:protein-coding transcript-biotype:protein-coding	BGIOSGA003497-PA	532	532	S	ANTMDFNLDHHHHKSSQQYHDNQKDLSFSCN	160.91	117.25	S(0.5)S(0.5)QQYHDNQK	S(0)S(0)QQY(-74.65)HDNQK	2	2	-0.46732								7420800	6405600		31245000	38890000
BGIOSGA003497-PA	123.89	1102	BGIOSGA003497-PA	915	pep chromosome:ASM465v1:1:16003864:16007589:1 gene:BGIOSGA003497 transcript:BGIOSGA003497-TA gene-biotype:protein-coding transcript-biotype:protein-coding	BGIOSGA003497-PA	915	915	S	EFSKDMKKSRIHFNSSFRSKHVDDASHCLGY	124.23	114.97	IHFNS(0.03)S(0.97)FR	IHFNS(-15.15)S(15.15)FR	6	2	-0.43835	7229300	4423800		27106000	4577300	36314000		4638400	2454700	4766400	5450800	48936000
BGIOSGA003497-PA	123.89	1102	BGIOSGA003497-PA	622	pep chromosome:ASM465v1:1:16003864:16007589:1 gene:BGIOSGA003497 transcript:BGIOSGA003497-TA gene-biotype:protein-coding transcript-biotype:protein-coding	BGIOSGA003497-PA	622	622	S	VMDQGWNKKILSTVNSYTKKCPPDIILYVDR	98.902	94.538	ILS(0.001)T(0.012)VNS(0.938)YT(0.049)K	ILS(-29.26)T(-18.97)VNS(12.86)Y(-39.82)T(-12.86)K	7	2	-0.11259	13587000	8062900		26681000		34546000	16357000			47648000	31554000	27223000
BGIOSGA003497-PA	123.89	1102	BGIOSGA003497-PA	340	pep chromosome:ASM465v1:1:16003864:16007589:1 gene:BGIOSGA003497 transcript:BGIOSGA003497-TA gene-biotype:protein-coding transcript-biotype:protein-coding	BGIOSGA003497-PA	340	340	S	KLQKDVKLSLGKKIVSEISRKPINEDVVLSS	131.22	131.22	IVS(1)EISR	IVS(64.87)EIS(-64.87)R	3	2	0.4259	16768000	31956000		17286000	10873000	15887000	45130000	21292000	26469000	44953000	23714000	42190000
BGIOSGA003505-PA	29.807	265	BGIOSGA003505-PA;BGIOSGA007295-PA;BGIOSGA019732-PA	128;128;144	pep chromosome:ASM465v1:1:16113067:16114748:1 gene:BGIOSGA003505 transcript:BGIOSGA003505-TA gene-biotype:protein-coding transcript-biotype:protein-coding description:40S ribosomal protein S4 [Source:UniProtKB/TrEMBL;Acc:A2WPV4];pep chromosome:ASM465v1:2:3	BGIOSGA003505-PA;BGIOSGA007295-PA;BGIOSGA019732-PA	128;128;144	128	S	SIKDEDAKFKLCKVRSVQFGQKGIPFLNTND;SVKDEDAKFKLCKVRSVQFGQKGIPYLNTYD	138.24	138.24	VRS(1)VQFGQK	VRS(138.24)VQFGQK	3	2	-0.11295	10463000	11596000	10098000	35522000	15240000	15820000	13671000		10255000	37741000	18788000	35799000
BGIOSGA003505-PA	29.807	265	BGIOSGA003505-PA;BGIOSGA007295-PA	113;113	pep chromosome:ASM465v1:1:16113067:16114748:1 gene:BGIOSGA003505 transcript:BGIOSGA003505-TA gene-biotype:protein-coding transcript-biotype:protein-coding description:40S ribosomal protein S4 [Source:UniProtKB/TrEMBL;Acc:A2WPV4];pep chromosome:ASM465v1:2:3	BGIOSGA003505-PA;BGIOSGA007295-PA	113;113	113	S	NYRLLYDTKGRFRLQSVKDEDAKFKLCKVRS	84.169	69.352	LQS(1)VKDEDAK	LQS(69.35)VKDEDAK	3	2	2.0496							7955500	5832800	4798900	18673000	7649900	13866000
BGIOSGA003516-PA	128.01	1153	BGIOSGA003516-PA	390	pep chromosome:ASM465v1:1:16400896:16412240:1 gene:BGIOSGA003516 transcript:BGIOSGA003516-TA gene-biotype:protein-coding transcript-biotype:protein-coding	BGIOSGA003516-PA	390	390	T	REPSKAKSVARVSSDTPAAGNSASTGGGSTE	81.016	81.016	VS(0.313)S(0.313)DT(0.374)PAAGNSASTGGGSTER	VS(-0.78)S(-0.78)DT(0.78)PAAGNS(-56.79)AS(-66.69)T(-70.69)GGGS(-73.33)T(-73.02)ER	5	2	0.18791
BGIOSGA003516-PA	128.01	1153	BGIOSGA003516-PA	387	pep chromosome:ASM465v1:1:16400896:16412240:1 gene:BGIOSGA003516 transcript:BGIOSGA003516-TA gene-biotype:protein-coding transcript-biotype:protein-coding	BGIOSGA003516-PA	387	387	S	VVLREPSKAKSVARVSSDTPAAGNSASTGGG	60.55	60.55	VS(0.333)S(0.333)DT(0.333)PAAGNSASTGGGSTER	VS(0)S(0)DT(0)PAAGNS(-42.19)AS(-49.61)T(-54.84)GGGS(-59.65)T(-59.65)ER	2	2	0.19255
BGIOSGA003516-PA	128.01	1153	BGIOSGA003516-PA	388	pep chromosome:ASM465v1:1:16400896:16412240:1 gene:BGIOSGA003516 transcript:BGIOSGA003516-TA gene-biotype:protein-coding transcript-biotype:protein-coding	BGIOSGA003516-PA	388	388	S	VLREPSKAKSVARVSSDTPAAGNSASTGGGS	60.55	60.55	VS(0.333)S(0.333)DT(0.333)PAAGNSASTGGGSTER	VS(0)S(0)DT(0)PAAGNS(-42.19)AS(-49.61)T(-54.84)GGGS(-59.65)T(-59.65)ER	3	2	0.19255
BGIOSGA003522-PA	61.755	558	BGIOSGA003522-PA	42	pep chromosome:ASM465v1:1:16685752:16693342:1 gene:BGIOSGA003522 transcript:BGIOSGA003522-TA gene-biotype:protein-coding transcript-biotype:protein-coding	BGIOSGA003522-PA	42	42	S	SPMPAPSTDSPAADQSPGRGRPRRRLGRKPG	145.05	145.05	SSPMPAPSTDSPAADQS(1)PGR	S(-122.22)S(-122.22)PMPAPS(-74.26)T(-67.83)DS(-41.17)PAADQS(41.17)PGR	17	2	0.40097	4070300	6759100	10283000		8994300	12489000				17094000	9724500	13996000
BGIOSGA003522-PA	61.755	558	BGIOSGA003522-PA	11	pep chromosome:ASM465v1:1:16685752:16693342:1 gene:BGIOSGA003522 transcript:BGIOSGA003522-TA gene-biotype:protein-coding transcript-biotype:protein-coding	BGIOSGA003522-PA	11	11	S	-----MGCVFGRPSSSPPAAAARKGRRKKRS	72.272	72.272	PSS(0.154)S(0.846)PPAAAAR	PS(-34.11)S(-7.41)S(7.41)PPAAAAR	4	2	1.5331					10087000	12908000		5106500			3524500	14354000
BGIOSGA003547-PA	24.23	214	BGIOSGA003547-PA	89	pep chromosome:ASM465v1:1:17118217:17119313:1 gene:BGIOSGA003547 transcript:BGIOSGA003547-TA gene-biotype:protein-coding transcript-biotype:protein-coding	BGIOSGA003547-PA	89	89	S	VLRKNNSELLKEHNLSDAAKVDVWLEAESHH	63.212	63.212	EHNLS(1)DAAK	EHNLS(63.21)DAAK	5	2	0.88791						4852900
BGIOSGA003547-PA	24.23	214	BGIOSGA003547-PA	80	pep chromosome:ASM465v1:1:17118217:17119313:1 gene:BGIOSGA003547 transcript:BGIOSGA003547-TA gene-biotype:protein-coding transcript-biotype:protein-coding	BGIOSGA003547-PA	80	80	S	FESRAISKYVLRKNNSELLKEHNLSDAAKVD	130.23	130.23	KNNS(1)ELLK	KNNS(130.23)ELLK	4	2	-0.21703	32453000		7735900			2042500	1611500	1118100	6833500	1704500
BGIOSGA003557-PA	44.891	415	BGIOSGA003557-PA	103	pep chromosome:ASM465v1:1:17440756:17444912:1 gene:BGIOSGA003557 transcript:BGIOSGA003557-TA gene-biotype:protein-coding transcript-biotype:protein-coding	BGIOSGA003557-PA	103	103	S	RSSQPPPPKALSAAGSFGKKMTMDDLIARQI	119.45	110.66	ALSAAGS(1)FGK	ALS(-60.37)AAGS(60.37)FGK	7	2	0.45169	24031000	29018000	16697000	114910000	24008000	37890000	68678000	19624000	25058000	34697000	23787000	32762000
BGIOSGA003606-PA	29.899	262	BGIOSGA003606-PA	195	pep chromosome:ASM465v1:1:19376340:19378630:1 gene:BGIOSGA003606 transcript:BGIOSGA003606-TA gene-biotype:protein-coding transcript-biotype:protein-coding	BGIOSGA003606-PA	195	195	S	SKKLLGEGRLKLMLNSDGELEEEQETHAERH	107.45	107.45	LMLNS(1)DGELEEEQETHAER	LMLNS(82.66)DGELEEEQET(-82.66)HAER	5	2	-0.35895	14303000	27244000	35749000						8038400
BGIOSGA003610-PA	33.803	319	BGIOSGA003610-PA	135	pep chromosome:ASM465v1:1:19528628:19532749:1 gene:BGIOSGA003610 transcript:BGIOSGA003610-TA gene-biotype:protein-coding transcript-biotype:protein-coding	BGIOSGA003610-PA	135	135	S	GESSAATSATTGMGESHSPPLPKVGKSPAMS	42.039	42.039	VPGES(0.001)S(0.001)AAT(0.003)S(0.003)AT(0.003)T(0.003)GMGES(0.56)HS(0.425)PPLPK	VPGES(-27.8)S(-27.8)AAT(-22.5)S(-22.5)AT(-22.5)T(-22.16)GMGES(1.2)HS(-1.2)PPLPK	18	3	0.5173	5398900		19675000	5769500	5887400					16381000	11178000
BGIOSGA003610-PA	33.803	319	BGIOSGA003610-PA	137	pep chromosome:ASM465v1:1:19528628:19532749:1 gene:BGIOSGA003610 transcript:BGIOSGA003610-TA gene-biotype:protein-coding transcript-biotype:protein-coding	BGIOSGA003610-PA	137	137	S	SSAATSATTGMGESHSPPLPKVGKSPAMSKP	41.139	41.139	VPGES(0.002)S(0.005)AAT(0.004)S(0.004)AT(0.011)T(0.011)GMGES(0.254)HS(0.708)PPLPK	VPGES(-26.32)S(-21.63)AAT(-21.98)S(-21.98)AT(-17.99)T(-17.99)GMGES(-4.44)HS(4.44)PPLPK	20	3	0.59855												9621700
BGIOSGA003620-PA	40.026	355	BGIOSGA003620-PA	30	pep chromosome:ASM465v1:1:19882014:19886704:1 gene:BGIOSGA003620 transcript:BGIOSGA003620-TA gene-biotype:protein-coding transcript-biotype:protein-coding description:Mitogen-activated protein kinase kinase 6 [Source:UniProtKB/TrEMBL;Acc:Q0Z7Z4]	BGIOSGA003620-PA	30	30	T	PAQETPVDKFLTASGTFKDGELRLNQRGLQL	143.5	72.652	FLT(0.001)AS(0.023)GT(0.976)FK	FLT(-28.45)AS(-16.29)GT(16.29)FK	7	2	0.28704		11725000		4530200	3505800	5991800	29240000	23713000	7865600	47365000	17476000	35744000
BGIOSGA003622-PA	145.92	1296	BGIOSGA003622-PA	1098	pep chromosome:ASM465v1:1:19908211:19921913:1 gene:BGIOSGA003622 transcript:BGIOSGA003622-TA gene-biotype:protein-coding transcript-biotype:protein-coding	BGIOSGA003622-PA	1098	1098	S	DPPFHTNIDDISRKFSPGTDFEVNRQHFTAP	86.803	86.803	KFS(1)PGTDFEVNR	KFS(49.86)PGT(-49.86)DFEVNR	3	2	-0.19492				11988000
BGIOSGA003622-PA	145.92	1296	BGIOSGA003622-PA	1029	pep chromosome:ASM465v1:1:19908211:19921913:1 gene:BGIOSGA003622 transcript:BGIOSGA003622-TA gene-biotype:protein-coding transcript-biotype:protein-coding	BGIOSGA003622-PA	1029	1029	S	SSSDSSNAQNKSRSGSPFIPIGHPADKSTGR	56.482	55.885	S(0.186)GS(0.814)PFIPIGHPADK	S(-6.4)GS(6.4)PFIPIGHPADK	3	2	0.043548
BGIOSGA003622-PA	145.92	1296	BGIOSGA003622-PA	1027	pep chromosome:ASM465v1:1:19908211:19921913:1 gene:BGIOSGA003622 transcript:BGIOSGA003622-TA gene-biotype:protein-coding transcript-biotype:protein-coding	BGIOSGA003622-PA	1027	1027	S	SMSSSDSSNAQNKSRSGSPFIPIGHPADKST	56.482	56.482	S(0.5)GS(0.5)PFIPIGHPADK	S(0)GS(0)PFIPIGHPADK	1	2	1.3335
BGIOSGA003624-PA	56.254	511	BGIOSGA003624-PA	507	pep chromosome:ASM465v1:1:20022034:20029828:1 gene:BGIOSGA003624 transcript:BGIOSGA003624-TA gene-biotype:protein-coding transcript-biotype:protein-coding	BGIOSGA003624-PA	507	507	S	DKSSKKKWFNLNLNRSDKKA-----------	73.877	73.877	WFNLNLNRS(1)DK	WFNLNLNRS(73.88)DK	9	3	-0.20012
BGIOSGA003624-PA	56.254	511	BGIOSGA003624-PA	475	pep chromosome:ASM465v1:1:20022034:20029828:1 gene:BGIOSGA003624 transcript:BGIOSGA003624-TA gene-biotype:protein-coding transcript-biotype:protein-coding	BGIOSGA003624-PA	475	475	S	TTERTMVNSVGAGSSSSRYPTESPENGNIDG	104.21	104.21	TMVNS(0.001)VGAGS(0.06)S(0.06)S(0.711)S(0.167)R	T(-74.1)MVNS(-28.05)VGAGS(-10.71)S(-10.71)S(6.3)S(-6.3)R	12	2	-0.87264				6066200
[truncated: 9,061 more rows]

## Sheet: Table S3
Table S3. Consistent presence/absence expression profile of 9311 under high-temperature stress
[truncated: 786 more rows]

## Sheet: Table S4
Table S4. Consistent presence/absence expression profile of GLA4 under high-temperature stress
[truncated: 1,173 more rows]

## Sheet: Table S5
Table S5. List of phosphosites significantly changed under high-temperature stress in 9311
[truncated: 411 more rows]

## Sheet: Table S6
Table S6. List of phosphosites significantly changed under high-temperature stress in GLA4
[truncated: 509 more rows]

[truncated: 6 more sheets: Table S7, Table S8, Table S9, Table S10, Table S11, Table S12]
